# Supplementary material
Source: publisher figshare collection journal article supplement (https://acs.figshare.com/ndownloader/files/5648508)
Supplement: Supplementary file 1 [file 5648508]

data_Manuscript

_publ_requested_journal 'Inorganic Chemistry'
_publ_title
;
 Solid State Synthesis and Structural Elucidation 
 of the Enigmatic Ammonium Octaborate: 
 (NH4)2[B7O9(OH)5]�3/4B(OH)3�5/4H2O
;
_publ_author_name
;
 Doinita Neiner,Yulia V. Sevryugina, 
 and David M. Schubert
;
_publ_author_address
;
 R&D Department, U.S. Borax Inc., 
 Rio Tinto Minerals, Greenwood Village, 
 CO  80111 USA
 E-mail: David.Schubert@riotinto.com  
;

#===END
 
_vrf_DIFMN02_{NH42B7O9OH5}43BOH35H2O_1
;
 PROBLEM: The minimum difference density is < -0.1*ZMAX*1.00
 RESPONSE: The crystal was small and diffracted very poorly. In addition there is 
 twinning and disorder of the solvate, which all can lead to somewhat more 
 negative minimum residual electron density than normally expected.
;
_vrf_PLAT417_{NH42B7O9OH5}43BOH35H2O_1
;
 PROBLEM: Short Inter D-H..H-D       H32    ..  H36A    ..       1.69 Ang.  
 RESPONSE: Both, H32 and H36A belong to the OH-groups of the disordered boric acid 
 molecules.Two crystallographically independent boric acid molecules with total 
 occupancy of 1.5 per asymmetric unit both display symmetry generated disorder. 
 The boric acid that contains atom H36A is also disordered over two orientations 
 modeled with an occupancy ratio of 0.25:0.25. In all cases H-atoms were included
 at geometrically idealized positions using AFIX 83. The disorder and inability to
 see H-atoms with X-ray radiation results in some errors in placement of hydrogens, 
 generating short inter and intramolecular contacts.
;
_vrf_PLAT098_{NH42B7O9OH5}43BOH35H2O_1
;
 PROBLEM: Large Reported Min.  (Negative) Residual Density      -1.34 eA-3  
 RESPONSE: The crystal was small and diffracted very poorly. In addition there is 
 twinning and disorder of the solvate, which all can lead to somewhat more 
 negative minimum residual electron density than normally expected.
;
_vrf_PLAT303_{NH42B7O9OH5}43BOH35H2O_1
;
 PROBLEM: Full Occupancy H-Atom  H32    with # Connections       3.00 Check 
 RESPONSE: H32 belongs to the OH-group of the disordered boric acid 
 molecule that displays symmetry generated disorder. H-atoms were included
 at geometrically idealized positions using AFIX 83. The disorder and inability to
 see H-atoms with X-ray radiation results in some errors in placement of hydrogens, 
 generating unreal contacts.
;
_vrf_PLAT416_{NH42B7O9OH5}43BOH35H2O_1
;
 PROBLEM: Short Intra D-H..H-D       H32    ..  H33     ..       1.54 Ang.  
 RESPONSE: Both, H32 and H33 belong to the OH-groups of the disordered boric acid 
 molecule that displays symmetry generated disorder.H-atoms were included
 at geometrically idealized positions using AFIX 83. The disorder and inability to
 see H-atoms with X-ray radiation results in some errors in placement of hydrogens, 
 generating short inter and intramolecular contacts.
;

data_{(NH4)2[B7O9(OH)5]}4(3B(OH)3)5H2O_(1)
 
_audit_creation_method            SHELXL-2014/6
_chemical_name_systematic
;
 diammonium pentahydroxyheptaborate boric acid water solvate
;       
_chemical_melting_point           'not measured'
_chemical_formula_moiety          
;
 {(N H4)2 B7 O9 (O H)5}4 B3 (O H )9 (H2 O)5
;
_chemical_formula_sum
 'B31 H71 N8 O70' 
_chemical_formula_weight          1638.75

loop_
 _atom_type_symbol
 _atom_type_description
 _atom_type_scat_dispersion_real
 _atom_type_scat_dispersion_imag
 _atom_type_scat_source
 'B'  'B'   0.0090   0.0039
 'International Tables Vol C Tables 4.2.6.8 and 6.1.1.4'
 'H'  'H'   0.0000   0.0000
 'International Tables Vol C Tables 4.2.6.8 and 6.1.1.4'
 'O'  'O'   0.0492   0.0322
 'International Tables Vol C Tables 4.2.6.8 and 6.1.1.4'
 'N'  'N'   0.0311   0.0180
 'International Tables Vol C Tables 4.2.6.8 and 6.1.1.4'
 
_space_group_crystal_system       monoclinic
_space_group_IT_number            14
_space_group_name_H-M_alt         'P 21/c'
_space_group_name_Hall            '-P 2ybc'
 
_shelx_space_group_comment
;
 The symmetry employed for this shelxl refinement is uniquely defined
 by the following loop, which should always be used as a source of
 symmetry information in preference to the above space-group names.
 They are only intended as comments.
;
 
loop_
 _space_group_symop_operation_xyz
 'x, y, z'
 '-x, y+1/2, -z+1/2'
 '-x, -y, -z'
 'x, -y-1/2, z-1/2'
 
_cell_length_a                    11.41368(16)
_cell_length_b                    11.88771(19)
_cell_length_c                    23.4459(3)
_cell_angle_alpha                 90
_cell_angle_beta                  90.0915(13)
_cell_angle_gamma                 90
_cell_volume                      3181.19(8)
_cell_formula_units_Z             2
_cell_measurement_temperature     100(2)
_cell_measurement_reflns_used     29860
_cell_measurement_theta_min       3.76
_cell_measurement_theta_max       76.15
 
_exptl_crystal_description        prism
_exptl_crystal_colour             colourless
_exptl_crystal_density_meas       'not measured'
_exptl_crystal_density_method     none
_exptl_crystal_density_diffrn     1.711          
_exptl_crystal_F_000              1684
_exptl_transmission_factor_min    ?
_exptl_transmission_factor_max    ?
_exptl_crystal_size_max           0.200
_exptl_crystal_size_mid           0.110
_exptl_crystal_size_min           0.040
_exptl_absorpt_coefficient_mu     1.509
_shelx_estimated_absorpt_T_min    0.752
_shelx_estimated_absorpt_T_max    0.942
_exptl_absorpt_correction_type    multi-scan
_exptl_absorpt_correction_T_min   0.89
_exptl_absorpt_correction_T_max   1.00
_exptl_absorpt_process_details    
;
 CrysAlisPro, Agilent Technologies,
 Version 1.171.37.35 (release 13-08-2014 CrysAlis171 .NET)
 (compiled Aug 13 2014,18:06:01)
 Empirical absorption correction using spherical harmonics,
 implemented in SCALE3 ABSPACK scaling algorithm.
;
_exptl_absorpt_special_details    ?

_diffrn_ambient_temperature       100(2)
_diffrn_radiation_wavelength      1.54184
_diffrn_radiation_type            CuK\a
_diffrn_source                    'sealed X-ray tube'
_diffrn_source_type               'SuperNova (Cu) X-ray Source'                 
_diffrn_measurement_device        'four-circle diffractometer'
_diffrn_measurement_device_type   'SuperNova, Dual, Cu at zero, AtlasS2'
_diffrn_measurement_method        '\w scans'
_diffrn_detector_area_resol_mean  ?
_diffrn_reflns_number             59711
_diffrn_reflns_av_unetI/netI      0.0128
_diffrn_reflns_av_R_equivalents   0.0270
_diffrn_reflns_limit_h_min        -14
_diffrn_reflns_limit_h_max        14
_diffrn_reflns_limit_k_min        -14
_diffrn_reflns_limit_k_max        14
_diffrn_reflns_limit_l_min        -29
_diffrn_reflns_limit_l_max        29
_diffrn_reflns_theta_min          3.718
_diffrn_reflns_theta_max          76.336
_diffrn_reflns_theta_full         67.684
_diffrn_measured_fraction_theta_max   0.995
_diffrn_measured_fraction_theta_full  1.000
_diffrn_reflns_Laue_measured_fraction_max    0.995
_diffrn_reflns_Laue_measured_fraction_full   1.000
_diffrn_reflns_point_group_measured_fraction_max   0.995
_diffrn_reflns_point_group_measured_fraction_full  1.000
_reflns_number_total              6636
_reflns_number_gt                 6460
_reflns_threshold_expression      'I > 2\s(I)'
_reflns_Friedel_coverage          0.000
_reflns_Friedel_fraction_max      .
_reflns_Friedel_fraction_full     .
 
_reflns_special_details
;
 Reflections were merged by SHELXL according to the crystal
 class for the calculation of statistics and refinement.
 
 _reflns_Friedel_fraction is defined as the number of unique
 Friedel pairs measured divided by the number that would be
 possible theoretically, ignoring centric projections and
 systematic absences.
;
 
_computing_data_collection        
;
 CrysAlisPro, Agilent Technologies,
 Version 1.171.37.35 (release 13-08-2014 CrysAlis171 .NET)
 (compiled Aug 13 2014,18:06:01)
;
_computing_cell_refinement        
;
 CrysAlisPro, Agilent Technologies,
 Version 1.171.37.35 (release 13-08-2014 CrysAlis171 .NET)
 (compiled Aug 13 2014,18:06:01)
;
_computing_data_reduction         
;
 CrysAlisPro, Agilent Technologies,
 Version 1.171.37.35 (release 13-08-2014 CrysAlis171 .NET)
 (compiled Aug 13 2014,18:06:01)
;
_computing_structure_solution     'ShelXT (Sheldrick, 2015)'
_computing_structure_refinement 'SHELXL-2014/6 (Sheldrick, 2014)'
_computing_molecular_graphics     'SHELXP (Sheldrick, 2008)'
_computing_publication_material   'SHELXCIF-2013/2 (Sheldrick, 2013)'
_refine_special_details
;
 The crystal is monoclinic,  simulating orthorhombic 
 (beta angle 90.09), and is a  pseudo-merohedral twin 
 (reflection of a-axis to negative a-axis).
;
_refine_ls_structure_factor_coef  Fsqd
_refine_ls_matrix_type            full
_refine_ls_weighting_scheme       calc
_refine_ls_weighting_details
'w=1/[\s^2^(Fo^2^)+(0.1242P)^2^+2.0197P] where P=(Fo^2^+2Fc^2^)/3'
_atom_sites_solution_primary      direct
_atom_sites_solution_secondary    difmap
_atom_sites_solution_hydrogens    geom
_refine_ls_hydrogen_treatment     mixed
_refine_ls_extinction_method      none
_refine_ls_extinction_coef        .
_refine_ls_number_reflns          6636
_refine_ls_number_parameters      623
_refine_ls_number_restraints      630
_refine_ls_R_factor_all           0.0524
_refine_ls_R_factor_gt            0.0515
_refine_ls_wR_factor_ref          0.1748
_refine_ls_wR_factor_gt           0.1735
_refine_ls_goodness_of_fit_ref    1.121
_refine_ls_restrained_S_all       1.080
_refine_ls_shift/su_max           0.000
_refine_ls_shift/su_mean          0.000
 
loop_
 _atom_site_label
 _atom_site_type_symbol
 _atom_site_fract_x
 _atom_site_fract_y
 _atom_site_fract_z
 _atom_site_U_iso_or_equiv
 _atom_site_adp_type
 _atom_site_occupancy
 _atom_site_site_symmetry_order  
 _atom_site_calc_flag
 _atom_site_refinement_flags_posn
 _atom_site_refinement_flags_adp
 _atom_site_refinement_flags_occupancy
 _atom_site_disorder_assembly
 _atom_site_disorder_group
O1 O 0.2986(2) -0.00278(16) 0.67828(10) 0.0168(5) Uani 1 1 d . U . . .
H1 H 0.2418 0.0421 0.6796 0.025 Uiso 1 1 calc R U . . .
O2 O 0.5024(2) -0.00300(14) 0.67107(8) 0.0183(4) Uani 1 1 d . U . . .
O3 O 0.7060(2) -0.00266(15) 0.67494(10) 0.0152(4) Uani 1 1 d . U . . .
H3 H 0.7630 0.0420 0.6760 0.023 Uiso 1 1 calc R U . . .
O4 O 0.39554(18) 0.16390(16) 0.64674(9) 0.0136(4) Uani 1 1 d . U . . .
O5 O 0.60609(18) 0.16412(15) 0.64625(9) 0.0131(4) Uani 1 1 d . U . . .
O6 O 0.5004(2) 0.33727(13) 0.65848(6) 0.0124(3) Uani 1 1 d . U . . .
O7 O 0.4992(2) 0.24236(13) 0.56719(7) 0.0152(3) Uani 1 1 d . U . . .
O8 O 0.5037(3) 0.34380(14) 0.48174(7) 0.0225(4) Uani 1 1 d . U . . .
H8 H 0.5025 0.4104 0.4697 0.034 Uiso 1 1 calc R U . . .
O9 O 0.4970(2) 0.44318(13) 0.56919(7) 0.0137(3) Uani 1 1 d . U . . .
O10 O 0.60538(19) 0.51122(15) 0.64940(9) 0.0130(4) Uani 1 1 d . U . . .
O11 O 0.39360(18) 0.50966(15) 0.65056(9) 0.0127(4) Uani 1 1 d . U . . .
O12 O 0.70733(19) 0.64128(18) 0.70764(10) 0.0182(4) Uani 1 1 d . U . . .
H12 H 0.7623 0.5964 0.7008 0.027 Uiso 1 1 calc R U . . .
O13 O 0.5006(2) 0.64113(14) 0.70805(7) 0.0177(3) Uani 1 1 d . U . . .
O14 O 0.29493(18) 0.63835(19) 0.71065(10) 0.0180(4) Uani 1 1 d . U . . .
H14 H 0.2382 0.5984 0.7001 0.027 Uiso 1 1 calc R U . . .
O15 O 0.20248(18) 0.51831(18) 0.58166(9) 0.0145(4) Uani 1 1 d . U . . .
H15 H 0.2612 0.5007 0.6014 0.022 Uiso 1 1 calc R U . . .
O16 O -0.0002(2) 0.51252(14) 0.58346(7) 0.0144(3) Uani 1 1 d . U . . .
O17 O -0.20353(19) 0.51230(17) 0.57865(9) 0.0160(4) Uani 1 1 d . U . . .
H17 H -0.2625 0.5235 0.5993 0.024 Uiso 1 1 calc R U . . .
O18 O 0.10603(19) 0.49437(16) 0.67149(9) 0.0137(4) Uani 1 1 d . U . . .
O19 O -0.10940(19) 0.49277(16) 0.66969(9) 0.0131(4) Uani 1 1 d . U . . .
O20 O -0.0005(2) 0.37458(13) 0.73391(7) 0.0143(3) Uani 1 1 d . U . . .
O21 O -0.0046(2) 0.57674(13) 0.74706(7) 0.0131(3) Uani 1 1 d . U . . .
O22 O 0.01908(18) 0.25946(15) 0.81642(8) 0.0172(4) Uani 1 1 d . U . . .
H22 H 0.0177 0.2094 0.7911 0.026 Uiso 1 1 calc R U . . .
O23 O -0.0027(2) 0.45184(13) 0.82829(6) 0.0141(3) Uani 1 1 d . U . . .
O24 O 0.10434(17) 0.62488(15) 0.83162(9) 0.0131(4) Uani 1 1 d . U . . .
O25 O -0.10890(17) 0.62539(16) 0.83193(9) 0.0131(4) Uani 1 1 d . U . . .
O26 O 0.20159(17) 0.75139(19) 0.89530(10) 0.0172(4) Uani 1 1 d . U . . .
H26 H 0.2600 0.7121 0.8864 0.026 Uiso 1 1 calc R U . . .
O27 O -0.00057(19) 0.74979(13) 0.89267(7) 0.0147(3) Uani 1 1 d . U . . .
O28 O -0.20309(17) 0.75743(19) 0.89294(9) 0.0172(4) Uani 1 1 d . U . . .
H28 H -0.2623 0.7272 0.8781 0.026 Uiso 1 1 calc R U . . .
O29 O -0.1359(2) 0.67779(19) 0.50191(10) 0.0191(4) Uani 1 1 d D . . . .
H29A H -0.155(3) 0.619(2) 0.5187(15) 0.018(9) Uiso 1 1 d D . . . .
H29B H -0.151(4) 0.690(4) 0.4672(9) 0.036(12) Uiso 1 1 d D . . . .
O31 O 0.1173(2) 0.8998(2) 0.56952(10) 0.0288(5) Uani 1 1 d . U . . .
H31 H 0.1087 0.9358 0.6001 0.043 Uiso 1 1 calc R U . . .
O32 O -0.0383(5) 1.0134(4) 0.5293(2) 0.0801(13) Uani 1 1 d . U . . .
H32 H -0.0892 0.9762 0.5116 0.120 Uiso 1 1 calc R U . . .
O33 O 0.1312(5) 0.9690(5) 0.4744(2) 0.0913(16) Uani 1 1 d . U . . .
H33 H 0.2017 0.9543 0.4816 0.137 Uiso 1 1 calc R U . . .
N1 N 0.1732(2) 0.3279(2) 0.91002(11) 0.0228(5) Uani 1 1 d D . . . .
H1A H 0.157(3) 0.399(2) 0.9185(13) 0.032(11) Uiso 1 1 d D . . . .
H1B H 0.248(2) 0.321(3) 0.8999(14) 0.036(12) Uiso 1 1 d D . . . .
H1C H 0.159(3) 0.282(2) 0.9392(11) 0.021(9) Uiso 1 1 d D . . . .
H1D H 0.128(3) 0.304(3) 0.8808(12) 0.031(11) Uiso 1 1 d D . . . .
N2 N 0.7119(2) 0.3425(2) 0.72921(11) 0.0157(5) Uani 1 1 d D . . . .
H2A H 0.724(2) 0.269(2) 0.7428(12) 0.012(8) Uiso 1 1 d D . . . .
H2B H 0.704(3) 0.393(2) 0.7602(12) 0.043(14) Uiso 1 1 d D . . . .
H2C H 0.778(2) 0.365(3) 0.7074(13) 0.028(11) Uiso 1 1 d D . . . .
H2D H 0.645(2) 0.345(3) 0.7057(13) 0.032(12) Uiso 1 1 d D . . . .
N3 N 0.1206(2) 0.6841(2) 0.50505(12) 0.0200(5) Uani 1 1 d D . . . .
H3A H 0.153(3) 0.703(3) 0.4685(12) 0.052(15) Uiso 1 1 d D . . . .
H3B H 0.158(3) 0.617(2) 0.5192(17) 0.08(2) Uiso 1 1 d D . . . .
H3C H 0.038(2) 0.667(3) 0.5001(13) 0.017(9) Uiso 1 1 d D . . . .
H3D H 0.130(3) 0.744(3) 0.5319(13) 0.032(11) Uiso 1 1 d D . . . .
N4 N 0.2903(2) 0.3426(2) 0.73062(11) 0.0157(5) Uani 1 1 d D . . . .
H4A H 0.274(3) 0.2759(17) 0.7472(10) 0.031(12) Uiso 1 1 d D . . . .
H4B H 0.2991 0.3933 0.7596 0.002(7) Uiso 1 1 d D . . . .
H4C H 0.230(2) 0.365(2) 0.7091(11) 0.026(10) Uiso 1 1 d D . . . .
H4D H 0.3564(18) 0.338(2) 0.7108(12) 0.040(13) Uiso 1 1 d D . . . .
B1 B 0.3979(3) 0.0546(2) 0.66468(13) 0.0128(5) Uani 1 1 d . U . . .
B2 B 0.6060(3) 0.0556(3) 0.66365(14) 0.0151(6) Uani 1 1 d . U . . .
B3 B 0.5005(3) 0.2302(2) 0.62978(10) 0.0123(4) Uani 1 1 d . U . . .
B4 B 0.4996(3) 0.3440(2) 0.54055(11) 0.0146(5) Uani 1 1 d . U . . .
B5 B 0.4991(3) 0.4475(2) 0.63160(10) 0.0120(4) Uani 1 1 d . U . . .
B6 B 0.6046(3) 0.5983(3) 0.68658(13) 0.0149(6) Uani 1 1 d . U . . .
B7 B 0.3964(3) 0.5959(2) 0.68873(13) 0.0139(6) Uani 1 1 d . U . . .
B8 B -0.1044(3) 0.7090(3) 0.87163(13) 0.0133(6) Uani 1 1 d . U . . .
B9 B 0.1028(3) 0.7057(2) 0.87176(13) 0.0133(6) Uani 1 1 d . U . . .
B10 B -0.0032(3) 0.5695(2) 0.80791(10) 0.0116(4) Uani 1 1 d . U . . .
B11 B 0.0038(3) 0.3627(2) 0.79165(11) 0.0138(5) Uani 1 1 d . U . . .
B12 B -0.0024(3) 0.4854(2) 0.70698(10) 0.0117(4) Uani 1 1 d . U . . .
B13 B 0.1028(3) 0.5063(2) 0.61377(14) 0.0130(6) Uani 1 1 d . U . . .
B14 B -0.1059(3) 0.5040(2) 0.61226(14) 0.0121(6) Uani 1 1 d . U . . .
B15 B 0.0681(7) 0.9637(7) 0.5228(3) 0.0669(17) Uani 1 1 d . U . . .
B16 B 0.3945(17) 0.948(2) 0.5129(10) 0.063(5) Uani 0.264(10) 1 d D U P A 1
O34 O 0.3378(7) 0.8909(8) 0.4911(4) 0.023(2) Uiso 0.264(10) 1 d D U P A 1
H34 H 0.3475 0.8973 0.4558 0.034 Uiso 0.264(10) 1 calc R U P A 1
O35 O 0.4765(12) 0.9702(11) 0.4726(7) 0.044(3) Uiso 0.264(10) 1 d D U P A 1
H35 H 0.5258 1.0159 0.4857 0.066 Uiso 0.264(10) 1 calc R U P A 1
O36 O 0.3327(16) 1.0445(13) 0.5370(7) 0.059(4) Uiso 0.264(10) 1 d D U P A 1
H36 H 0.3817 1.0922 0.5485 0.089 Uiso 0.264(10) 1 calc R U P A 1
B16A B 0.3893(17) 1.009(2) 0.4990(13) 0.068(6) Uani 0.236(10) 1 d D U P A 2
O34A O 0.3673(12) 0.9379(13) 0.4749(6) 0.044(4) Uiso 0.236(10) 1 d D U P A 2
H34A H 0.2942 0.9298 0.4747 0.066 Uiso 0.236(10) 1 calc R U P A 2
O35A O 0.4990(12) 1.0449(9) 0.5109(5) 0.029(3) Uiso 0.236(10) 1 d D U P A 2
H35A H 0.5461 0.9910 0.5079 0.043 Uiso 0.236(10) 1 calc R U P A 2
O36A O 0.2913(13) 1.0657(11) 0.5256(5) 0.037(3) Uiso 0.236(10) 1 d D U P A 2
H36A H 0.2282 1.0403 0.5123 0.056 Uiso 0.236(10) 1 calc R U P A 2
O37 O 0.3449(13) 0.8542(12) 0.5375(9) 0.070(4) Uani 0.25 1 d . U P . .
O38 O 0.3421(14) 0.7900(13) 0.6047(8) 0.064(3) Uani 0.25 1 d . U P A .
O30 O 0.4150(3) 0.2896(4) 0.8935(2) 0.0295(14) Uani 0.822(18) 1 d D U P B 1
H30A H 0.448(4) 0.248(4) 0.921(2) 0.042(13) Uiso 1 1 d D . . C 1
H30B H 0.457(5) 0.342(5) 0.874(3) 0.063(18) Uiso 1 1 d D . . D 1
O30A O 0.4202(10) 0.3315(16) 0.9136(7) 0.013(4) Uiso 0.178(18) 1 d . U P B 2
 
loop_
 _atom_site_aniso_label
 _atom_site_aniso_U_11
 _atom_site_aniso_U_22
 _atom_site_aniso_U_33
 _atom_site_aniso_U_23
 _atom_site_aniso_U_13
 _atom_site_aniso_U_12
O1 0.0154(10) 0.0093(9) 0.0256(12) 0.0057(8) 0.0012(9) 0.0000(7)
O2 0.0162(8) 0.0090(7) 0.0296(9) 0.0043(6) 0.0000(11) -0.0010(9)
O3 0.0153(9) 0.0095(9) 0.0209(11) 0.0027(7) -0.0010(9) 0.0000(7)
O4 0.0134(9) 0.0101(9) 0.0174(10) 0.0035(7) -0.0010(9) -0.0006(7)
O5 0.0149(8) 0.0081(9) 0.0162(10) 0.0008(7) 0.0005(9) 0.0007(7)
O6 0.0177(8) 0.0081(7) 0.0113(7) 0.0003(5) -0.0010(10) 0.0006(8)
O7 0.0252(8) 0.0076(7) 0.0128(7) 0.0004(5) -0.0009(10) -0.0001(9)
O8 0.0447(11) 0.0101(7) 0.0128(8) -0.0002(6) 0.0004(12) -0.0021(11)
O9 0.0210(8) 0.0079(7) 0.0123(7) 0.0011(5) -0.0012(10) 0.0000(8)
O10 0.0148(9) 0.0095(9) 0.0148(9) -0.0006(7) -0.0002(9) -0.0007(7)
O11 0.0142(9) 0.0095(9) 0.0143(9) -0.0013(7) -0.0004(9) 0.0011(7)
O12 0.0182(9) 0.0129(10) 0.0235(11) -0.0080(8) -0.0030(9) 0.0008(8)
O13 0.0171(8) 0.0149(8) 0.0211(8) -0.0073(6) 0.0008(11) 0.0006(10)
O14 0.0158(9) 0.0150(10) 0.0231(11) -0.0056(8) 0.0003(9) -0.0004(8)
O15 0.0148(9) 0.0167(9) 0.0119(9) 0.0020(7) 0.0004(8) 0.0019(8)
O16 0.0149(8) 0.0151(8) 0.0132(7) 0.0023(6) 0.0004(10) -0.0005(9)
O17 0.0141(9) 0.0188(10) 0.0151(10) 0.0036(8) -0.0017(8) -0.0001(8)
O18 0.0152(9) 0.0133(9) 0.0125(9) 0.0004(7) 0.0003(9) 0.0008(7)
O19 0.0136(9) 0.0132(9) 0.0127(9) 0.0003(7) -0.0009(9) -0.0018(7)
O20 0.0235(8) 0.0071(7) 0.0124(7) -0.0012(5) -0.0020(10) 0.0017(9)
O21 0.0202(8) 0.0064(7) 0.0127(7) -0.0011(5) -0.0001(9) 0.0013(9)
O22 0.0293(11) 0.0084(8) 0.0140(8) -0.0005(6) -0.0044(8) 0.0019(7)
O23 0.0222(8) 0.0088(7) 0.0112(7) -0.0001(6) -0.0018(10) 0.0007(9)
O24 0.0145(8) 0.0097(9) 0.0151(9) -0.0026(7) -0.0016(8) 0.0003(8)
O25 0.0142(8) 0.0120(9) 0.0131(9) -0.0034(7) -0.0003(8) -0.0004(8)
O26 0.0160(8) 0.0149(10) 0.0207(10) -0.0079(8) -0.0004(9) -0.0005(8)
O27 0.0160(8) 0.0122(7) 0.0159(7) -0.0055(6) -0.0005(10) 0.0027(10)
O28 0.0145(9) 0.0163(10) 0.0207(11) -0.0088(8) -0.0018(9) -0.0003(8)
O29 0.0291(11) 0.0133(9) 0.0148(10) 0.0017(8) -0.0007(8) -0.0009(8)
O31 0.0409(13) 0.0266(12) 0.0190(10) -0.0038(9) 0.0014(9) 0.0011(10)
O32 0.084(3) 0.077(3) 0.080(3) 0.001(2) 0.002(2) 0.016(2)
O33 0.098(4) 0.101(4) 0.075(3) 0.016(3) 0.018(3) 0.041(3)
N1 0.0278(13) 0.0232(12) 0.0174(11) 0.0057(9) -0.0006(10) 0.0013(10)
N2 0.0205(11) 0.0095(12) 0.0173(13) -0.0006(9) -0.0029(10) 0.0004(8)
N3 0.0273(13) 0.0158(11) 0.0171(12) 0.0051(10) -0.0014(10) 0.0029(10)
N4 0.0195(11) 0.0125(12) 0.0151(13) 0.0011(9) 0.0007(10) 0.0002(9)
B1 0.0163(13) 0.0079(12) 0.0143(14) -0.0024(11) 0.0013(12) 0.0006(12)
B2 0.0165(13) 0.0122(14) 0.0166(14) 0.0027(11) 0.0009(13) -0.0004(12)
B3 0.0170(11) 0.0076(10) 0.0123(10) 0.0014(8) 0.0000(13) -0.0004(13)
B4 0.0182(11) 0.0100(11) 0.0156(11) -0.0012(8) -0.0015(15) -0.0011(13)
B5 0.0135(10) 0.0075(10) 0.0150(11) -0.0010(8) -0.0012(14) 0.0006(12)
B6 0.0186(14) 0.0101(13) 0.0160(14) 0.0013(11) -0.0013(13) 0.0001(12)
B7 0.0196(13) 0.0082(12) 0.0141(14) -0.0006(11) 0.0009(13) -0.0009(11)
B8 0.0157(13) 0.0092(14) 0.0151(14) -0.0013(11) 0.0000(12) -0.0001(11)
B9 0.0164(13) 0.0090(14) 0.0144(14) 0.0009(11) -0.0001(12) -0.0008(12)
B10 0.0152(11) 0.0067(10) 0.0129(10) -0.0016(8) -0.0002(13) -0.0005(12)
B11 0.0156(11) 0.0098(11) 0.0161(11) 0.0002(9) -0.0002(14) -0.0030(13)
B12 0.0153(11) 0.0083(10) 0.0116(10) -0.0004(8) 0.0001(13) -0.0003(13)
B13 0.0170(14) 0.0080(14) 0.0139(13) 0.0016(10) 0.0008(13) -0.0001(11)
B14 0.0124(13) 0.0084(14) 0.0153(14) -0.0007(10) -0.0010(12) -0.0007(10)
B15 0.084(4) 0.071(4) 0.045(3) 0.005(3) 0.004(3) 0.002(3)
B16 0.046(9) 0.061(10) 0.082(12) 0.000(9) -0.003(9) 0.009(8)
B16A 0.044(10) 0.067(14) 0.094(14) 0.039(12) 0.003(13) -0.011(11)
O37 0.048(7) 0.044(7) 0.118(10) -0.004(7) 0.019(8) 0.013(6)
O38 0.057(8) 0.058(9) 0.078(9) -0.010(6) 0.003(7) 0.015(7)
O30 0.0298(16) 0.026(2) 0.032(2) 0.012(2) -0.0026(12) 0.0030(12)
 
_geom_special_details
;
 All esds (except the esd in the dihedral angle between two l.s. planes)
 are estimated using the full covariance matrix.  The cell esds are taken
 into account individually in the estimation of esds in distances, angles
 and torsion angles; correlations between esds in cell parameters are only
 used when they are defined by crystal symmetry.  An approximate (isotropic)
 treatment of cell esds is used for estimating esds involving l.s. planes.
;
 
loop_
 _geom_bond_atom_site_label_1
 _geom_bond_atom_site_label_2
 _geom_bond_distance
 _geom_bond_site_symmetry_2
 _geom_bond_publ_flag
O1 B1 1.361(4) . ?
O1 H1 0.8400 . ?
O2 B1 1.383(4) . ?
O2 B2 1.384(4) . ?
O3 B2 1.361(4) . ?
O3 H3 0.8400 . ?
O4 B1 1.366(4) . ?
O4 B3 1.488(4) . ?
O5 B2 1.353(4) . ?
O5 B3 1.489(4) . ?
O6 B3 1.440(3) . ?
O6 B5 1.454(3) . ?
O7 B4 1.360(3) . ?
O7 B3 1.475(3) . ?
O8 B4 1.380(3) . ?
O8 H8 0.8400 . ?
O9 B4 1.357(3) . ?
O9 B5 1.464(3) . ?
O10 B6 1.354(4) . ?
O10 B5 1.489(4) . ?
O11 B7 1.362(4) . ?
O11 B5 1.482(4) . ?
O12 B6 1.370(4) . ?
O12 H12 0.8400 . ?
O13 B7 1.381(4) . ?
O13 B6 1.387(4) . ?
O14 B7 1.364(4) . ?
O14 H14 0.8400 . ?
O15 B13 1.372(4) . ?
O15 H15 0.8400 . ?
O16 B13 1.375(4) . ?
O16 B14 1.387(4) . ?
O17 B14 1.367(4) . ?
O17 H17 0.8400 . ?
O18 B13 1.361(4) . ?
O18 B12 1.496(4) . ?
O19 B14 1.354(4) . ?
O19 B12 1.504(4) . ?
O20 B11 1.362(3) . ?
O20 B12 1.461(3) . ?
O21 B10 1.429(3) . ?
O21 B12 1.436(3) . ?
O22 B11 1.369(3) . ?
O22 H22 0.8400 . ?
O23 B11 1.366(3) . ?
O23 B10 1.478(3) . ?
O24 B9 1.345(4) . ?
O24 B10 1.499(4) . ?
O25 B8 1.363(4) . ?
O25 B10 1.489(4) . ?
O26 B9 1.368(4) . ?
O26 H26 0.8400 . ?
O27 B8 1.371(4) . ?
O27 B9 1.381(4) . ?
O28 B8 1.361(4) . ?
O28 H28 0.8400 . ?
O29 H29A 0.829(16) . ?
O29 H29B 0.845(16) . ?
O31 B15 1.445(8) . ?
O31 H31 0.8400 . ?
O32 B15 1.360(9) . ?
O32 H32 0.8400 . ?
O33 B15 1.347(9) . ?
O33 H33 0.8400 . ?
N1 H1A 0.88(2) . ?
N1 H1B 0.89(2) . ?
N1 H1C 0.89(2) . ?
N1 H1D 0.90(2) . ?
N2 H2A 0.94(2) . ?
N2 H2B 0.94(2) . ?
N2 H2C 0.95(2) . ?
N2 H2D 0.94(2) . ?
N3 H3A 0.96(3) . ?
N3 H3B 0.97(3) . ?
N3 H3C 0.97(3) . ?
N3 H3D 0.96(3) . ?
N4 H4A 0.903(17) . ?
N4 H4B 0.914(3) . ?
N4 H4C 0.890(17) . ?
N4 H4D 0.889(18) . ?
B15 O32 1.297(8) 3_576 ?
B15 B15 2.075(16) 3_576 ?
B16 O34 1.07(3) . ?
B16 O35 1.36(2) . ?
B16 O37 1.38(3) . ?
B16 O36 1.46(3) . ?
B16 O35 1.80(3) 3_676 ?
O34 O37 1.17(2) . ?
O34 H34 0.8400 . ?
O35 H35 0.8400 . ?
O36 H36 0.8400 . ?
B16A O34A 1.04(3) . ?
B16A O35A 1.35(2) . ?
B16A O35A 1.45(3) 3_676 ?
B16A O36A 1.45(3) . ?
O34A O35A 1.575(19) 3_676 ?
O34A O37 1.79(3) . ?
O34A H34A 0.8400 . ?
O35A O34A 1.575(19) 3_676 ?
O35A H35A 0.8400 . ?
O36A H36A 0.8400 . ?
O37 O38 1.75(3) . ?
O30 H30A 0.90(4) . ?
O30 H30B 0.90(4) . ?
 
loop_
 _geom_angle_atom_site_label_1
 _geom_angle_atom_site_label_2
 _geom_angle_atom_site_label_3
 _geom_angle
 _geom_angle_site_symmetry_1
 _geom_angle_site_symmetry_3
 _geom_angle_publ_flag
B1 O1 H1 109.5 . . ?
B1 O2 B2 118.30(19) . . ?
B2 O3 H3 109.5 . . ?
B1 O4 B3 124.8(2) . . ?
B2 O5 B3 125.5(2) . . ?
B3 O6 B5 126.45(17) . . ?
B4 O7 B3 122.97(18) . . ?
B4 O8 H8 109.5 . . ?
B4 O9 B5 121.61(18) . . ?
B6 O10 B5 124.3(2) . . ?
B7 O11 B5 123.7(2) . . ?
B6 O12 H12 109.5 . . ?
B7 O13 B6 118.41(19) . . ?
B7 O14 H14 109.5 . . ?
B13 O15 H15 109.5 . . ?
B13 O16 B14 119.23(19) . . ?
B14 O17 H17 109.5 . . ?
B13 O18 B12 122.6(2) . . ?
B14 O19 B12 124.0(2) . . ?
B11 O20 B12 121.56(18) . . ?
B10 O21 B12 127.40(17) . . ?
B11 O22 H22 109.5 . . ?
B11 O23 B10 122.05(18) . . ?
B9 O24 B10 124.1(2) . . ?
B8 O25 B10 123.6(2) . . ?
B9 O26 H26 109.5 . . ?
B8 O27 B9 118.41(18) . . ?
B8 O28 H28 109.5 . . ?
H29A O29 H29B 123(4) . . ?
B15 O31 H31 109.5 . . ?
B15 O32 H32 109.5 . . ?
B15 O33 H33 109.5 . . ?
H1A N1 H1B 110.3(18) . . ?
H1A N1 H1C 111.7(18) . . ?
H1B N1 H1C 109.0(17) . . ?
H1A N1 H1D 110.5(18) . . ?
H1B N1 H1D 108.3(18) . . ?
H1C N1 H1D 106.9(17) . . ?
H2A N2 H2B 109.8(17) . . ?
H2A N2 H2C 109.4(16) . . ?
H2B N2 H2C 108.2(17) . . ?
H2A N2 H2D 110.4(17) . . ?
H2B N2 H2D 110.6(17) . . ?
H2C N2 H2D 108.5(16) . . ?
H3A N3 H3B 109.4(17) . . ?
H3A N3 H3C 108.4(16) . . ?
H3B N3 H3C 107.4(17) . . ?
H3A N3 H3D 111.6(17) . . ?
H3B N3 H3D 109.8(17) . . ?
H3C N3 H3D 110.2(16) . . ?
H4A N4 H4B 106.4(16) . . ?
H4A N4 H4C 110.1(17) . . ?
H4B N4 H4C 107.8(16) . . ?
H4A N4 H4D 110.5(17) . . ?
H4B N4 H4D 109.7(16) . . ?
H4C N4 H4D 112.0(18) . . ?
O1 B1 O4 122.2(3) . . ?
O1 B1 O2 116.4(2) . . ?
O4 B1 O2 121.4(3) . . ?
O5 B2 O3 122.9(3) . . ?
O5 B2 O2 121.3(3) . . ?
O3 B2 O2 115.8(2) . . ?
O6 B3 O7 112.23(18) . . ?
O6 B3 O4 110.0(2) . . ?
O7 B3 O4 108.1(2) . . ?
O6 B3 O5 110.2(2) . . ?
O7 B3 O5 108.5(2) . . ?
O4 B3 O5 107.63(17) . . ?
O9 B4 O7 123.0(2) . . ?
O9 B4 O8 119.8(2) . . ?
O7 B4 O8 117.2(2) . . ?
O6 B5 O9 113.70(17) . . ?
O6 B5 O11 109.1(2) . . ?
O9 B5 O11 107.7(2) . . ?
O6 B5 O10 109.2(2) . . ?
O9 B5 O10 108.1(2) . . ?
O11 B5 O10 108.90(17) . . ?
O10 B6 O12 120.7(3) . . ?
O10 B6 O13 121.4(3) . . ?
O12 B6 O13 117.7(3) . . ?
O11 B7 O14 120.5(3) . . ?
O11 B7 O13 121.8(3) . . ?
O14 B7 O13 117.6(2) . . ?
O28 B8 O25 121.9(3) . . ?
O28 B8 O27 115.7(2) . . ?
O25 B8 O27 122.4(3) . . ?
O24 B9 O26 123.6(3) . . ?
O24 B9 O27 122.1(3) . . ?
O26 B9 O27 114.2(2) . . ?
O21 B10 O23 112.32(18) . . ?
O21 B10 O25 110.0(2) . . ?
O23 B10 O25 107.6(2) . . ?
O21 B10 O24 110.6(2) . . ?
O23 B10 O24 107.1(2) . . ?
O25 B10 O24 109.11(17) . . ?
O20 B11 O23 122.9(2) . . ?
O20 B11 O22 121.3(2) . . ?
O23 B11 O22 115.8(2) . . ?
O21 B12 O20 113.52(18) . . ?
O21 B12 O18 109.0(2) . . ?
O20 B12 O18 107.1(2) . . ?
O21 B12 O19 108.7(2) . . ?
O20 B12 O19 108.3(2) . . ?
O18 B12 O19 110.16(17) . . ?
O18 B13 O15 122.4(3) . . ?
O18 B13 O16 122.7(3) . . ?
O15 B13 O16 114.8(3) . . ?
O19 B14 O17 123.7(3) . . ?
O19 B14 O16 121.2(3) . . ?
O17 B14 O16 115.0(3) . . ?
O32 B15 O33 48.4(4) 3_576 . ?
O32 B15 O32 77.3(6) 3_576 . ?
O33 B15 O32 123.5(7) . . ?
O32 B15 O31 157.7(7) 3_576 . ?
O33 B15 O31 117.1(6) . . ?
O32 B15 O31 119.4(6) . . ?
O32 B15 B15 39.7(4) 3_576 3_576 ?
O33 B15 B15 86.9(5) . 3_576 ?
O32 B15 B15 37.6(4) . 3_576 ?
O31 B15 B15 154.1(7) . 3_576 ?
O34 B16 O35 102.1(19) . . ?
O34 B16 O37 55.6(16) . . ?
O35 B16 O37 137(2) . . ?
O34 B16 O36 113.1(18) . . ?
O35 B16 O36 117(2) . . ?
O37 B16 O36 105.9(16) . . ?
O34 B16 O35 158.6(19) . 3_676 ?
O35 B16 O35 57.3(13) . 3_676 ?
O37 B16 O35 134.2(19) . 3_676 ?
O36 B16 O35 84.1(16) . 3_676 ?
B16 O34 O37 75.7(17) . . ?
B16 O34 H34 109.5 . . ?
O37 O34 H34 159.8 . . ?
B16 O35 H35 109.5 . . ?
B16 O36 H36 109.5 . . ?
O34A B16A O35A 126(2) . . ?
O34A B16A O35A 76.6(19) . 3_676 ?
O35A B16A O35A 50.0(10) . 3_676 ?
O34A B16A O36A 115.1(17) . . ?
O35A B16A O36A 118(2) . . ?
O35A B16A O36A 163(2) 3_676 . ?
B16A O34A O35A 63.2(15) . 3_676 ?
B16A O34A O37 92(2) . . ?
O35A O34A O37 92.2(11) 3_676 . ?
B16A O34A H34A 109.5 . . ?
O35A O34A H34A 168.0 3_676 . ?
O37 O34A H34A 78.3 . . ?
B16A O35A O34A 168.9(16) . 3_676 ?
B16A O35A H35A 109.5 . . ?
O34A O35A H35A 59.7 3_676 . ?
B16A O36A H36A 109.5 . . ?
O34 O37 B16 48.7(12) . . ?
O34 O37 O38 173.6(16) . . ?
B16 O37 O38 137.5(18) . . ?
O38 O37 O34A 169.1(14) . . ?
H30A O30 H30B 121(5) . . ?
 
_refine_diff_density_max    0.482
_refine_diff_density_min   -1.336
_refine_diff_density_rms    0.127

_shelxl_version_number 2014/6

_shelx_res_file
;
TITL hb1_a.res in P2(1)/c
CELL 1.54184 11.41368 11.88771 23.4459 90 90.0915 90
ZERR 2 0.00016 0.00019 0.00032 0 0.0013 0
LATT 1
SYMM -X,0.5+Y,0.5-Z
SFAC B H O N
UNIT 62 142 140 16
SADI N1 H1A N1 H1B N1 H1D N1 H1C
SADI H1A H1B H1A H1C H1A H1D H1B H1C H1B H1D H1C H1D
SADI H4A H4B H4C H4A H4C H4B H4D H4B H4D H4C H4D H4A
SADI N4 H4A N4 H4C N4 H4B N4 H4D
SADI H2B H2C H2C H2A H2D H2C H2D H2A H2B H2D H2B H2A
SADI N2 H2C N2 H2D N2 H2B N2 H2A
SADI H3C H3A H3D H3C H3B H3C H3B H3A H3B H3D H3D H3A
SADI N3 H3C N3 H3D N3 H3A N3 H3B
SADI O29 H29B O29 H29A
SADI O30 H30A O30 H30B
SIZE 0.20 0.11 0.04
TEMP -173
L.S. 20
PLAN  -20
BOND $H
LIST 6
fmap 2
TWIN -1 0 0 0 1 0 0 0 1 2
EQIV $1   -x, -y+2, -z+1
EQIV $2   -x+1, -y+2, -z+1
FREE O35a O35a_$2
FREE O35a B16a_$2
FREE O35 O35_$2
FREE O35 B16_$2
FREE O34 O38
FREE O34A O38
FREE O32 O32_$1
FREE O33 O32_$1
FREE O32 O33_$1
FREE O32 B15_$1
DFIX 0.84 O29 H29A
DFIX 0.84 O29 H29B
simu
delu
acta
WGHT    0.124200    2.019700
BASF   0.44521
FVAR       0.26942   0.82152   0.52879
O1    3    0.298551   -0.002779    0.678278    11.00000    0.01535    0.00933 =
         0.02565    0.00573    0.00120    0.00002
AFIX 147
H1    2    0.241788    0.042113    0.679622    11.00000   -1.50000
AFIX   0
O2    3    0.502369   -0.003000    0.671074    11.00000    0.01621    0.00901 =
         0.02959    0.00431    0.00002   -0.00105
O3    3    0.706014   -0.002660    0.674939    11.00000    0.01528    0.00949 =
         0.02091    0.00266   -0.00100   -0.00001
AFIX 147
H3    2    0.763010    0.041994    0.676045    11.00000   -1.50000
AFIX   0
O4    3    0.395536    0.163905    0.646743    11.00000    0.01336    0.01005 =
         0.01738    0.00354   -0.00096   -0.00063
O5    3    0.606087    0.164119    0.646246    11.00000    0.01486    0.00806 =
         0.01625    0.00080    0.00052    0.00073
O6    3    0.500416    0.337268    0.658475    11.00000    0.01768    0.00807 =
         0.01134    0.00027   -0.00097    0.00062
O7    3    0.499170    0.242358    0.567186    11.00000    0.02515    0.00763 =
         0.01281    0.00036   -0.00092   -0.00006
O8    3    0.503687    0.343795    0.481739    11.00000    0.04474    0.01012 =
         0.01275   -0.00017    0.00044   -0.00214
AFIX 147
H8    2    0.502533    0.410352    0.469718    11.00000   -1.50000
AFIX   0
O9    3    0.496973    0.443182    0.569186    11.00000    0.02103    0.00787 =
         0.01228    0.00109   -0.00117   -0.00002
O10   3    0.605382    0.511221    0.649400    11.00000    0.01481    0.00947 =
         0.01483   -0.00063   -0.00018   -0.00065
O11   3    0.393600    0.509656    0.650561    11.00000    0.01419    0.00955 =
         0.01434   -0.00127   -0.00042    0.00115
O12   3    0.707325    0.641278    0.707641    11.00000    0.01815    0.01294 =
         0.02351   -0.00803   -0.00304    0.00081
AFIX 147
H12   2    0.762331    0.596358    0.700768    11.00000   -1.50000
AFIX   0
O13   3    0.500555    0.641128    0.708047    11.00000    0.01706    0.01491 =
         0.02110   -0.00727    0.00077    0.00058
O14   3    0.294929    0.638355    0.710649    11.00000    0.01582    0.01496 =
         0.02310   -0.00558    0.00028   -0.00036
AFIX 147
H14   2    0.238238    0.598389    0.700052    11.00000   -1.50000
AFIX   0
O15   3    0.202477    0.518312    0.581660    11.00000    0.01476    0.01671 =
         0.01191    0.00198    0.00043    0.00193
AFIX 147
H15   2    0.261185    0.500674    0.601373    11.00000   -1.50000
AFIX   0
O16   3   -0.000242    0.512522    0.583463    11.00000    0.01490    0.01510 =
         0.01315    0.00233    0.00042   -0.00055
O17   3   -0.203526    0.512305    0.578654    11.00000    0.01414    0.01877 =
         0.01510    0.00365   -0.00173   -0.00013
AFIX 147
H17   2   -0.262527    0.523477    0.599261    11.00000   -1.50000
AFIX   0
O18   3    0.106033    0.494368    0.671494    11.00000    0.01522    0.01331 =
         0.01249    0.00039    0.00034    0.00084
O19   3   -0.109405    0.492775    0.669694    11.00000    0.01355    0.01317 =
         0.01267    0.00031   -0.00091   -0.00182
O20   3   -0.000531    0.374584    0.733913    11.00000    0.02346    0.00713 =
         0.01239   -0.00125   -0.00195    0.00171
O21   3   -0.004628    0.576740    0.747058    11.00000    0.02024    0.00640 =
         0.01275   -0.00115   -0.00006    0.00130
O22   3    0.019077    0.259464    0.816417    11.00000    0.02925    0.00841 =
         0.01398   -0.00046   -0.00436    0.00194
AFIX 147
H22   2    0.017702    0.209424    0.791129    11.00000   -1.50000
AFIX   0
O23   3   -0.002708    0.451838    0.828294    11.00000    0.02218    0.00877 =
         0.01122   -0.00007   -0.00184    0.00066
O24   3    0.104343    0.624883    0.831618    11.00000    0.01445    0.00966 =
         0.01514   -0.00262   -0.00165    0.00035
O25   3   -0.108904    0.625386    0.831925    11.00000    0.01424    0.01199 =
         0.01313   -0.00338   -0.00031   -0.00040
O26   3    0.201588    0.751391    0.895299    11.00000    0.01600    0.01494 =
         0.02066   -0.00786   -0.00039   -0.00051
AFIX 147
H26   2    0.259966    0.712127    0.886422    11.00000   -1.50000
AFIX   0
O27   3   -0.000569    0.749789    0.892675    11.00000    0.01604    0.01218 =
         0.01592   -0.00548   -0.00052    0.00270
O28   3   -0.203088    0.757429    0.892942    11.00000    0.01451    0.01630 =
         0.02067   -0.00880   -0.00177   -0.00028
AFIX 147
H28   2   -0.262297    0.727237    0.878116    11.00000   -1.50000
AFIX   0
O29   3   -0.135913    0.677788    0.501911    11.00000    0.02906    0.01330 =
         0.01480    0.00170   -0.00068   -0.00094
H29A  2   -0.154895    0.619182    0.518684    11.00000    0.01753
H29B  2   -0.151386    0.689931    0.467215    11.00000    0.03606
O31   3    0.117268    0.899803    0.569523    11.00000    0.04088    0.02660 =
         0.01897   -0.00375    0.00137    0.00107
AFIX  83
H31   2    0.108741    0.935767    0.600075    11.00000   -1.50000
AFIX   0
O32   3   -0.038308    1.013446    0.529270    11.00000    0.08351    0.07676 =
         0.07996    0.00063    0.00211    0.01570
AFIX  83
H32   2   -0.089232    0.976212    0.511550    11.00000   -1.50000
AFIX   0
O33   3    0.131218    0.969006    0.474393    11.00000    0.09823    0.10060 =
         0.07527    0.01551    0.01825    0.04091
AFIX  83
H33   2    0.201692    0.954339    0.481609    11.00000   -1.50000
AFIX   0
N1    4    0.173219    0.327891    0.910019    11.00000    0.02782    0.02325 =
         0.01735    0.00567   -0.00055    0.00126
H1A   2    0.156846    0.398644    0.918545    11.00000    0.03197
H1B   2    0.248180    0.321271    0.899870    11.00000    0.03590
H1C   2    0.159196    0.282160    0.939174    11.00000    0.02106
H1D   2    0.128394    0.304124    0.880776    11.00000    0.03140
N2    4    0.711860    0.342473    0.729208    11.00000    0.02048    0.00946 =
         0.01730   -0.00058   -0.00291    0.00043
H2A   2    0.723565    0.269158    0.742815    11.00000    0.01206
H2B   2    0.704174    0.392686    0.760219    11.00000    0.04321
H2C   2    0.777782    0.364905    0.707390    11.00000    0.02840
H2D   2    0.644915    0.345373    0.705675    11.00000    0.03198
N3    4    0.120638    0.684054    0.505049    11.00000    0.02726    0.01576 =
         0.01706    0.00509   -0.00138    0.00287
H3A   2    0.152830    0.703340    0.468452    11.00000    0.05195
H3B   2    0.158432    0.616606    0.519180    11.00000    0.07955
H3C   2    0.037809    0.666819    0.500057    11.00000    0.01673
H3D   2    0.130226    0.743829    0.531946    11.00000    0.03204
N4    4    0.290259    0.342573    0.730619    11.00000    0.01954    0.01253 =
         0.01505    0.00113    0.00066    0.00021
H4A   2    0.273518    0.275950    0.747209    11.00000    0.03105
H4B   2   10.299088   10.393348   10.759571    11.00000    0.00171
H4C   2    0.230337    0.365041    0.709104    11.00000    0.02590
H4D   2    0.356437    0.337910    0.710803    11.00000    0.03953
B1    1    0.397894    0.054576    0.664676    11.00000    0.01630    0.00789 =
         0.01432   -0.00243    0.00130    0.00064
B2    1    0.606032    0.055639    0.663649    11.00000    0.01650    0.01224 =
         0.01660    0.00269    0.00093   -0.00042
B3    1    0.500477    0.230182    0.629775    11.00000    0.01703    0.00755 =
         0.01234    0.00137    0.00002   -0.00045
B4    1    0.499645    0.343976    0.540548    11.00000    0.01818    0.01001 =
         0.01564   -0.00115   -0.00148   -0.00106
B5    1    0.499107    0.447459    0.631603    11.00000    0.01349    0.00754 =
         0.01502   -0.00104   -0.00122    0.00060
B6    1    0.604601    0.598323    0.686580    11.00000    0.01856    0.01006 =
         0.01603    0.00134   -0.00133    0.00013
B7    1    0.396351    0.595939    0.688734    11.00000    0.01960    0.00815 =
         0.01409   -0.00057    0.00091   -0.00086
B8    1   -0.104380    0.709014    0.871632    11.00000    0.01567    0.00921 =
         0.01507   -0.00128    0.00003   -0.00007
B9    1    0.102751    0.705688    0.871755    11.00000    0.01641    0.00901 =
         0.01444    0.00094   -0.00010   -0.00083
B10   1   -0.003182    0.569498    0.807912    11.00000    0.01523    0.00667 =
         0.01294   -0.00157   -0.00021   -0.00048
B11   1    0.003754    0.362732    0.791646    11.00000    0.01556    0.00982 =
         0.01606    0.00022   -0.00020   -0.00302
B12   1   -0.002354    0.485416    0.706975    11.00000    0.01525    0.00826 =
         0.01162   -0.00044    0.00007   -0.00028
B13   1    0.102829    0.506343    0.613773    11.00000    0.01703    0.00803 =
         0.01388    0.00163    0.00085   -0.00009
B14   1   -0.105891    0.503994    0.612262    11.00000    0.01245    0.00844 =
         0.01531   -0.00065   -0.00098   -0.00068
B15   1    0.068129    0.963661    0.522835    11.00000    0.08437    0.07149 =
         0.04473    0.00456    0.00356    0.00189
PART   1
B16   1    0.394512    0.948019    0.512902    30.50000    0.04640    0.06133 =
         0.08194    0.00022   -0.00286    0.00859
O34   3    0.337823    0.890867    0.491149    30.50000    0.02276
AFIX  83
H34   2    0.347477    0.897295    0.455788    30.50000   -1.50000
AFIX   0
O35   3    0.476492    0.970189    0.472641    30.50000    0.04371
AFIX  83
H35   2    0.525757    1.015919    0.485749    30.50000   -1.50000
AFIX   0
O36   3    0.332746    1.044464    0.537021    30.50000    0.05934
AFIX  83
H36   2    0.381664    1.092169    0.548526    30.50000   -1.50000
AFIX   0
PART   2
SAME B16 > O36
B16A  1    0.389283    1.008770    0.498965   -30.50000    0.04417    0.06692 =
         0.09439    0.03884    0.00310   -0.01070
O34A  3    0.367284    0.937912    0.474893   -30.50000    0.04405
AFIX  83
H34A  2    0.294179    0.929766    0.474735   -30.50000   -1.50000
AFIX   0
O35A  3    0.498968    1.044894    0.510931   -30.50000    0.02880
AFIX  83
H35A  2    0.546125    0.990977    0.507925   -30.50000   -1.50000
AFIX   0
O36A  3    0.291276    1.065652    0.525629   -30.50000    0.03743
AFIX  83
H36A  2    0.228230    1.040289    0.512303   -30.50000   -1.50000
AFIX   0
PART   0
O37   3    0.344942    0.854248    0.537472    10.25000    0.04832    0.04377 =
         0.11788   -0.00417    0.01875    0.01298
O38   3    0.342076    0.789983    0.604714    10.25000    0.05682    0.05825 =
         0.07757   -0.00990    0.00348    0.01472
PART   1
O30   3    0.415003    0.289626    0.893483    21.00000    0.02976    0.02631 =
         0.03245    0.01219   -0.00259    0.00304
H30A  2    0.447787    0.248029    0.921402    11.00000    0.04154
H30B  2    0.456679    0.341820    0.874386    11.00000    0.06251
PART 2
O30A  3    0.420150    0.331545    0.913564   -21.00000    0.01348
PART   0

HKLF 4

REM  hb1_a.res in P2(1)/c
REM R1 =  0.0515 for    6460 Fo > 4sig(Fo)  and  0.0524 for all    6636 data
REM    623 parameters refined using    630 restraints

END

WGHT      0.1251      1.9673

REM Highest difference peak  0.482,  deepest hole -1.336,  1-sigma level  0.127
Q1    1   0.3177  0.1075  0.5125  11.00000  0.05    0.48
Q2    1   0.2979 -0.0525  0.6906  11.00000  0.05    0.36
Q3    1   0.3120  0.0140  0.6691  11.00000  0.05    0.35
Q4    1   0.6064  0.1094  0.6525  11.00000  0.05    0.34
Q5    1   0.5018  0.2430  0.5982  11.00000  0.05    0.33
Q6    1   0.3962  0.1241  0.6658  11.00000  0.05    0.32
Q7    1   0.7070 -0.0429  0.6789  11.00000  0.05    0.32
Q8    1   0.4979  0.2906  0.6411  11.00000  0.05    0.31
Q9    1   0.4966  0.1273  0.5242  11.00000  0.05    0.27
Q10   1   0.2727  0.0414  0.4395  11.00000  0.05    0.26
Q11   1   0.5011  0.3811  0.6442  11.00000  0.05    0.25
Q12   1   0.4174  0.7926  0.5777  11.00000  0.05    0.25
Q13   1   0.6792  0.0255  0.6677  11.00000  0.05    0.25
Q14   1   0.5018  0.4341  0.5871  11.00000  0.05    0.25
Q15   1   0.0792  0.0898  0.4292  11.00000  0.05    0.25
Q16   1   0.6307  0.0177  0.7287  11.00000  0.05    0.25
Q17   1   0.1939  0.1118  0.7092  11.00000  0.05    0.24
Q18   1   0.8243  0.5365  0.7504  11.00000  0.05    0.24
Q19   1   0.1657  0.0852  0.4289  11.00000  0.05    0.24
Q20   1   0.3022 -0.0061  0.7502  11.00000  0.05    0.24
;
_shelx_res_checksum    1993

_shelx_hkl_file
;
   0   0   2 1179.75   14.88
   0   0  -2 1146.73   14.89
   0   0  -2 1180.36   14.68
   0   0   3    0.21    0.28
   0   0  -3   -0.07    0.24
   0   0   4 1771.73   23.29
   0   0  -4 1775.30   23.36
   0   0  -4 1810.81   22.90
   0   0   5    0.67    0.52
   0   0  -5   -0.16    0.45
   0   0   6 2178.72   29.37
   0   0  -6 2221.54   29.53
   0   0  -7    0.02    0.52
   0   0   7   -0.41    0.51
   0   0   7   -0.23    0.56
   0   0   7    0.05    0.50
   0   0   8  344.02    7.82
   0   0  -8  364.38    8.05
   0   0   8  347.23    7.98
   0   0   8  331.47    7.95
   0   0  -8  341.87    8.00
   0   0   8  337.70    8.07
   0   0  -9    0.48    0.64
   0   0   9    0.17    0.71
   0   0   9   -0.49    0.61
   0   0   9    0.37    0.52
   0   0  -9    0.60    0.71
   0   0   9    0.76    0.66
   0   0 -10  202.08    6.57
   0   0  10  202.43    6.62
   0   0  10  207.52    6.43
   0   0  10  208.54    6.34
   0   0  10  209.14    6.56
   0   0 -10  216.06    6.60
   0   0  11   -0.94    0.73
   0   0  11    0.55    0.69
   0   0  11   -0.21    0.58
   0   0 -11    0.18    0.67
   0   0 -11   -0.42    0.69
   0   0  11    1.27    0.55
   0   0  12 2487.50   37.83
   0   0  12 2492.80   36.27
   0   0  12 2558.04   37.48
   0   0 -12 2490.10   37.56
   0   0 -12 2561.04   37.65
   0   0  12 2504.16   37.55
   0   0  13   -0.45    0.73
   0   0 -13    0.87    0.82
   0   0  13    0.37    0.67
   0   0  13   -0.02    0.62
   0   0 -13   -0.52    0.71
   0   0  14   33.72    3.08
   0   0 -14   32.06    3.07
   0   0  14   31.80    2.76
   0   0 -14   33.00    3.10
   0   0  14   31.64    3.16
   0   0  15    0.47    0.57
   0   0 -15   -0.22    0.79
   0   0  15    0.04    0.80
   0   0  15    0.76    0.85
   0   0 -15    1.45    1.08
   0   0  16   78.95    5.31
   0   0  16   74.39    5.03
   0   0  16   74.98    4.63
   0   0 -16   78.60    5.26
   0   0 -16   73.85    5.07
   0   0  16   76.69    4.88
   0   0  17    1.12    0.98
   0   0  17    0.51    1.08
   0   0 -17    0.15    0.84
   0   0  17   -0.54    0.74
   0   0  17   -0.32    0.83
   0   0  18  114.48    6.56
   0   0  18  127.72    7.18
   0   0 -18  123.49    3.77
   0   0  18  128.75    3.61
   0   0 -18  123.76    3.66
   0   0 -18  127.08    3.87
   0   0 -18  127.36    3.85
   0   0 -18  128.22    7.39
   0   0  18  118.73    7.05
   0   0 -19    0.33    0.47
   0   0 -19   -0.09    0.46
   0   0  19    0.41    0.46
   0   0 -19    1.18    0.97
   0   0  19   -0.12    1.34
   0   0  19    0.28    0.89
   0   0 -19    0.32    0.48
   0   0  19   -0.12    0.89
   0   0  20  176.18    8.99
   0   0 -20  172.24    4.75
   0   0  20  171.30    8.36
   0   0  20  171.77    8.84
   0   0 -20  186.80    9.43
   0   0 -20  167.06    4.50
   0   0 -20  173.19    4.80
   0   0  20  166.50    4.57
   0   0  21    0.09    0.43
   0   0 -21   -0.05    0.46
   0   0 -21   -0.33    0.55
   0   0  21    0.08    0.99
   0   0 -21   -0.37    0.50
   0   0 -22  109.39    3.61
   0   0 -22  108.46    3.70
   0   0  22  106.05    7.00
   0   0  22  108.96    3.55
   0   0  23    0.16    1.10
   0   0  23    0.83    0.59
   0   0 -23    0.86    0.50
   0   0 -23    0.44    0.53
   0   0  23    0.10    0.37
   0   0 -24   46.31    2.24
   0   0 -24   49.60    2.23
   0   0  24   44.01    2.06
   0   0  24   48.94    2.34
   0   0  24   44.22    4.34
   0   0  25   -0.78    1.21
   0   0  25    0.01    0.42
   0   0 -25    0.02    0.39
   0   0 -25    0.30    0.41
   0   0  25    0.09    0.36
   0   0  26    1.96    0.47
   0   0  26    2.62    0.63
   0   0 -26    1.37    0.47
   0   0  26    1.76    0.52
   0   0 -26    2.06    0.51
   0   0  27   -0.05    0.33
   0   0 -27    1.13    0.39
   0   0  27   -0.16    0.38
   0   0 -27    0.90    0.39
   0   0  28  100.28    2.60
   0   0  28   99.80    2.68
   0   0 -28  101.37    2.37
   0   0 -28   97.44    2.47
   0   0  29    0.29    0.23
   0   0  29   -0.05    0.24
   0   0  29   -0.24    0.26
   0   1   0    0.08    0.12
   0   1  -1  134.54    2.03
   0   1  -1  136.80    2.65
   0  -1   1  139.54    2.19
   0  -1  -1  135.15    2.39
   0   1  -2 1514.20   18.85
   0  -1   2 1563.67   19.02
   0  -1  -2 1505.31   19.33
   0  -1   3   64.00    1.41
   0   1   3   64.78    1.28
   0  -1  -3   61.58    2.03
   0   1  -3   68.03    1.82
   0  -1  -3   65.64    2.00
   0   1  -3   66.08    1.87
   0   1  -3   67.68    1.87
   0  -1   3   62.84    1.87
   0   1   4    0.55    0.12
   0   1  -4    0.69    0.33
   0   1   4    1.39    0.37
   0  -1   4    0.86    0.27
   0  -1  -4    1.61    0.51
   0   1   4    1.09    0.36
   0  -1  -4    0.72    0.40
   0  -1  -4    0.87    0.39
   0   1  -4    1.20    0.42
   0  -1  -5  282.90    5.70
   0  -1   5  285.44    4.97
   0   1   5  277.99    5.81
   0  -1   5  275.37    5.69
   0   1  -5  273.10    5.74
   0   1   5  280.83    5.57
   0   1  -5  282.29    5.68
   0   1   5  282.88    5.15
   0  -1  -5  279.99    5.96
   0  -1  -5  281.44    5.55
   0   1   6 1812.96   25.02
   0   1   6 1813.57   24.62
   0   1   6 1843.32   23.84
   0  -1  -6 1789.31   24.41
   0  -1  -6 1818.12   25.33
   0  -1   6 1798.21   24.89
   0   1  -6 1830.37   24.86
   0   1  -6 1852.33   24.89
   0  -1   6 1831.72   23.71
   0   1  -7 1421.96   20.71
   0   1   7 1422.80   20.98
   0   1   7 1451.83   21.33
   0  -1   7 1470.15   21.54
   0  -1   7 1417.67   19.64
   0   1  -7 1399.53   20.81
   0  -1   7 1419.14   20.86
   0  -1  -7 1428.50   21.26
   0  -1   8  459.67    8.51
   0   1  -8  463.38    9.32
   0  -1   8  460.14    9.88
   0   1   8  456.43    9.54
   0   1  -8  463.82    9.65
   0  -1  -8  464.61    9.84
   0  -1  -8  477.03    9.96
   0   1   8  465.97    9.84
   0   1   8  473.73    9.70
   0   1  -8  473.39    9.50
   0  -1   8  470.24    9.57
   0   1  -9 1463.07   22.22
   0   1  -9 1431.96   21.76
   0  -1  -9 1458.60   22.63
   0  -1   9 1426.88   22.75
   0  -1   9 1388.68   20.69
   0  -1  -9 1406.62   22.57
   0   1  -9 1429.01   22.34
   0  -1   9 1433.07   22.12
   0   1   9 1453.36   22.26
   0   1   9 1415.93   22.29
   0   1   9 1418.35   22.56
   0   1 -10  169.51    5.73
   0  -1 -10  165.99    5.90
   0  -1 -10  164.77    5.90
   0  -1  10  165.50    5.98
   0   1  10  163.66    5.84
   0   1  10  160.89    5.62
   0   1  10  162.09    5.69
   0   1 -10  162.38    5.74
   0   1  10  165.34    5.46
   0  -1  10  163.31    4.93
   0  -1  10  167.60    5.69
   0   1 -11  185.19    6.33
   0  -1  11  181.71    6.61
   0   1  11  172.24    6.23
   0  -1 -11  176.95    6.47
   0  -1  11  182.54    5.52
   0   1  11  177.97    5.99
   0   1 -11  175.65    6.30
   0  -1  11  180.31    6.25
   0  -1 -11  181.78    6.51
   0   1  11  177.43    6.48
   0   1  11  174.01    6.43
   0   1  11  179.53    6.30
   0   1 -12  752.72   15.38
   0  -1 -12  784.02   15.99
   0   1  12  721.37   15.31
   0   1  12  736.94   14.78
   0   1  12  752.23   15.44
   0   1  12  727.50   15.66
   0  -1  12  760.79   15.45
   0  -1 -12  744.79   15.74
   0   1  12  719.22   15.60
   0  -1  12  751.04   13.95
   0   1 -12  724.09   15.34
   0  -1  12  736.10   15.81
   0  -1  13  515.33   13.13
   0   1  13  504.57   12.93
   0   1 -13  502.01   12.63
   0   1 -13  515.31   12.60
   0  -1 -13  498.13   12.74
   0   1  13  492.92   11.88
   0  -1 -13  523.31   13.04
   0   1  13  493.88   12.54
   0   1  13  517.06   12.66
   0   1  13  501.71   12.87
   0  -1  13  511.22   11.20
   0   1  13  500.93   12.29
   0  -1  13  519.82   12.65
   0  -1 -14   93.67    5.32
   0   1 -14   91.50    5.12
   0  -1  14   93.00    5.11
   0  -1  14   92.09    5.22
   0   1  14   88.26    5.03
   0   1  14   94.58    5.36
   0  -1  14   94.89    4.48
   0   1 -14   89.70    5.03
   0  -1  14   87.56    4.64
   0   1  14   93.10    5.14
   0  -1  14   92.82    5.36
   0  -1 -14   90.45    5.18
   0   1  14   95.18    5.08
   0  -1 -15  335.51   10.98
   0   1  15  310.98   10.31
   0   1  15  325.97   10.55
   0   1 -15  330.64   10.58
   0   1  15  310.64   10.06
   0  -1  15  309.26   10.39
   0   1 -15  319.05   10.38
   0  -1  15  305.52    9.49
   0  -1  15  325.15   10.43
   0   1  15  320.64   10.71
   0  -1 -16  534.03   14.94
   0   1 -16  518.88   14.25
   0   1 -16  527.04   14.44
   0  -1  16  504.81   13.25
   0  -1  16  523.06   14.33
   0   1  16  523.78   14.67
   0   1  16  504.03   13.73
   0  -1  16  500.73   14.19
   0   1  16  517.04   14.28
   0   1  17  112.56    6.52
   0  -1  17  116.03    6.03
   0   1 -17  123.99    6.82
   0   1 -17  115.15    6.50
   0  -1  17  113.77    6.54
   0   1  17  119.79    6.84
   0   1 -17  124.84    3.74
   0  -1 -17  116.28    6.84
   0  -1  17  124.70    6.82
   0   1 -17  122.58    3.70
   0   1  17  115.21    6.35
   0   1 -18    7.74    0.96
   0  -1  18    8.22    0.99
   0   1 -18    6.79    1.84
   0   1 -18    8.95    1.01
   0  -1 -18    8.01    0.97
   0  -1  18    8.13    2.06
   0   1  18    8.01    2.01
   0  -1 -18    8.34    0.99
   0   1 -18    8.17    0.96
   0  -1  18    8.43    1.07
   0   1  18    5.59    1.52
   0  -1  18    8.09    1.88
   0   1  18    7.78    1.87
   0   1  18    6.86    1.78
   0   1 -18    7.84    1.00
   0  -1 -18    9.11    2.10
   0  -1  18    8.66    1.82
   0  -1 -18    7.26    0.88
   0  -1 -19    7.55    1.96
   0   1 -19    6.47    0.95
   0  -1 -19    7.60    0.97
   0  -1  19    6.77    1.78
   0   1  19    9.09    2.21
   0   1 -19    6.91    0.97
   0   1 -19    6.36    1.69
   0   1 -19    7.48    0.90
   0  -1  19    6.70    0.92
   0  -1 -19    6.56    0.92
   0  -1  19    5.90    0.79
   0   1 -19    7.16    0.92
   0  -1  19    9.03    1.95
   0   1  19    5.71    1.84
   0  -1 -19    6.96    0.93
   0   1  19    7.02    1.84
   0   1  19    9.33    2.14
   0  -1 -20    0.45    1.19
   0  -1  20   -0.35    0.95
   0  -1  20   -0.45    0.38
   0  -1  20    0.59    0.50
   0  -1 -20    0.22    0.46
   0   1  20   -1.15    1.51
   0  -1 -20    0.38    0.52
   0   1  20    0.92    1.24
   0   1  20   -0.09    1.05
   0  -1  20    0.07    1.11
   0   1 -20   -0.17    0.43
   0   1 -20    1.56    1.24
   0   1 -20    0.08    0.45
   0   1 -20    0.03    0.48
   0  -1 -20   -0.02    0.45
   0   1  21   50.20    4.87
   0  -1 -21   44.52    2.28
   0   1 -21   46.07    2.37
   0  -1 -21   45.58    2.25
   0  -1  21   41.72    2.16
   0   1  21   40.21    4.17
   0  -1  21   46.01    2.10
   0   1 -21   46.19    2.33
   0  -1  21   49.03    4.63
   0  -1 -21   45.54    2.32
   0   1 -22    3.69    0.77
   0  -1  22    2.37    0.57
   0   1  22    4.87    1.98
   0  -1 -22    3.34    0.73
   0  -1 -22    2.89    0.78
   0   1  22    2.63    1.40
   0  -1  22    2.98    1.24
   0  -1  22    3.22    0.70
   0   1  22    3.77    0.71
   0   1 -22    4.38    0.77
   0  -1  22    4.21    0.85
   0   1 -22    4.38    0.83
   0  -1  23   25.85    1.77
   0  -1 -23   29.74    1.84
   0  -1  23   28.23    3.50
   0   1 -23   25.93    1.73
   0  -1  23   27.85    1.72
   0   1 -23   29.47    1.74
   0   1 -23   25.86    1.73
   0  -1 -23   27.63    1.76
   0   1  23   23.90    3.29
   0   1  23   27.60    1.66
   0  -1  24   56.76    2.53
   0   1 -24   56.34    2.32
   0   1  24   52.97    2.40
   0   1  24   53.38    2.24
   0  -1 -24   53.76    2.39
   0  -1  24   53.16    2.29
   0  -1 -24   56.28    2.44
   0   1 -24   53.22    2.43
   0   1  24   51.11    4.82
   0  -1  25  123.99    3.49
   0   1  25  129.53    3.46
   0   1 -25  128.29    3.76
   0  -1  25  127.50    3.78
   0   1  25  124.75    7.09
   0  -1 -25  128.29    3.66
   0  -1 -25  125.80    3.63
   0   1  25  130.76    3.75
   0   1 -25  131.76    3.54
   0  -1  25  132.39    3.86
   0   1 -26   11.12    1.01
   0  -1  26   10.36    1.01
   0  -1  26   11.71    1.07
   0   1 -26   10.89    0.92
   0   1  26   10.18    0.83
   0   1  26   10.58    1.00
   0  -1 -26    9.80    0.91
   0  -1 -26    9.54    0.90
   0   1  27   69.51    2.27
   0   1 -27   64.82    2.21
   0  -1 -27   68.16    2.20
   0  -1  27   66.27    2.28
   0   1  27   67.45    2.35
   0  -1 -27   64.05    2.12
   0   1 -27   67.24    2.02
   0  -1  27   64.28    2.29
   0  -1  28   11.16    0.83
   0  -1 -28   11.48    0.77
   0  -1  28   12.77    0.74
   0   1  28   12.88    0.91
   0  -1  28   11.52    0.85
   0  -1  28   11.33    0.85
   0   1 -28   11.22    0.82
   0  -1 -28   12.57    0.82
   0   1  28   12.22    0.84
   0  -1  29   18.07    0.86
   0   1  29   18.73    0.94
   0   1  29   19.89    0.95
   0   1  29   19.50    0.83
   0  -1  29   19.40    0.91
   0   1 -29   18.29    0.83
   0   2   0 1819.72   23.55
   0  -2   0 1875.13   23.57
   0   2   0 1829.20   22.50
   0  -2   0 1845.16   23.55
   0  -2   1  566.14    8.39
   0   2  -1  544.26    8.63
   0  -2   1  552.98    7.40
   0   2   1  557.41    7.61
   0  -2   1  560.07    8.29
   0  -2  -1  546.89    7.73
   0  -2   2  388.07    5.94
   0  -2   2  378.11    5.62
   0  -2  -2  374.69    6.05
   0  -2   2  374.34    6.12
   0   2  -2  375.64    5.26
   0   2  -3  142.44    3.59
   0  -2  -3  136.27    3.37
   0  -2   3  137.70    3.00
   0   2  -3  138.12    2.82
   0   2  -4   21.85    1.38
   0  -2   4   20.81    1.20
   0  -2  -4   20.71    1.35
   0   2  -4   22.71    1.16
   0   2  -4   22.13    1.36
   0   2  -5 1112.94   16.27
   0  -2  -5 1101.84   16.67
   0  -2  -5 1117.21   16.82
   0   2   5 1138.17   14.45
   0  -2   5 1131.75   15.03
   0   2  -5 1133.96   15.88
   0   2  -5 1142.86   16.15
   0  -2   5 1118.73   16.08
   0  -2  -5 1127.64   16.75
   0   2   5 1125.27   16.40
   0  -2  -6 1566.56   22.27
   0   2  -6 1578.23   21.44
   0   2   6 1600.92   21.90
   0  -2   6 1588.28   21.67
   0   2   6 1564.08   21.93
   0  -2   6 1595.15   20.46
   0  -2  -6 1588.68   22.43
   0   2  -6 1595.24   21.25
   0  -2  -6 1598.25   22.10
   0   2   6 1631.34   21.34
   0   2   7 1455.02   20.43
   0  -2  -7 1475.06   21.93
   0   2  -7 1459.95   21.67
   0  -2   7 1431.59   21.08
   0   2   7 1457.16   21.24
   0  -2  -7 1414.54   21.50
   0  -2   7 1422.98   19.85
   0   2   7 1447.61   21.40
   0   2  -7 1462.06   20.93
   0  -2  -7 1478.43   21.35
   0  -2  -8 2688.15   37.30
   0   2  -8 2682.82   36.82
   0  -2   8 2673.06   36.36
   0  -2   8 2688.04   35.53
   0   2  -8 2720.47   36.25
   0   2   8 2597.06   35.20
   0   2  -8 2756.84   37.68
   0   2  -8 2711.34   36.65
   0  -2   8 2651.71   35.02
   0  -2  -8 2707.38   36.42
   0   2   8 2652.54   36.36
   0  -2  -8 2723.36   37.27
   0   2   8 2729.36   36.75
   0   2  -9   98.54    4.18
   0  -2   9   95.14    4.06
   0   2  -9   98.38    4.43
   0   2   9   96.07    4.31
   0  -2  -9  101.03    4.38
   0   2   9   96.08    3.48
   0  -2   9   98.69    3.61
   0   2  -9  100.04    4.16
   0   2  -9  105.30    4.10
   0  -2   9   98.92    4.08
   0   2   9   97.89    3.98
   0   2   9  105.39    4.23
   0  -2   9   94.98    3.50
   0   2 -10  828.24   14.95
   0   2 -10  817.23   15.89
   0   2  10  802.70   15.15
   0   2  10  794.81   14.53
   0   2 -10  811.18   15.22
   0  -2  10  789.81   13.65
   0  -2  10  805.10   15.00
   0  -2  10  802.71   15.19
   0  -2  10  798.92   13.80
   0   2 -10  791.99   15.08
   0   2  10  787.44   15.20
   0   2  10  796.78   15.59
   0  -2 -10  827.92   15.78
   0   2  11  316.69    9.12
   0  -2  11  312.21    8.59
   0   2  11  305.34    8.73
   0   2  11  328.98    8.88
   0  -2  11  308.21    8.70
   0   2 -11  317.95    8.74
   0   2 -11  329.57    8.68
   0  -2 -11  324.57    9.22
   0   2  11  303.31    8.16
   0   2 -11  324.08    8.81
   0   2 -11  311.26    9.13
   0  -2  11  314.60    7.79
   0  -2  11  315.91    7.48
   0   2 -12 1533.75   25.90
   0   2  12 1528.04   26.06
   0   2  12 1518.86   25.01
   0   2  12 1613.89   26.26
   0  -2  12 1561.72   26.08
   0   2  12 1582.39   26.75
   0   2 -12 1577.16   25.71
   0   2 -12 1560.28   25.86
   0  -2 -12 1632.45   27.02
   0  -2  12 1596.78   26.00
   0  -2  12 1559.72   24.32
   0   2  13   14.93    1.90
   0   2 -13   14.92    1.95
   0   2  13   11.82    1.87
   0  -2 -13   15.69    2.19
   0  -2  13   15.34    2.04
   0   2  13   16.38    2.13
   0  -2  13   13.66    1.68
   0   2  13   13.24    2.03
   0   2 -13   15.79    2.04
   0   2  13   14.24    2.01
   0  -2  13   15.70    2.11
   0  -2  14   64.11    4.35
   0   2  14   66.21    4.49
   0   2  14   67.62    4.51
   0   2  14   59.31    4.16
   0   2 -14   67.33    4.34
   0   2  14   67.57    4.61
   0   2  14   66.06    4.01
   0  -2 -14   78.03    4.94
   0  -2  14   62.66    3.73
   0  -2  14   66.91    4.35
   0   2  14   71.25    4.51
   0   2 -14   69.22    4.36
   0  -2  15   85.66    5.17
   0  -2 -15   84.33    5.40
   0  -2  15   76.64    4.90
   0   2 -15   79.02    4.92
   0   2 -15   86.93    5.12
   0   2  15   83.48    5.15
   0   2  15   81.77    5.26
   0  -2  15   78.21    4.36
   0   2  15   80.32    5.13
   0   2  15   78.48    5.20
   0   2  15   77.63    4.95
   0  -2  16   70.21    4.96
   0   2 -16   75.67    5.07
   0   2 -16   75.95    5.03
   0  -2  16   75.63    5.08
   0   2  16   74.44    5.11
   0   2  16   75.96    5.26
   0   2  16   73.66    5.01
   0   2  16   74.13    5.04
   0  -2 -16   79.10    5.48
   0   2 -17  117.05    6.52
   0   2 -17  118.64    3.66
   0  -2  17  112.52    6.49
   0   2 -17  123.07    6.66
   0   2  17  112.37    6.57
   0  -2  17  119.05    6.64
   0   2 -17  117.97    3.67
   0   2  17  118.30    6.85
   0   2 -17  112.69    3.45
   0  -2 -17  113.78    3.59
   0  -2  17  122.54    3.69
   0  -2 -17  116.78    6.94
   0  -2  17  118.04    3.47
   0   2  17  116.64    6.62
   0  -2 -17  119.56    3.63
   0  -2 -18   76.69    2.92
   0  -2 -18   76.15    2.91
   0   2  18   81.41    5.86
   0   2  18   74.21    5.45
   0   2 -18   77.39    5.52
   0   2  18   82.14    5.82
   0  -2 -18   77.37    3.01
   0   2 -18   74.99    2.95
   0   2 -18   74.23    2.81
   0  -2 -18   83.61    6.08
   0   2 -18   70.62    5.20
   0  -2  18   77.71    5.54
   0  -2  18   71.90    2.74
   0   2 -18   80.86    3.04
   0  -2  18   73.69    5.38
   0  -2  18   71.40    2.85
   0   2 -19   35.19    1.93
   0   2 -19   38.11    2.12
   0  -2  19   33.85    1.95
   0  -2 -19   37.39    2.11
   0   2  19   35.11    3.93
   0  -2 -19   36.04    2.01
   0   2  19   29.54    3.57
   0   2 -19   33.98    3.74
   0   2 -19   36.84    2.09
   0   2  19   34.28    3.94
   0  -2  19   34.01    1.87
   0  -2 -19   37.50    4.23
   0  -2  19   34.24    3.79
   0  -2 -19   34.48    1.98
   0   2  19   38.18    4.05
   0  -2  19   36.22    3.88
   0   2  20  428.15   14.68
   0  -2  20  384.52    7.64
   0  -2 -20  407.03    8.05
   0   2  20  406.19   13.94
   0   2 -20  388.14    7.78
   0  -2  20  407.87    8.30
   0  -2 -20  414.65    8.23
   0   2  20  419.18   14.41
   0   2 -20  420.26   14.10
   0   2 -20  408.20    8.17
   0  -2 -20  398.08    8.01
   0  -2  20  391.71   13.41
   0  -2  20  388.57    7.95
   0   2 -20  410.40    8.22
   0   2 -21  114.13    3.83
   0  -2  21  112.17    3.85
   0   2  21  115.40    7.25
   0   2  21  116.57    7.49
   0  -2  21  115.58    6.97
   0   2 -21  112.61    3.79
   0  -2 -21  112.22    3.79
   0  -2  21  107.98    3.65
   0  -2 -21  108.40    3.65
   0   2  22   35.85    4.10
   0  -2 -22   32.15    1.96
   0  -2 -22   30.00    1.84
   0  -2  22   31.77    1.87
   0   2 -22   34.13    2.00
   0   2 -22   33.31    2.00
   0  -2  22   34.69    2.08
   0  -2  23   13.54    1.29
   0  -2  23   13.70    1.24
   0  -2 -23   15.15    1.33
   0   2  23   16.08    2.84
   0   2 -23   15.75    1.27
   0   2  23   12.87    1.13
   0   2 -23   15.65    1.37
   0  -2  23   14.39    1.34
   0  -2 -23   14.74    1.31
   0   2 -23   15.61    1.39
   0   2  24  176.25    4.28
   0   2  24  177.56    8.91
   0   2 -24  182.62    4.34
   0  -2 -24  175.38    4.48
   0  -2  24  177.42    4.73
   0  -2  24  179.30    4.76
   0  -2 -24  177.80    4.65
   0  -2  24  172.09    4.45
   0   2 -24  176.58    4.70
   0   2 -24  177.71    4.69
   0  -2 -25  109.05    3.33
   0   2  25  104.16    6.48
   0  -2  25  107.32    3.39
   0   2  25  105.43    3.24
   0   2 -25  107.91    3.38
   0  -2 -25  103.92    3.16
   0   2  25  104.19    2.96
   0  -2  25  106.67    3.39
   0   2 -25  108.49    3.01
   0  -2 -26    7.74    0.79
   0   2 -26    8.67    0.93
   0   2 -26    8.25    0.73
   0  -2 -26    8.57    0.86
   0  -2  26    7.16    0.83
   0   2  26    7.69    0.81
   0  -2  26    7.79    0.90
   0  -2 -27   11.62    0.84
   0   2 -27   13.26    1.00
   0   2  27   12.96    0.93
   0  -2  27   11.68    0.91
   0  -2  27   13.82    1.00
   0  -2 -27   13.20    0.94
   0  -2  27   12.83    0.98
   0  -2 -28    0.56    0.32
   0   2 -28    0.66    0.33
   0  -2  28    0.41    0.25
   0   2  28    0.60    0.29
   0  -2  28    0.47    0.28
   0  -2  28    0.62    0.32
   0   2  28    0.46    0.31
   0  -2  28    0.13    0.25
   0   2  29   34.77    1.21
   0  -2  29   34.93    1.16
   0  -3   0    0.21    0.41
   0  -3   0   -0.30    0.42
   0   3   0    0.00    0.25
   0   3   0   -0.10    0.44
   0   3   0   -0.49    0.41
   0   3  -1  266.54    5.78
   0   3   1  270.23    4.54
   0  -3  -1  267.73    5.79
   0  -3  -1  273.36    5.84
   0   3  -1  273.82    5.46
   0  -3   1  256.91    5.43
   0  -3   1  269.65    5.56
   0  -3   2  552.98    7.72
   0   3  -2  555.18    9.52
   0  -3  -2  539.43    8.30
   0   3   2  555.70    7.98
   0  -3   2  544.12    8.92
   0  -3   2  543.52    8.78
   0  -3  -3 1568.62   21.33
   0  -3   3 1610.32   21.45
   0   3   3 1602.06   20.69
   0  -3   3 1613.67   20.51
   0   3  -3 1564.65   19.80
   0  -3   3 1594.84   21.10
   0   3  -3 1587.14   22.51
   0   3  -4  411.79    8.31
   0  -3   4  381.64    7.09
   0  -3   4  378.79    6.66
   0   3  -4  391.73    6.31
   0  -3  -4  392.16    8.15
   0   3  -4  396.61    8.05
   0  -3   4  409.61    8.37
   0  -3  -4  386.00    8.08
   0  -3  -4  387.85    7.45
   0  -3   4  397.47    6.79
   0   3  -5 9772.64  119.13
   0   3  -5 9471.56  116.25
   0  -3  -5 9949.02  119.05
   0  -3   5 9839.32  116.95
   0   3  -5 9935.66  118.43
   0  -3  -5 9999.00  118.97
   0  -3  -5 9755.95  118.15
   0   3  -5 9871.87  118.49
   0  -3  -6  183.09    5.49
   0  -3  -6  183.52    5.31
   0  -3   6  180.88    4.72
   0  -3  -6  183.27    5.57
   0   3  -6  182.82    5.13
   0   3  -6  185.17    5.24
   0   3   6  192.09    3.93
   0   3  -6  188.99    4.51
   0   3   6  186.97    5.02
   0  -3   7   31.87    2.14
   0   3  -7   31.57    1.88
   0  -3   7   34.98    2.08
   0   3   7   34.31    1.32
   0  -3  -7   33.71    2.29
   0   3  -7   32.69    2.09
   0   3  -7   34.41    2.51
   0  -3  -7   33.97    2.29
   0   3   7   32.33    2.17
   0  -3  -7   35.63    2.43
   0   3   7   35.28    2.20
   0  -3  -8 1120.92   19.07
   0   3   8 1148.32   18.59
   0  -3  -8 1148.81   18.87
   0   3   8 1142.61   17.83
   0   3  -8 1149.82   17.59
   0   3  -8 1094.10   17.73
   0  -3   8 1119.28   18.07
   0  -3  -8 1142.81   19.02
   0   3   8 1166.38   18.50
   0   3  -8 1130.35   19.64
   0  -3   8 1122.30   18.26
   0  -3   8 1133.96   18.02
   0   3  -8 1136.61   19.15
   0   3  -8 1118.50   18.22
   0   3  -9  683.77   14.28
   0   3   9  687.65   13.19
   0  -3   9  648.85   12.50
   0  -3   9  675.79   12.83
   0   3  -9  672.26   12.51
   0   3  -9  661.58   12.98
   0   3  -9  668.68   12.26
   0  -3   9  666.17   12.98
   0   3   9  674.79   12.34
   0   3   9  684.35   13.26
   0  -3  -9  688.94   13.43
   0  -3  -9  667.83   13.58
   0  -3  -9  681.16   13.73
   0   3  -9  687.18   13.76
   0  -3  10   37.07    2.71
   0  -3  10   35.16    2.56
   0   3  10   36.59    2.34
   0   3 -10   33.77    2.54
   0   3 -10   36.26    2.96
   0   3 -10   34.97    2.42
   0   3  10   35.65    2.46
   0   3  10   34.88    2.60
   0   3  10   34.59    2.59
   0   3 -10   31.64    2.12
   0   3 -10   35.08    2.77
   0   3  10   37.14    2.85
   0  -3 -10   36.81    2.85
   0   3 -11    6.00    1.22
   0   3  11    4.61    1.06
   0   3 -11    5.46    1.33
   0   3 -11    4.19    1.06
   0   3 -11    6.54    1.22
   0   3  11    4.84    1.12
   0  -3  11    5.39    1.25
   0   3  11    7.20    1.26
   0  -3  11    4.96    1.06
   0   3  11    3.41    1.04
   0   3 -12    4.19    1.17
   0   3 -12    4.24    1.12
   0  -3  12    4.69    1.22
   0   3 -12    6.14    1.39
   0   3 -12    6.30    1.38
   0  -3 -12    4.88    1.38
   0   3  12    5.91    1.33
   0  -3  12    4.56    1.17
   0   3  12    3.77    1.20
   0   3  12    4.75    1.22
   0   3  13  199.85    7.52
   0   3 -13  202.76    7.74
   0   3 -13  198.10    7.98
   0   3 -13  202.91    7.21
   0  -3 -13  207.20    8.12
   0   3  13  194.96    7.84
   0   3  13  193.92    6.85
   0   3  13  193.99    7.53
   0  -3  13  188.84    7.31
   0  -3  13  198.56    7.37
   0   3 -13  192.51    7.28
   0   3  14  167.97    6.55
   0   3  14  170.75    7.20
   0  -3  14  168.52    7.07
   0   3  14  175.40    7.74
   0  -3 -14  166.70    7.57
   0  -3  14  167.06    7.06
   0   3 -14  170.44    7.10
   0   3  14  169.74    7.54
   0   3 -14  170.80    6.93
   0   3  14  173.07    7.35
   0   3 -15  105.67    5.74
   0   3 -15  108.52    5.69
   0   3  15  105.66    6.20
   0  -3  15  103.40    5.71
   0   3  15   99.05    5.94
   0   3  15  107.81    5.32
   0   3  15  102.11    5.81
   0  -3  15  102.29    5.67
   0  -3 -15  100.63    6.08
   0   3  15  104.82    5.84
   0   3  15  101.77    6.08
   0   3  16   44.91    4.05
   0  -3  16   45.94    2.23
   0   3  16   44.46    4.11
   0  -3 -16   49.01    2.28
   0   3 -16   45.25    2.17
   0   3  16   45.46    4.21
   0   3  16   49.62    4.38
   0  -3 -16   46.90    2.19
   0  -3  16   46.63    4.01
   0   3 -16   44.62    3.86
   0  -3 -16   50.73    4.47
   0   3 -16   47.60    3.92
   0   3  16   47.66    4.08
   0  -3  16   40.99    3.74
   0   3 -16   45.77    2.18
   0  -3  17  279.19   10.33
   0   3 -17  268.15    5.99
   0  -3 -17  282.65    6.29
   0   3 -17  274.35    6.17
   0  -3 -17  270.49    6.14
   0   3  17  275.29   10.43
   0   3 -17  284.19   10.28
   0  -3 -17  273.12    6.01
   0   3  17  280.48   10.63
   0  -3  17  263.90    5.91
   0   3  17  251.49   10.52
   0   3 -17  269.39    5.83
   0  -3  17  273.78    6.26
   0   3 -17  297.61    6.34
   0   3 -17  262.46    9.99
   0  -3 -17  282.68   11.25
   0   3  17  283.87   11.00
   0  -3  17  272.90    6.14
   0  -3  17  287.94   10.59
   0   3 -18   10.86    1.06
   0   3 -18   14.25    1.31
   0  -3  18   13.89    1.33
   0   3  18   10.37    2.04
   0  -3 -18   12.18    1.18
   0  -3  18   10.24    1.93
   0   3 -18   12.79    1.25
   0  -3 -18   14.26    1.33
   0   3 -18   13.05    1.21
   0  -3  18   12.02    1.15
   0   3  18   13.60    2.50
   0   3 -18   11.58    2.17
   0  -3 -18   14.25    2.66
   0  -3  18   15.75    2.66
   0  -3  18   12.07    1.20
   0   3  18   14.15    2.53
   0  -3 -18   19.24    1.52
   0   3  18   11.07    2.33
   0  -3 -19    9.26    1.13
   0  -3 -19   10.60    1.16
   0  -3 -19    8.53    1.07
   0  -3  19   11.33    2.31
   0   3 -19    8.90    1.03
   0  -3 -19    6.51    1.82
   0  -3  19    9.54    1.03
   0  -3  19    9.17    1.07
   0  -3  19    9.84    1.18
   0   3  19   12.22    2.46
   0   3 -19    7.33    0.98
   0   3 -19    8.31    0.97
   0   3 -19    9.19    1.08
   0   3  19    8.73    1.92
   0   3 -20   14.38    1.33
   0  -3  20   14.46    1.36
   0  -3 -20   14.48    1.32
   0  -3  20   14.48    1.31
   0   3 -20   14.26    1.29
   0   3 -20   12.36    1.15
   0  -3 -20   14.38    1.36
   0   3  20   15.29    2.76
   0   3  20   12.54    2.46
   0   3 -20   15.09    1.24
   0  -3 -20   13.49    1.28
   0  -3  20   12.22    1.27
   0   3  21    1.71    1.09
   0  -3 -21    0.02    0.58
   0   3  21   -0.01    0.89
   0   3  21   -0.01    0.99
   0   3 -21   -0.16    0.53
   0  -3  21   -0.29    0.45
   0  -3  21   -0.19    0.46
   0   3 -21    0.08    0.47
   0  -3  21    0.08    0.44
   0  -3 -21    0.52    0.52
   0  -3  22    3.45    0.73
   0   3 -22    5.18    0.89
   0  -3 -22    3.80    0.69
   0   3 -22    5.06    0.88
   0  -3 -22    4.22    0.82
   0   3  22    3.47    1.40
   0  -3  22    5.62    0.92
   0  -3  22    4.38    0.82
   0   3 -23    0.23    0.55
   0  -3  23    0.30    0.50
   0  -3  23    0.00    0.45
   0  -3 -23   -0.08    0.44
   0   3 -23    0.53    0.52
   0  -3 -23   -0.54    0.45
   0   3  23   -0.21    0.92
   0   3 -24    3.44    0.73
   0  -3  24    2.71    0.63
   0  -3  24    2.33    0.63
   0   3  24    2.86    0.57
   0   3  24    3.19    1.42
   0  -3 -24    2.98    0.59
   0   3 -24    2.86    0.71
   0  -3 -24    2.82    0.62
   0  -3  24    5.47    1.45
   0   3 -25    5.78    0.81
   0  -3  25    5.11    0.75
   0  -3 -25    4.54    0.63
   0   3  25    5.05    0.74
   0  -3 -25    5.48    0.81
   0  -3  25    4.57    0.73
   0  -3  26   25.29    1.36
   0   3 -26   27.38    1.51
   0  -3  26   26.49    1.45
   0  -3  26   27.69    1.52
   0  -3 -26   28.43    1.50
   0  -3 -26   25.58    1.27
   0   3  26   28.16    1.39
   0  -3 -27   10.69    0.86
   0  -3  27    9.79    0.76
   0  -3  27    9.91    0.81
   0   3 -27   10.32    0.86
   0   3  27    9.99    0.75
   0  -3  27    9.90    0.85
   0  -3  27   10.01    0.78
   0   3 -28    0.88    0.32
   0  -3  28    0.84    0.29
   0  -3  28    1.03    0.33
   0  -3 -28    0.75    0.32
   0   3  28    0.67    0.33
   0  -4   0 1629.09   23.55
   0   4   0 1649.98   23.20
   0  -4   0 1607.46   23.20
   0   4   0 1624.76   22.61
   0  -4   0 1580.19   23.07
   0  -4  -1  165.45    4.93
   0  -4  -1  167.79    4.92
   0   4  -1  167.09    4.51
   0  -4   1  165.46    4.70
   0   4   1  168.77    3.47
   0  -4   1  163.47    4.61
   0  -4   1  174.14    5.08
   0   4  -1  168.73    4.90
   0   4   1  164.34    4.70
   0   4  -2  985.28   15.74
   0   4  -2  980.51   16.10
   0  -4   2  991.32   15.96
   0   4  -2  961.25   15.65
   0  -4   2  956.10   15.02
   0   4   2  961.94   13.23
   0  -4  -2  969.34   15.78
   0  -4  -2  942.70   15.73
   0  -4   2  911.40   14.69
   0  -4   3   42.01    2.19
   0  -4  -3   43.36    2.55
   0   4   3   42.08    1.69
   0  -4   3   44.80    2.59
   0  -4   3   40.57    2.10
   0  -4  -3   45.38    2.58
   0   4  -3   44.38    2.51
   0   4  -3   42.49    2.55
   0  -4   3   42.75    1.57
   0  -4  -3   44.44    1.99
   0  -4  -4 5508.59   67.62
   0  -4   4 5308.84   65.15
   0   4   4 5510.00   64.56
   0   4  -4 5568.91   68.19
   0  -4  -4 5281.58   67.53
   0   4  -4 5333.40   67.47
   0  -4   4 5294.19   65.71
   0  -4  -4 5282.86   65.59
   0   4  -4 5375.68   67.58
   0  -4   4 5332.96   64.23
   0  -4   4 5480.80   67.79
   0   4  -4 5017.10   62.84
   0  -4  -5  366.42    8.66
   0  -4   5  330.44    8.31
   0   4  -5  327.94    5.73
   0  -4   5  329.32    6.52
   0  -4  -5  358.21    7.66
   0   4  -5  324.71    8.04
   0  -4  -5  366.73    8.64
   0   4  -5  318.40    8.19
   0  -4   5  321.52    6.54
   0  -4   5  333.82    7.03
   0   4  -5  323.84    8.09
   0   4  -5  336.64    8.56
   0   4   5  358.22    7.12
   0   4   5  351.08    6.76
   0   4  -6    0.33    0.56
   0  -4  -6    3.54    1.17
   0  -4   6    0.63    0.41
   0   4  -6    0.32    0.49
   0  -4   6    0.52    0.40
   0  -4   6    0.75    0.78
   0  -4   6    1.47    0.48
   0   4   6    4.75    1.04
   0  -4  -6    4.58    1.33
   0  -4  -6    5.62    1.49
   0   4  -6    1.02    0.36
   0   4  -6    0.19    0.59
   0   4  -7   84.37    4.29
   0  -4   7   80.41    2.60
   0   4   7   80.79    2.73
   0   4  -7   80.49    3.75
   0   4  -7   79.09    3.38
   0  -4   7   81.14    3.16
   0  -4  -7   81.46    3.99
   0  -4   7   81.79    3.25
   0   4   7   82.24    3.44
   0  -4  -7   79.65    3.70
   0  -4  -7   83.70    4.10
   0   4  -7   78.08    2.83
   0  -4   8   80.63    3.46
   0   4   8   86.76    4.08
   0  -4  -8   84.91    4.16
   0   4  -8   83.84    4.43
   0  -4  -8   86.36    4.32
   0   4  -8   79.42    3.78
   0   4  -8   82.60    3.67
   0  -4  -8   87.26    4.11
   0   4  -8   85.99    3.23
   0   4   8   87.59    3.78
   0  -4   8   80.59    3.20
   0  -4   9    8.64    1.25
   0   4  -9    7.71    1.26
   0   4   9    8.89    1.30
   0  -4  -9    7.32    1.36
   0   4  -9    9.24    1.33
   0  -4  -9    9.15    1.52
   0   4   9    9.97    1.41
   0  -4   9    7.04    1.02
   0   4  -9    7.98    1.44
   0   4   9   10.09    1.48
   0   4  -9    9.84    1.22
   0   4  -9    7.60    1.40
   0  -4  -9    9.21    1.53
   0   4 -10   69.60    4.36
   0  -4  10   61.07    3.40
   0   4  10   66.56    3.83
   0   4 -10   64.08    3.53
   0   4 -10   64.90    4.05
   0   4 -10   67.95    3.67
   0   4  10   71.51    3.82
   0   4 -10   71.37    3.39
   0   4  10   67.44    3.53
   0  -4 -10   68.53    4.07
   0  -4 -10   67.04    4.11
   0  -4 -10   68.93    4.03
   0  -4  11    0.73    0.57
   0   4  11    0.40    0.58
   0   4 -11    0.18    0.60
   0   4  11    0.84    0.69
   0   4  11   -0.06    0.69
   0   4 -11    0.28    0.82
   0   4  11    0.75    0.61
   0   4 -11    0.11    0.58
   0  -4 -11    0.08    0.56
   0   4 -12  366.22   11.04
   0  -4 -12  366.27   10.99
   0   4 -12  372.62    9.51
   0  -4  12  356.96    9.92
   0   4  12  379.82    9.46
   0   4  12  373.00   10.53
   0   4 -12  357.40   11.25
   0   4  12  351.06   10.90
   0   4 -12  360.27   10.01
   0   4  12  369.01   10.29
   0   4  13  602.59   14.74
   0  -4 -13  584.63   15.07
   0  -4  13  573.38   13.77
   0   4 -13  589.89   13.93
   0   4 -13  592.54   15.09
   0   4 -13  604.71   13.42
   0   4  13  594.26   15.29
   0   4  13  598.99   14.33
   0   4 -13  575.18   15.37
   0  -4  14  759.23   16.95
   0   4 -14  745.31   18.47
   0   4 -14  787.08   18.36
   0   4  14  769.72   17.74
   0   4 -14  751.41   16.87
   0   4  14  771.99   17.38
   0   4  14  763.98   18.41
   0  -4 -14  774.14   18.45
   0   4  15   31.97    3.42
   0   4  15   34.15    3.67
   0   4  15   30.36    3.27
   0   4  15   33.64    3.33
   0  -4  15   32.52    3.13
   0  -4 -15   35.15    3.70
   0   4  15   36.91    3.75
   0   4 -15   32.18    3.13
   0  -4  16   33.71    1.95
   0  -4 -16   32.70    1.86
   0  -4  16   32.09    1.90
   0   4 -16   37.41    1.87
   0   4  16   31.39    3.55
   0  -4  16   32.06    1.87
   0   4 -16   31.26    1.84
   0   4  16   34.58    3.90
   0   4  16   31.72    3.55
   0   4  16   32.84    3.49
   0  -4 -16   32.12    1.91
   0   4 -16   32.18    1.87
   0   4 -16   32.86    3.29
   0  -4 -16   36.30    3.87
   0  -4 -16   34.71    1.86
   0  -4  16   30.60    3.24
   0   4  16   32.57    3.36
   0   4 -16   34.39    1.91
   0   4 -17  163.87    4.54
   0  -4 -17  164.52    4.56
   0  -4  17  155.17    4.52
   0   4 -17  159.38    4.45
   0  -4  17  161.19    7.75
   0   4  17  151.86    8.24
   0   4  17  172.16    8.18
   0  -4 -17  172.86    8.84
   0  -4 -17  159.84    4.34
   0   4  17  162.16    7.98
   0  -4 -17  162.02    4.61
   0   4  17  163.05    8.67
   0  -4  17  159.90    4.57
   0   4  17  164.67    8.38
   0   4 -17  156.97    4.13
   0  -4  17  165.41    4.67
   0   4 -17  162.83    4.55
   0   4 -17  161.67    7.59
   0   4 -18   20.97    1.45
   0  -4 -18   23.50    1.71
   0   4  18   21.45    2.96
   0  -4  18   21.90    1.66
   0  -4 -18   19.74    3.03
   0   4  18   22.46    3.12
   0  -4  18   20.58    1.58
   0   4 -18   21.75    1.61
   0  -4  18   22.31    1.65
   0  -4  18   22.40    2.96
   0   4 -18   21.67    2.86
   0  -4 -18   22.24    1.52
   0   4 -18   21.32    1.61
   0   4 -18   22.20    1.59
   0  -4 -18   20.42    1.57
   0   4  18   23.42    3.15
   0  -4 -19  119.29    3.98
   0   4 -19  116.66    3.56
   0   4  19  132.23    7.74
   0  -4 -19  120.57    3.74
   0  -4  19  116.74    3.88
   0   4 -19  115.87    3.74
   0   4 -19  119.40    3.92
   0  -4  19  120.87    3.97
   0  -4  19  124.19    4.05
   0   4 -19  120.36    3.93
   0   4 -20  139.29    4.08
   0   4  20  148.50    8.31
   0  -4 -20  139.18    4.05
   0  -4 -20  144.63    4.42
   0   4 -20  147.79    4.40
   0  -4  20  139.14    4.31
   0  -4  20  134.78    4.21
   0  -4  20  138.26    4.35
   0   4 -20  138.98    3.94
   0   4 -20  138.22    4.29
   0   4  20  151.14    8.60
   0   4 -21    2.90    0.74
   0   4 -21    2.17    0.67
   0  -4  21    1.58    0.64
   0  -4 -21    2.62    0.67
   0   4 -21    2.18    0.66
   0   4  21    2.53    1.37
   0  -4  21    1.35    1.06
   0  -4  21    0.64    0.45
   0  -4 -21    2.36    0.72
   0  -4  22    2.41    1.39
   0  -4  22    2.20    0.58
   0   4  22    2.38    1.30
   0  -4 -22    2.09    0.70
   0  -4  22    1.71    0.58
   0   4 -22    1.63    0.50
   0   4 -22    1.80    0.59
   0   4 -22    1.98    0.63
   0   4  22    1.33    1.27
   0  -4 -22    1.52    0.51
   0  -4  23    0.67    1.06
   0  -4  23    2.18    0.66
   0   4 -23    2.02    0.60
   0  -4 -23    2.64    0.76
   0  -4  23    2.09    0.60
   0   4 -23    1.89    0.59
   0  -4  23    2.30    0.63
   0   4  23    4.56    1.67
   0  -4 -23    3.17    0.69
   0  -4  24    5.28    0.77
   0  -4  24    4.42    0.72
   0   4 -24    6.72    0.88
   0  -4 -24    5.42    0.71
   0  -4 -24    5.72    0.81
   0   4  24    5.56    1.67
   0  -4  24    4.74    0.77
   0   4 -24    5.59    0.81
   0  -4 -25   56.46    2.25
   0  -4  25   56.67    2.21
   0  -4  25   62.19    2.29
   0  -4  25   57.67    2.28
   0   4 -25   58.86    2.31
   0   4  25   61.04    2.09
   0  -4  25   56.19    2.00
   0   4 -26    0.35    0.38
   0   4  26    0.34    0.33
   0  -4  26    0.55    0.31
   0  -4  26    0.68    0.37
   0  -4 -26    0.70    0.37
   0  -4  26    0.55    0.40
   0   4 -27   97.80    2.58
   0  -4  27  102.81    2.48
   0  -4 -27   99.72    2.59
   0  -4  27   93.92    2.42
   0   4  28   98.69    2.24
   0  -4 -28   97.39    2.24
   0   4 -28   95.72    2.26
   0  -5   0   -0.01    0.45
   0   5   0   -0.11    0.46
   0  -5   0    0.05    0.48
   0   5   0   -0.26    0.55
   0  -5  -1  387.52    8.94
   0   5   1  387.06    8.65
   0  -5   1  373.15    8.46
   0  -5   1  369.56    8.95
   0  -5  -1  384.03    8.95
   0   5  -1  374.02    9.22
   0   5   1  366.83    8.12
   0   5  -1  376.95    8.80
   0   5  -1  366.86    8.62
   0  -5   1  391.98    8.77
   0   5  -1  375.21    8.16
   0   5  -2   51.18    2.91
   0   5  -2   48.66    2.91
   0  -5  -2   49.85    2.98
   0   5   2   50.36    1.77
   0  -5   2   47.10    2.70
   0   5  -2   52.59    3.17
   0  -5   2   52.02    2.74
   0   5   2   47.68    2.67
   0  -5  -2   48.13    2.94
   0  -5   2   49.33    2.98
   0  -5   3   74.47    3.24
   0   5   3   80.83    2.53
   0   5   3   74.02    3.35
   0  -5  -3   74.31    3.77
   0   5  -3   73.37    3.63
   0  -5   3   76.91    3.82
   0   5  -3   77.62    3.91
   0  -5  -3   75.89    3.78
   0  -5   3   80.73    3.49
   0   5   3   77.64    2.36
   0   5  -4  916.07   16.93
   0  -5   4  920.12   15.25
   0  -5  -4  826.89   16.16
   0   5  -4  912.11   16.72
   0  -5   4  838.42   14.59
   0  -5  -4  907.25   16.67
   0  -5   4  915.97   16.65
   0   5  -4  909.84   16.41
   0   5   4  873.25   13.04
   0   5   4  923.85   13.61
   0   5  -5   49.81    3.17
   0   5   5   50.19    2.15
   0  -5   5   48.22    3.19
   0  -5   5   47.98    2.44
   0   5  -5   51.25    3.27
   0  -5   5   49.67    2.67
   0  -5   5   51.59    2.08
   0  -5  -5   51.89    2.67
   0  -5  -5   49.93    3.26
   0   5  -5   50.10    3.19
   0   5  -5   48.76    3.30
   0  -5  -5   52.16    3.30
   0   5   5   52.92    2.41
   0  -5  -6  116.23    5.12
   0   5  -6  116.20    5.08
   0  -5   6  117.54    3.76
   0  -5   6  122.31    5.28
   0  -5   6  120.32    3.66
   0   5  -6  113.51    4.94
   0   5   6  116.04    4.00
   0  -5  -6  116.69    5.21
   0   5   6  116.53    3.68
   0  -5  -6  119.90    4.47
   0   5  -6  113.83    5.27
   0  -5   6  121.40    4.27
   0   5  -7   40.44    2.94
   0   5   7   40.48    2.25
   0   5   7   43.89    2.54
   0  -5   7   42.94    2.49
   0  -5  -7   44.37    3.20
   0   5  -7   38.25    3.10
   0  -5   7   41.28    3.13
   0   5   7   44.69    2.34
   0  -5  -7   40.57    2.72
   0   5  -7   40.45    3.01
   0  -5   7   40.06    2.21
   0  -5  -7   43.36    3.24
   0  -5   8  638.28   14.60
   0   5   8  638.60   12.05
   0  -5  -8  663.21   13.69
   0  -5   8  652.15   12.06
   0  -5  -8  657.32   14.53
   0  -5  -8  667.48   14.89
   0   5   8  664.48   12.78
   0  -5   8  652.42   12.04
   0   5  -8  647.19   13.83
   0   5  -8  633.37   14.86
   0   5   9   42.22    2.85
   0  -5   9   42.62    3.41
   0   5   9   41.60    3.15
   0  -5  -9   44.16    3.47
   0   5  -9   43.46    3.51
   0  -5  -9   43.08    3.19
   0  -5  -9   43.90    3.40
   0   5  -9   43.09    3.42
   0  -5   9   39.75    2.55
   0   5  -9   39.73    3.04
   0   5 -10  306.88    9.07
   0  -5 -10  296.70    9.29
   0   5  10  315.42    9.49
   0  -5 -10  305.66    9.93
   0  -5  10  306.13    8.23
   0  -5  10  306.01   10.03
   0   5  10  314.04    8.86
   0   5  10  311.74    8.74
   0   5 -10  310.49   10.26
   0   5 -10  303.39    9.88
   0  -5 -10  310.13    9.73
   0   5  11  132.38    5.70
   0   5 -11  131.50    6.51
   0  -5  11  131.29    6.58
   0  -5 -11  138.10    6.35
   0   5 -11  137.91    5.85
   0   5  11  139.18    5.72
   0  -5  11  130.54    5.36
   0   5  11  133.54    6.13
   0   5 -11  131.65    6.69
   0   5 -12  587.57   15.77
   0  -5  12  573.04   13.30
   0   5  12  617.15   14.90
   0  -5 -12  586.19   15.00
   0   5 -12  591.37   15.46
   0   5  12  594.56   13.98
   0   5  12  610.61   15.50
   0   5  12  616.36   13.65
   0  -5  12  586.34   15.57
   0   5 -13  705.31   17.60
   0   5  13  718.83   16.79
   0  -5  13  689.32   17.68
   0   5  13  714.42   17.65
   0   5  13  690.21   16.00
   0  -5 -13  696.34   17.17
   0   5 -13  724.65   18.22
   0   5  14  370.20   11.79
   0   5 -14  379.55   12.58
   0  -5  14  355.20    7.29
   0  -5  14  383.13   12.81
   0   5  14  357.33   12.59
   0  -5 -14  364.23   12.17
   0   5  14  361.40   11.19
   0   5 -14  357.74   12.60
   0   5  14  366.60   12.39
   0   5 -14  368.53    7.22
   0  -5 -14  358.20    7.30
   0   5 -15    0.06    0.48
   0  -5  15    0.68    0.54
   0   5 -15    0.14    0.44
   0   5  15    0.77    1.06
   0  -5  15    0.72    0.53
   0  -5  15    1.50    1.10
   0   5  15    1.73    1.15
   0  -5 -15    0.89    0.45
   0   5 -15   -0.08    0.45
   0   5 -15   -0.47    1.05
   0   5  15    1.80    1.34
   0  -5 -15    0.39    0.95
   0   5 -15    0.61    0.90
   0  -5  15    1.61    0.57
   0  -5 -15    0.28    0.48
   0  -5 -15    0.70    0.51
   0   5  15    0.41    0.85
   0  -5  16  257.92   10.98
   0   5 -16  250.13    5.97
   0   5  16  267.07   10.33
   0  -5 -16  256.61   10.71
   0   5  16  265.75   10.06
   0  -5 -16  264.50    6.15
   0  -5 -16  266.56    5.72
   0  -5  16  249.67    5.95
   0   5  16  249.50   10.70
   0   5 -16  255.47    5.95
   0  -5  16  261.02    6.12
   0   5 -16  261.63    6.04
   0   5  16  264.41   10.69
   0   5  16  271.32   11.43
   0  -5 -16  256.09    5.97
   0   5  17   14.87    2.50
   0   5 -17   15.10    1.33
   0  -5 -17   14.31    1.19
   0   5  17   12.64    2.47
   0   5  17   15.96    2.54
   0  -5  17   12.85    1.29
   0  -5 -17   14.44    1.35
   0   5 -17   12.90    1.23
   0  -5 -17   15.36    2.72
   0  -5  17   13.54    1.31
   0  -5  17   15.37    2.84
   0   5  17   14.96    2.54
   0   5 -17   13.39    1.28
   0   5  18   15.04    2.72
   0   5 -18   17.47    1.47
   0   5 -18   16.91    1.43
   0  -5  18   17.25    3.03
   0   5 -18   16.98    1.42
   0  -5  18   15.84    1.39
   0  -5 -18   16.88    1.51
   0  -5  18   16.11    1.44
   0   5  18   16.84    2.82
   0   5  18   17.37    2.66
   0  -5 -18   17.13    1.31
   0   5  19  195.33    8.95
   0   5 -19  179.88    4.97
   0  -5  19  179.81    4.96
   0  -5  19  184.64    5.10
   0   5 -19  181.37    4.89
   0  -5 -19  185.43    5.11
   0  -5  19  184.60    9.57
   0   5 -19  187.68    5.06
   0   5  19  191.08    9.37
   0   5 -20  361.68    7.57
   0  -5  20  343.85    7.42
   0  -5  20  356.64    7.61
   0  -5  20  355.24   13.56
   0   5 -20  349.84    7.28
   0   5 -20  359.34    7.56
   0   5  20  376.90   13.92
   0   5  20  381.98   13.52
   0  -5 -20  372.11    7.76
   0  -5  21   57.64    2.63
   0  -5 -21   58.74    2.67
   0   5 -21   63.16    2.72
   0   5  21   57.20    5.03
   0  -5  21   61.35    5.37
   0   5 -21   55.11    2.40
   0   5 -21   59.57    2.63
   0  -5  21   56.42    2.54
   0  -5 -22    2.99    0.73
   0   5  22    2.39    1.13
   0   5  22    4.91    2.00
   0   5 -22    2.79    0.72
   0   5 -22    3.36    0.63
   0  -5  22    3.55    1.67
   0   5 -22    3.42    0.71
   0  -5  22    3.17    0.69
   0  -5  22    2.51    0.65
   0  -5 -23    0.53    0.50
   0   5 -23   -0.01    0.37
   0   5  23    0.66    1.12
   0  -5  23    0.53    0.46
   0   5 -23    0.92    0.51
   0  -5  23    1.01    0.62
   0  -5  23    0.77    0.40
   0   5 -23    2.56    0.63
   0  -5  24    0.88    0.42
   0  -5 -24   -0.12    0.42
   0  -5  24    0.16    0.36
   0   5 -24    0.32    0.39
   0   5 -24    0.43    0.39
   0   5 -25  180.04    4.16
   0  -5 -25  178.78    4.15
   0  -5  25  182.18    4.11
   0  -5  25  171.50    3.91
   0  -5  26    0.01    0.27
   0  -5  26    0.44    0.33
   0   5 -26    0.22    0.31
   0  -5 -26    0.13    0.31
   0   5 -27   23.48    1.09
   0  -5  27   23.58    1.01
   0  -5 -27   24.79    1.11
   0   6   0 3240.92   45.51
   0   6   0 3188.38   44.11
   0   6   0 3156.03   43.83
   0   6   0 3160.35   42.88
   0  -6   0 3175.97   44.35
   0  -6   0 3081.00   43.93
   0  -6   1   78.93    3.88
   0  -6   1   76.32    3.93
   0  -6  -1   77.97    4.08
   0  -6  -1   82.09    4.20
   0   6   1   79.38    4.30
   0   6  -1   77.34    3.93
   0   6  -1   76.67    4.28
   0   6  -1   80.05    4.06
   0   6   1   75.47    3.87
   0   6   1   77.78    3.63
   0  -6   2   95.87    4.38
   0   6   2   93.77    4.25
   0  -6  -2   98.79    4.73
   0  -6   2   91.81    4.12
   0  -6   2   91.78    4.50
   0   6   2   92.42    4.00
   0   6  -2   95.74    4.82
   0  -6  -2   90.79    4.48
   0   6  -2   89.98    4.33
   0  -6  -3   85.43    4.50
   0   6  -3   84.44    4.29
   0   6   3   84.76    4.01
   0  -6   3   84.19    3.83
   0   6  -3   88.49    4.66
   0  -6   3   86.41    4.44
   0  -6  -3   91.70    4.60
   0  -6   3   89.26    4.18
   0  -6  -4    2.65    0.91
   0  -6   4    3.97    0.95
   0   6   4    3.81    0.94
   0   6  -4    4.13    1.12
   0   6  -4    2.86    0.98
   0   6  -4    3.65    1.14
   0  -6  -4    4.13    1.11
   0  -6   4    2.81    0.73
   0   6  -4    2.89    0.86
   0  -6   4    3.98    1.04
   0   6  -5  314.76    9.61
   0   6   5  314.11    8.36
   0  -6   5  311.69    7.66
   0   6  -5  316.63    9.45
   0  -6  -5  310.56    9.50
   0  -6   5  328.98    8.40
   0   6  -5  315.04    9.52
   0  -6   5  320.60    9.44
   0   6  -5  308.80    9.20
   0  -6  -5  314.68    9.46
   0   6  -6 1489.50   26.29
   0   6   6 1478.43   23.64
   0  -6  -6 1475.54   26.08
   0  -6  -6 1517.97   26.03
   0  -6   6 1450.25   25.62
   0   6  -6 1470.19   25.67
   0  -6   6 1496.61   23.48
   0   6  -6 1452.48   25.70
   0  -6  -7  310.82    9.80
   0  -6   7  306.63    9.69
   0   6  -7  300.26    9.92
   0   6  -7  310.15    9.56
   0  -6   7  318.11    8.16
   0   6  -7  307.50    9.66
   0  -6  -7  297.57    9.78
   0   6  -8    0.97    0.86
   0  -6  -8    0.67    0.58
   0  -6  -8    2.31    1.05
   0  -6  -8    1.65    1.13
   0   6  -8    2.93    1.18
   0  -6   8    2.68    1.03
   0   6  -9  326.96   10.62
   0   6   9  314.79   10.00
   0   6  -9  319.47   10.82
   0  -6  -9  335.58    9.62
   0   6  -9  316.03    9.90
   0  -6  -9  331.82   10.56
   0  -6  -9  307.16   10.48
   0  -6   9  303.03   10.21
   0  -6 -10   28.39    2.80
   0   6  10   26.65    2.82
   0  -6 -10   31.96    3.23
   0   6 -10   27.26    2.86
   0   6  10   29.46    2.83
   0  -6 -10   28.48    3.15
   0  -6  10   27.92    3.13
   0   6 -10   29.89    3.22
   0   6 -10   30.47    3.32
   0   6 -11   49.75    3.84
   0   6  11   51.94    4.04
   0   6 -11   54.52    4.40
   0  -6 -11   51.70    3.90
   0   6  11   54.74    3.81
   0  -6  11   45.84    4.06
   0   6 -11   52.33    4.46
   0   6 -12  279.58   10.61
   0  -6 -12  269.42    9.77
   0   6  12  281.99   10.43
   0  -6  12  268.64   10.36
   0   6 -12  267.11    9.26
   0   6  12  269.39    9.86
   0   6 -12  269.56   10.68
   0  -6  13   16.26    1.27
   0   6  13   15.12    2.43
   0  -6 -13   17.71    1.34
   0   6 -13   14.43    2.62
   0  -6  13   14.04    1.25
   0  -6 -13   15.15    1.19
   0   6  13   14.78    2.27
   0  -6 -13   16.91    2.51
   0  -6 -13   15.89    1.33
   0  -6  13   16.65    2.58
   0   6 -13   16.11    1.27
   0   6 -13   14.69    1.24
   0   6 -13   16.66    2.62
   0   6 -14  338.40    6.99
   0  -6  14  334.17    6.99
   0   6  14  345.03   12.37
   0   6 -14  342.01    6.93
   0  -6  14  325.01   12.19
   0   6 -14  338.17    7.14
   0  -6 -14  328.12    7.06
   0  -6 -14  348.27    6.93
   0  -6  14  341.51    7.12
   0  -6 -14  345.38   12.05
   0  -6 -14  327.45    6.60
   0   6  14  342.05   11.64
   0   6 -14  338.57   12.43
   0   6  14  358.98   13.13
   0  -6  14  335.26    6.75
   0   6 -14  350.93   12.85
   0  -6 -15   35.23    3.81
   0   6  15   41.28    4.14
   0   6 -15   38.11    4.22
   0  -6  15   36.78    4.05
   0   6  15   36.30    4.01
   0   6 -15   35.73    2.06
   0  -6  15   35.70    2.04
   0  -6 -15   34.36    1.90
   0   6 -15   35.68    4.10
   0   6  15   40.23    4.43
   0  -6 -15   36.89    2.11
   0  -6  15   36.30    2.04
   0  -6 -15   33.67    1.80
   0   6 -15   36.77    2.02
   0   6 -15   34.95    1.95
   0  -6  15   34.79    1.86
   0   6 -16  667.58   11.40
   0   6  16  687.56   19.08
   0   6  16  689.46   18.54
   0  -6 -16  669.86   10.84
   0   6 -16  706.08   19.33
   0  -6 -16  675.21   11.20
   0  -6  16  655.46   11.56
   0  -6  16  655.11   11.42
   0  -6 -16  673.02   18.55
   0   6 -16  676.09   11.64
   0  -6  16  677.90   11.05
   0  -6 -16  666.22   11.63
   0   6 -16  672.20   11.53
   0  -6  16  660.04   18.84
   0   6  16  704.51   18.04
   0  -6  17   57.08    2.67
   0  -6 -17   55.21    2.64
   0   6 -17   60.39    2.67
   0   6  17   58.70    5.27
   0   6 -17   62.02    2.74
   0  -6 -17   60.75    2.53
   0   6  17   62.30    5.22
   0   6 -17   59.90    2.67
   0   6  17   64.25    5.08
   0  -6  17   57.48    5.21
   0  -6  17   58.15    2.62
   0   6  18    4.94    1.58
   0  -6  18    6.15    0.91
   0   6  18    8.32    2.00
   0   6 -18    5.33    0.93
   0  -6 -18    6.99    0.96
   0   6  18    7.51    2.06
   0   6 -18    6.27    0.95
   0  -6  18    6.37    0.96
   0  -6  18    5.85    1.85
   0   6 -18    6.47    0.98
   0  -6 -18    6.56    1.05
   0  -6  19   48.23    2.36
   0   6 -19   49.81    2.40
   0   6 -19   47.54    2.35
   0   6  19   44.14    4.41
   0  -6  19   44.06    4.60
   0  -6 -19   46.79    2.41
   0   6 -19   51.41    2.45
   0  -6  19   47.04    2.38
   0  -6 -19   47.81    2.17
   0  -6 -20    4.12    0.68
   0   6 -20    5.72    0.84
   0   6 -20    5.36    0.84
   0  -6  20    5.31    0.83
   0  -6 -20    4.73    0.82
   0   6  20    4.95    1.57
   0  -6  20    4.90    0.87
   0  -6  20    6.29    0.96
   0  -6  20    4.29    1.65
   0   6 -20    5.36    0.85
   0  -6  21   28.52    1.72
   0   6 -21   30.74    1.82
   0  -6 -21   30.02    1.86
   0  -6  21   28.76    1.83
   0   6  21   28.36    3.48
   0   6 -21   31.55    1.78
   0  -6  21   26.29    3.39
   0   6 -21   29.41    1.79
   0  -6 -22   40.67    2.05
   0  -6  22   39.19    2.03
   0   6  22   42.81    4.26
   0   6 -22   37.35    1.82
   0   6 -22   42.00    2.06
   0   6 -22   37.35    1.92
   0  -6  22   36.45    1.84
   0  -6 -23    2.16    0.56
   0   6 -23    1.86    0.54
   0  -6  23    1.72    0.54
   0  -6  23    1.74    0.54
   0   6 -23    2.53    0.60
   0   6 -23    1.19    0.40
   0  -6  24  170.26    4.01
   0   6 -24  163.63    3.93
   0   6 -24  166.17    3.98
   0  -6 -24  171.52    4.04
   0  -6  24  155.60    3.64
   0  -6  25   37.94    1.58
   0  -6 -25   39.22    1.64
   0   6 -25   38.14    1.62
   0   6 -26   10.46    0.76
   0  -6 -26   10.29    0.76
   0  -6  26   10.50    0.72
   0  -6 -27  153.98    2.86
   0   6 -27  152.68    2.86
   0  -7   0    1.27    0.72
   0   7   0    0.24    0.59
   0  -7   0    0.40    0.85
   0   7   0    0.03    0.62
   0   7   0    0.06    0.71
   0   7   1  610.64   13.72
   0   7  -1  596.19   13.59
   0   7   1  613.28   12.78
   0   7   1  601.86   14.67
   0  -7  -1  622.98   14.38
   0  -7   1  581.30   13.43
   0   7   1  597.61   13.33
   0   7  -1  593.99   14.74
   0  -7  -1  615.98   14.17
   0  -7   1  622.81   14.06
   0   7  -2   82.37    4.54
   0   7   2   81.85    4.41
   0   7  -2   81.26    4.96
   0  -7  -2   90.63    4.99
   0  -7  -2   86.94    4.85
   0   7   2   87.02    5.07
   0  -7   2   86.75    4.65
   0   7  -2   82.99    4.97
   0  -7   2   82.00    4.34
   0   7   2   90.68    4.27
   0   7   3  259.14    8.99
   0  -7   3  250.53    7.78
   0   7  -3  258.13    8.87
   0   7  -3  253.31    9.03
   0  -7   3  259.69    8.29
   0   7  -3  262.05    9.17
   0  -7   3  246.27    8.50
   0   7  -3  243.70    8.33
   0   7   3  251.17    8.03
   0  -7  -3  263.78    9.00
   0  -7  -3  254.99    8.78
   0   7   3  258.93    7.71
   0   7  -4  409.84   11.36
   0   7   4  412.52   10.72
   0   7   4  424.90   11.90
   0  -7   4  406.68   10.14
   0  -7   4  422.71   10.86
   0   7  -4  417.10   12.10
   0  -7  -4  437.99   12.20
   0   7   4  421.25   10.46
   0  -7  -4  414.28   11.83
   0   7  -4  424.84   12.18
   0   7  -4  415.94   11.90
   0  -7   4  412.62   11.57
   0  -7   5    3.39    1.13
   0   7  -5    1.92    1.00
   0   7  -5    1.62    0.83
   0   7   5    1.71    0.84
   0   7   5    1.17    0.59
   0  -7  -5    1.64    0.98
   0  -7   5    2.73    1.15
   0   7  -5    3.11    1.18
   0   7  -5    2.78    1.17
   0  -7  -5    1.51    0.77
   0   7  -6  315.75   10.54
   0  -7  -6  334.38   10.70
   0   7  -6  304.72   10.48
   0   7   6  312.58    9.10
   0  -7   6  317.31   10.29
   0  -7   6  330.41    9.18
   0   7  -6  320.08   10.53
   0  -7  -6  315.98   10.67
   0   7   6  321.95   10.18
   0   7  -7  160.03    7.56
   0   7   7  163.16    7.03
   0  -7   7  157.22    7.20
   0  -7  -7  168.44    7.54
   0   7   7  160.39    6.16
   0   7  -7  169.89    7.49
   0  -7  -7  161.09    7.57
   0   7   8  280.88    9.43
   0  -7  -8  290.57   10.30
   0  -7   8  267.01    9.80
   0  -7  -8  280.44   10.38
   0   7  -8  277.05   10.36
   0   7  -8  280.32    9.96
   0   7  -9  320.81   11.50
   0  -7  -9  331.37   11.37
   0   7   9  339.76   10.38
   0  -7   9  317.11   11.04
   0  -7  -9  309.50   11.33
   0   7  -9  320.26   10.86
   0   7  -9  314.04   11.22
   0   7  10   20.99    2.52
   0   7 -10   16.94    2.49
   0  -7 -10   20.50    1.45
   0  -7 -10   20.74    2.81
   0   7  10   18.16    2.54
   0  -7 -10   18.75    2.76
   0   7 -10   19.37    2.92
   0   7 -10   19.20    2.72
   0  -7  10   19.17    1.49
   0  -7  10   18.60    2.72
   0  -7 -11   50.10    2.27
   0   7 -11   52.03    2.23
   0   7 -11   51.56    4.23
   0   7  11   52.44    4.04
   0  -7 -11   52.86    2.35
   0  -7 -11   48.76    2.21
   0  -7  11   49.98    2.27
   0   7 -11   53.68    4.76
   0   7 -11   52.65    4.68
   0   7 -11   52.73    2.28
   0   7  11   56.41    4.52
   0  -7  11   46.47    4.27
   0  -7  11   50.98    2.45
   0  -7  12  157.95    8.16
   0  -7  12  160.04    4.62
   0   7  12  149.77    7.63
   0  -7 -12  156.72    4.22
   0   7  12  160.89    8.53
   0  -7 -12  147.01    4.26
   0   7 -12  153.92    4.16
   0   7 -12  161.67    4.34
   0   7 -12  166.35    8.67
   0  -7  12  158.98    4.34
   0  -7  12  152.95    4.27
   0  -7 -12  161.68    4.41
   0   7 -12  159.41    8.35
   0   7 -12  147.60    7.20
   0   7  13   36.06    3.84
   0   7 -13   40.69    2.07
   0  -7  13   40.63    2.26
   0  -7 -13   40.01    2.09
   0   7 -13   43.62    4.49
   0  -7 -13   38.45    2.09
   0  -7  13   39.44    2.07
   0  -7  13   38.90    2.06
   0   7 -13   38.60    1.99
   0   7  13   41.32    4.00
   0   7  13   41.69    4.43
   0  -7  13   39.91    4.15
   0   7 -13   36.99    4.11
   0  -7 -13   38.33    2.00
   0  -7 -14  137.15    4.04
   0  -7 -14  127.22    3.77
   0  -7  14  130.25    3.90
   0   7 -14  129.51    3.87
   0  -7  14  129.22    4.25
   0   7 -14  128.57    7.88
   0   7 -14  132.04    4.02
   0   7  14  130.31    7.58
   0   7 -14  136.58    8.02
   0  -7  14  123.16    7.43
   0  -7  14  130.23    3.94
   0  -7 -14  124.88    4.00
   0   7  14  133.22    7.37
   0  -7  15   -0.19    0.40
   0   7 -15    0.59    0.60
   0   7  15    0.36    0.90
   0   7  15    0.92    0.78
   0  -7 -15    0.00    0.48
   0  -7  15   -0.75    1.10
   0   7 -15    0.64    1.05
   0  -7  15    0.52    0.51
   0   7 -15    0.21    0.48
   0   7 -15   -0.30    0.54
   0  -7 -15    0.72    0.67
   0  -7 -15   -0.32    0.51
   0  -7  15    0.78    0.57
   0  -7  16   35.66    4.14
   0   7 -16   40.14    2.14
   0  -7 -16   37.66    2.04
   0  -7 -16   38.26    1.92
   0   7  16   41.20    4.48
   0   7 -16   40.42    2.11
   0  -7  16   38.86    2.01
   0   7 -16   41.02    2.25
   0   7  16   41.21    4.27
   0  -7 -16   38.29    2.17
   0   7  16   41.20    3.95
   0  -7  16   40.13    2.31
   0  -7  16   35.59    2.01
   0  -7 -17   48.31    2.15
   0  -7  17   51.79    2.40
   0  -7  17   51.01    2.24
   0   7 -17   51.15    2.43
   0   7 -17   52.93    2.55
   0   7  17   55.15    4.83
   0  -7 -17   50.77    2.35
   0  -7 -17   47.67    2.43
   0   7 -17   48.56    2.34
   0   7  17   51.49    4.99
   0  -7  17   47.71    4.70
   0  -7  17   49.65    2.59
   0   7 -18    0.36    0.43
   0  -7 -18    0.73    0.50
   0  -7  18    0.10    0.45
   0   7  18    1.28    1.29
   0   7 -18   -0.57    0.53
   0   7 -18   -0.02    0.43
   0  -7  18   -0.23    1.13
   0  -7 -18    1.18    0.61
   0   7 -18   -0.07    0.43
   0  -7  18    0.03    0.43
   0  -7  19   12.57    1.16
   0  -7 -19   14.54    1.34
   0   7  19   12.99    2.27
   0   7 -19   15.09    1.30
   0  -7  19   13.22    1.31
   0  -7  19   13.27    2.60
   0   7 -19   14.80    1.31
   0   7 -19   12.74    1.17
   0  -7 -19   13.88    1.17
   0   7  20   50.31    4.47
   0   7 -20   56.07    2.43
   0   7 -20   52.37    2.32
   0  -7  20   51.29    2.23
   0  -7  20   54.38    2.50
   0   7 -20   51.14    2.33
   0  -7 -20   53.87    2.43
   0  -7 -20   52.74    2.19
   0  -7  20   48.17    4.50
   0  -7 -21   41.02    2.04
   0  -7  21   40.67    2.07
   0   7 -21   39.60    1.90
   0   7  21   42.98    4.21
   0   7 -21   39.44    1.97
   0   7 -21   41.15    1.99
   0  -7  21   39.01    1.83
   0  -7 -21   40.94    1.82
   0   7 -22    2.14    0.55
   0   7 -22    2.48    0.60
   0  -7 -22    1.23    0.40
   0  -7  22    2.13    0.56
   0  -7 -22    1.84    0.53
   0   7 -22    2.42    0.56
   0  -7  23    4.38    0.68
   0   7 -23    5.03    0.67
   0   7 -23    5.32    0.69
   0  -7 -23    4.63    0.67
   0   7 -23    4.24    0.55
   0  -7 -24    8.05    0.76
   0   7 -24    9.25    0.80
   0  -7  24    9.52    0.81
   0   7 -25   76.02    2.10
   0  -7  25   77.52    2.10
   0  -7 -25   77.03    2.11
   0  -7 -26   21.96    0.89
   0   7 -26   21.03    0.87
   0   8   0 1998.35   32.73
   0   8   0 2018.67   35.19
   0  -8   0 1982.69   33.37
   0   8   0 2070.90   35.51
   0  -8   0 2035.23   34.07
   0   8   1    6.63    1.63
   0  -8  -1    7.40    1.61
   0   8  -1    6.17    1.58
   0   8   1    5.47    1.24
   0  -8  -1    6.99    1.64
   0   8  -1    7.05    1.75
   0   8  -1    6.18    1.33
   0   8   1    7.27    1.63
   0  -8   1    7.11    1.53
   0  -8   1    6.61    1.60
   0   8  -2  479.82   13.97
   0   8  -2  464.16   13.85
   0   8  -2  473.31   12.72
   0  -8   2  453.28   12.14
   0  -8  -2  478.80   13.52
   0   8   2  467.09   13.73
   0   8  -2  486.74   13.41
   0  -8   2  465.37   12.79
   0   8   2  476.72   12.59
   0   8   2  467.03   12.12
   0  -8  -2  465.91   13.11
   0  -8  -3  241.19    9.36
   0   8   3  246.21    8.31
   0   8  -3  241.79    8.84
   0   8   3  243.05    8.53
   0   8  -3  239.18    9.23
   0   8  -3  244.27    9.68
   0  -8   3  246.37    8.77
   0   8  -3  233.60    9.48
   0  -8  -3  240.75    9.19
   0  -8   3  238.76    8.16
   0   8   3  233.18    9.37
   0   8   4  330.88   10.11
   0   8  -4  322.14   10.65
   0   8   4  329.47   11.23
   0   8  -4  326.49   11.40
   0   8  -4  329.61   11.22
   0   8  -4  330.16   11.54
   0  -8   4  333.12   10.29
   0  -8  -4  336.42   11.20
   0  -8  -4  328.70   11.32
   0   8   5    0.02    0.78
   0  -8   5    1.41    1.02
   0   8   5    1.79    0.90
   0   8  -5   -0.11    0.75
   0  -8  -5    0.09    0.81
   0   8  -5    1.96    1.19
   0   8  -5   -0.28    0.66
   0  -8   5    0.48    0.81
   0  -8  -5   -0.21    0.78
   0  -8  -6    1.59    1.30
   0  -8   6    1.93    0.97
   0  -8  -6    1.12    0.91
   0   8  -6    1.13    0.81
   0   8  -6    2.80    1.26
   0   8   6    1.36    0.87
   0   8  -7   -0.11    0.98
   0  -8  -7   -0.08    0.78
   0  -8  -7    0.09    0.91
   0   8  -7    0.62    0.98
   0  -8   7    0.35    0.42
   0  -8   7   -0.02    0.82
   0  -8  -7    0.57    0.51
   0   8   7   -0.41    1.02
   0  -8  -7    0.59    0.39
   0  -8   7    0.28    0.44
   0   8   8  424.81   12.89
   0  -8  -8  422.64   14.03
   0  -8  -8  428.81    8.12
   0   8  -8  424.72   13.55
   0  -8   8  416.04   13.16
   0  -8   8  427.31    8.34
   0  -8   8  415.21    8.09
   0  -8  -8  422.18    8.02
   0  -8   8  423.49    7.77
   0  -8  -8  434.82   13.87
   0   8  -8  435.39   13.89
   0   8  -8  423.50   13.85
   0   8   8  433.92   13.10
   0  -8  -9    2.54    0.68
   0  -8  -9    4.17    0.79
   0   8  -9    3.01    1.42
   0  -8   9    2.61    0.67
   0  -8  -9    4.02    1.49
   0  -8   9    4.53    1.51
   0  -8  -9    3.20    0.69
   0  -8   9    4.14    0.79
   0   8   9    3.12    1.13
   0   8  -9    3.98    0.72
   0   8  -9    4.41    1.32
   0  -8   9    3.53    0.73
   0   8  -9    5.29    1.66
   0   8  -9    4.19    1.82
   0   8   9    3.42    1.17
   0   8   9    4.26    1.55
   0  -8  -9    2.49    1.15
   0  -8  10   93.66    6.16
   0  -8 -10   94.53    6.57
   0   8 -10   93.71    6.47
   0   8 -10   93.53    3.13
   0  -8 -10   94.02    3.28
   0   8  10  100.56    6.03
   0   8  10   91.67    6.34
   0  -8  10   95.13    3.33
   0  -8 -10   88.21    3.10
   0  -8  10   97.26    3.52
   0   8 -10   86.53    5.86
   0  -8 -10   94.57    3.25
   0   8  10   95.90    6.23
   0   8 -10   98.81    6.60
   0   8 -11   18.59    3.02
   0  -8  11   19.04    1.55
   0  -8  11   17.01    2.75
   0  -8 -11   19.08    1.46
   0  -8 -11   20.38    1.54
   0  -8 -11   19.21    1.47
   0   8 -11   18.28    1.38
   0  -8  11   16.83    1.41
   0   8 -11   20.21    3.17
   0   8  11   20.28    2.87
   0   8 -11   19.09    1.37
   0   8 -11   18.37    2.81
   0   8  11   16.46    2.65
   0  -8  12   12.04    1.29
   0   8 -12    9.79    2.31
   0   8 -12   10.29    2.33
   0   8  12   13.12    2.32
   0   8 -12   12.39    1.14
   0  -8  12   13.13    1.28
   0  -8 -12   12.44    1.17
   0  -8 -12   13.37    1.24
   0   8 -12   13.11    2.35
   0   8 -12   12.23    1.12
   0  -8  12   11.86    2.30
   0   8  12   12.48    2.44
   0  -8 -12   12.45    1.24
   0   8 -13    1.30    1.37
   0  -8 -13    3.21    0.73
   0  -8  13    1.42    0.79
   0   8 -13    3.01    0.68
   0   8 -13    3.00    0.69
   0  -8 -13    4.00    0.81
   0   8  13    0.61    0.96
   0  -8 -13    2.88    0.69
   0  -8  13    2.66    0.64
   0  -8  13    2.20    0.64
   0  -8 -14  130.10    4.03
   0  -8  14  121.79    7.44
   0  -8  14  130.40    4.29
   0   8 -14  137.78    4.29
   0   8  14  132.25    7.76
   0   8 -14  129.61    3.97
   0   8 -14  130.05    3.83
   0  -8 -14  128.66    3.87
   0  -8  14  128.39    3.96
   0   8 -14  137.15    8.28
   0  -8 -14  130.01    4.03
   0   8 -15  221.30    5.66
   0  -8  15  216.65    5.31
   0   8  15  223.68   10.26
   0  -8 -15  213.98    5.19
   0   8 -15  217.10    5.22
   0   8 -15  218.79    5.38
   0  -8 -15  218.56    5.43
   0  -8 -15  215.64    5.45
   0  -8  15  211.42    5.69
   0  -8  15  211.91   10.00
   0   8 -15  219.73   10.66
   0   8 -16   73.31    2.90
   0  -8  16   70.20    5.60
   0   8 -16   74.25    2.81
   0  -8 -16   73.16    2.95
   0   8  16   76.70    5.59
   0  -8  16   74.82    2.81
   0  -8 -16   72.43    2.73
   0  -8  16   74.74    3.14
   0  -8 -16   74.96    2.92
   0   8 -16   76.30    3.10
   0  -8  17    1.44    0.60
   0  -8 -17    2.09    0.63
   0  -8 -17    1.56    0.57
   0   8 -17    0.73    0.54
   0  -8  17    1.07    0.52
   0   8 -17    1.60    0.59
   0   8  17   -0.06    1.08
   0  -8  17    1.04    1.05
   0   8 -17    1.55    0.60
   0  -8 -17    2.37    0.64
   0  -8 -18  117.84    3.57
   0  -8  18  111.48    6.94
   0   8 -18  119.87    3.68
   0  -8  18  118.67    3.38
   0   8 -18  120.45    3.54
   0   8 -18  115.99    3.72
   0  -8  18  117.97    3.88
   0   8 -18  116.81    3.54
   0  -8 -18  117.07    3.70
   0  -8 -18  112.97    3.24
   0  -8 -19   25.27    1.37
   0   8 -19   23.70    1.41
   0   8 -19   24.35    1.56
   0  -8 -19   24.25    1.57
   0  -8 -19   24.11    1.48
   0  -8  19   26.69    1.73
   0   8 -19   24.84    1.61
   0   8 -19   25.35    1.54
   0  -8 -20   80.40    2.64
   0  -8 -20   84.36    2.88
   0   8 -20   80.24    2.70
   0  -8  20   80.22    2.93
   0   8 -20   81.58    2.78
   0   8 -20   79.22    2.76
   0   8 -21  108.18    3.10
   0   8 -21  104.47    2.99
   0   8 -21  102.97    3.00
   0  -8  21  105.75    3.21
   0  -8 -21  104.68    2.86
   0  -8 -21  105.76    3.10
   0  -8  22   38.57    1.74
   0   8 -22   36.49    1.61
   0  -8 -22   32.67    1.39
   0  -8 -22   37.12    1.65
   0   8 -22   35.23    1.52
   0   8 -22   37.21    1.58
   0   8 -23    1.51    0.40
   0  -8 -23    1.44    0.41
   0   8 -23    0.83    0.31
   0  -8  23    1.51    0.40
   0   8 -24    0.26    0.25
   0  -8  24    0.33    0.24
   0  -9   0    0.09    0.94
   0  -9   0    0.61    0.50
   0   9   0    0.67    0.85
   0  -9   0   -0.47    0.43
   0   9   0   -0.53    1.10
   0  -9   0   -0.06    0.42
   0  -9   0    0.23    0.49
   0  -9   0    0.27    0.82
   0   9   0    0.27    0.90
   0   9   0   -0.55    0.88
   0  -9   1    3.13    0.69
   0  -9  -1    4.01    0.73
   0  -9  -1    2.39    1.20
   0   9  -1    3.36    1.32
   0  -9  -1    3.45    0.65
   0   9   1    2.54    1.31
   0  -9   1    3.28    0.69
   0   9  -1    5.02    1.65
   0  -9  -1    6.01    0.84
   0   9   1    4.29    1.34
   0  -9  -1    3.92    0.81
   0   9  -1    2.45    1.14
   0  -9   1    4.80    1.31
   0   9  -1    3.40    1.31
   0  -9  -1    3.87    1.48
   0  -9   1    4.06    0.77
   0   9   1    3.47    1.51
   0  -9   1    4.48    0.74
   0  -9   1    3.23    1.30
   0  -9  -2   17.70    1.40
   0   9  -2   18.60    2.89
   0  -9   2   18.09    1.45
   0  -9  -2   17.30    2.72
   0  -9  -2   18.49    1.46
   0  -9  -2   17.33    1.32
   0  -9   2   18.06    1.28
   0  -9   2   18.57    2.63
   0  -9  -2   21.12    2.78
   0  -9   2   19.09    1.48
   0   9   2   15.14    2.64
   0  -9  -2   17.47    1.39
   0   9   2   17.26    2.78
   0   9  -2   19.91    2.75
   0   9  -2   16.60    2.38
   0  -9   2   19.12    1.45
   0   9  -2   18.89    2.82
   0  -9   3  153.14    4.30
   0   9   3  154.86    8.17
   0   9   3  144.76    7.86
   0  -9  -3  149.38    7.88
   0  -9  -3  147.77    3.97
   0   9  -3  152.92    7.78
   0  -9  -3  150.72    4.14
   0  -9  -3  151.65    4.30
   0  -9  -3  154.44    4.23
   0  -9   3  149.31    4.37
   0   9  -3  144.69    7.96
   0   9  -3  143.82    7.99
   0  -9   3  156.03    7.39
   0  -9   3  151.86    4.34
   0  -9  -3  147.55    7.57
   0  -9   4   68.03    2.71
   0  -9  -4   70.72    2.78
   0   9   4   63.05    5.15
   0   9  -4   66.51    5.35
   0   9  -4   62.23    5.20
   0  -9  -4   64.83    2.61
   0  -9  -4   61.05    5.06
   0   9   4   63.00    5.13
   0  -9  -4   60.65    2.46
   0  -9   4   62.51    2.73
   0  -9   4   63.21    2.70
   0  -9  -4   58.92    4.84
   0  -9  -4   64.62    2.61
   0   9  -4   65.32    5.10
   0  -9   5  101.98    3.56
   0  -9  -5  105.05    3.36
   0  -9  -5  105.90    6.81
   0   9  -5  100.01    6.56
   0  -9   5  100.18    3.49
   0  -9  -5  103.36    3.38
   0   9  -5  105.61    6.54
   0  -9  -5  105.54    3.44
   0   9   5  102.56    6.59
   0  -9  -5  103.56    6.54
   0   9   5  106.65    6.71
   0  -9   5  107.02    3.45
   0  -9   6   36.71    1.98
   0   9  -6   31.37    3.65
   0  -9  -6   34.02    1.91
   0   9   6   34.33    3.77
   0   9  -6   31.18    3.76
   0  -9   6   35.47    2.03
   0   9   6   31.24    3.66
   0  -9  -6   37.96    4.03
   0  -9   6   34.88    2.08
   0  -9  -6   36.83    1.97
   0  -9  -6   32.52    3.82
   0  -9  -6   36.11    1.90
   0  -9  -7    0.35    0.50
   0   9  -7    0.27    0.92
   0  -9   7    1.42    0.62
   0   9  -7   -0.98    1.04
   0  -9  -7    0.36    0.90
   0   9   7    0.72    0.89
   0  -9   7    1.48    0.64
   0  -9  -7   -1.22    1.34
   0  -9  -7    1.87    0.63
   0   9   7    0.04    0.98
   0  -9   7    0.56    0.53
   0  -9  -7    0.89    0.55
   0   9  -7    0.01    0.95
   0  -9  -8    2.97    0.69
   0  -9   8    1.94    0.65
   0   9  -8    1.35    1.08
   0   9   8    1.77    1.09
   0   9  -8    2.54    0.70
   0   9  -8    2.20    1.23
   0  -9  -8    3.02    1.34
   0  -9  -8    1.77    0.54
   0   9  -8    3.53    1.54
   0  -9   8    3.44    1.42
   0   9   8    0.95    0.84
   0  -9  -8    1.42    0.60
   0  -9   8    0.99    0.52
   0  -9   8    2.40    0.71
   0   9  -8    1.21    0.92
   0   9  -9   10.89    1.09
   0   9   9    9.98    1.90
   0  -9  -9   12.01    2.49
   0  -9   9   10.86    1.14
   0  -9  -9   11.20    1.13
   0  -9   9   10.94    1.12
   0  -9   9   11.55    2.27
   0  -9  -9   10.65    1.15
   0   9  -9   10.31    2.22
   0   9  -9   11.20    2.35
   0  -9   9   10.41    1.20
   0   9  -9   10.91    2.41
   0   9 -10    1.06    0.90
   0   9  10    0.39    1.16
   0  -9 -10    1.07    0.62
   0   9  10    0.59    0.97
   0  -9 -10    1.47    0.54
   0  -9 -10    1.14    0.54
   0  -9  10    2.40    1.14
   0  -9  10    1.10    0.58
   0  -9  10    0.85    0.54
   0   9 -10    1.26    0.56
   0   9 -10    2.53    1.24
   0  -9 -11    0.44    0.48
   0  -9  11    1.06    0.53
   0   9 -11    1.29    0.98
   0   9  11   -0.74    1.32
   0  -9 -11    1.65    0.64
   0   9 -11   -0.83    1.23
   0  -9  11    0.79    0.80
   0   9 -11    1.45    0.55
   0  -9  11    1.07    0.53
   0  -9 -11    1.03    0.58
   0  -9 -12    8.85    1.07
   0   9  12    6.26    1.26
   0  -9 -12    7.65    0.95
   0  -9 -12    7.52    0.96
   0   9 -12    8.03    0.93
   0   9 -12    6.82    1.81
   0  -9  12    8.16    1.10
   0  -9  12    8.20    2.02
   0  -9  12    7.05    0.97
   0   9 -12    5.59    1.81
   0  -9 -13    3.29    0.69
   0  -9  13    5.07    1.77
   0   9 -13    3.30    0.69
   0  -9 -13    3.81    0.78
   0  -9  13    3.71    0.78
   0  -9 -13    4.05    0.78
   0   9 -13    2.90    1.62
   0  -9  13    2.92    0.69
   0  -9  14   35.55    4.00
   0  -9 -14   36.14    1.98
   0  -9 -14   39.94    2.15
   0  -9 -14   35.98    1.97
   0   9 -14   36.23    2.14
   0  -9  14   35.48    1.99
   0   9 -14   35.81    1.91
   0  -9  14   39.55    2.26
   0   9 -14   38.77    4.42
   0   9 -14   35.68    1.85
   0   9 -15   43.31    2.28
   0  -9 -15   39.99    2.06
   0  -9  15   38.84    4.00
   0  -9  15   40.10    2.25
   0  -9 -15   38.70    1.98
   0   9 -15   40.78    1.95
   0  -9 -15   43.98    2.22
   0   9 -15   41.29    2.06
   0  -9  15   41.55    2.10
   0  -9  16  368.13    7.15
   0  -9  16  356.76   12.59
   0   9 -16  373.00    7.25
   0  -9 -16  370.38    7.37
   0   9 -16  359.49    6.93
   0  -9 -16  366.73    7.04
   0   9 -16  372.73    7.60
   0  -9 -16  356.39    7.17
   0  -9  16  371.27    7.72
   0  -9 -17  231.29    5.34
   0   9 -17  242.50    5.65
   0  -9  17  242.72    5.24
   0  -9 -17  236.22    5.13
   0   9 -17  241.37    5.37
   0   9 -17  239.28    5.16
   0  -9  17  239.35    5.76
   0  -9 -17  245.75    5.49
   0  -9  18   27.07    1.69
   0  -9  18   27.00    1.44
   0  -9 -18   25.67    1.40
   0   9 -18   27.74    1.56
   0   9 -18   28.66    1.67
   0   9 -18   28.33    1.59
   0  -9 -18   27.54    1.59
   0  -9 -18   27.56    1.56
   0   9 -18   27.08    1.49
   0   9 -19   19.72    1.27
   0  -9 -19   19.05    1.25
   0   9 -19   19.74    1.20
   0   9 -19   16.79    1.11
   0  -9  19   18.49    1.35
   0  -9 -19   18.69    1.11
   0   9 -19   21.47    1.38
   0  -9 -19   19.31    1.27
   0  -9  20    2.30    0.51
   0   9 -20    2.69    0.52
   0   9 -20    1.97    0.48
   0  -9 -20    1.61    0.42
   0  -9 -20    2.71    0.55
   0   9 -20    2.25    0.47
   0  -9 -21   15.98    0.99
   0   9 -21   16.50    1.02
   0  -9  21   16.97    1.11
   0  -9 -21   16.05    0.96
   0   9 -21   16.36    0.95
   0   9 -21   15.03    0.99
   0  -9 -22   83.73    2.16
   0   9 -22   81.81    2.10
   0   9 -22   83.49    2.18
   0  -9  22   83.66    2.34
   0   9 -23   36.49    1.18
   0  -9  23   36.12    1.29
   0  10   0   56.95    5.29
   0 -10   0   56.29    2.37
   0 -10   0   56.12    2.60
   0 -10   0   53.11    4.80
   0 -10   0   55.10    2.58
   0  10   0   52.40    5.06
   0  10   0   56.78    4.70
   0 -10   0   57.98    2.62
   0 -10   1   11.83    1.20
   0 -10  -1   11.21    1.20
   0 -10   1   11.21    1.17
   0 -10  -1   10.65    1.16
   0  10   1   11.12    2.38
   0 -10   1    8.09    1.85
   0  10  -1    8.55    2.27
   0 -10  -1    6.98    2.08
   0  10   1    8.15    1.92
   0  10  -1   10.12    2.12
   0 -10   1    9.02    0.94
   0 -10  -1   10.40    1.15
   0  10   1    7.27    2.15
   0 -10  -1   10.00    2.02
   0 -10  -1   10.96    1.08
   0  10  -1    8.66    2.16
   0 -10   1    9.32    1.12
   0 -10  -2    1.01    0.59
   0  10  -2    0.36    1.15
   0 -10  -2    0.25    1.19
   0 -10   2    0.91    0.53
   0  10   2   -0.01    1.00
   0 -10  -2    0.58    0.50
   0  10  -2    1.08    1.14
   0 -10  -2   -0.24    1.07
   0  10   2    0.74    1.06
   0 -10   2    1.22    0.61
   0 -10   2    0.07    0.52
   0 -10   2    0.27    0.46
   0  10   2   -0.40    0.90
   0 -10  -2    0.26    0.47
   0  10  -2    0.90    0.76
   0  10  -3  235.14   10.86
   0 -10  -3  233.25    5.34
   0 -10  -3  240.67    5.81
   0 -10   3  237.35    5.94
   0  10   3  239.38   10.92
   0 -10  -3  252.30   10.59
   0 -10  -3  240.15   10.73
   0 -10  -3  235.03    5.73
   0 -10   3  252.15    5.91
   0  10   3  243.21   10.94
   0  10   3  242.47    9.68
   0 -10  -3  236.51    5.62
   0 -10   3  235.82    5.86
   0  10  -3  243.60   10.39
   0  10  -4   85.33    6.11
   0 -10  -4   86.26    6.37
   0 -10  -4   86.48    3.05
   0 -10   4   86.56    3.31
   0 -10  -4   87.83    3.21
   0 -10  -4   86.97    3.17
   0 -10   4   82.78    3.28
   0 -10  -4   89.16    6.29
   0  10   4   81.81    6.24
   0 -10   4   85.78    3.23
   0  10  -4   85.03    6.39
   0  10   4   83.32    6.26
   0 -10  -5    1.00    0.53
   0  10  -5    1.51    0.92
   0 -10   5    1.89    0.64
   0  10   5    2.85    1.72
   0  10   5    1.62    1.32
   0 -10  -5    0.12    0.48
   0 -10  -5    1.10    0.55
   0  10  -5    1.23    0.97
   0 -10   5    0.98    0.68
   0 -10   5    0.47    0.51
   0 -10  -5    1.54    1.39
   0 -10  -6   45.59    2.28
   0 -10  -6   43.60    2.19
   0 -10   6   48.37    2.32
   0  10   6   45.82    4.67
   0 -10   6   43.44    2.36
   0  10   6   45.88    4.59
   0  10  -6   47.14    4.79
   0 -10  -6   46.62    2.23
   0  10  -6   45.97    4.58
   0 -10   6   46.59    2.42
   0 -10   7    0.64    0.53
   0 -10  -7    0.76    0.56
   0  10  -7    1.26    1.12
   0  10   7    1.17    1.25
   0 -10  -7    0.64    0.59
   0 -10   7    1.04    0.59
   0  10  -7   -0.32    0.99
   0 -10  -7    1.06    0.59
   0  10  -7    1.41    1.08
   0 -10   7    1.33    0.63
   0 -10   8   13.34    1.37
   0 -10  -8   14.95    1.25
   0 -10   8   13.93    1.36
   0 -10   8   12.88    1.22
   0  10  -8   14.22    2.61
   0 -10  -8   13.90    1.30
   0  10   8    9.44    1.99
   0 -10  -8   14.35    1.29
   0  10  -8   13.45    2.51
   0 -10  -9   46.19    2.31
   0 -10  -9   44.25    2.26
   0 -10   9   43.62    2.39
   0  10  -9   42.24    4.56
   0 -10   9   46.00    2.18
   0 -10   9   44.31    2.34
   0 -10  -9   44.03    2.09
   0  10  -9   43.10    4.52
   0  10   9   47.11    4.54
   0  10  -9   46.08    2.08
   0  10 -10   -0.02    0.42
   0  10 -10    0.13    0.92
   0 -10  10   -0.15    0.50
   0 -10  10    0.14    0.47
   0 -10  10    0.52    0.51
   0 -10 -10    0.13    0.45
   0  10 -10    0.44    1.07
   0 -10 -10    0.59    0.55
   0  10 -11   10.35    1.00
   0 -10  11   10.27    1.20
   0 -10 -11   10.53    1.14
   0  10 -11   10.15    2.11
   0  10 -11   10.37    2.45
   0 -10  11   10.02    1.12
   0 -10 -11   11.68    1.21
   0  10 -12  125.39    3.64
   0 -10 -12  121.27    3.57
   0 -10 -12  130.79    3.97
   0 -10  12  124.53    4.11
   0 -10  12  125.09    3.95
   0  10 -12  125.84    7.80
   0  10 -12  128.84    7.31
   0 -10 -12  126.95    3.86
   0 -10 -13   22.80    1.55
   0  10 -13   23.21    1.46
   0 -10 -13   24.13    1.63
   0 -10 -13   24.69    1.50
   0  10 -13   21.68    3.22
   0 -10  13   24.76    1.76
   0 -10  13   24.23    1.65
   0  10 -13   24.01    1.70
   0 -10 -14   28.53    1.74
   0 -10 -14   28.23    1.60
   0 -10 -14   28.59    1.70
   0  10 -14   30.93    3.81
   0  10 -14   30.23    1.63
   0 -10  14   29.35    1.86
   0 -10  14   27.62    1.69
   0  10 -14   30.42    1.86
   0  10 -15  120.67    3.74
   0 -10  15  119.06    3.51
   0 -10 -15  114.41    3.31
   0 -10 -15  118.36    3.46
   0  10 -15  121.41    3.40
   0 -10  15  122.06    3.81
   0 -10 -15  120.89    3.63
   0 -10 -16   90.94    2.99
   0 -10 -16   91.79    2.85
   0  10 -16   93.44    2.84
   0 -10  16   89.36    2.86
   0  10 -16   95.32    3.15
   0 -10  16   89.41    3.14
   0 -10 -16   87.20    2.75
   0 -10 -17   11.66    0.94
   0 -10  17   10.96    0.91
   0 -10 -17   10.83    0.90
   0  10 -17   10.74    0.89
   0 -10  17    9.69    1.00
   0  10 -17   10.53    1.01
   0 -10 -17   12.24    1.06
   0  10 -17    9.95    0.94
   0 -10 -18    4.02    0.56
   0  10 -18    3.06    0.59
   0 -10 -18    3.30    0.54
   0  10 -18    3.92    0.58
   0 -10  18    3.24    0.60
   0  10 -18    3.13    0.52
   0 -10 -18    3.39    0.56
   0 -10  18    3.46    0.53
   0  10 -19    4.58    0.59
   0  10 -19    4.87    0.56
   0  10 -19    4.61    0.55
   0 -10 -19    5.00    0.61
   0 -10  19    4.84    0.66
   0 -10 -19    5.36    0.57
   0  10 -20   20.61    0.99
   0 -10 -20   19.81    1.03
   0 -10 -20   21.28    0.97
   0  10 -20   20.05    1.07
   0 -10  20   20.67    1.15
   0 -10  21   71.06    1.98
   0  10 -21   68.26    1.66
   0  10 -21   69.22    1.80
   0 -10  22   31.79    1.08
   0 -11   0    1.47    0.66
   0  11   0   -1.58    1.18
   0 -11   0   -0.43    0.41
   0 -11   0    0.12    0.44
   0  11   0   -0.11    1.01
   0  11  -1  130.68    7.45
   0 -11   1  136.67    4.24
   0  11   1  141.93    7.55
   0 -11  -1  142.99    4.02
   0 -11   1  135.87    4.22
   0  11  -1  128.72    8.21
   0 -11   1  131.63    4.18
   0 -11  -1  131.93    4.12
   0 -11  -1  135.79    4.20
   0  11   1  124.08    8.05
   0  11  -2  370.83   13.17
   0 -11   2  377.13    7.82
   0  11   2  388.76   14.49
   0 -11   2  363.84    7.73
   0 -11  -2  375.80    7.45
   0  11  -2  374.06   14.32
   0 -11  -2  377.12    7.75
   0 -11   2  366.34    7.80
   0 -11   3   24.51    1.75
   0 -11  -3   24.18    1.67
   0  11  -3   20.52    3.04
   0 -11   3   24.66    1.76
   0  11  -3   22.42    3.48
   0 -11   3   23.52    1.73
   0  11   3   17.99    3.10
   0 -11  -3   22.21    1.59
   0 -11   4   69.41    2.98
   0 -11   4   70.60    2.92
   0  11  -4   70.02    5.91
   0  11  -4   70.78    5.59
   0 -11  -4   70.17    2.86
   0 -11  -4   73.48    2.87
   0  11   4   71.80    5.93
   0 -11   4   69.26    2.97
   0  11  -4   71.30    6.01
   0 -11  -4   68.89    2.61
   0 -11   5    7.22    1.08
   0  11  -5    6.51    2.09
   0  11  -5    5.63    1.79
   0 -11  -5    7.84    1.03
   0 -11  -5    6.40    0.87
   0  11  -5    6.44    1.92
   0 -11   5    5.76    0.92
   0 -11  -5    5.42    0.81
   0 -11   5    6.67    0.98
   0  11   5    7.29    1.91
   0 -11  -6   71.21    2.74
   0 -11   6   72.39    3.04
   0  11  -6   77.51    5.96
   0 -11   6   73.82    2.91
   0 -11  -6   75.20    2.95
   0 -11  -6   73.46    2.84
   0 -11   6   73.82    3.04
   0  11  -6   72.89    5.90
   0  11  -7  180.25    9.18
   0  11  -7  176.42    9.26
   0 -11   7  180.46    5.02
   0 -11  -7  179.16    4.68
   0 -11   7  185.54    4.81
   0 -11   7  183.40    5.03
   0 -11  -7  179.76    4.81
   0 -11  -7  181.94    4.65
   0  11   7  200.35    9.18
   0 -11   8   39.13    2.02
   0 -11  -8   37.79    2.06
   0 -11  -8   34.89    1.91
   0 -11   8   34.65    2.04
   0  11  -8   35.24    4.04
   0 -11   8   33.40    2.03
   0 -11  -8   35.21    1.86
   0  11  -8   35.59    4.08
   0 -11  -9   46.36    2.23
   0 -11  -9   49.18    2.32
   0 -11   9   47.61    2.40
   0  11  -9   51.44    4.83
   0 -11  -9   44.41    2.02
   0 -11   9   49.59    2.20
   0  11  -9   42.48    4.37
   0 -11   9   47.62    2.36
   0 -11  10   17.86    1.43
   0 -11 -10   19.38    1.43
   0  11 -10   19.94    3.04
   0 -11  10   16.70    1.26
   0  11 -10   17.55    2.98
   0 -11  10   17.62    1.44
   0 -11 -10   17.61    1.38
   0  11 -11  101.58    6.41
   0 -11  11   99.13    3.38
   0  11 -11   96.66    6.55
   0 -11  11  105.04    3.57
   0 -11 -11  103.82    3.35
   0 -11 -11  102.75    3.34
   0 -11  12   80.08    3.02
   0 -11  12   80.92    2.93
   0  11 -12   81.64    2.58
   0  11 -12   82.26    5.95
   0  11 -12   79.88    2.97
   0 -11 -12   82.13    2.91
   0 -11 -12   83.39    2.91
   0 -11  13    7.33    0.91
   0 -11 -13    5.89    0.80
   0  11 -13    6.93    0.75
   0 -11 -13    6.03    0.83
   0 -11  13    7.34    0.92
   0  11 -13    7.18    0.91
   0  11 -13    7.01    1.87
   0  11 -14   28.88    1.38
   0 -11 -14   25.93    1.48
   0 -11 -14   24.73    1.51
   0  11 -14   29.26    1.66
   0 -11  14   27.85    1.65
   0 -11  14   25.74    1.50
   0  11 -15    9.35    0.78
   0 -11  15    8.43    0.82
   0 -11 -15    9.32    0.90
   0 -11  15    8.55    0.92
   0  11 -15    8.98    0.94
   0 -11 -15   11.09    0.97
   0  11 -16    0.22    0.27
   0  11 -16    0.03    0.35
   0 -11 -16    0.00    0.38
   0 -11  16    0.30    0.35
   0 -11 -16    0.26    0.37
   0  11 -16   -0.04    0.34
   0 -11  16    0.03    0.31
   0 -11 -17   32.55    1.46
   0  11 -17   30.41    1.37
   0  11 -17   32.72    1.51
   0  11 -17   30.90    1.21
   0 -11  17   32.72    1.53
   0 -11  17   30.66    1.27
   0  11 -18   34.45    1.30
   0 -11  18   36.56    1.50
   0  11 -18   36.15    1.45
   0 -11 -18   37.63    1.46
   0 -11  19    5.61    0.55
   0  11 -19    4.96    0.50
   0 -11  20    0.11    0.21
   0 -12   0  627.28   10.89
   0  12   0  609.42   18.24
   0 -12   1    0.12    0.39
   0 -12   1    0.94    0.66
   0  12   1    1.10    1.21
   0 -12  -1    1.16    0.60
   0  12  -1    1.58    0.98
   0  12  -2    0.62    0.97
   0 -12  -2    0.41    0.55
   0  12   2    0.17    1.28
   0 -12   2    0.23    0.42
   0  12  -2    0.57    1.08
   0 -12   2    1.22    0.68
   0 -12   3   70.24    2.78
   0  12  -3   68.73    5.73
   0  12   3   76.24    5.88
   0 -12  -3   74.63    2.73
   0  12  -3   69.64    5.33
   0 -12   3   72.08    2.87
   0 -12  -3   72.34    2.82
   0  12  -4   85.00    5.92
   0 -12  -4   82.20    3.02
   0 -12   4   87.62    3.14
   0 -12   4   86.08    3.10
   0  12   4   82.23    6.01
   0  12  -4   75.66    5.99
   0 -12  -4   85.82    2.99
   0  12   5    2.45    1.56
   0 -12   5    1.27    0.53
   0 -12  -5    2.40    0.61
   0 -12  -5    2.03    0.52
   0  12  -5    0.90    1.15
   0 -12  -5    1.75    0.58
   0  12  -5    2.60    1.07
   0 -12   5    1.67    0.59
   0 -12   5    1.53    0.58
   0 -12   6    6.32    0.87
   0 -12  -6    6.43    0.80
   0 -12   6    7.08    0.93
   0 -12  -6    7.00    0.90
   0  12  -6    7.72    2.00
   0 -12  -6    6.52    0.87
   0  12  -6    5.02    1.59
   0 -12   6    6.58    0.92
   0 -12   7   17.00    1.39
   0 -12  -7   16.23    1.30
   0 -12  -7   16.42    1.22
   0  12  -7   12.92    2.34
   0 -12  -7   17.24    1.24
   0 -12   7   16.46    1.35
   0 -12   7   17.34    1.32
   0  12  -7   16.63    2.64
   0 -12  -8    5.52    0.80
   0  12  -8    6.09    1.65
   0 -12  -8    5.91    0.74
   0 -12   8    5.98    0.86
   0 -12  -8    4.99    0.73
   0 -12   8    5.19    0.82
   0 -12   8    4.40    0.68
   0  12  -8    5.98    1.68
   0 -12  -9    1.51    0.42
   0 -12   9    1.41    0.56
   0 -12  -9    1.77    0.53
   0 -12   9    1.85    0.53
   0 -12   9    1.17    0.53
   0 -12  -9    2.69    0.57
   0 -12  10    2.59    0.51
   0 -12  10    2.68    0.62
   0 -12 -10    2.30    0.58
   0  12 -10    3.80    1.27
   0  12 -10    2.69    0.59
   0 -12 -10    4.26    0.74
   0 -12  10    2.50    0.61
   0 -12 -11    3.71    0.67
   0 -12 -11    3.68    0.62
   0 -12  11    3.79    0.67
   0  12 -11    3.49    0.66
   0 -12  11    4.01    0.66
   0 -12 -12  138.15    3.50
   0  12 -12  138.02    3.63
   0 -12  12  131.08    3.57
   0 -12 -12  137.68    3.51
   0 -12  12  133.46    3.52
   0 -12  13    6.78    0.77
   0 -12 -13    7.05    0.75
   0 -12 -13    7.73    0.79
   0  12 -13    6.30    0.74
   0 -12  13    6.42    0.72
   0 -12  14   25.22    1.34
   0 -12 -14   26.60    1.33
   0  12 -14   25.86    1.34
   0  12 -15   -0.02    0.28
   0 -12 -15    0.25    0.31
   0 -12  15    0.42    0.31
   0  12 -15   -0.11    0.32
   0  12 -16    0.54    0.29
   0 -12 -16   -0.83    0.32
   0  12 -16   -0.23    0.26
   0 -12  16    0.79    0.32
   0 -12  17    3.97    0.44
   0  12 -17    4.27    0.46
   0 -13   0    0.43    0.44
   0 -13  -1   50.25    2.17
   0 -13   1   50.36    2.20
   0 -13   2   46.88    2.11
   0 -13  -2   44.39    2.03
   0 -13  -3    9.04    0.97
   0 -13   3    7.99    0.89
   0 -13   4    6.58    0.82
   0 -13   4    6.70    0.79
   0 -13  -4    6.22    0.76
   0 -13   5    0.60    0.39
   0 -13  -5    0.64    0.48
   0 -13   5    1.52    0.53
   0 -13  -6    9.35    0.89
   0 -13   6    9.18    0.88
   0 -13   6    9.39    0.88
   0 -13   7    0.84    0.46
   0 -13  -7    0.25    0.34
   0 -13  -7    0.23    0.36
   0 -13   7   -0.27    0.37
   0 -13  -8   30.77    1.35
   0 -13  -8   31.22    1.36
   0  13  -8   30.33    1.52
   0 -13   8   34.15    1.50
   0 -13   8   32.67    1.56
   0 -13  -9    4.18    0.55
   0 -13   9    5.16    0.58
   0  13  -9    4.63    0.63
   0 -13   9    4.48    0.62
   0 -13 -10  131.07    3.03
   0 -13  10  136.16    3.27
   0 -13  10  140.81    2.91
   0  13 -10  140.76    3.35
   0  13 -11    8.27    0.74
   0 -13  11    6.48    0.66
   0 -13 -11    6.69    0.65
   0  13 -12    2.49    0.47
   0 -13  12    2.87    0.45
   0  13 -12    2.26    0.45
   0  13 -13    6.07    0.58
   0  13 -13    5.08    0.57
   0 -13  13    5.67    0.54
   0 -13  14    6.84    0.51
   0  13 -14    5.93    0.53
   0  13 -14    7.03    0.55
   0 -14   0  121.86    3.09
   0 -14   1    1.36    0.44
   0 -14  -1    0.32    0.37
   0  14  -2  207.48    3.87
   0 -14   2  222.31    4.44
   0 -14  -2  216.87    4.35
   0 -14  -3   76.11    2.26
   0 -14   3   80.89    2.37
   0  14  -3   74.00    2.02
   0 -14   4    1.41    0.44
   0 -14  -4    0.83    0.37
   0  14  -4    1.47    0.35
   0 -14  -5   14.12    0.88
   0 -14   5   15.41    0.94
   0  14  -5   14.79    0.86
   0  14  -6    8.85    0.67
   0 -14  -6    8.88    0.65
   0 -14   6    8.48    0.69
   0  14  -7   53.34    1.62
   0 -14   7   54.17    1.61
   0 -14   8   14.63    0.73
   0  14  -8   15.24    0.81
   0  14  -8   15.63    0.88
   0  14  -9    5.41    0.53
   0  14  -9    5.46    0.48
   0  14 -10    9.82    0.63
  -1   0  29   -0.06    0.22
   1   0 -29    0.54    0.24
  -1   0  29   -0.05    0.24
  -1   0  28    6.97    0.71
  -1   0  28    7.91    0.74
  -1   0  28    7.22    0.65
   1   0 -28    7.53    0.68
   1   0 -27    0.76    0.38
  -1   0  27   -0.35    0.32
  -1   0  27   -0.04    0.38
   1   0 -27    0.18    0.35
  -1   0  26   10.81    0.97
   1   0 -26   10.17    0.97
   1   0 -26   10.08    0.87
  -1   0  26   11.45    1.05
  -1   0  25   -0.27    0.43
  -1   0  25   -0.21    0.40
   1   0 -25    0.05    0.44
   1   0 -25   -0.01    0.35
  -1   0  25    0.28    0.33
   1   0 -24  193.64    4.70
  -1   0  24  198.99    4.97
   1   0 -24  195.95    5.03
  -1   0  24  190.26    4.51
  -1   0  24  195.92    9.35
  -1   0  23    0.16    1.06
  -1   0  23    0.83    0.61
  -1   0  23    0.24    0.90
   1   0 -23    0.35    0.45
  -1   0  23   -0.14    0.39
   1   0 -23    0.04    0.48
  -1   0  22   19.28    1.52
  -1   0  22   16.70    2.88
  -1   0  22   17.38    1.32
   1   0 -22   19.32    1.57
   1   0 -22   19.66    1.46
  -1   0  21    1.56    1.36
   1   0 -21   -0.58    0.55
  -1   0  21    0.53    0.40
   1   0 -21   -0.26    0.54
  -1   0  21   -0.95    0.94
  -1   0  20   80.72    6.09
   1   0 -20   85.56    6.32
   1   0 -20   81.86    3.19
  -1   0  20   79.72    2.91
  -1   0  20   81.55    5.81
   1   0 -20   82.18    3.04
  -1   0  20   87.33    6.25
   1   0 -20   78.23    3.10
  -1   0  19   -0.49    0.85
  -1   0  19   -0.60    1.12
  -1   0  19    0.59    0.54
   1   0 -19   -0.68    0.83
   1   0 -19    0.16    0.54
   1   0 -19    0.43    0.51
  -1   0  19    1.10    1.43
   1   0 -19   -0.51    0.47
   1   0 -18   72.64    2.74
  -1   0  18   68.45    5.11
  -1   0  18   76.41    5.51
   1   0 -18   72.69    2.89
   1   0 -18   74.65    5.64
   1   0 -18   73.93    2.93
  -1   0  18   70.22    5.48
   1   0 -17    0.04    0.44
  -1   0  17   -0.12    0.75
   1   0 -17    0.07    0.43
   1   0 -17    0.35    0.72
  -1   0  17   -0.54    0.86
  -1   0  17    0.74    1.05
  -1   0  16  156.68    7.05
  -1   0  16  161.83    7.82
  -1   0  16  162.38    7.56
  -1   0  16  163.72    7.38
   1   0 -16  166.73    7.80
  -1   0  15    0.84    0.94
  -1   0  15    0.57    0.63
  -1   0  15   -0.75    1.01
  -1   0  15    1.41    0.90
   1   0 -15   -0.38    0.94
  -1   0  15    1.03    0.92
   1   0 -14 1116.31   21.73
  -1   0  14 1064.23   21.56
  -1   0  14 1086.81   20.98
  -1   0  14 1078.65   21.80
  -1   0  14 1062.90   20.42
  -1   0  14 1105.38   21.37
  -1   0  13   -0.26    0.69
  -1   0  13    0.53    0.54
  -1   0  13   -0.24    0.81
  -1   0  13    0.35    0.64
   1   0 -13   -0.32    0.68
   1   0 -12  475.21   11.73
   1   0 -12  457.34   11.54
  -1   0  12  457.17   11.67
  -1   0  12  461.25   11.38
  -1   0  12  457.61   10.99
   1   0 -11    0.00    0.61
  -1   0  11    0.88    0.83
  -1   0  11    0.00    0.64
  -1   0  11   -0.12    0.57
   1   0 -11    0.07    0.64
  -1   0  10 1044.42   17.99
  -1   0  10 1017.47   17.54
  -1   0  10 1037.29   18.32
   1   0 -10 1052.82   18.27
   1   0 -10 1005.59   18.16
  -1   0   9    0.15    0.57
   1   0  -9    0.54    0.63
   1   0  -9    0.56    0.60
  -1   0   9    0.56    0.68
  -1   0   9    0.89    0.74
  -1   0   8   50.47    2.62
   1   0  -8   47.68    2.70
  -1   0   8   49.05    2.60
  -1   0   8   48.52    2.66
   1   0  -8   45.05    2.63
  -1   0   8   43.71    2.60
  -1   0   7    0.94    0.63
   1   0  -7    0.03    0.33
   1   0  -7    1.85    0.73
  -1   0   7    0.13    0.54
  -1   0   6  740.69   10.74
   1   0  -6  714.66   12.04
   1   0  -6  706.35   10.79
  -1   0   6  713.83   11.77
   1   0  -5    0.92    0.62
  -1   0   5    0.01    0.34
  -1   0   5    1.43    0.77
   1   0  -5    0.22    0.37
   1   0  -4  204.69    3.44
   1   0  -4  191.17    3.63
  -1   0   4  204.16    3.97
   1   0  -4  203.68    4.53
  -1   0   4  204.56    4.42
   1   0  -3   -0.02    0.30
  -1   0   3    0.50    0.35
   1   0  -3    0.40    0.23
   1   0  -2  101.26    1.81
   1   0  -2   99.39    1.76
  -1   0   2  100.59    2.34
  -1   0   1   -0.10    0.20
   1   0  -1   -0.03    0.19
   1   0   0   86.42    1.56
   1   0   0   84.69    1.92
   1   0   0   84.78    1.89
  -1   0   0   86.30    1.95
  -1   0  -1    0.09    0.18
   1   0   1    0.15    0.25
  -1   0  -2   81.70    2.20
   1   0   2   86.95    2.20
  -1   0  -2   87.21    1.87
  -1   0  -3    0.01    0.19
  -1   0  -3    0.32    0.33
   1   0   3    0.60    0.41
  -1   0  -3   -0.05    0.19
  -1   0  -4  202.15    4.50
  -1   0  -4  203.63    3.50
  -1   0  -4  203.06    3.39
   1   0   4  209.25    4.51
   1   0   5    0.24    0.53
  -1   0  -5    0.04    0.25
  -1   0  -5    0.05    0.22
  -1   0  -5    0.14    0.45
   1   0   5   -0.62    0.56
  -1   0  -6  750.03   12.40
   1   0   6  758.45   12.41
   1   0   6  763.74   12.42
  -1   0  -6  758.63   10.61
  -1   0  -6  734.42    9.94
   1   0   7    0.12    0.49
  -1   0  -7    0.03    0.18
   1   0   7    0.22    0.54
  -1   0  -7   -0.27    0.55
   1   0   7    0.61    0.64
   1   0   8   40.14    2.54
  -1   0  -8   36.40    1.18
  -1   0  -8   43.48    2.56
  -1   0  -8   41.32    2.53
   1   0   8   40.86    2.51
   1   0   8   40.83    2.53
   1   0   9   -0.44    0.54
  -1   0  -9    0.01    0.13
   1   0   9    0.21    0.61
   1   0   9    0.03    0.68
  -1   0  -9    0.98    0.81
  -1   0  -9    1.19    0.69
   1   0   9    0.69    0.84
   1   0   9   -0.18    0.56
  -1   0 -10 1047.63   18.27
   1   0  10 1041.20   18.13
  -1   0 -10 1017.29   18.26
   1   0  10 1030.39   18.15
   1   0  10 1026.90   18.36
   1   0  10 1015.29   18.29
   1   0  10 1055.19   18.36
   1   0  11    0.01    0.61
   1   0  11    1.10    1.16
   1   0  11   -0.28    0.55
   1   0  11    0.14    0.71
  -1   0 -11    1.51    0.95
   1   0  11    0.43    0.88
  -1   0 -11   -0.06    0.60
   1   0  12  509.32   12.09
   1   0  12  482.64   11.85
  -1   0 -12  498.24   12.17
   1   0  12  501.18   12.35
   1   0  12  487.70   12.24
  -1   0 -12  503.71   12.23
  -1   0 -13    0.58    0.92
   1   0  13   -0.48    0.69
   1   0  13   -0.16    0.69
  -1   0 -13    0.60    0.85
   1   0  13   -0.29    0.62
   1   0  13    0.16    0.89
   1   0  14 1041.74   20.71
   1   0  14 1022.70   20.98
  -1   0 -14 1039.05   20.89
   1   0  14 1009.50   19.17
  -1   0 -14 1052.32   21.00
   1   0  14 1032.60   20.90
   1   0  15    0.46    0.53
   1   0  15   -0.41    0.82
   1   0  15   -0.22    0.98
  -1   0 -15   -0.90    0.76
  -1   0 -15   -0.01    0.71
   1   0  16  153.63    6.61
  -1   0 -16  155.95    7.56
   1   0  16  155.51    7.56
   1   0  16  166.60    7.66
  -1   0 -16  158.81    7.51
  -1   0 -17    0.31    0.45
   1   0  17   -0.09    0.77
  -1   0 -17   -0.21    0.78
   1   0  17    0.50    1.03
  -1   0 -17   -0.05    0.72
   1   0  18   66.28    5.31
  -1   0 -18   66.62    2.69
  -1   0 -18   63.12    5.19
   1   0  18   70.61    5.38
   1   0  18   61.81    2.51
  -1   0 -18   66.83    5.20
  -1   0 -18   65.53    2.63
  -1   0 -18   64.83    2.59
  -1   0 -18   67.52    2.67
   1   0  19    0.26    0.90
  -1   0 -19    0.19    0.44
   1   0  19    0.83    0.96
  -1   0 -19   -0.41    0.46
   1   0  19    1.00    0.50
   1   0  19    0.75    0.90
  -1   0 -19   -0.39    0.48
  -1   0 -19   -0.86    1.07
  -1   0 -19    0.13    0.45
  -1   0 -20   81.00    3.09
   1   0  20   92.75    6.34
   1   0  20   81.12    6.09
  -1   0 -20   84.25    3.13
  -1   0 -20   81.49    3.04
   1   0  20   83.16    2.96
  -1   0 -20   87.31    3.20
  -1   0 -20   88.29    6.48
   1   0  21   -0.56    1.21
  -1   0 -21   -0.14    0.50
   1   0  21    0.10    0.38
  -1   0 -21   -0.10    0.53
  -1   0 -21    0.45    0.48
   1   0  22   18.94    1.37
   1   0  22   19.41    1.52
  -1   0 -22   18.02    1.45
   1   0  22   20.94    3.08
  -1   0 -22   17.76    1.41
  -1   0 -22   20.06    1.53
  -1   0 -23    0.09    0.49
   1   0  23    0.02    0.35
   1   0  23    1.29    1.18
   1   0  23   -0.16    0.46
  -1   0 -23    0.70    0.50
   1   0  24  199.49    4.55
   1   0  24  196.17    8.99
  -1   0 -24  200.21    4.94
   1   0  24  198.40    4.89
  -1   0 -24  204.77    5.03
   1   0  25   -0.02    0.48
  -1   0 -25    0.91    0.48
   1   0  25   -0.04    0.38
  -1   0 -25    0.07    0.39
   1   0  26    8.87    0.88
  -1   0 -26   11.18    0.99
  -1   0 -26    8.43    0.84
   1   0  26    9.16    0.95
  -1   0 -27    0.40    0.29
   1   0  27   -0.10    0.35
  -1   0 -27    0.06    0.32
   1   0  27   -0.38    0.44
   1   0  27    0.23    0.30
   1   0  28    6.69    0.66
  -1   0 -28    6.29    0.57
   1   0  28    7.27    0.70
  -1   0 -28    8.31    0.67
   1   0  29    0.27    0.25
   1   0  29    0.27    0.23
   1   0  29    0.11    0.25
   1   1 -29    5.43    0.51
  -1   1  29    6.35    0.56
  -1  -1  29    6.10    0.53
  -1  -1  29    5.76    0.53
  -1   1  29    6.34    0.56
  -1  -1  28   12.02    0.87
   1  -1 -28   12.02    0.73
  -1   1  28   13.35    0.90
   1   1 -28   11.76    0.84
   1  -1 -28   11.60    0.80
  -1   1  28   11.41    0.76
  -1  -1  28   11.60    0.87
   1  -1 -27    6.07    0.65
  -1  -1  27    4.05    0.61
  -1   1  27    4.55    0.69
  -1   1  27    4.92    0.63
   1   1 -27    4.12    0.62
  -1  -1  27    4.76    0.65
   1  -1 -27    4.68    0.63
   1  -1 -26    2.89    0.57
  -1  -1  26    2.20    0.54
   1   1 -26    3.59    0.67
  -1   1  26    3.74    0.66
  -1   1  26    3.83    0.65
  -1  -1  26    3.85    0.66
   1  -1 -26    3.00    0.59
   1  -1 -25   49.54    2.10
  -1   1  25   44.83    4.26
  -1  -1  25   47.76    2.23
  -1  -1  25   44.19    2.10
   1   1 -25   44.34    1.87
   1   1 -25   46.14    2.19
  -1   1  25   45.69    2.05
   1  -1 -25   43.85    2.10
  -1   1  24    1.40    1.32
  -1  -1  24    2.84    0.75
  -1   1  24    1.71    0.54
   1  -1 -24    1.80    0.56
   1  -1 -24    1.70    0.58
  -1  -1  24    2.29    0.64
  -1   1  24    3.82    1.64
   1   1 -24    2.12    0.53
   1   1 -24    1.98    0.58
  -1  -1  24    1.61    0.61
  -1  -1  23   63.00    2.73
  -1   1  23   63.28    2.63
   1  -1 -23   59.85    2.57
  -1  -1  23   57.64    2.41
  -1   1  23   59.85    2.35
  -1   1  23   65.10    5.53
   1   1 -23   63.37    2.74
   1   1 -23   62.56    2.47
  -1  -1  23   55.30    4.96
   1  -1 -23   62.26    2.69
  -1  -1  22    4.59    0.82
  -1   1  22    1.93    1.56
   1  -1 -22    3.99    0.77
   1  -1 -22    3.19    0.70
   1   1 -22    4.72    0.79
   1   1 -22    4.49    0.82
  -1  -1  22    3.54    1.49
  -1   1  22    3.22    1.69
  -1  -1  22    3.10    0.60
  -1   1  22    4.19    0.69
   1   1 -21    4.75    0.88
  -1   1  21    4.58    0.72
  -1  -1  21    3.38    1.55
   1  -1 -21    5.51    0.93
  -1  -1  21    5.21    0.83
   1  -1 -21    4.13    0.82
  -1   1  21    4.90    1.67
  -1  -1  21    4.82    1.59
   1   1 -21    3.76    0.76
  -1   1  21    3.32    1.43
  -1  -1  21    4.66    0.86
   1   1 -21    4.74    0.76
  -1  -1  20   19.53    2.99
   1  -1 -20   19.20    3.15
   1   1 -20   21.54    1.52
  -1  -1  20   19.57    1.52
   1  -1 -20   19.52    1.49
   1  -1 -20   19.54    1.55
  -1   1  20   20.30    1.44
   1   1 -20   20.54    1.57
  -1   1  20   22.28    3.26
  -1  -1  20   29.64    4.59
   1   1 -20   22.51    3.24
  -1   1  20   21.26    3.17
   1   1 -20   19.82    1.58
  -1   1  20   22.53    3.14
  -1  -1  20   18.52    1.41
   1   1 -19    2.17    0.67
  -1  -1  19    2.81    1.52
  -1  -1  19    2.09    1.29
  -1   1  19    3.59    1.49
   1  -1 -19    1.02    1.08
  -1  -1  19   -0.10    0.81
  -1  -1  19    3.67    0.74
  -1   1  19    3.44    1.51
   1  -1 -19    3.55    0.75
   1   1 -19    2.91    0.77
   1  -1 -19    3.56    0.83
   1   1 -19    3.43    0.61
   1   1 -19    3.79    1.03
  -1   1  19    2.93    1.31
  -1  -1  18    4.67    1.38
  -1  -1  18    6.46    0.86
   1   1 -18    6.44    0.86
   1  -1 -18    6.52    0.90
   1   1 -18    5.60    1.55
   1   1 -18    6.86    0.93
   1  -1 -18    6.53    0.93
  -1  -1  18    3.43    1.32
   1  -1 -18    6.04    0.89
  -1   1  18    7.51    1.74
  -1  -1  18    5.63    1.60
   1  -1 -18    6.97    1.92
   1   1 -18    6.62    0.90
   1  -1 -18    6.08    0.88
  -1   1  18    5.60    1.56
  -1   1  18    9.16    2.13
  -1   1  18    6.74    1.57
   1   1 -17  141.23    7.38
  -1   1  17  140.49    7.52
  -1   1  17  131.23    7.02
  -1   1  17  145.11    7.45
  -1   1  17  138.52    7.32
   1  -1 -17  141.63    7.57
  -1   1  17  139.99    7.15
   1  -1 -17  144.99    4.09
   1  -1 -17  138.58    4.05
  -1  -1  17  139.75    7.21
  -1  -1  17  141.06    6.89
  -1  -1  17  142.26    7.57
   1   1 -17  140.74    4.08
   1   1 -17  140.79    4.07
   1   1 -16  132.37    6.85
  -1  -1  16  135.22    6.80
  -1   1  16  125.65    6.63
  -1   1  16  130.22    6.65
  -1  -1  16  131.69    7.05
  -1   1  16  132.16    6.92
   1  -1 -16  133.04    7.04
  -1  -1  16  132.96    6.44
  -1   1  16  137.72    6.95
  -1   1  15  160.15    7.35
  -1  -1  15  160.92    6.85
  -1   1  15  161.35    7.26
  -1   1  15  152.50    7.02
   1  -1 -15  170.08    7.62
   1   1 -15  160.52    7.25
  -1  -1  15  167.94    7.63
  -1   1  15  160.77    7.25
  -1  -1  15  170.12    7.35
  -1  -1  14    5.91    1.34
  -1   1  14    6.91    1.56
   1   1 -14    6.59    1.44
  -1  -1  14    6.18    1.52
  -1   1  14    5.71    1.34
   1   1 -14    6.35    1.33
  -1   1  14    5.90    1.39
  -1  -1  14    5.23    1.25
   1  -1 -14    5.24    1.35
  -1  -1  13   79.52    4.13
  -1   1  13   80.87    4.64
  -1  -1  13   84.59    4.67
   1   1 -13   76.70    4.52
  -1   1  13   76.23    4.57
  -1   1  13   81.39    4.63
  -1  -1  13   82.41    4.39
  -1  -1  13   84.99    4.92
   1   1 -13   80.04    4.59
   1  -1 -13   82.76    4.78
  -1   1  13   81.85    4.50
  -1  -1  12  659.60   14.01
  -1   1  12  638.52   13.99
   1  -1 -12  642.60   14.35
  -1  -1  12  616.61   13.39
   1   1 -12  643.76   14.08
  -1   1  12  612.61   14.03
   1   1 -12  625.79   13.88
  -1  -1  12  621.52   12.84
  -1   1  12  652.75   14.12
  -1   1  12  623.96   13.62
  -1  -1  12  638.81   14.43
   1  -1 -11  241.94    7.69
  -1   1  11  238.88    7.50
   1   1 -11  238.97    7.44
  -1   1  11  240.77    7.47
  -1   1  11  233.33    7.53
  -1  -1  11  246.06    7.24
  -1  -1  11  237.02    7.32
  -1  -1  11  233.42    7.67
  -1   1  11  237.95    7.57
   1   1 -11  243.23    7.52
  -1  -1  11  240.54    6.82
  -1   1  11  233.62    7.15
   1   1 -11  245.27    6.87
  -1   1  10  399.36    9.84
  -1   1  10  403.46    9.77
  -1  -1  10  406.53    8.98
  -1  -1  10  395.71   10.02
  -1   1  10  403.13    9.81
   1   1 -10  413.33    9.84
  -1   1  10  405.32    9.46
   1   1 -10  409.38    9.03
   1   1 -10  421.91    9.88
   1  -1 -10  416.80   10.10
  -1  -1  10  418.82    9.73
  -1  -1  10  407.11    9.41
  -1   1  10  409.95    9.91
   1   1  -9  146.70    4.69
  -1  -1   9  148.67    5.41
  -1  -1   9  151.52    4.98
  -1   1   9  152.34    5.27
  -1   1   9  150.53    5.20
  -1   1   9  148.59    5.25
  -1   1   9  148.12    4.98
  -1  -1   9  146.47    4.69
   1   1  -9  151.07    5.21
  -1   1   9  143.38    5.18
  -1  -1   9  147.07    5.03
   1   1  -9  148.36    5.15
   1  -1  -9  149.50    5.35
  -1  -1   9  151.49    5.44
   1  -1  -8  493.38   10.35
  -1   1   8  495.26   10.24
  -1   1   8  507.84    9.87
  -1  -1   8  488.50    9.70
  -1  -1   8  494.32    9.39
   1   1  -8  485.49   10.04
  -1   1   8  494.30   10.23
  -1  -1   8  484.64   10.42
  -1  -1   8  495.98    9.94
  -1  -1   8  493.63   10.43
   1   1  -8  499.60    9.50
  -1   1   8  516.72    7.86
   1   1  -8  493.54   10.03
  -1   1   8  500.62   10.24
   1  -1  -7   22.31    1.48
  -1  -1   7   21.81    1.63
   1   1  -7   21.93    1.56
   1   1  -7   24.41    1.78
  -1  -1   7   23.56    1.72
  -1   1   7   24.17    1.82
   1  -1  -7   22.51    1.81
  -1  -1   7   22.84    1.57
  -1   1   7   24.45    1.21
  -1   1   7   21.60    1.77
   1   1  -6   48.20    2.33
  -1   1   6   49.97    2.39
   1  -1  -6   51.37    2.50
  -1   1   6   51.30    1.75
  -1  -1   6   50.33    2.16
  -1  -1   6   52.38    2.30
   1  -1  -6   50.51    2.12
  -1   1   6   48.41    2.43
  -1  -1   6   48.07    2.25
   1  -1  -5  117.36    3.14
  -1   1   5  117.02    3.47
  -1   1   5  116.37    2.93
   1   1  -5  117.91    3.45
  -1  -1   5  118.76    3.41
   1  -1  -5  117.72    3.60
  -1   1   5  121.28    2.82
  -1   1   4   80.98    2.53
  -1   1   4   78.48    2.14
   1  -1  -4   76.94    2.60
   1  -1  -4   80.59    2.34
  -1   1   4   77.36    2.07
  -1  -1   4   80.76    2.48
   1   1  -3   18.58    1.04
   1  -1  -3   20.05    1.06
  -1   1   3   17.98    0.97
   1   1  -3   19.27    1.12
  -1   1   3   21.12    1.10
  -1  -1   3   20.35    1.19
   1  -1  -3   18.24    1.14
   1  -1  -2   34.86    1.34
   1   1  -2   33.62    1.37
   1   1  -2   36.15    1.45
   1  -1  -2   36.13    1.36
  -1  -1   2   37.88    1.54
  -1   1   2   35.65    1.37
   1   1  -1   11.71    0.80
   1  -1  -1   10.56    0.63
  -1   1   1   10.57    0.74
  -1  -1   1   11.26    0.81
   1  -1  -1   11.81    0.47
  -1   1   1   10.90    0.67
  -1   1   1   10.32    0.71
   1   1   0   32.06    1.28
  -1   1   0   33.37    1.03
   1   1   0   30.23    0.92
  -1  -1   0   34.81    1.31
   1  -1   0   34.33    0.85
  -1   1  -1   11.30    0.72
   1   1   1   10.09    0.59
   1  -1   1   11.19    0.78
  -1  -1  -1   11.40    0.69
   1   1   1   11.25    0.79
   1   1   1   11.65    0.72
  -1  -1  -2   37.67    1.45
  -1  -1  -2   38.08    1.54
  -1  -1  -2   38.35    1.19
  -1   1  -2   37.38    1.51
   1  -1   2   35.63    1.48
   1   1   2   37.80    1.18
   1   1   2   38.58    1.31
  -1   1  -2   36.87    1.24
  -1  -1  -3   20.37    0.76
  -1   1  -3   18.73    1.01
  -1   1  -3   20.58    1.25
  -1  -1  -3   18.16    1.18
  -1  -1  -3   19.02    1.06
   1  -1   3   17.57    1.11
   1   1   3   20.00    0.77
   1   1   3   19.00    1.07
   1  -1   4   90.48    2.80
  -1   1  -4   85.27    2.85
  -1  -1  -4   88.18    2.89
   1   1   4   86.96    2.74
   1   1   4   81.18    2.64
  -1   1  -4   87.67    2.56
   1   1   4   90.63    1.73
  -1  -1  -4   87.12    2.53
   1  -1   5  109.16    3.38
   1   1   5  100.00    1.81
   1   1   5  113.11    3.38
  -1   1  -5  112.71    2.47
   1   1   5  112.79    3.34
  -1  -1  -5  110.80    3.01
  -1  -1  -5  103.49    3.42
  -1   1  -5  106.65    3.40
  -1   1  -5  109.98    3.22
  -1   1  -6   50.29    2.43
   1   1   6   53.20    2.52
  -1   1  -6   57.12    2.45
  -1  -1  -6   52.72    2.11
   1   1   6   55.33    2.53
   1   1   6   52.69    2.40
  -1  -1  -6   53.24    2.60
   1  -1   6   59.58    2.64
  -1  -1  -7   26.45    1.98
   1   1   7   25.96    1.84
  -1  -1  -7   26.49    1.58
   1  -1   7   26.49    1.94
   1   1   7   26.27    1.91
  -1   1  -7   25.09    1.82
   1  -1   7   25.11    1.88
   1  -1   7   25.69    1.91
  -1   1  -7   26.32    1.81
  -1   1  -8  477.36    9.75
   1  -1   8  496.90   10.40
   1   1   8  492.58   10.25
   1   1   8  479.04    9.99
  -1  -1  -8  484.77   10.21
  -1   1  -8  490.05   10.16
   1  -1   8  483.99    9.98
  -1  -1  -8  482.31   10.26
  -1  -1  -8  485.95    8.85
   1  -1   8  483.90   10.23
   1   1   8  487.20    9.21
  -1  -1  -9  136.57    5.14
   1   1   9  144.01    5.24
   1   1   9  141.57    5.05
   1  -1   9  140.77    5.03
  -1  -1  -9  140.50    5.19
  -1   1  -9  141.04    4.94
  -1   1  -9  143.00    5.15
   1  -1   9  144.33    5.24
   1   1   9  140.92    4.45
   1  -1   9  144.97    5.26
   1  -1   9  137.02    5.15
  -1  -1  -9  143.39    4.25
   1   1   9  138.79    4.98
   1   1   9  143.32    5.22
  -1  -1 -10  438.84   10.52
  -1   1 -10  434.59    9.96
   1   1  10  443.83   10.22
   1   1  10  435.26   10.45
   1   1  10  435.23   10.40
  -1   1 -10  438.49   10.12
  -1  -1 -10  438.70   10.49
   1  -1  10  437.87   10.53
   1  -1  10  445.97   10.29
   1   1  10  437.13   10.20
   1  -1  10  439.91   10.44
  -1   1 -10  431.83   10.33
   1   1  11  217.75    7.05
   1   1  11  225.55    7.40
  -1  -1 -11  218.75    7.28
  -1   1 -11  221.00    7.28
   1   1  11  212.16    7.21
   1  -1  11  224.45    6.33
   1  -1  11  221.61    7.17
  -1   1 -11  223.74    7.10
  -1  -1 -11  225.20    7.44
   1   1  11  221.89    7.15
   1  -1  11  214.27    7.25
   1   1  12  654.41   14.54
   1   1  12  656.86   14.25
   1   1  12  631.84   13.97
  -1   1 -12  638.59   14.34
   1  -1  12  644.05   12.44
   1  -1  12  648.42   14.22
   1  -1  12  655.80   14.59
  -1  -1 -12  651.03   14.45
   1   1  12  652.36   14.61
   1  -1  12  650.90   12.60
   1   1  12  619.58   14.26
  -1  -1 -12  646.48   14.57
  -1   1 -12  660.21   14.18
   1   1  13   72.10    4.49
  -1   1 -13   67.21    4.22
  -1   1 -13   67.89    4.26
  -1  -1 -13   69.90    4.38
   1   1  13   70.84    4.34
   1   1  13   71.97    4.29
   1   1  13   76.47    4.60
   1  -1  13   70.58    3.61
   1  -1  13   76.16    4.50
   1   1  13   68.93    4.43
   1  -1  13   68.09    3.51
   1  -1  13   74.26    4.59
  -1  -1 -13   66.45    4.34
  -1  -1 -14    6.08    1.33
   1   1  14    6.41    1.52
  -1   1 -14    7.90    1.57
  -1   1 -14    4.91    1.37
   1   1  14    6.44    1.51
   1  -1  14    6.34    1.19
   1   1  14    6.99    1.55
   1   1  14    8.87    1.63
   1  -1  14    6.56    1.40
   1  -1  14    6.86    1.56
  -1  -1 -14    8.18    1.65
   1   1  14    7.40    1.59
  -1  -1 -15  162.32    7.42
  -1  -1 -15  180.91    7.92
   1   1  15  166.30    7.47
   1  -1  15  177.54    7.64
   1   1  15  167.77    7.39
  -1   1 -15  177.70    7.60
   1  -1  15  173.29    7.75
   1   1  15  166.28    7.18
   1   1  15  171.19    7.71
  -1   1 -15  170.61    7.48
  -1  -1 -16  127.15    6.80
  -1   1 -16  134.82    6.88
  -1   1 -16  141.29    7.02
   1   1  16  126.04    6.35
   1   1  16  141.07    7.18
   1  -1  16  131.81    6.96
   1   1  16  137.70    6.96
   1  -1  16  138.97    7.03
   1  -1  16  131.46    6.69
  -1  -1 -16  135.00    7.13
   1   1  16  137.54    7.05
  -1  -1 -17  138.73    7.57
   1   1  17  149.28    7.72
   1  -1  17  150.30    7.58
  -1   1 -17  149.12    4.11
  -1   1 -17  157.30    7.69
   1   1  17  156.63    7.32
  -1  -1 -17  149.82    4.10
  -1   1 -17  157.74    7.71
  -1  -1 -17  148.90    4.11
  -1   1 -17  144.53    4.09
   1   1  17  154.40    7.70
   1  -1  17  147.07    6.70
   1  -1  17  147.55    7.36
  -1   1 -17  144.86    4.02
  -1   1 -18    7.10    0.97
  -1  -1 -18    6.81    0.94
  -1   1 -18    7.48    1.84
   1   1  18    4.91    1.47
   1   1  18    7.27    1.81
  -1  -1 -18    7.53    0.96
   1  -1  18    5.94    1.61
  -1   1 -18    7.28    0.93
   1  -1  18    5.38    1.52
  -1   1 -18    7.91    0.96
   1  -1  18    7.06    0.89
  -1  -1 -18    7.61    1.91
  -1  -1 -18    6.78    0.91
  -1  -1 -18    7.99    0.94
  -1   1 -18    7.59    0.95
  -1   1 -18    6.23    1.55
   1   1  19    2.98    0.69
   1  -1  19    2.95    1.26
  -1  -1 -19    3.01    0.71
  -1   1 -19    3.01    0.73
  -1  -1 -19    3.36    0.71
   1   1  19    3.11    1.46
   1   1  19    3.66    1.62
  -1   1 -19    3.94    0.76
  -1   1 -19    3.73    1.33
   1  -1  19    2.36    0.65
  -1   1 -19    3.58    1.48
   1  -1  19    2.26    1.22
  -1  -1 -19    3.91    0.75
  -1   1 -19    2.57    0.70
  -1  -1 -19    1.29    0.94
  -1   1 -19    3.23    0.67
   1   1  20   23.11    3.18
   1  -1  20   20.74    1.57
  -1  -1 -20   21.58    1.58
  -1   1 -20   22.94    3.26
  -1   1 -20   20.61    1.54
  -1   1 -20   23.87    1.67
   1   1  20   19.96    3.19
   1  -1  20   22.07    1.54
  -1  -1 -20   21.80    1.55
   1  -1  20   19.32    3.12
   1   1  20   19.54    3.13
  -1   1 -20   23.10    1.55
   1  -1  20   18.91    2.78
  -1  -1 -20   21.50    1.51
  -1  -1 -20   22.53    3.35
   1   1  20   22.22    3.09
   1   1  20   20.42    1.46
  -1   1 -20   19.35    1.51
   1   1  21    6.27    1.63
   1   1  21    4.68    0.76
  -1  -1 -21    5.30    0.81
   1  -1  21    4.64    0.79
  -1  -1 -21    4.46    0.81
  -1   1 -21    5.50    0.85
   1   1  21    3.60    1.38
  -1   1 -21    3.86    0.82
  -1   1 -21    4.44    0.75
  -1   1 -21    5.13    0.85
   1  -1  21    4.70    1.49
  -1  -1 -21    4.71    0.80
   1  -1  21    4.45    0.75
   1  -1  22    4.14    0.77
  -1   1 -22    3.46    0.81
   1  -1  22    4.22    0.77
   1  -1  22    3.53    1.36
  -1  -1 -22    4.10    0.80
   1   1  22    3.03    0.61
  -1   1 -22    2.96    0.64
   1   1  22    5.04    1.85
  -1  -1 -22    3.57    0.70
  -1   1 -22    3.51    0.69
  -1  -1 -22    4.36    0.80
   1   1  23   62.10    2.32
  -1  -1 -23   60.10    2.55
  -1  -1 -23   61.21    2.66
  -1   1 -23   61.92    2.65
   1  -1  23   58.73    2.57
   1  -1  23   60.45    4.94
  -1   1 -23   60.67    2.62
   1  -1  23   60.53    2.71
   1   1  23   67.22    5.42
   1  -1  23   58.16    2.39
   1   1  23   60.88    2.56
   1  -1  24    2.28    0.64
   1   1  24    3.54    1.51
  -1  -1 -24    1.73    0.56
  -1  -1 -24    0.75    0.47
  -1   1 -24    3.14    0.70
   1  -1  24    2.89    0.64
   1   1  24    2.41    0.66
  -1   1 -24    1.98    0.61
   1  -1  25   40.92    2.07
   1  -1  25   40.32    1.94
   1   1  25   42.80    2.10
  -1  -1 -25   39.93    1.88
  -1   1 -25   40.40    1.92
   1  -1  25   41.93    2.08
   1   1  25   42.81    1.95
  -1  -1 -25   44.11    2.07
  -1   1 -25   38.32    1.90
  -1   1 -26    3.44    0.60
   1  -1  26    4.73    0.70
   1   1  26    3.14    0.58
  -1   1 -26    2.47    0.57
   1  -1  26    4.75    0.73
  -1  -1 -26    3.30    0.59
  -1  -1 -26    3.21    0.61
   1  -1  26    2.95    0.55
   1   1  26    3.16    0.62
   1   1  27    5.53    0.70
  -1   1 -27    5.09    0.64
  -1  -1 -27    5.03    0.63
  -1   1 -27    5.28    0.60
   1   1  27    4.33    0.60
  -1  -1 -27    5.05    0.58
   1  -1  27    4.20    0.63
   1   1  27    5.10    0.60
   1  -1  27    5.21    0.68
   1  -1  28   12.24    0.86
  -1  -1 -28   12.82    0.84
   1   1  28   12.43    0.88
   1   1  28   12.74    0.86
  -1   1 -28   12.48    0.79
  -1   1 -28   13.81    0.80
   1  -1  28   12.79    0.88
   1   1  29    7.83    0.56
   1  -1  29    7.99    0.60
   1  -1  29    7.49    0.56
   1   1  29    6.97    0.56
   1   2 -29    8.39    0.58
  -1   2  29    8.39    0.58
  -1   2  29    8.31    0.62
  -1  -2  29    8.24    0.59
  -1  -2  28    1.84    0.40
  -1   2  28    1.59    0.40
   1   2 -28    2.01    0.43
   1  -2 -28    1.77    0.35
  -1  -2  28    1.45    0.36
  -1   2  28    1.23    0.35
   1  -2 -28    2.25    0.39
  -1  -2  27   13.23    0.82
   1   2 -27   14.93    1.04
  -1   2  27   13.92    0.89
  -1   2  27   16.08    1.06
  -1  -2  27   11.77    0.93
   1  -2 -27   15.08    0.98
  -1  -2  27   13.49    1.00
   1  -2 -27   13.25    0.93
  -1  -2  27   13.82    1.01
   1  -2 -26    7.41    0.82
  -1   2  26    7.91    0.79
   1  -2 -26    7.99    0.80
   1   2 -26    7.13    0.86
  -1  -2  26    6.56    0.78
  -1  -2  26    7.73    0.85
  -1   2  25   13.70    1.13
   1  -2 -25   13.34    1.13
  -1  -2  25   12.17    1.13
  -1  -2  25   14.20    1.22
   1   2 -25   13.61    1.18
   1  -2 -25   13.63    1.12
  -1   2  25   11.08    2.21
   1  -2 -24   41.99    2.08
   1  -2 -24   40.97    2.04
  -1  -2  24   39.57    2.09
  -1   2  24   41.56    1.99
  -1  -2  24   42.89    2.18
   1   2 -24   39.96    2.10
  -1   2  24   42.64    4.39
  -1  -2  23   38.17    2.11
   1   2 -23   39.29    2.13
  -1  -2  23   35.88    1.88
  -1   2  23   35.50    4.06
  -1   2  23   37.93    1.98
   1  -2 -23   38.69    2.07
   1  -2 -23   37.35    2.01
  -1  -2  23   36.50    2.09
  -1  -2  22   75.25    3.06
  -1  -2  22   72.52    3.06
  -1  -2  22   69.85    2.77
   1   2 -22   73.84    3.03
   1  -2 -22   74.10    3.00
   1   2 -22   76.99    3.09
   1  -2 -22   74.10    2.96
  -1   2  22   74.61    6.02
   1   2 -22   71.43    2.72
   1   2 -21   10.82    1.13
   1   2 -21   11.49    1.23
   1  -2 -21   13.08    1.35
   1   2 -21   13.00    1.29
  -1  -2  21   11.59    1.19
   1  -2 -21   13.40    1.31
  -1  -2  21   12.92    1.31
  -1   2  21   11.67    2.46
  -1   2  21   11.24    2.50
   1  -2 -20   51.56    2.48
   1   2 -20   50.95    2.48
   1  -2 -20   51.97    2.49
   1   2 -20   47.82    2.30
  -1  -2  20   51.26    2.51
   1   2 -20   53.90    4.98
  -1   2  20   51.25    4.91
   1   2 -20   49.33    2.45
  -1   2  20   53.18    4.98
  -1  -2  20   47.47    2.30
  -1  -2  20   49.44    4.73
   1  -2 -19    2.70    0.77
  -1  -2  19   -0.55    1.22
   1  -2 -19    1.95    1.35
  -1   2  19    2.03    1.82
   1  -2 -19    2.51    0.62
  -1   2  19   -0.09    1.07
  -1  -2  19    3.06    0.66
  -1   2  19    3.47    1.55
   1   2 -19    2.37    0.62
  -1   2  19    2.32    1.47
   1   2 -19    2.45    1.30
   1   2 -19    2.16    0.60
  -1  -2  19    1.38    1.00
  -1   2  19    1.66    1.02
   1   2 -19    2.84    0.65
  -1  -2  19    2.25    0.74
   1   2 -18   39.54    2.06
   1   2 -18   39.85    2.13
   1   2 -18   39.37    2.10
   1   2 -18   44.15    4.22
  -1  -2  18   39.71    2.04
  -1  -2  18   36.78    1.88
  -1   2  18   40.62    4.08
  -1  -2  18   35.83    3.91
   1  -2 -18   44.01    4.41
  -1   2  18   35.57    3.82
   1  -2 -18   39.47    2.14
  -1   2  18   45.01    4.26
  -1   2  18   35.77    3.87
  -1   2  18   40.35    4.25
  -1  -2  18   40.41    2.18
   1  -2 -18   41.40    2.16
  -1  -2  18   38.28    3.92
   1  -2 -18   40.19    2.12
  -1   2  17   26.54    3.22
  -1  -2  17   27.88    3.16
   1   2 -17   25.25    1.55
  -1   2  17   26.05    3.22
  -1  -2  17   25.39    1.67
  -1   2  17   23.45    3.06
  -1   2  17   27.85    3.30
   1  -2 -17   25.80    1.65
   1  -2 -17   23.87    1.67
  -1  -2  17   26.54    1.65
  -1  -2  17   25.07    3.22
   1  -2 -17   27.14    3.45
   1  -2 -17   27.03    1.70
   1   2 -17   26.81    3.17
   1   2 -17   26.65    1.69
   1   2 -17   26.27    1.66
   1  -2 -16   43.65    4.08
   1   2 -16   42.05    3.80
  -1   2  16   40.88    3.82
  -1   2  16   40.25    3.77
  -1  -2  16   38.56    3.39
  -1   2  16   38.27    3.73
  -1  -2  16   35.50    3.65
  -1   2  15  206.46    7.99
  -1   2  15  200.32    8.33
   1   2 -15  200.48    7.97
  -1  -2  15  185.92    7.28
  -1  -2  15  193.13    8.27
   1   2 -15  201.90    8.13
  -1  -2  15  199.18    7.99
  -1   2  15  202.55    8.25
   1  -2 -15  201.05    8.51
  -1   2  15  197.84    8.27
  -1  -2  14    0.90    0.78
  -1   2  14    0.64    0.79
   1   2 -14    1.15    0.93
   1  -2 -14    1.03    0.66
  -1  -2  14   -0.40    0.77
  -1   2  14    0.92    0.78
  -1   2  14    0.51    0.66
  -1   2  14    1.17    0.92
   1   2 -14    0.64    0.69
  -1  -2  14    0.49    0.77
   1   2 -13   98.97    5.04
  -1   2  13   97.62    4.95
  -1   2  13  100.81    5.42
  -1   2  13   99.04    5.20
  -1  -2  13  100.22    4.78
  -1  -2  13   99.12    5.42
  -1   2  13  101.39    5.37
   1   2 -13  105.93    5.27
  -1  -2  13  102.26    5.12
   1  -2 -13  109.32    5.63
   1   2 -13  106.05    5.07
  -1   2  13  100.34    5.26
   1   2 -12   11.66    1.67
   1   2 -12   12.95    1.81
  -1  -2  12   12.33    1.74
  -1  -2  12   11.31    1.60
  -1   2  12   12.59    1.82
  -1  -2  12   12.00    1.82
  -1   2  12   10.80    1.54
  -1   2  12   11.63    1.75
   1  -2 -12    9.63    1.68
  -1   2  12   13.65    1.84
  -1   2  12   13.03    1.92
   1   2 -12   11.53    1.62
  -1   2  11  219.01    7.35
  -1  -2  11  215.73    6.94
   1   2 -11  224.95    7.13
  -1   2  11  217.39    7.18
  -1  -2  11  217.43    7.44
   1   2 -11  210.34    6.89
   1   2 -11  212.29    6.82
  -1  -2  11  213.31    6.54
  -1   2  11  219.16    6.96
   1  -2 -11  226.53    7.52
  -1   2  11  224.32    7.38
  -1   2  11  221.13    7.51
  -1   2  10   51.14    3.32
   1   2 -10   51.92    3.12
   1   2 -10   45.39    2.89
  -1  -2  10   49.36    2.83
   1  -2 -10   50.40    3.25
  -1   2  10   51.34    3.19
  -1  -2  10   49.59    3.29
  -1  -2  10   47.70    2.94
  -1   2  10   50.56    2.99
   1   2 -10   46.53    2.96
  -1   2  10   48.45    3.18
   1   2  -9   26.94    2.12
  -1  -2   9   28.29    2.32
   1   2  -9   30.45    2.24
  -1  -2   9   26.04    2.06
   1  -2  -9   29.76    2.38
  -1   2   9   27.71    1.20
  -1  -2   9   26.36    1.98
  -1   2   9   27.14    2.07
   1  -2  -9   28.50    2.10
   1   2  -9   26.71    2.10
  -1   2   9   27.95    2.28
   1   2  -9   27.22    2.38
  -1   2   9   30.40    2.35
  -1   2   8  199.51    5.94
   1   2  -8  197.78    6.38
  -1   2   8  197.59    5.25
  -1  -2   8  195.39    5.33
  -1  -2   8  200.62    6.11
  -1   2   8  206.42    4.07
   1   2  -8  199.71    5.75
  -1  -2   8  199.48    5.60
   1  -2  -8  200.15    5.61
  -1   2   8  198.36    4.49
   1  -2  -8  207.80    6.17
   1   2  -8  193.65    5.68
  -1   2   7  106.40    3.93
  -1  -2   7  105.22    3.54
  -1   2   7  106.11    3.00
  -1   2   7  110.83    2.83
  -1   2   7  106.32    3.44
   1  -2  -7  103.27    3.73
   1  -2  -7  105.34    4.02
   1   2  -7  107.23    3.79
  -1  -2   7  101.65    3.59
  -1  -2   6  623.51   10.59
   1  -2  -6  627.78   11.31
  -1   2   6  646.38    9.62
   1  -2  -6  634.13   11.02
   1   2  -6  633.49   10.85
  -1   2   6  626.89   10.37
  -1   2   5   49.08    1.83
  -1  -2   5   48.06    2.03
   1  -2  -5   49.65    2.25
  -1  -2   5   45.91    1.28
   1   2  -5   50.00    2.16
   1  -2  -5   45.80    2.26
   1   2  -4   61.41    2.45
  -1  -2   4   57.94    1.99
  -1   2   4   59.62    2.08
   1  -2  -4   58.61    2.33
   1   2  -4   52.96    2.09
   1   2  -4   57.55    2.44
  -1  -2   4   58.48    1.45
   1  -2  -4   58.45    2.34
  -1  -2   3  153.60    3.14
   1   2  -3  156.55    4.14
   1   2  -3  158.37    4.00
  -1   2   3  159.88    3.65
   1  -2  -3  154.48    3.93
  -1  -2   3  159.37    2.89
   1  -2  -3  154.90    3.67
  -1   2   2   53.86    1.50
   1   2  -2   53.32    2.12
  -1  -2   2   54.32    1.35
  -1  -2   2   54.52    1.58
   1  -2  -2   51.66    1.74
   1   2  -2   52.49    2.02
  -1   2   1  168.33    3.21
   1   2  -1  163.43    3.71
   1  -2  -1  159.60    3.77
  -1   2   1  172.06    3.71
   1  -2  -1  162.15    3.01
  -1  -2   1  165.48    3.38
  -1  -2   0  133.46    3.16
  -1   2   0  138.50    2.94
   1  -2   0  134.39    3.15
   1   2   0  136.89    3.51
   1  -2   0  134.24    2.24
   1   2   0  131.79    3.24
   1  -2   1  172.45    3.70
  -1   2  -1  179.15    3.14
   1   2   1  173.05    3.85
   1   2   1  186.15    4.14
   1   2   1  179.72    4.02
   1  -2   1  170.04    3.44
   1   2   1  170.60    2.79
  -1  -2  -1  177.38    4.00
  -1  -2  -2   49.92    2.11
   1   2   2   50.24    1.94
   1  -2   2   50.32    1.88
   1   2   2   53.79    1.94
   1  -2   2   51.06    1.48
   1   2   2   53.50    1.53
   1  -2   3  138.86    3.47
  -1  -2  -3  134.12    3.63
  -1  -2  -3  140.44    3.71
  -1   2  -3  135.40    2.74
   1   2   3  138.41    3.28
   1  -2   3  130.42    2.35
   1   2   3  143.03    3.16
   1   2   4   54.33    1.88
  -1   2  -4   53.34    2.40
  -1  -2  -4   53.04    2.33
  -1   2  -4   54.35    1.82
  -1  -2  -4   53.96    2.29
   1   2   4   54.85    2.07
   1  -2   4   52.90    2.17
   1  -2   5   53.21    2.32
  -1   2  -5   53.92    2.04
   1   2   5   58.52    2.34
   1   2   5   55.78    2.42
  -1  -2  -5   53.53    2.51
  -1   2  -5   51.40    2.48
  -1  -2  -5   51.17    2.33
  -1   2  -5   54.38    2.09
  -1   2  -6  604.29   10.21
   1  -2   6  638.97   10.94
  -1  -2  -6  621.07   11.33
  -1   2  -6  622.85    9.92
  -1   2  -6  622.70   11.25
   1   2   6  624.84   10.88
   1  -2   6  642.81   11.03
  -1  -2  -6  627.17   10.77
   1   2   6  615.06   10.74
   1   2   6  615.15   11.16
   1   2   7  113.72    4.14
   1  -2   7  111.19    2.59
   1   2   7  113.21    3.91
  -1   2  -7  116.12    3.78
   1   2   7  113.63    3.97
   1  -2   7  117.34    4.01
  -1  -2  -7  116.15    3.89
  -1   2  -7  112.58    3.19
   1  -2   7  109.81    4.10
   1  -2   7  116.11    4.08
  -1   2  -7  118.15    4.27
  -1  -2  -7  115.77    4.20
  -1   2  -7  113.81    3.33
  -1   2  -7  116.65    4.17
  -1  -2  -7  116.58    4.33
   1  -2   8  176.20    3.80
  -1  -2  -8  178.75    5.19
   1  -2   8  183.31    5.35
   1   2   8  180.25    5.27
  -1  -2  -8  176.92    5.63
  -1   2  -8  173.91    4.16
  -1   2  -8  172.13    5.58
   1  -2   8  171.01    5.41
   1   2   8  178.16    3.45
  -1   2  -8  178.96    5.58
   1  -2   8  181.30    5.73
  -1   2  -8  165.88    5.07
   1   2   8  169.34    5.49
   1   2   8  172.69    5.38
  -1  -2  -8  170.30    5.66
   1   2   8  178.51    5.12
  -1   2  -9   33.38    2.49
   1   2   9   26.82    1.96
   1  -2   9   30.99    1.56
   1   2   9   31.43    2.30
   1  -2   9   29.85    2.21
  -1  -2  -9   30.39    2.14
   1   2   9   31.34    2.19
   1  -2   9   30.60    2.44
  -1  -2  -9   31.28    2.46
  -1   2  -9   33.79    2.32
  -1   2  -9   33.12    2.48
  -1  -2  -9   32.61    2.54
  -1   2  -9   31.62    2.43
   1  -2   9   30.77    2.33
   1   2   9   28.72    2.31
  -1   2 -10   44.17    2.79
  -1   2 -10   43.17    2.97
  -1  -2 -10   45.82    2.67
   1  -2  10   43.91    2.65
  -1   2 -10   39.48    2.83
   1   2  10   40.27    2.75
   1  -2  10   41.50    1.96
   1   2  10   43.19    2.84
   1   2  10   44.34    3.08
   1  -2  10   42.89    2.90
   1  -2  10   40.14    2.93
  -1  -2 -10   40.23    2.91
   1   2  10   42.35    2.57
  -1   2 -10   43.43    3.01
  -1  -2 -10   41.97    3.05
  -1   2 -11  212.43    7.14
  -1   2 -11  221.02    6.92
   1  -2  11  211.24    7.05
   1  -2  11  206.88    6.70
   1   2  11  219.57    7.13
  -1   2 -11  211.89    7.18
  -1  -2 -11  216.47    7.33
   1   2  11  203.95    7.17
   1   2  11  210.71    7.37
   1  -2  11  210.80    7.29
   1  -2  11  205.65    5.15
   1  -2  11  215.55    6.45
   1   2  11  212.12    6.16
  -1  -2 -11  218.02    7.51
   1   2  11  211.75    6.96
   1   2  12   11.42    1.75
   1   2  12   10.95    1.47
   1  -2  12   12.34    1.55
   1  -2  12   10.64    1.70
  -1  -2 -12   12.64    1.82
   1  -2  12   10.07    1.58
  -1  -2 -12    9.71    1.57
   1   2  12    9.28    1.63
  -1   2 -12   10.37    1.62
   1   2  12   13.70    1.84
  -1   2 -12    9.68    1.60
   1   2  12    9.19    1.53
  -1   2 -12    8.08    1.48
   1  -2  13   94.84    4.33
   1   2  13   93.43    4.94
  -1   2 -13   95.05    5.13
   1  -2  13   94.62    5.07
   1   2  13  101.65    5.48
  -1  -2 -13  101.05    5.34
   1   2  13   98.03    5.28
   1  -2  13   95.83    4.90
   1  -2  13  100.32    4.35
   1   2  13  104.29    5.28
  -1  -2 -13   99.15    5.43
  -1   2 -13   94.95    4.93
   1  -2  14    1.67    0.85
   1   2  14    0.66    0.73
   1   2  14    1.78    0.97
   1   2  14    1.26    1.03
   1   2  14    2.60    1.22
  -1  -2 -14   -0.18    0.72
  -1  -2 -14    0.80    0.90
   1  -2  14    0.07    0.68
  -1   2 -14    0.30    0.67
   1   2  14    0.75    0.85
  -1   2 -14    1.12    0.84
  -1   2 -15  220.51    8.63
   1   2  15  214.17    8.67
   1   2  15  225.13    9.05
  -1   2 -15  223.81    8.51
   1  -2  15  216.40    8.23
   1   2  15  210.19    8.12
   1  -2  15  221.34    8.65
   1   2  15  219.67    8.59
   1   2  15  224.97    8.96
  -1  -2 -15  225.42    9.14
   1  -2  16   43.05    3.72
  -1  -2 -16   39.95    3.92
  -1   2 -16   39.51    3.73
   1   2  16   38.34    3.51
   1   2  16   38.54    3.85
   1   2  16   39.66    3.74
   1  -2  16   38.48    3.67
   1   2  16   42.07    3.89
  -1   2 -16   38.99    3.64
   1   2  16   40.31    3.89
   1   2  17   29.97    3.43
  -1   2 -17   27.66    1.72
  -1  -2 -17   31.72    3.65
  -1   2 -17   27.32    3.22
   1   2  17   27.54    3.43
  -1   2 -17   28.09    3.30
   1  -2  17   29.39    1.68
   1   2  17   29.20    3.35
  -1   2 -17   27.28    1.65
   1  -2  17   30.10    3.23
   1   2  17   27.88    3.34
   1  -2  17   34.21    3.64
   1  -2  17   27.91    1.73
  -1   2 -17   30.33    1.78
  -1  -2 -17   30.86    1.80
  -1  -2 -18   38.19    2.02
   1  -2  18   33.23    3.57
   1   2  18   36.64    3.88
  -1   2 -18   38.27    2.02
   1   2  18   37.13    3.87
   1   2  18   38.81    4.15
  -1  -2 -18   40.62    4.26
   1   2  18   37.17    3.80
   1  -2  18   38.70    4.00
  -1   2 -18   39.13    3.96
  -1   2 -18   38.17    3.84
   1  -2  18   33.87    1.90
   1  -2  18   35.73    2.02
  -1   2 -18   37.32    2.04
  -1  -2 -18   36.90    1.91
  -1  -2 -18   35.81    1.93
  -1   2 -18   38.66    2.07
   1  -2  19    1.48    1.26
  -1   2 -19    2.20    0.64
  -1   2 -19    2.87    0.67
  -1   2 -19    2.44    0.65
  -1   2 -19    0.49    1.13
   1  -2  19    2.55    0.61
   1   2  19    3.58    1.60
  -1  -2 -19    2.47    0.68
   1   2  19    5.12    1.79
   1  -2  19    2.00    0.65
  -1  -2 -19    2.00    0.56
   1   2  19    0.75    1.26
  -1  -2 -19    0.79    1.06
   1  -2  19    3.09    1.06
  -1   2 -19    1.82    1.23
  -1   2 -20   46.65    4.48
  -1  -2 -20   47.13    2.31
  -1   2 -20   43.40    2.29
  -1  -2 -20   47.00    2.40
  -1  -2 -20   47.47    2.35
   1  -2  20   44.04    2.18
  -1   2 -20   48.38    2.33
  -1   2 -20   47.99    2.39
   1  -2  20   46.24    4.25
   1  -2  20   45.27    2.32
   1   2  20   50.45    4.83
   1  -2  21   10.73    1.14
  -1  -2 -21   10.76    1.10
  -1   2 -21   11.44    1.19
  -1   2 -21   11.46    1.18
  -1  -2 -21   12.31    1.27
   1   2  21    9.03    2.16
   1   2  21   12.09    2.57
   1   2  21    9.09    2.09
  -1   2 -21   12.93    1.25
   1  -2  21   10.90    1.08
  -1  -2 -21   10.44    1.16
   1   2  22   80.70    6.17
  -1  -2 -22   74.37    2.84
   1  -2  22   75.91    3.00
   1  -2  22   74.57    2.81
  -1  -2 -22   75.25    2.98
  -1   2 -22   75.13    3.02
  -1   2 -22   76.65    3.03
   1  -2  22   75.51    3.08
  -1  -2 -22   78.10    3.10
   1  -2  23   33.27    1.97
  -1   2 -23   35.04    1.99
  -1   2 -23   33.72    1.97
  -1  -2 -23   35.08    2.01
   1  -2  23   31.86    1.87
  -1  -2 -23   32.54    1.79
   1   2  23   34.76    3.99
  -1  -2 -24   36.51    1.82
   1  -2  24   38.32    1.97
  -1  -2 -24   38.29    2.03
   1   2  24   38.58    1.91
   1  -2  24   37.40    2.01
  -1   2 -24   40.40    1.94
   1  -2  24   38.22    2.06
  -1   2 -24   37.84    2.00
   1   2  24   40.78    4.18
  -1   2 -24   37.36    1.99
   1  -2  25   11.91    1.11
   1   2  25   13.18    1.06
  -1   2 -25   12.92    1.14
   1  -2  25   12.48    1.08
   1  -2  25   13.21    1.17
  -1  -2 -25   14.49    1.20
  -1  -2 -25   11.70    0.99
  -1   2 -25   12.82    1.03
  -1   2 -26    7.79    0.81
  -1  -2 -26    6.50    0.68
   1   2  26    7.32    0.83
   1  -2  26    5.86    0.79
   1   2  26    7.37    0.76
  -1   2 -26    7.74    0.76
  -1  -2 -26    7.63    0.83
   1  -2  26    7.37    0.83
   1   2  27   13.61    0.97
   1  -2  27   11.76    0.91
  -1   2 -27   12.88    0.93
   1   2  27   12.36    0.83
  -1   2 -27   13.02    0.83
   1  -2  27   12.89    0.98
  -1  -2 -27   12.44    0.94
  -1  -2 -28    1.80    0.39
   1  -2  28    2.52    0.44
   1   2  28    2.31    0.43
   1  -2  28    2.19    0.40
  -1   2 -28    1.52    0.35
   1   2  28    2.06    0.41
   1  -2  28    1.08    0.32
   1  -2  28    1.77    0.37
   1   2  29   10.86    0.68
  -1  -3  28   12.25    0.70
   1   3 -28   13.10    0.85
   1  -3 -28   14.84    0.83
  -1   3  28   13.93    0.82
  -1  -3  28   13.43    0.82
   1   3 -27  166.50    3.70
  -1  -3  27  153.73    3.58
  -1   3  27  166.86    3.64
   1  -3 -27  164.17    3.54
  -1  -3  27  159.19    3.20
  -1  -3  27  150.69    3.36
  -1  -3  26    1.26    0.47
  -1  -3  26    2.46    0.51
   1  -3 -26    1.27    0.41
  -1   3  26    1.47    0.42
   1  -3 -26    2.20    0.53
  -1  -3  26    1.73    0.51
   1   3 -26    1.93    0.50
  -1  -3  26    1.13    0.47
   1   3 -25   37.77    1.89
  -1  -3  25   38.28    1.91
   1  -3 -25   39.54    1.89
  -1   3  25   38.95    1.71
   1  -3 -25   37.17    1.78
  -1  -3  25   37.22    1.90
  -1  -3  25   35.22    1.80
  -1   3  24    8.34    2.11
  -1   3  24    9.50    0.99
  -1  -3  24    7.23    1.89
   1  -3 -24    6.50    0.86
   1  -3 -24    7.44    0.90
  -1  -3  24    6.09    0.90
  -1  -3  24    6.62    0.93
   1   3 -24    7.10    0.96
   1   3 -23  146.67    4.29
   1  -3 -23  148.18    4.18
   1   3 -23  141.37    3.83
  -1   3  23  158.89    8.60
  -1  -3  23  148.07    8.38
   1  -3 -23  147.72    4.25
   1   3 -23  146.36    4.28
  -1  -3  23  144.24    4.31
  -1  -3  23  149.60    4.36
   1   3 -22   12.79    1.18
  -1   3  22   12.00    2.51
   1  -3 -22   13.81    1.31
   1   3 -22   12.15    1.25
   1   3 -22   11.49    1.19
  -1  -3  22   12.03    1.28
   1  -3 -22   12.13    1.26
  -1  -3  22   11.77    1.25
   1   3 -21  395.87    7.82
  -1  -3  21  405.61    8.33
  -1   3  21  416.90   14.73
   1   3 -21  402.18    8.20
  -1   3  21  397.62   14.33
   1  -3 -21  407.64    8.20
  -1  -3  21  405.24    8.32
   1  -3 -21  407.12    8.14
  -1  -3  21  392.50    7.90
   1   3 -21  398.89    8.18
   1   3 -20   63.41    2.79
  -1  -3  20   61.23    2.81
  -1   3  20   58.28    5.11
   1  -3 -20   66.85    2.86
  -1   3  20   57.43    5.19
   1   3 -20   59.55    2.63
  -1  -3  20   60.26    2.64
  -1  -3  20   64.37    2.88
   1  -3 -20   64.23    2.77
  -1   3  20   63.91    5.44
   1   3 -20   62.52    2.78
   1  -3 -19    4.03    0.77
   1   3 -19    3.98    0.78
   1  -3 -19    3.79    1.66
   1   3 -19    4.19    0.84
  -1   3  19    3.35    1.50
  -1   3  19    6.26    2.04
  -1  -3  19    4.05    0.76
   1  -3 -19    3.68    0.71
  -1   3  19    4.58    1.65
  -1  -3  19    4.22    0.88
  -1  -3  19    7.62    1.92
  -1  -3  19    2.48    0.68
  -1   3  19    2.83    1.35
   1   3 -19    2.65    0.70
   1   3 -18   12.15    1.11
  -1   3  18   15.02    2.93
   1   3 -18   13.26    1.26
  -1  -3  18   11.62    1.23
   1  -3 -18   10.88    2.41
   1  -3 -18   13.02    1.23
  -1   3  18   14.28    2.54
  -1  -3  18   13.70    2.43
   1   3 -18   12.70    1.24
   1   3 -18   12.88    1.27
  -1  -3  18   11.28    1.16
  -1  -3  18   11.66    1.27
  -1   3  18   11.61    2.33
   1  -3 -18   11.69    1.18
   1   3 -18   11.26    2.25
  -1   3  18   12.82    2.53
   1  -3 -17   11.93    1.13
  -1   3  17   14.22    2.49
  -1   3  17   11.26    2.32
   1  -3 -17   12.27    1.18
  -1  -3  17   12.57    1.18
  -1  -3  17   16.90    1.44
  -1   3  17   13.55    2.29
   1   3 -17   11.55    1.16
   1  -3 -17   15.09    2.55
  -1  -3  17   13.55    2.29
  -1   3  17    9.11    1.92
   1   3 -17   12.43    2.19
   1   3 -17   11.48    1.15
   1  -3 -17   13.65    1.26
   1   3 -17   12.88    1.12
   1   3 -17   12.71    1.21
   1   3 -16   16.38    1.30
   1   3 -16   15.83    1.28
   1  -3 -16   14.85    2.52
  -1   3  16   12.37    2.27
   1   3 -16   11.27    1.96
   1  -3 -16   16.43    1.34
  -1   3  16   13.50    2.30
  -1   3  16   15.72    2.55
  -1  -3  16   13.53    1.23
   1  -3 -16   14.47    1.24
  -1  -3  16   16.35    2.36
  -1   3  16   14.25    2.17
  -1  -3  16   13.92    2.41
  -1   3  15  198.56    8.28
  -1   3  15  200.71    7.98
  -1   3  15  198.00    8.54
  -1  -3  15  192.09    8.31
   1   3 -15  191.65    7.77
  -1   3  15  195.02    8.62
   1  -3 -15  203.83    8.75
  -1   3  15  198.82    8.36
   1   3 -15  205.70    8.12
  -1  -3  15  196.36    7.93
   1  -3 -14   21.66    2.72
  -1  -3  14   21.53    2.65
  -1   3  14   22.08    2.62
   1   3 -14   21.31    2.44
   1   3 -14   21.84    2.45
  -1   3  14   20.61    2.64
  -1   3  14   22.13    2.55
  -1  -3  14   22.49    2.52
  -1   3  14   21.62    2.76
  -1   3  14   21.12    2.61
   1   3 -14   22.37    2.57
  -1   3  13  103.12    5.44
   1   3 -13  107.25    5.25
   1   3 -13   98.74    5.25
  -1  -3  13   99.85    5.05
   1   3 -13  103.14    5.15
  -1   3  13  113.97    5.63
  -1   3  13  104.85    5.76
  -1   3  13  103.83    5.58
   1  -3 -13  106.21    5.65
  -1   3  13  108.97    5.30
  -1  -3  13  101.94    5.52
   1   3 -12    1.01    0.67
   1   3 -12    1.94    0.95
  -1   3  12    0.62    0.71
  -1   3  12    1.66    0.97
  -1  -3  12    1.34    0.65
   1   3 -12    1.35    0.76
  -1   3  12    0.97    0.76
  -1  -3  12    1.88    1.03
  -1   3  12    0.30    0.61
   1  -3 -12    0.76    0.67
   1   3 -11  520.12   12.25
  -1  -3  11  514.98   11.54
   1   3 -11  512.04   11.57
  -1  -3  11  494.80   12.23
   1   3 -11  512.76   11.68
  -1   3  11  524.41   12.19
   1   3 -11  487.68   12.76
  -1   3  11  502.22   11.64
  -1   3  11  526.33   12.95
  -1   3  11  509.87   12.35
   1  -3 -11  514.59   12.48
   1   3 -10   35.89    2.51
  -1   3  10   37.29    2.74
   1   3 -10   36.20    2.57
   1   3 -10   36.50    3.05
  -1  -3  10   35.85    2.80
   1  -3 -10   38.84    2.96
  -1   3  10   36.53    2.50
  -1   3  10   36.56    2.82
  -1  -3  10   35.30    2.49
   1   3 -10   38.75    2.88
   1   3 -10   36.72    2.56
  -1   3  10   39.28    2.14
   1  -3 -10   40.28    2.89
   1   3  -9  156.52    5.28
  -1   3   9  162.80    4.58
  -1   3   9  155.65    5.65
   1  -3  -9  155.01    5.70
  -1  -3   9  150.47    5.06
  -1  -3   9  151.83    5.65
  -1   3   9  159.93    5.19
  -1   3   9  160.06    5.60
   1   3  -9  153.89    5.16
   1   3  -9  162.11    5.31
   1   3  -9  160.71    5.76
   1   3  -9  159.03    6.20
   1  -3  -9  152.93    5.54
   1   3  -8   73.82    4.00
  -1   3   8   78.59    3.33
   1   3  -8   79.32    3.43
   1  -3  -8   80.27    3.78
  -1  -3   8   74.71    2.12
   1   3  -8   72.66    3.45
  -1  -3   8   73.92    3.22
  -1   3   8   82.73    2.59
   1  -3  -8   77.92    3.70
  -1  -3   7  707.87   12.12
   1   3  -7  731.21   12.53
   1  -3  -7  755.03   13.54
  -1   3   7  735.55   11.29
   1   3  -7  714.98   14.21
   1   3  -7  738.74   13.29
  -1  -3   7  714.48   10.31
   1  -3  -7  731.28   13.32
  -1   3   7  745.75   12.62
   1  -3  -6  618.48   11.98
  -1  -3   6  634.90    9.25
   1  -3  -6  632.88   11.58
   1   3  -6  634.94   10.83
   1   3  -6  647.38   11.92
   1   3  -6  623.80   11.81
   1   3  -6  631.01   12.51
  -1   3   6  638.79   10.25
   1  -3  -6  635.41   11.90
  -1  -3   6  616.36   10.41
   1  -3  -5  352.74    7.85
  -1   3   5  358.07    6.80
  -1  -3   5  364.77    8.39
   1   3  -5  350.36    7.89
  -1  -3   5  344.79    5.87
   1  -3  -5  349.05    7.35
   1   3  -5  347.13    6.81
   1  -3  -5  343.01    7.91
  -1  -3   5  345.15    6.39
  -1  -3   4 1122.21   15.13
   1   3  -4 1113.75   17.57
  -1  -3   4 1150.28   18.07
  -1   3   4 1156.65   16.43
  -1  -3   4 1125.49   15.29
   1  -3  -4 1092.73   17.43
   1   3  -4 1156.03   15.99
   1  -3  -4 1101.08   16.38
   1  -3  -4 1105.50   17.36
   1   3  -4 1118.47   17.38
  -1  -3   3 1105.58   15.62
  -1   3   3 1155.42   15.62
   1  -3  -3 1131.96   17.33
   1  -3  -3 1149.93   16.02
  -1  -3   3 1194.81   18.04
  -1  -3   3 1120.18   14.60
   1   3  -3 1172.77   17.45
   1  -3  -3 1153.70   17.46
   1   3  -3 1166.58   17.74
   1   3  -3 1155.51   17.66
  -1   3   2  130.08    3.25
   1  -3  -2  130.14    3.04
   1   3  -2  135.10    4.05
   1  -3  -2  135.53    3.99
   1   3  -2  137.73    3.72
  -1  -3   2  134.04    3.38
   1  -3  -1  213.03    3.62
   1  -3  -1  217.62    5.07
   1   3  -1  214.49    4.74
  -1   3   1  196.65    4.40
   1   3  -1  214.73    5.25
  -1  -3   1  211.10    4.69
   1  -3   0  117.57    3.66
   1   3   0  127.03    3.42
   1   3   0  126.12    2.84
  -1   3   0  119.24    3.33
  -1   3   0  125.06    3.15
   1  -3   0  118.24    3.45
   1   3   0  127.70    3.91
  -1  -3   0  119.75    3.50
  -1  -3   0  121.97    3.70
  -1   3  -1  238.26    4.28
   1   3   1  240.74    5.05
  -1   3  -1  235.23    5.49
   1   3   1  234.12    5.54
   1  -3   1  223.37    5.39
  -1  -3  -1  225.58    5.32
   1  -3   1  225.26    4.89
   1   3   2  146.71    2.78
   1   3   2  142.96    3.75
   1  -3   2  138.43    3.41
  -1   3  -2  143.87    4.16
   1   3   2  149.86    4.16
  -1  -3  -2  143.05    4.20
   1  -3   2  144.04    3.62
   1   3   3 1130.91   14.85
   1  -3   3 1085.08   15.73
  -1  -3  -3 1065.23   16.86
  -1   3  -3 1136.72   17.20
  -1  -3  -3 1083.87   16.78
   1   3   3 1103.01   16.29
   1  -3   3 1147.22   17.06
   1   3   3 1086.43   15.94
   1  -3   3 1056.41   14.71
  -1   3  -4 1124.96   17.44
  -1  -3  -4 1087.59   17.26
  -1  -3  -4 1099.25   16.58
   1  -3   4 1117.62   17.20
   1   3   4 1105.76   16.27
  -1   3  -4 1097.51   14.20
  -1  -3  -4 1118.30   17.10
   1  -3   4 1077.95   14.31
   1   3   4 1038.00   15.29
   1  -3   4 1096.98   16.05
  -1  -3  -5  349.04    7.62
  -1   3  -5  351.05    8.04
  -1   3  -5  348.20    5.93
   1  -3   5  357.38    7.17
   1   3   5  356.56    6.86
  -1   3  -5  350.66    7.83
   1  -3   5  364.22    7.88
  -1  -3  -5  345.14    7.99
  -1   3  -5  361.93    7.42
  -1  -3  -5  350.93    7.78
  -1   3  -6  620.43   10.25
   1  -3   6  671.90   12.16
   1   3   6  657.78   11.25
  -1  -3  -6  664.59   12.17
  -1   3  -6  644.29   12.27
  -1   3  -6  644.41   12.50
  -1   3  -6  638.69   11.35
   1  -3   6  652.26   11.47
  -1  -3  -6  639.48   12.45
  -1  -3  -6  650.43   12.07
   1   3   7  798.03   13.99
   1  -3   7  790.86   13.32
  -1   3  -7  762.86   12.76
  -1   3  -7  783.43   14.32
  -1  -3  -7  788.23   13.69
   1   3   7  786.79   13.09
  -1   3  -7  777.25   13.55
  -1   3  -7  757.56   12.57
  -1  -3  -7  793.77   14.05
   1  -3   7  767.23   13.63
  -1   3  -7  736.05   12.07
  -1   3  -7  780.47   14.06
   1   3   7  791.64   13.56
   1   3   8   81.81    3.61
  -1   3  -8   79.31    3.94
  -1   3  -8   81.25    3.24
   1  -3   8   82.51    3.66
  -1   3  -8   82.31    3.78
   1  -3   8   80.57    3.72
  -1  -3  -8   87.60    3.88
  -1   3  -8   83.16    3.27
   1   3   8   80.72    3.88
   1   3   8   79.94    3.66
  -1  -3  -8   82.86    3.98
  -1   3  -8   83.13    4.09
  -1   3  -9  160.44    5.70
  -1  -3  -9  167.96    6.11
  -1   3  -9  173.45    5.29
  -1   3  -9  173.51    4.90
   1   3   9  170.99    5.68
   1  -3   9  167.20    5.71
  -1  -3  -9  179.63    5.88
   1   3   9  165.94    5.44
   1  -3   9  169.95    5.69
   1   3   9  164.95    5.96
   1   3   9  170.92    5.61
  -1   3  -9  164.63    6.13
  -1   3  -9  171.55    6.13
  -1  -3 -10   42.40    2.88
  -1   3 -10   40.16    2.89
   1   3  10   40.27    2.72
  -1   3 -10   42.55    2.68
   1   3  10   36.52    2.48
   1   3  10   42.44    3.03
   1  -3  10   38.10    2.71
   1   3  10   40.71    2.83
   1  -3  10   38.51    2.81
  -1  -3 -10   40.43    3.06
  -1   3 -10   38.32    3.04
   1  -3  10   37.79    2.56
  -1   3 -10   38.72    2.98
   1   3  11  516.33   12.00
  -1   3 -11  524.73   12.69
   1  -3  11  523.76   12.16
  -1   3 -11  512.18   12.73
  -1   3 -11  507.03   12.13
   1   3  11  526.44   12.41
   1  -3  11  512.01   11.36
   1   3  11  524.83   11.19
   1   3  11  519.94   12.85
   1  -3  11  509.11   11.52
  -1  -3 -11  536.68   11.92
  -1  -3 -11  515.21   12.78
  -1   3 -11  518.11   11.40
   1   3  12    0.32    0.84
  -1  -3 -12    1.57    0.94
   1  -3  12    1.08    0.67
   1   3  12    1.70    0.81
  -1   3 -12    0.87    0.85
   1   3  12    1.56    0.74
   1   3  12    1.11    0.76
  -1   3 -12    1.53    0.78
   1  -3  12    2.10    0.86
  -1   3 -12    2.26    1.09
  -1   3 -12    0.52    0.79
   1  -3  12    1.76    0.88
   1  -3  13  101.60    5.29
  -1  -3 -13   98.06    5.59
   1   3  13   97.18    5.05
  -1   3 -13   95.00    4.83
   1   3  13  101.59    5.65
   1  -3  13  103.04    4.78
  -1   3 -13   98.28    5.23
   1   3  13  101.28    5.24
  -1   3 -13  104.61    5.59
   1  -3  13   93.84    4.76
   1   3  13   98.76    5.44
  -1  -3 -14   25.45    2.99
   1   3  14   22.48    2.51
  -1   3 -14   20.28    2.53
   1  -3  14   22.06    2.41
   1  -3  14   23.91    2.74
   1   3  14   22.14    2.53
  -1   3 -14   20.93    2.63
   1   3  14   22.68    2.82
  -1   3 -14   20.54    2.32
   1   3  14   25.45    2.92
   1  -3  14   25.08    2.38
   1   3  15  196.84    7.84
  -1  -3 -15  199.30    8.83
  -1   3 -15  193.17    7.71
   1   3  15  193.04    8.08
   1   3  15  208.44    8.88
   1  -3  15  190.25    7.56
   1  -3  15  194.09    8.16
   1   3  15  195.92    8.46
  -1   3 -15  188.15    7.98
   1   3  16   13.95    2.33
  -1   3 -16   12.97    1.17
   1  -3  16   13.63    2.26
   1  -3  16   11.79    1.14
  -1  -3 -16   13.60    2.36
   1   3  16   13.75    2.39
   1   3  16   11.41    2.28
  -1   3 -16   13.41    1.25
   1  -3  16   10.46    1.86
  -1  -3 -16   13.79    1.21
   1   3  16   12.15    2.03
  -1   3 -16   11.82    2.05
   1  -3  16   11.34    1.10
   1   3  16   12.05    2.15
  -1   3 -16   11.22    2.01
   1  -3  17   11.76    1.12
  -1   3 -17   12.62    1.21
   1   3  17   12.52    2.34
  -1   3 -17   13.15    1.19
   1   3  17   15.43    2.72
  -1  -3 -17   12.02    2.35
  -1   3 -17   12.65    1.17
   1  -3  17   16.26    2.59
   1  -3  17   12.01    1.19
  -1  -3 -17   14.96    1.29
   1   3  17   10.85    2.24
   1   3  17   11.84    2.24
  -1   3 -17   11.69    2.14
   1   3  17   12.34    2.10
   1   3  17   10.04    1.94
  -1  -3 -18   10.97    1.16
  -1   3 -18   12.08    1.20
   1  -3  18   10.70    1.16
   1   3  18    9.15    1.97
  -1   3 -18   11.74    1.17
  -1  -3 -18   10.95    1.16
  -1  -3 -18   12.62    2.54
  -1   3 -18   11.55    1.12
   1   3  18   10.70    2.22
  -1   3 -18   12.85    2.35
   1  -3  18   12.33    2.30
   1   3  18   12.69    2.37
   1   3  18   12.12    2.37
   1  -3  18   12.77    1.22
  -1  -3 -19    2.72    1.07
  -1  -3 -19    3.00    0.75
   1   3  19    3.87    1.47
  -1   3 -19    2.18    0.60
  -1   3 -19    2.65    1.29
   1   3  19    6.39    1.93
  -1   3 -19    3.32    0.71
   1  -3  19    2.60    0.65
   1  -3  19    3.76    0.75
  -1  -3 -19    3.01    0.70
   1   3  19    3.44    1.35
  -1  -3 -19    2.81    0.67
  -1   3 -19    3.67    0.79
   1  -3  19    3.63    1.39
   1  -3  19    3.68    0.76
   1  -3  20   57.23    2.69
  -1  -3 -20   58.32    2.64
  -1  -3 -20   59.86    2.51
  -1   3 -20   58.98    2.69
   1  -3  20   57.83    2.54
   1  -3  20   58.89    2.68
  -1   3 -20   60.80    5.07
  -1   3 -20   59.50    2.58
  -1   3 -20   60.81    2.73
   1   3  20   58.40    5.28
  -1  -3 -20   61.46    2.78
   1  -3  21  403.77    7.91
   1  -3  21  401.10    8.17
   1  -3  21  395.74    8.11
   1  -3  21  418.62    8.38
  -1  -3 -21  399.46    8.15
  -1   3 -21  413.35    8.26
  -1   3 -21  402.70    7.91
   1   3  21  438.14   14.93
  -1   3 -21  414.12    8.29
  -1  -3 -21  399.92    7.72
  -1  -3 -21  409.28    8.31
   1   3  21  425.34   14.65
  -1   3 -22   13.11    1.27
   1  -3  22   14.05    1.30
   1   3  22   11.39    2.28
  -1  -3 -22   13.97    1.19
   1   3  22   14.29    2.65
   1  -3  22   13.17    1.31
   1  -3  22   12.76    1.28
  -1  -3 -22   15.06    1.39
  -1   3 -22   14.49    1.31
   1   3  23  152.94    8.37
  -1  -3 -23  155.02    4.43
  -1   3 -23  158.97    4.43
  -1  -3 -23  150.00    3.93
   1  -3  23  149.87    4.28
  -1   3 -23  153.28    4.36
   1  -3  23  151.52    4.39
   1  -3  23  150.75    4.26
  -1   3 -24    8.06    0.85
   1  -3  24    7.80    0.98
   1   3  24    8.35    0.90
   1  -3  24    6.66    0.83
   1  -3  24    8.20    0.95
  -1   3 -24    7.41    0.95
  -1  -3 -24    8.47    1.01
  -1   3 -24    7.96    0.96
   1   3  24    6.87    1.93
  -1   3 -25   39.00    1.92
  -1  -3 -25   40.55    1.95
  -1   3 -25   39.39    1.93
   1   3  25   39.87    1.75
   1  -3  25   40.20    1.89
   1  -3  25   41.45    1.99
  -1   3 -25   39.33    1.68
  -1   3 -26    2.66    0.54
  -1  -3 -26    1.29    0.47
   1  -3  26    1.28    0.46
   1   3  26    2.76    0.57
   1   3  26    1.44    0.37
   1  -3  26    2.08    0.51
   1  -3  26    1.88    0.46
   1  -3  27  148.23    3.35
   1   3  27  163.49    3.45
   1  -3  27  159.65    3.58
  -1   3 -27  155.09    3.49
   1  -3  27  165.85    3.54
   1  -3  27  142.80    3.01
  -1  -3 -27  158.10    3.55
   1  -3  28   13.77    0.78
   1  -3  28   12.57    0.73
  -1  -3 -28   13.05    0.81
   1   3  28   12.40    0.72
  -1   3 -28   13.65    0.81
   1   3  28   14.54    0.87
   1   4 -28    7.19    0.58
   1  -4 -28    5.71    0.49
  -1  -4  27   22.53    0.95
   1   4 -27   25.08    1.23
   1  -4 -27   25.79    1.21
  -1  -4  27   25.39    1.04
  -1  -4  27   23.68    1.16
  -1   4  27   26.44    1.19
  -1  -4  26    6.92    0.66
   1   4 -26    6.94    0.75
  -1  -4  26    6.15    0.64
  -1  -4  26    7.30    0.76
  -1  -4  25   13.72    1.03
   1  -4 -25   16.23    1.20
  -1  -4  25   12.16    1.04
   1   4 -25   14.94    1.17
  -1  -4  25   14.21    1.04
   1  -4 -24    3.97    0.73
   1  -4 -24    2.73    0.58
  -1  -4  24    2.84    0.57
  -1   4  24    5.35    1.89
   1   4 -24    3.46    0.62
   1   4 -24    4.25    0.72
  -1  -4  24    3.52    0.65
  -1  -4  24    3.84    0.73
  -1  -4  24    2.46    0.64
  -1   4  23    1.25    1.15
  -1  -4  23    0.37    0.47
   1  -4 -23    1.84    0.63
   1   4 -23    1.29    0.50
   1  -4 -23    1.13    0.48
  -1  -4  23    0.62    0.45
  -1  -4  23    0.43    0.43
   1   4 -23    0.91    0.53
   1   4 -23    0.47    0.44
  -1  -4  23    1.89    1.33
  -1  -4  22    0.79    0.48
  -1   4  22    1.15    0.97
   1   4 -22    1.40    0.56
  -1  -4  22    1.32    1.29
  -1  -4  22    0.46    0.47
   1  -4 -22    2.01    0.69
   1   4 -22    0.47    0.47
  -1  -4  22    0.69    0.54
   1   4 -22    0.85    0.54
   1  -4 -22    0.67    0.49
  -1  -4  21    5.49    1.79
   1   4 -21    6.24    0.95
   1  -4 -21    7.03    0.92
   1  -4 -21    5.98    0.96
  -1  -4  21    5.58    0.95
  -1  -4  21    5.50    0.92
   1   4 -21    5.56    0.89
   1   4 -21    5.84    0.90
  -1   4  21    6.21    1.91
   1   4 -20    6.52    0.91
  -1  -4  20    7.39    1.90
   1  -4 -20    7.53    1.07
  -1  -4  20    6.29    1.01
   1  -4 -20    6.35    0.99
  -1   4  20    2.40    1.11
  -1  -4  20    5.01    0.92
  -1   4  20    7.15    2.07
   1   4 -20    5.18    0.89
  -1   4  20    4.91    1.65
   1   4 -20    5.81    0.90
  -1  -4  19   85.84    3.36
  -1  -4  19   86.82    6.56
   1   4 -19   86.50    3.24
   1   4 -19   84.93    3.23
  -1  -4  19   82.83    3.30
  -1   4  19   84.84    6.06
  -1   4  19   87.12    6.40
   1  -4 -19   85.38    3.19
   1   4 -19   83.86    3.24
   1  -4 -19   87.79    3.34
   1  -4 -18   32.89    3.89
  -1   4  18   29.24    3.49
   1   4 -18   27.10    1.77
  -1   4  18   31.07    3.75
   1   4 -18   28.13    1.82
  -1  -4  18   29.85    1.92
   1   4 -18   28.61    1.83
   1  -4 -18   29.61    1.83
   1  -4 -18   28.28    1.89
  -1  -4  18   28.82    1.89
  -1   4  18   27.77    3.37
  -1  -4  17  227.93    5.70
  -1   4  17  239.31    9.89
  -1   4  17  223.62    9.68
  -1  -4  17  227.22    5.68
   1  -4 -17  234.83   10.32
   1  -4 -17  223.68    5.46
   1   4 -17  219.07    5.46
   1   4 -17  220.27    5.45
   1  -4 -17  223.03    5.63
   1   4 -17  224.57    5.51
  -1  -4  17  219.18    5.49
  -1   4  17  233.25    9.20
  -1   4  17  223.28   10.27
  -1  -4  17  229.23    9.18
  -1  -4  16   50.92    2.45
  -1  -4  16   52.76    4.17
  -1   4  16   52.84    4.78
   1  -4 -16   50.07    2.31
  -1   4  16   56.30    4.57
  -1   4  16   51.86    4.40
  -1   4  16   54.37    4.67
  -1   4  16   54.06    4.18
   1   4 -16   50.84    2.40
  -1  -4  16   54.83    2.53
   1   4 -16   48.33    2.29
   1  -4 -16   49.84    4.53
   1  -4 -16   54.92    2.50
  -1  -4  16   49.72    2.34
   1   4 -16   52.11    2.38
   1  -4 -15   12.58    1.19
  -1  -4  15   13.59    1.30
  -1   4  15   13.53    2.23
   1   4 -15   13.69    2.05
  -1   4  15   13.41    2.35
  -1   4  15   14.82    2.37
   1   4 -15   14.72    2.33
  -1  -4  15   14.71    2.13
  -1   4  15   12.59    2.10
  -1   4  15   11.50    1.88
   1  -4 -15   14.66    2.40
   1   4 -14  114.05    6.18
  -1   4  14  114.37    6.58
  -1   4  14  104.05    6.00
   1   4 -14  113.46    5.56
  -1   4  14  111.39    5.93
   1  -4 -14  113.94    6.37
  -1  -4  14  104.48    5.48
  -1   4  14  106.14    5.63
   1   4 -14  108.88    5.43
  -1   4  14  113.48    6.09
  -1   4  13   85.97    5.24
   1   4 -13   87.44    4.66
   1   4 -13   81.40    5.33
  -1   4  13   84.62    4.78
  -1   4  13   80.02    5.31
   1   4 -13   79.06    4.43
   1   4 -13   87.05    5.23
  -1  -4  13   78.90    4.48
   1  -4 -13   82.87    5.17
  -1   4  13   88.57    5.05
   1   4 -12  221.76    7.26
   1   4 -12  211.04    8.52
  -1  -4  12  205.70    7.06
   1  -4 -12  219.70    8.24
   1   4 -12  214.96    7.17
  -1   4  12  211.28    7.51
  -1   4  12  209.38    8.00
   1   4 -12  208.21    8.01
  -1   4  12  210.56    8.47
  -1   4  12  219.80    7.84
  -1   4  11    4.89    1.04
  -1   4  11    4.78    1.34
   1   4 -11    5.88    1.45
  -1   4  11    6.05    1.30
   1   4 -11    6.04    1.22
  -1  -4  11    5.50    1.22
   1   4 -11    4.94    1.28
  -1   4  11    6.35    1.34
   1  -4 -11    4.45    1.26
   1   4 -11    5.96    1.37
   1  -4 -11    6.90    1.42
   1   4 -11    5.19    1.14
  -1   4  10  777.60   14.94
   1  -4 -10  758.15   15.90
  -1  -4  10  735.03   14.10
   1   4 -10  766.39   16.11
  -1   4  10  753.03   15.76
  -1   4  10  762.72   15.33
   1   4 -10  732.38   14.94
   1  -4 -10  765.92   15.81
   1   4 -10  774.50   14.41
  -1   4  10  771.61   13.79
   1   4 -10  743.94   16.63
  -1  -4   9    1.29    0.57
  -1   4   9    2.28    0.80
   1   4  -9    0.82    0.63
   1   4  -9    0.06    0.49
   1  -4  -9    0.96    0.75
   1  -4  -9    0.97    0.72
  -1   4   9    0.76    0.43
   1   4  -9    0.61    0.76
   1   4  -8    6.99    1.39
   1  -4  -8   10.90    1.48
  -1   4   8    6.57    0.91
   1  -4  -8    7.72    1.43
   1   4  -8    4.52    1.18
  -1   4   8    8.29    1.38
  -1  -4   8    3.97    1.08
  -1  -4   8    4.36    0.80
   1   4  -8    4.46    0.82
  -1  -4   7  205.62    4.57
   1   4  -7  206.39    6.99
   1   4  -7  209.63    6.54
   1  -4  -7  210.47    6.74
   1  -4  -7  196.73    6.09
   1   4  -7  203.33    5.40
  -1  -4   7  205.70    5.15
   1   4  -7  203.90    6.53
  -1   4   7  216.55    5.32
   1  -4  -7  197.98    6.53
  -1  -4   7  200.44    6.93
  -1  -4   6   14.98    1.19
  -1  -4   6   16.00    1.81
   1   4  -6   15.38    1.69
   1   4  -6   15.37    1.27
   1   4  -6   14.30    1.81
   1  -4  -6   14.79    1.76
   1  -4  -6   12.84    1.39
  -1  -4   6   16.29    1.19
  -1   4   6   15.94    1.37
   1  -4  -6   16.17    1.71
   1  -4  -5  289.11    6.72
  -1  -4   5  296.02    6.05
   1  -4  -5  302.74    7.78
  -1  -4   5  290.65    5.48
   1   4  -5  295.31    7.83
   1   4  -5  291.46    7.97
   1  -4  -5  308.96    7.90
  -1  -4   5  293.62    8.02
  -1   4   5  302.12    6.73
   1   4  -5  294.96    6.06
   1  -4  -4   28.18    1.69
   1   4  -4   28.37    2.16
   1  -4  -4   26.26    2.02
  -1   4   4   24.64    1.02
   1   4  -4   23.89    2.06
  -1  -4   4   26.63    1.58
   1   4  -4   27.70    2.21
   1   4  -4   23.52    1.38
  -1   4   4   27.51    1.57
  -1  -4   4   24.52    1.08
  -1  -4   4   27.43    2.24
   1   4  -4   27.46    2.15
   1  -4  -4   26.89    2.11
   1   4  -3    0.75    0.33
   1   4  -3    1.07    0.60
  -1  -4   3    1.64    0.55
   1  -4  -3    0.76    0.35
   1   4  -3    1.58    0.60
   1  -4  -3    0.76    0.64
   1   4  -3    0.90    0.66
   1  -4  -3    0.70    0.51
   1   4  -3    0.31    0.49
  -1   4   3    1.01    0.39
  -1  -4   3    0.87    0.56
  -1  -4   3    1.11    0.64
  -1  -4   2   49.49    2.86
   1   4  -2   49.01    2.78
  -1  -4   2   47.26    2.47
   1   4  -2   50.06    2.48
   1  -4  -2   47.39    2.61
   1   4  -2   49.77    2.71
  -1   4   2   50.57    2.25
  -1  -4   2   46.62    2.25
   1  -4  -2   47.25    1.69
   1  -4  -2   49.29    2.63
   1   4  -2   45.61    2.75
  -1  -4   1   46.70    2.75
   1  -4  -1   48.58    2.61
  -1  -4   1   47.66    2.38
  -1  -4   1   47.35    2.50
   1   4  -1   49.63    2.81
   1   4  -1   52.90    2.74
   1   4  -1   50.45    2.78
   1  -4  -1   47.88    2.53
  -1   4   1   50.16    2.32
   1   4  -1   52.57    2.28
   1   4   0  488.41    8.63
  -1  -4   0  487.08   10.13
   1   4   0  494.11    9.77
   1   4   0  489.17   10.00
   1   4   0  484.17    8.14
  -1   4   0  487.96    9.10
  -1  -4   0  484.77    9.62
  -1   4   0  481.34    9.57
   1  -4   0  473.55    9.18
   1  -4   0  483.71    9.64
  -1  -4   0  483.52    9.33
  -1  -4  -1   56.20    2.81
  -1   4  -1   48.02    2.56
  -1   4  -1   49.38    1.89
   1   4   1   53.55    3.18
   1  -4   1   48.41    2.57
   1   4   1   55.73    2.23
   1   4   1   59.71    2.54
   1  -4   1   48.42    2.37
  -1  -4  -1   54.41    2.73
  -1  -4  -2   53.67    2.75
   1  -4   2   52.12    2.31
  -1   4  -2   50.99    2.64
  -1  -4  -2   52.98    2.79
   1   4   2   53.31    2.31
   1  -4   2   52.49    2.68
  -1   4  -2   55.47    1.69
   1   4   2   44.05    1.21
   1   4   2   51.07    2.71
   1  -4   3    0.98    0.58
   1  -4   3    0.85    0.42
  -1   4  -3    0.15    0.52
   1  -4   3    0.69    0.54
   1   4   3    0.87    0.50
   1  -4   3    1.35    0.51
  -1  -4  -3    1.02    0.79
   1   4   3    1.10    0.28
  -1  -4  -3    1.35    0.78
   1   4   3    0.23    0.50
  -1  -4  -4   23.25    1.99
  -1  -4  -4   24.62    2.01
  -1   4  -4   23.19    2.03
   1   4   4   22.46    1.62
   1   4   4   23.48    1.33
   1   4   4   23.17    1.77
   1  -4   4   25.18    1.42
   1  -4   4   22.93    1.60
   1  -4   4   25.58    1.93
   1  -4   4   24.03    1.80
   1  -4   5  316.36    6.93
   1   4   5  314.09    7.09
  -1   4  -5  321.65    7.84
   1  -4   5  311.28    5.64
  -1   4  -5  318.30    8.23
  -1  -4  -5  318.97    8.28
   1  -4   5  320.60    8.06
   1   4   5  317.65    6.46
  -1  -4  -5  324.41    7.52
   1   4   5  310.62    7.32
   1  -4   5  319.01    7.81
  -1  -4  -5  317.38    8.06
   1  -4   6   16.78    1.54
  -1   4  -6   16.86    1.78
   1   4   6   17.69    1.57
  -1   4  -6   17.92    1.03
   1  -4   6   15.44    1.74
  -1  -4  -6   17.38    1.89
  -1   4  -6   15.86    1.82
   1   4   6   16.36    1.50
   1  -4   6   14.41    0.84
   1  -4   6   16.68    1.78
  -1   4  -6   16.97    1.84
  -1   4  -6   19.29    1.82
  -1  -4  -6   19.19    1.76
  -1  -4  -6   21.19    1.96
   1   4   6   17.17    1.44
  -1  -4  -7  194.92    6.23
  -1   4  -7  194.82    5.92
  -1   4  -7  195.01    6.51
  -1   4  -7  190.75    4.47
  -1   4  -7  193.63    5.99
  -1  -4  -7  193.00    6.59
   1  -4   7  189.48    6.24
  -1   4  -7  192.82    6.56
  -1   4  -7  192.91    6.70
   1   4   7  186.54    5.33
  -1  -4  -7  196.06    6.39
   1   4   7  190.41    5.44
   1  -4   7  190.13    5.66
  -1   4  -8    4.51    1.21
   1   4   8    5.63    0.95
  -1   4  -8    5.03    1.06
  -1  -4  -8    4.16    1.00
   1   4   8    4.05    0.98
  -1   4  -8    4.51    0.72
  -1   4  -8    4.11    0.93
  -1   4  -8    3.75    1.09
   1  -4   8    4.98    1.09
  -1   4  -8    4.18    1.06
   1   4   8    5.50    1.04
   1  -4   8    5.31    1.06
   1   4   8    3.11    0.80
  -1  -4  -8    5.34    1.21
  -1  -4  -9    1.20    0.81
  -1   4  -9    0.63    0.86
   1  -4   9    0.53    0.68
   1   4   9    0.03    0.55
   1   4   9   -0.13    0.61
   1   4   9    0.98    0.53
  -1   4  -9    0.69    0.69
  -1  -4  -9    0.29    0.60
   1  -4   9    0.17    0.46
  -1   4  -9   -0.32    0.69
  -1   4  -9    0.25    0.49
  -1   4  -9    0.45    0.45
   1   4   9    0.88    0.62
  -1   4 -10  738.10   13.97
  -1   4 -10  728.26   15.95
  -1  -4 -10  798.08   15.80
  -1   4 -10  738.06   15.12
  -1  -4 -10  747.17   15.96
   1   4  10  776.24   15.29
   1   4  10  760.48   15.94
   1   4  10  753.23   14.79
   1  -4  10  740.85   15.20
  -1   4 -10  740.27   16.30
   1  -4  10  739.99   14.89
  -1   4 -10  730.24   13.46
  -1   4 -11    6.61    1.57
   1   4  11    7.31    1.36
  -1   4 -11    5.73    1.34
   1  -4  11    5.03    1.16
  -1   4 -11    5.92    1.33
   1   4  11    5.96    1.25
  -1  -4 -11    5.75    1.19
   1   4  11    5.67    1.32
  -1  -4 -11    6.62    1.51
   1   4  11    6.54    1.35
   1  -4  11    5.54    1.24
   1  -4  12  224.87    7.86
   1   4  12  220.14    7.71
  -1  -4 -12  212.31    8.32
   1   4  12  221.99    7.23
  -1   4 -12  227.74    8.68
   1   4  12  226.96    8.65
  -1  -4 -12  229.84    8.05
  -1   4 -12  220.70    7.85
   1   4  12  229.60    7.67
   1   4  12  229.30    8.38
  -1   4 -12  221.14    8.44
   1  -4  13   88.56    5.01
   1   4  13   88.82    5.54
  -1  -4 -13   94.61    5.62
  -1   4 -13   87.56    5.36
   1   4  13   96.46    5.14
   1   4  13   89.57    4.92
  -1   4 -13   84.09    5.33
  -1   4 -13   89.62    5.06
   1   4  14  107.49    6.13
   1   4  14  106.48    5.54
  -1  -4 -14  107.60    6.31
   1   4  14  109.60    6.37
   1  -4  14  104.07    5.73
   1   4  14  109.71    5.77
  -1   4 -14  106.52    5.74
  -1   4 -14  100.82    6.04
   1  -4  15   17.57    1.34
  -1   4 -15   15.30    1.31
   1  -4  15   14.74    1.26
  -1  -4 -15   15.22    2.60
  -1   4 -15   13.10    2.36
   1   4  15   13.88    2.10
   1  -4  15   15.04    2.26
   1   4  15   13.12    2.30
  -1   4 -15   13.59    2.10
  -1   4 -15   14.28    1.25
   1   4  15   14.85    2.26
  -1  -4 -15   16.20    1.26
   1   4  15   17.70    2.79
   1  -4  16   50.56    2.41
  -1   4 -16   51.92    2.40
  -1   4 -16   50.31    2.21
   1   4  16   57.82    4.33
   1  -4  16   54.34    2.46
  -1  -4 -16   56.79    2.30
  -1   4 -16   52.26    2.42
  -1  -4 -16   53.94    2.47
   1   4  16   47.89    4.10
  -1  -4 -16   55.95    2.45
   1   4  16   53.96    4.57
   1   4  16   47.78    4.54
  -1  -4 -16   57.38    4.93
   1  -4  16   55.18    2.27
   1  -4  16   51.49    2.35
  -1   4 -16   51.87    2.34
   1  -4  16   51.89    2.42
  -1   4 -16   51.96    4.27
   1  -4  16   52.43    4.36
   1  -4  17  235.65    9.70
   1  -4  17  228.19    5.67
  -1   4 -17  231.52    5.64
   1  -4  17  231.60    5.55
  -1   4 -17  225.42    5.31
   1   4  17  235.55   10.05
   1   4  17  232.82   10.55
   1   4  17  240.65    9.79
  -1  -4 -17  244.04    5.83
  -1  -4 -17  242.10   10.61
  -1   4 -17  227.78    5.41
   1  -4  17  229.93    5.57
   1   4  17  239.54   10.43
  -1   4 -17  229.10    9.47
  -1  -4 -17  234.31    5.64
   1  -4  17  231.54    5.69
   1   4  17  236.99   10.55
  -1   4 -17  235.65    5.69
   1  -4  18   27.40    1.80
   1  -4  18   25.52    3.35
  -1  -4 -18   27.88    1.81
   1   4  18   27.11    3.28
   1  -4  18   25.11    1.68
  -1  -4 -18   28.17    3.65
   1   4  18   25.17    3.42
   1   4  18   26.05    3.39
   1   4  18   24.33    3.38
  -1   4 -18   27.40    1.80
  -1   4 -18   26.70    1.72
   1  -4  18   26.08    1.79
  -1   4 -18   29.55    1.87
  -1   4 -18   25.65    3.18
  -1   4 -18   27.58    1.68
  -1  -4 -18   27.05    1.85
   1  -4  18   25.73    1.74
   1  -4  19   80.19    3.18
   1  -4  19   84.12    3.27
  -1   4 -19   83.65    3.20
  -1   4 -19   86.59    5.87
  -1   4 -19   81.96    3.21
   1  -4  19   79.62    3.12
  -1   4 -19   79.64    2.95
  -1  -4 -19   88.46    3.41
   1   4  19   87.84    6.32
   1   4  19   88.81    6.50
  -1  -4 -19   84.74    3.24
  -1   4 -20    5.46    0.82
   1   4  20    5.62    1.80
   1  -4  20    5.31    0.90
  -1  -4 -20    6.46    0.97
  -1   4 -20    5.46    0.93
   1  -4  20    5.69    0.90
  -1   4 -20    5.50    0.88
   1  -4  20    6.47    0.98
  -1  -4 -20    6.00    0.87
  -1   4 -20    7.23    1.79
  -1   4 -21    6.75    0.91
   1  -4  21    7.00    0.97
   1  -4  21    6.18    0.93
  -1   4 -21    7.69    1.09
  -1  -4 -21    7.31    1.08
   1   4  21    7.94    2.15
  -1   4 -21    6.19    0.96
   1  -4  21    5.26    0.91
  -1  -4 -22    0.91    0.50
   1  -4  22    0.11    1.07
   1  -4  22    0.85    0.58
   1  -4  22    1.07    0.56
  -1   4 -22    1.96    0.66
  -1   4 -22    0.73    0.53
   1   4  22    2.46    1.47
   1  -4  23    1.22    0.54
  -1   4 -23    1.76    0.57
   1  -4  23    0.28    0.44
   1   4  23    1.14    1.17
  -1   4 -23    1.43    0.59
  -1  -4 -23    1.18    0.52
   1   4  23    1.76    1.30
   1  -4  23    0.83    0.98
   1  -4  24    3.06    0.58
  -1  -4 -24    2.91    0.65
  -1   4 -24    2.67    0.62
  -1   4 -24    4.13    0.74
   1  -4  24    3.92    0.71
   1   4  24    3.06    1.35
   1  -4  25   12.34    1.03
  -1   4 -25   11.14    1.02
  -1   4 -25   12.23    1.05
   1   4  25   12.31    0.90
  -1  -4 -25   12.72    1.08
   1  -4  25   13.25    1.10
   1   4  26    6.83    0.70
  -1  -4 -26    5.84    0.72
  -1   4 -26    7.41    0.77
   1  -4  26    6.03    0.69
   1  -4  26    5.88    0.67
   1  -4  26    5.99    0.67
   1  -4  27   25.10    1.18
  -1  -4 -27   25.27    1.22
   1   4  27   23.81    1.05
  -1   4 -27   23.12    1.15
   1  -4  27   22.78    1.04
   1   4  28    5.35    0.51
  -1  -4 -28    5.16    0.51
  -1   4 -28    4.20    0.46
   1  -4  28    5.75    0.47
   1  -5 -27    5.77    0.57
  -1   5  27    6.29    0.52
   1   5 -27    6.22    0.59
  -1  -5  26   17.97    1.04
  -1  -5  26   19.58    1.03
   1  -5 -26   21.07    1.16
   1   5 -26   18.94    1.10
   1   5 -25    1.48    0.45
  -1  -5  25    1.64    0.49
   1  -5 -25    2.41    0.52
  -1  -5  25    1.33    0.41
   1  -5 -24   14.38    1.17
  -1  -5  24   13.65    1.07
   1   5 -24   13.02    1.09
  -1  -5  24   13.18    1.12
   1   5 -24   11.43    0.91
  -1  -5  24   12.90    0.97
   1   5 -23   57.59    2.44
  -1  -5  23   56.43    2.19
  -1   5  23   59.09    4.95
   1  -5 -23   60.67    2.49
  -1  -5  23   59.32    2.45
   1   5 -23   57.75    2.43
   1   5 -23   57.76    2.26
  -1  -5  23   60.83    2.45
  -1  -5  22  113.29    3.70
   1   5 -22  121.86    3.74
  -1   5  22  124.99    7.44
   1   5 -22  115.36    3.65
  -1  -5  22  113.03    3.61
   1  -5 -22  113.91    3.69
  -1  -5  22  107.20    3.36
   1   5 -22  113.81    3.49
   1  -5 -22  112.90    3.40
  -1  -5  22  115.19    7.26
  -1  -5  22  110.87    3.63
  -1  -5  21   76.82    3.03
  -1  -5  21   76.97    3.05
  -1   5  21   77.88    6.03
   1   5 -21   75.54    2.99
   1  -5 -21   74.02    2.79
   1   5 -21   76.47    2.92
  -1  -5  21   78.13    6.08
   1  -5 -21   76.05    3.05
  -1   5  21   72.74    5.55
  -1  -5  21   73.04    3.00
  -1  -5  21   72.02    2.81
   1   5 -21   73.63    2.93
  -1   5  20   13.41    2.46
  -1  -5  20   11.11    2.50
   1   5 -20   12.02    1.22
   1   5 -20   13.09    1.28
   1   5 -20   12.36    1.23
  -1   5  20   13.15    2.66
  -1  -5  20   13.03    1.25
   1  -5 -20   13.60    1.23
   1  -5 -20   13.00    1.29
  -1  -5  20   12.46    1.30
  -1  -5  20   13.62    1.31
   1  -5 -19   19.64    1.59
  -1   5  19   18.49    2.91
   1   5 -19   17.91    1.48
   1   5 -19   19.99    1.57
   1  -5 -19   19.43    1.48
  -1   5  19   20.19    3.20
  -1  -5  19   19.18    3.09
  -1  -5  19   19.86    1.62
   1   5 -19   20.14    1.54
  -1  -5  19   18.70    1.50
  -1  -5  19   19.19    1.57
   1  -5 -18  457.66    8.95
   1  -5 -18  460.01    8.20
  -1   5  18  450.97   15.26
  -1  -5  18  441.24    8.83
  -1  -5  18  454.10   15.60
  -1  -5  18  425.63    8.52
   1   5 -18  442.55    8.66
   1  -5 -18  442.28    8.52
   1   5 -18  440.08    8.64
   1   5 -18  450.51    8.78
  -1  -5  18  442.32    8.89
  -1   5  18  460.61   14.58
  -1  -5  17   90.62    3.48
   1   5 -17   92.10    3.33
  -1  -5  17   96.16    6.79
  -1  -5  17   91.29    3.29
  -1   5  17   89.73    6.03
  -1   5  17   97.91    6.63
   1  -5 -17   92.62    3.47
  -1  -5  17   91.03    3.42
   1  -5 -17   89.67    6.33
   1   5 -17   93.44    3.41
  -1   5  17   93.41    6.07
   1   5 -17   90.07    3.29
   1  -5 -17   92.39    3.25
   1  -5 -17   93.80    3.09
  -1   5  16   10.82    2.30
   1   5 -16   13.14    1.21
   1   5 -16   11.84    1.20
  -1   5  16   11.82    2.23
   1   5 -16   11.07    2.24
   1  -5 -16   12.80    2.45
  -1   5  16   12.06    2.49
   1  -5 -16   11.31    1.02
   1  -5 -16   12.32    1.21
   1  -5 -16   12.44    1.19
  -1   5  16   11.46    2.31
  -1   5  16    9.37    1.93
  -1  -5  16   12.73    2.51
   1  -5 -16   11.25    1.07
  -1  -5  16   11.04    1.17
  -1  -5  16   11.96    1.25
   1   5 -16   11.53    1.18
  -1  -5  15    8.01    1.92
   1   5 -15    9.00    1.94
   1  -5 -15    7.64    0.92
  -1   5  15    6.54    1.47
   1  -5 -15    8.24    0.91
   1   5 -15    7.75    0.92
  -1  -5  15    8.28    1.04
   1  -5 -15    5.80    1.62
   1   5 -15    8.63    1.07
  -1   5  15    6.23    1.74
  -1   5  15    9.15    1.91
  -1   5  15    6.80    1.68
   1  -5 -15    6.77    0.89
  -1  -5  15    8.55    1.04
   1  -5 -15    8.81    1.06
   1   5 -15    9.19    1.04
  -1   5  15    9.74    1.96
   1   5 -14    8.02    0.90
  -1   5  14    8.46    1.71
   1  -5 -14    7.87    0.98
   1  -5 -14    7.86    1.73
  -1   5  14    9.59    1.96
  -1   5  14    9.92    1.83
   1   5 -14    8.79    2.02
  -1   5  14    7.88    1.81
   1   5 -14    9.29    1.04
  -1  -5  14    9.76    1.07
  -1  -5  14    8.15    1.00
  -1  -5  14    8.58    1.92
   1   5 -13   11.36    2.20
  -1   5  13   11.96    1.91
   1   5 -13   12.43    2.21
   1  -5 -13   11.50    2.04
  -1  -5  13   13.12    2.31
  -1   5  13   10.83    1.77
  -1   5  13   12.37    2.21
  -1   5  13   13.21    2.21
  -1   5  12   18.88    2.30
  -1   5  12   25.71    3.10
   1   5 -12   20.10    2.43
   1   5 -12   17.91    2.48
   1  -5 -12   19.62    2.44
  -1  -5  12   23.94    2.96
   1   5 -12   20.76    2.68
  -1   5  12   21.16    2.38
  -1   5  12   17.85    2.32
   1   5 -11  772.00   16.67
  -1   5  11  806.17   16.69
  -1   5  11  814.34   17.58
   1   5 -11  805.46   18.06
  -1  -5  11  780.35   18.36
   1  -5 -11  795.70   17.92
   1   5 -11  786.14   18.49
   1  -5 -11  810.66   17.40
  -1   5  11  797.64   18.52
  -1   5  11  812.01   16.72
   1   5 -10  218.82    7.81
   1  -5 -10  227.57    8.41
   1  -5 -10  222.13    7.80
  -1   5  10  229.33    8.70
   1   5 -10  225.44    8.67
   1   5 -10  230.85    8.44
  -1  -5  10  229.24    8.71
  -1   5  10  228.33    7.62
  -1   5  10  241.04    7.19
  -1   5  10  242.64    7.73
   1   5  -9   77.84    4.82
   1   5  -9   76.68    4.36
  -1  -5   9   77.43    4.78
   1  -5  -9   73.36    4.12
  -1   5   9   73.02    3.90
   1  -5  -9   78.66    4.63
  -1   5   9   76.39    4.14
  -1   5   8    1.76    0.64
   1   5  -8    3.43    1.08
   1  -5  -8    4.16    1.21
   1   5  -8    2.20    0.82
   1  -5  -8    1.19    0.67
  -1  -5   8    1.72    1.07
   1   5  -8    0.69    0.71
  -1  -5   8    1.43    0.57
  -1  -5   7  148.18    6.20
   1  -5  -7  145.90    5.21
  -1   5   7  147.91    4.48
   1   5  -7  139.95    6.06
   1   5  -7  142.81    5.84
   1  -5  -7  145.55    6.00
   1  -5  -7  147.16    6.04
  -1   5   7  146.37    4.78
  -1  -5   7  135.42    4.59
   1   5  -6  618.00   13.96
  -1  -5   6  643.87   14.16
  -1  -5   6  617.20   11.81
   1  -5  -6  644.09   13.87
  -1   5   6  623.90   11.31
   1  -5  -6  640.45   12.09
  -1  -5   6  627.59   11.14
  -1   5   6  664.03   12.17
   1   5  -6  648.58   13.80
   1  -5  -6  634.95   13.81
  -1  -5   5   32.32    2.74
   1  -5  -5   29.87    2.53
  -1   5   5   29.97    1.91
   1   5  -5   27.91    2.48
  -1  -5   5   30.22    2.15
  -1  -5   5   31.43    1.99
   1   5  -5   27.10    2.49
   1  -5  -5   31.91    2.01
   1  -5  -5   31.45    2.60
   1   5  -4    1.13    0.76
  -1  -5   4    1.70    0.76
  -1   5   4    0.92    0.32
   1  -5  -4    2.13    0.58
   1   5  -4    0.69    0.71
   1  -5  -4    1.33    0.71
   1  -5  -4    1.95    0.83
   1   5  -4    1.02    0.64
  -1  -5   4    1.03    0.46
  -1  -5   4    1.47    0.93
   1   5  -4    0.98    0.60
   1  -5  -3  471.35    8.09
  -1   5   3  502.88    9.60
   1   5  -3  488.99   11.27
  -1  -5   3  485.98   10.11
   1  -5  -3  458.28   10.74
   1  -5  -3  494.16   11.02
  -1  -5   3  490.65   11.32
   1   5  -3  491.19   10.94
   1   5  -3  488.39   10.90
  -1  -5   3  494.35    9.77
   1   5  -3  490.27    7.75
   1   5  -3  482.26   11.19
   1   5  -3  457.90   10.17
  -1   5   2   66.86    3.03
   1   5  -2   59.25    3.03
   1   5  -2   65.90    3.64
  -1  -5   2   61.65    3.02
   1  -5  -2   65.92    3.40
   1  -5  -2   65.31    3.50
  -1  -5   2   63.07    3.20
   1   5  -2   63.55    3.43
  -1  -5   2   60.47    3.50
   1   5  -2   64.18    3.38
   1   5  -2   63.20    3.56
   1   5  -1  787.79   15.19
  -1  -5   1  776.17   14.31
   1  -5  -1  796.34   14.65
   1  -5  -1  755.59   14.17
   1   5  -1  800.14   14.68
  -1   5   1  781.61   14.24
   1   5  -1  772.92   13.59
   1   5  -1  783.93   15.05
  -1   5   1  774.21   13.59
  -1  -5   1  792.05   15.14
  -1  -5   1  784.94   13.92
   1   5   0   29.91    1.72
   1   5   0   30.75    2.46
   1   5   0   32.32    2.38
   1  -5   0   30.85    2.33
   1   5   0   28.76    1.75
  -1  -5   0   32.06    2.31
  -1   5   0   28.59    1.88
  -1  -5   0   30.20    2.23
   1   5   0   29.95    2.48
   1   5   0   29.59    1.98
   1  -5   0   31.36    2.22
  -1   5   0   29.01    2.17
  -1   5   0   29.09    1.78
   1   5   1  758.43   12.97
  -1   5  -1  776.43   11.82
  -1  -5  -1  766.63   14.23
  -1   5  -1  759.22   13.92
   1   5   1  763.87   12.40
  -1   5  -1  761.96   13.31
  -1  -5  -1  785.49   14.25
   1   5   1  747.64   14.53
   1  -5   1  757.87   13.57
   1  -5   1  746.63   14.00
   1   5   1  746.42   14.14
   1   5   1  745.88   12.26
   1  -5   1  734.48   13.36
  -1   5  -2   72.17    2.19
   1  -5   2   65.69    3.24
   1   5   2   69.53    3.61
   1  -5   2   66.18    3.37
  -1  -5  -2   68.87    3.53
   1   5   2   69.57    2.80
  -1   5  -2   72.06    3.48
  -1  -5  -2   71.33    3.61
   1  -5   2   67.79    3.06
   1   5   2   69.79    2.81
  -1   5  -2   69.44    3.13
   1   5   3  539.25    9.78
   1  -5   3  524.80   10.92
  -1   5  -3  537.75   10.44
  -1   5  -3  536.48   11.65
   1   5   3  516.44   11.27
   1  -5   3  501.77    9.83
   1  -5   3  538.39   11.07
  -1  -5  -3  524.42   11.54
  -1  -5  -3  540.31   11.58
  -1   5  -4    0.68    0.51
   1   5   4    0.31    0.55
   1   5   4    0.99    0.51
  -1   5  -4    1.20    0.59
  -1  -5  -4    1.20    0.72
   1  -5   4    1.14    0.54
   1  -5   4    1.30    0.70
  -1  -5  -4    0.99    0.78
   1  -5   4    1.98    0.79
  -1   5  -5   27.88    2.45
   1  -5   5   27.99    2.21
   1   5   5   26.88    1.55
  -1  -5  -5   26.98    2.44
   1   5   5   27.39    1.93
   1  -5   5   26.92    1.62
  -1  -5  -5   28.17    2.46
   1  -5   5   27.92    1.83
   1  -5   5   25.78    2.23
  -1   5  -5   27.25    2.35
   1   5   5   30.73    2.35
   1   5   6  626.06   10.96
  -1  -5  -6  622.89   13.58
   1   5   6  667.27   12.95
  -1   5  -6  625.97   13.30
   1  -5   6  625.83   11.53
   1  -5   6  620.77   12.50
   1  -5   6  620.92   13.19
  -1  -5  -6  609.25   13.74
  -1   5  -6  632.75   13.79
   1   5   6  626.35   11.87
  -1   5  -6  637.75   14.06
  -1   5  -7  139.21    5.83
   1   5   7  135.28    4.45
   1   5   7  137.70    4.87
  -1  -5  -7  135.93    5.92
   1  -5   7  137.45    4.72
  -1  -5  -7  132.76    5.68
   1  -5   7  137.16    5.04
  -1   5  -7  139.65    6.06
  -1   5  -7  140.84    5.95
  -1   5  -7  133.90    5.48
   1  -5   7  140.55    5.70
  -1   5  -7  134.60    5.36
   1   5   7  142.19    5.15
   1   5   8    2.62    0.76
   1  -5   8    1.55    0.87
  -1   5  -8    1.21    0.81
   1   5   8    1.73    0.62
  -1  -5  -8    2.06    0.87
  -1  -5  -8    2.12    0.78
  -1  -5  -8    1.62    0.87
  -1   5  -8    2.42    1.12
  -1   5  -8    1.23    0.85
  -1   5  -8    1.41    0.84
   1   5   8    2.42    0.74
  -1   5  -8    2.25    0.83
   1  -5   8    2.09    0.79
   1  -5   8    1.66    0.94
  -1   5  -9   72.12    4.60
   1   5   9   72.52    4.37
  -1  -5  -9   80.49    4.59
   1  -5   9   74.71    4.45
  -1   5  -9   68.30    3.89
  -1  -5  -9   71.08    4.22
  -1   5  -9   74.26    3.97
  -1   5  -9   72.62    4.47
   1   5   9   69.60    3.72
   1   5   9   75.48    4.24
   1  -5   9   69.61    3.68
   1   5   9   75.67    3.69
   1   5   9   73.98    3.72
   1   5   9   75.76    3.59
   1  -5   9   74.96    3.80
  -1   5 -10  209.55    7.14
  -1   5 -10  215.30    7.32
  -1   5 -10  214.10    8.22
   1   5  10  219.55    7.68
   1   5  10  215.46    6.93
  -1  -5 -10  211.04    7.86
   1  -5  10  210.03    6.97
   1  -5  10  213.87    6.75
  -1  -5 -10  223.13    8.10
  -1   5 -10  212.41    8.34
   1   5  10  224.29    8.13
   1  -5  10  210.24    7.99
   1   5  10  214.03    7.14
  -1  -5 -11  829.36   17.86
  -1   5 -11  817.33   18.58
   1   5  11  801.37   16.96
   1   5  11  818.69   17.99
   1   5  11  806.93   16.22
   1  -5  11  799.87   16.38
  -1  -5 -11  801.11   17.77
  -1   5 -11  798.19   18.19
  -1   5 -11  780.20   16.51
   1  -5  11  787.02   17.93
  -1   5 -12   18.09    2.54
   1   5  12   19.75    2.28
  -1   5 -12   19.05    2.58
   1  -5  12   19.69    2.31
  -1   5 -12   15.64    2.09
   1   5  12   18.19    2.13
   1   5  12   21.24    2.37
   1   5  12   20.73    2.62
  -1  -5 -12   20.66    2.63
  -1  -5 -12   26.07    2.86
   1   5  13   12.15    2.22
  -1   5 -13   13.19    2.05
  -1  -5 -13   11.76    2.09
   1   5  13   11.79    1.90
   1   5  13   14.18    2.05
   1  -5  13   13.02    1.89
  -1   5 -13   13.45    2.37
   1   5  13   12.92    2.12
   1   5  13   12.55    1.86
  -1   5 -13   14.02    2.30
  -1   5 -14    8.01    0.97
  -1   5 -14    9.06    2.01
  -1  -5 -14   12.05    2.22
  -1  -5 -14    7.83    0.99
  -1   5 -14    8.42    0.95
  -1   5 -14    8.34    1.99
   1  -5  14    8.95    1.72
   1   5  14    7.82    1.63
  -1  -5 -14    8.63    0.98
   1  -5  14    8.18    0.99
   1   5  14   10.33    2.22
  -1   5 -14    7.29    1.57
  -1   5 -15    7.95    0.98
   1  -5  15    8.78    1.02
  -1  -5 -15    6.88    0.94
   1  -5  15    7.89    0.89
   1  -5  15    9.61    1.10
  -1   5 -15    8.36    1.76
  -1  -5 -15   10.09    2.18
  -1   5 -15    8.13    1.03
  -1  -5 -15    7.76    0.90
  -1  -5 -15    6.87    0.95
   1   5  15    9.36    2.04
   1   5  15    4.85    1.37
   1  -5  15    7.32    0.96
  -1   5 -15    9.28    2.07
   1  -5  15    8.39    1.88
  -1   5 -15    7.64    0.97
   1   5  15    9.42    1.98
  -1   5 -15    7.28    0.93
  -1   5 -16    9.54    1.07
  -1  -5 -16   10.99    2.31
   1  -5  16   10.36    1.13
   1   5  16   10.13    1.91
  -1   5 -16   10.77    1.03
  -1   5 -16   10.72    1.10
   1   5  16   11.16    2.24
   1   5  16   10.76    2.34
  -1  -5 -16   10.60    1.06
  -1   5 -16    9.07    1.03
   1  -5  16   10.53    1.11
  -1   5 -16    9.58    1.99
  -1  -5 -16    9.95    1.12
  -1  -5 -16   10.22    1.12
   1  -5  16   10.72    1.06
   1  -5  16   11.11    1.18
   1  -5  16   10.35    2.20
  -1   5 -17   95.10    3.42
  -1   5 -17   87.57    3.01
   1   5  17   93.83    6.10
   1  -5  17   90.68    3.36
  -1   5 -17   85.19    5.57
   1  -5  17   87.47    6.28
  -1  -5 -17   91.95    6.62
  -1  -5 -17   90.75    3.32
   1   5  17   92.15    6.25
   1   5  17   88.46    6.34
   1  -5  17   90.55    3.37
   1  -5  17   87.95    3.21
  -1   5 -17   95.09    3.38
   1   5  17   93.43    6.63
  -1  -5 -17   92.89    3.43
  -1   5 -17   88.34    3.24
  -1  -5 -17   91.43    3.10
   1  -5  17   94.71    3.14
   1  -5  18  423.19    8.56
  -1   5 -18  446.10    8.68
  -1   5 -18  428.37    8.00
  -1   5 -18  431.30    8.32
   1   5  18  449.75   15.40
   1   5  18  435.90   14.38
  -1  -5 -18  432.64    8.67
   1   5  18  452.88   15.11
   1  -5  18  418.85    8.32
  -1  -5 -18  430.81    8.50
  -1  -5 -18  441.75    8.03
  -1   5 -18  433.24   13.44
  -1   5 -18  421.14    8.48
   1  -5  18  439.12   14.86
   1  -5  18  439.62    8.04
   1  -5  18  432.23    8.59
  -1  -5 -19   19.26    1.54
   1   5  19   19.76    2.98
   1   5  19   19.52    3.27
  -1  -5 -19   17.61    1.34
  -1   5 -19   17.90    2.76
  -1   5 -19   16.82    1.38
   1  -5  19   17.59    1.45
  -1   5 -19   20.22    1.41
   1  -5  19   21.27    3.20
   1  -5  19   18.86    1.56
  -1   5 -19   17.44    1.47
   1   5  19   16.83    2.85
  -1  -5 -19   17.69    1.48
  -1   5 -19   18.43    1.52
  -1   5 -20   13.67    1.19
  -1  -5 -20   15.12    1.38
   1  -5  20   14.94    2.67
   1   5  20   12.04    2.42
  -1   5 -20   14.23    1.22
  -1   5 -20   14.99    1.38
   1   5  20   14.17    2.74
   1  -5  20   13.00    1.30
  -1   5 -20   12.85    1.29
   1  -5  20   13.04    1.22
   1  -5  21   74.93    2.86
  -1   5 -21   72.86    2.64
   1  -5  21   78.53    5.98
  -1   5 -21   77.51    3.03
   1  -5  21   74.02    2.96
  -1  -5 -21   76.68    3.06
  -1   5 -21   76.74    3.02
   1   5  21   79.76    6.09
  -1   5 -22  114.82    3.68
   1   5  22  116.13    7.09
   1  -5  22  106.90    3.39
  -1  -5 -22  110.67    3.63
  -1   5 -22  113.39    3.65
   1  -5  22  115.15    7.07
   1  -5  22  112.28    3.59
  -1   5 -23   62.09    2.51
   1  -5  23   56.78    2.28
   1   5  23   59.85    5.09
  -1   5 -23   59.87    2.50
   1  -5  23   58.27    2.43
  -1  -5 -23   60.24    2.49
   1  -5  24   14.47    1.16
   1  -5  24   13.93    1.10
  -1  -5 -24   13.98    1.15
   1  -5  24   13.42    1.02
  -1   5 -24   14.76    1.18
  -1   5 -24   13.27    1.14
  -1   5 -25    1.02    0.40
   1  -5  25    1.65    0.41
  -1   5 -25    1.72    0.49
  -1  -5 -25    1.75    0.47
   1  -5  25    1.94    0.46
   1   5  26   19.28    0.93
   1  -5  26   18.93    1.10
  -1   5 -26   19.26    1.12
   1  -5  26   18.51    0.93
  -1  -5 -26   19.30    1.12
  -1  -5 -27    7.32    0.61
   1  -5  27    6.44    0.56
  -1   5 -27    7.99    0.64
   1  -6 -27    1.67    0.28
   1  -6 -26    1.52    0.36
   1   6 -26    0.66    0.27
  -1  -6  26    1.35    0.32
   1   6 -25   14.14    0.96
   1  -6 -25   15.07    1.01
   1   6 -25   13.61    0.78
  -1  -6  25   14.92    0.95
   1  -6 -24  113.48    3.17
  -1  -6  24  106.99    2.97
  -1  -6  24  113.26    3.06
   1   6 -24  105.58    2.77
   1   6 -24  113.49    3.12
   1  -6 -23    6.69    0.84
  -1  -6  23    5.71    0.76
   1   6 -23    6.46    0.77
   1   6 -23    4.68    0.71
  -1  -6  23    5.15    0.73
   1   6 -23    5.18    0.72
  -1   6  22    6.71    1.76
  -1  -6  22    6.40    0.81
  -1  -6  22    8.19    0.94
   1   6 -22    7.96    0.93
   1  -6 -22    8.69    1.02
   1   6 -22    8.82    0.93
   1   6 -22    7.28    0.86
  -1   6  21    2.23    1.06
   1  -6 -21    3.07    0.76
  -1  -6  21    2.71    0.70
   1   6 -21    3.05    0.70
   1   6 -21    2.24    0.59
  -1  -6  21    3.49    0.72
  -1  -6  21    3.29    1.35
   1   6 -21    1.96    0.58
  -1   6  20  156.96    7.94
  -1  -6  20  139.99    8.26
  -1   6  20  151.30    8.35
  -1  -6  20  150.07    4.37
   1   6 -20  151.17    4.35
   1  -6 -20  153.92    4.49
   1  -6 -20  151.49    3.96
   1   6 -20  152.76    4.34
   1   6 -20  147.60    4.27
  -1  -6  20  158.83    4.55
   1   6 -19   22.03    1.58
   1  -6 -19   21.35    1.65
  -1  -6  19   20.70    1.62
   1   6 -19   19.64    1.50
   1  -6 -19   22.79    1.48
  -1  -6  19   18.67    3.05
  -1  -6  19   20.80    1.59
  -1   6  19   19.54    2.96
   1   6 -19   22.08    1.63
   1  -6 -18   13.59    1.34
   1  -6 -18   11.94    1.13
  -1  -6  18   13.65    1.35
  -1  -6  18   13.23    1.31
  -1  -6  18   11.63    1.26
  -1   6  18   12.55    2.53
  -1  -6  18   12.51    2.56
  -1   6  18   13.58    2.41
   1   6 -18   10.72    1.07
   1   6 -18   10.73    1.14
   1  -6 -18   12.19    1.06
   1   6 -18   11.16    1.25
   1   6 -18   12.46    1.23
   1  -6 -17  185.53    5.11
  -1   6  17  174.77    9.16
  -1  -6  17  179.65    5.09
   1   6 -17  182.81    4.75
  -1   6  17  190.98    9.32
   1  -6 -17  176.53    4.45
   1   6 -17  179.48    4.82
  -1  -6  17  177.95    9.45
  -1   6  17  185.47    8.72
   1   6 -17  180.23    5.01
   1   6 -17  173.12    4.74
  -1  -6  17  177.91    5.03
   1  -6 -17  180.37    4.66
  -1  -6  17  172.64    4.92
   1  -6 -16   98.99    6.56
  -1  -6  16   94.17    6.74
   1   6 -16   90.91    3.39
   1  -6 -16   88.60    3.39
   1  -6 -16   87.80    3.02
  -1   6  16   97.98    6.21
   1  -6 -16   89.40    3.15
   1   6 -16   89.97    3.21
  -1  -6  16   93.15    3.51
  -1  -6  16   92.10    3.42
   1   6 -16   98.17    6.67
  -1  -6  16   91.49    3.44
  -1   6  16   87.24    6.14
   1   6 -16   92.33    3.27
  -1  -6  15   15.74    1.39
  -1  -6  15   16.26    1.43
  -1   6  15   14.01    2.49
   1   6 -15   18.19    1.40
  -1   6  15   18.78    2.70
   1  -6 -15   17.21    1.45
  -1  -6  15   18.05    2.98
   1   6 -15   18.74    1.50
   1  -6 -15   14.56    2.53
   1  -6 -15   17.19    1.37
  -1   6  15   17.51    2.99
   1   6 -15   15.80    2.72
   1   6 -15   16.82    1.34
  -1  -6  15   17.22    1.51
   1  -6 -15   16.03    1.27
   1  -6 -15   16.45    1.33
  -1   6  14   43.09    4.46
  -1  -6  14   50.38    4.72
  -1  -6  14   47.75    2.43
   1   6 -14   48.50    2.40
   1  -6 -14   45.53    2.31
   1   6 -14   50.35    2.25
   1  -6 -14   47.30    4.24
   1  -6 -14   47.48    2.15
  -1  -6  14   46.03    2.31
  -1  -6  14   47.10    2.35
   1  -6 -14   46.95    2.18
   1   6 -14   54.27    4.79
   1  -6 -14   48.11    2.23
  -1   6  14   49.26    4.41
   1   6 -14   48.21    2.26
   1   6 -14   43.51    4.41
  -1   6  13  181.08    8.25
   1   6 -13  169.79    4.64
   1   6 -13  168.89    4.34
   1  -6 -13  177.49    4.52
  -1   6  13  166.97    7.35
   1  -6 -13  165.90    4.31
  -1   6  13  172.49    8.71
   1   6 -13  163.04    8.47
  -1  -6  13  173.24    4.78
  -1   6  13  176.50    7.46
  -1  -6  13  169.21    4.65
  -1  -6  13  169.42    8.55
   1   6 -13  169.82    4.44
   1   6 -13  170.00    8.42
   1  -6 -13  167.63    4.61
  -1  -6  13  166.17    4.57
   1  -6 -13  166.43    7.78
  -1   6  12    0.89    0.74
   1   6 -12   -0.17    0.85
  -1   6  12    3.80    1.53
  -1  -6  12    1.69    1.13
   1  -6 -12    1.95    1.03
  -1   6  12    1.72    0.91
   1   6 -12    0.58    0.94
   1   6 -12    1.09    0.98
  -1   6  12    0.35    0.72
   1  -6 -12    0.20    1.09
   1   6 -11  217.23    9.07
  -1  -6  11  210.56    9.07
   1  -6 -11  219.52    9.10
  -1   6  11  221.44    8.64
  -1   6  11  215.23    9.23
  -1   6  11  228.41    7.96
   1   6 -11  221.22    8.53
  -1   6  11  229.97    8.41
   1  -6 -11  213.18    8.10
   1   6 -11  221.59    9.39
  -1   6  10  248.53    9.59
  -1  -6  10  240.40    9.41
   1  -6 -10  241.43    9.38
   1   6 -10  244.27    9.61
  -1   6  10  251.12    8.05
   1  -6 -10  233.67    8.13
   1   6 -10  232.90    8.69
  -1   6  10  241.58    8.51
   1  -6  -9   25.90    2.87
  -1   6   9   27.48    2.68
   1  -6  -9   23.53    2.38
  -1   6   9   28.19    3.04
   1   6  -9   25.92    2.79
  -1  -6   9   23.15    2.80
   1   6  -9   26.84    3.02
  -1   6   9   25.14    2.34
   1   6  -8   58.30    4.07
  -1   6   8   61.17    3.45
  -1  -6   8   56.56    4.21
   1   6  -8   58.40    4.14
   1   6  -8   59.90    4.31
   1  -6  -8   55.83    4.14
   1  -6  -8   56.95    3.45
   1   6  -7  498.19   13.23
  -1  -6   7  500.19   13.23
  -1  -6   7  487.60   10.58
   1  -6  -7  484.77   10.94
   1   6  -7  503.79   13.03
   1  -6  -7  506.30   13.19
  -1   6   7  537.08   11.24
   1  -6  -7  501.40   13.14
  -1   6   7  519.12   10.96
  -1   6   6  217.90    6.69
   1   6  -6  210.73    7.80
   1  -6  -6  212.78    7.88
  -1   6   6  214.96    6.14
  -1  -6   6  207.86    7.85
  -1   6   6  214.26    6.16
   1   6  -6  206.83    7.82
  -1  -6   6  204.59    6.32
   1  -6  -6  202.05    7.67
  -1  -6   5  537.44   11.13
   1  -6  -5  577.39   13.54
  -1  -6   5  551.35   13.50
   1  -6  -5  545.62   13.28
  -1  -6   5  544.98   11.62
  -1   6   5  549.67   11.12
   1   6  -5  536.20   13.22
   1   6  -5  563.60   13.51
  -1   6   4   74.50    3.54
   1   6  -4   75.67    4.43
   1   6  -4   76.67    4.38
   1   6  -4   71.75    4.34
  -1  -6   4   75.54    3.64
  -1  -6   4   74.44    3.73
   1  -6  -4   78.93    4.36
   1  -6  -4   77.59    4.38
  -1  -6   4   75.87    4.46
   1   6  -3    6.15    1.36
  -1  -6   3    5.12    1.17
   1   6  -3    4.22    1.13
   1   6  -3    5.19    1.14
   1  -6  -3    4.82    1.21
   1  -6  -3    4.63    1.11
   1   6  -3    4.66    1.06
   1   6  -3    5.55    1.22
  -1   6   3    6.07    1.11
  -1  -6   3    4.24    0.97
  -1  -6   3    4.84    1.05
  -1   6   2  600.36   12.02
  -1  -6   2  574.67   13.38
   1  -6  -2  575.41   12.86
   1   6  -2  583.86   13.11
   1   6  -2  577.68   13.53
   1   6  -2  570.61   12.08
  -1  -6   2  567.16   12.33
   1   6  -2  569.73   12.79
   1  -6  -2  591.77   13.22
   1   6  -2  594.56   13.73
  -1  -6   2  582.06   12.20
  -1   6   2  582.79   11.89
  -1   6   2  579.09   12.49
  -1   6   1   33.07    2.28
   1   6  -1   36.29    3.00
   1   6  -1   32.49    2.39
   1   6  -1   42.09    3.21
   1   6  -1   37.33    2.86
  -1  -6   1   33.88    2.59
  -1   6   1   35.03    2.61
   1  -6  -1   36.21    2.76
   1  -6  -1   31.76    2.68
  -1  -6   1   33.75    2.63
   1   6   0  340.35    8.36
   1  -6   0  343.15    9.31
  -1   6   0  344.04    8.33
   1  -6   0  333.60    8.82
   1   6   0  331.49    9.70
  -1  -6   0  340.04    9.17
  -1   6   0  346.70    7.58
   1   6   0  348.81    9.35
   1   6   0  331.99    9.58
  -1   6   0  337.25    8.87
  -1  -6   0  347.88    9.09
   1  -6   1   37.30    2.85
   1   6   1   37.22    3.06
   1   6   1   43.12    2.34
   1   6   1   40.66    2.17
  -1  -6  -1   39.37    2.93
   1   6   1   38.64    2.51
   1   6   1   39.18    3.04
   1  -6   1   39.10    2.68
   1   6   1   38.50    2.86
  -1  -6  -1   42.13    3.05
  -1   6  -1   37.76    2.49
  -1   6  -1   39.01    2.77
  -1  -6  -2  617.09   13.57
   1   6   2  620.50   13.97
  -1   6  -2  644.83   12.21
   1   6   2  634.04   10.96
   1  -6   2  604.50   12.25
   1   6   2  607.01   11.95
   1  -6   2  601.80   12.72
  -1  -6  -2  603.04   13.42
   1   6   2  614.42   13.27
  -1   6  -2  621.39   13.55
   1   6   2  604.97   13.70
   1   6   2  627.61   11.47
   1  -6   2  633.75   13.31
  -1   6  -3    4.25    1.05
  -1  -6  -3    5.09    1.27
   1  -6   3    4.15    0.94
   1   6   3    5.36    1.17
  -1   6  -3    4.45    1.17
  -1  -6  -3    4.45    1.17
   1   6   3    5.91    1.27
   1   6   3    4.88    0.85
   1  -6   3    3.53    0.93
  -1   6  -3    5.02    0.99
   1  -6   3    4.08    1.01
   1  -6   4   82.20    4.16
   1  -6   4   86.81    4.28
   1   6   4   80.91    4.36
  -1   6  -4   84.89    4.63
  -1  -6  -4   87.37    4.63
  -1  -6  -4   83.90    4.61
   1  -6   4   82.88    3.52
  -1   6  -4   84.91    4.56
   1  -6   5  527.78   12.33
  -1   6  -5  533.44   12.97
  -1  -6  -5  518.73   13.10
   1  -6   5  546.81   12.11
  -1  -6  -5  538.35   13.05
   1   6   5  540.29   12.56
  -1   6  -5  543.07   13.09
  -1   6  -5  537.18   13.30
  -1   6  -6  206.52    7.72
   1   6   6  206.57    7.14
  -1   6  -6  210.69    7.56
  -1  -6  -6  203.95    7.79
   1  -6   6  214.23    7.00
  -1   6  -6  208.78    7.93
  -1  -6  -6  215.87    7.86
  -1   6  -6  210.58    7.64
   1  -6   6  200.95    7.22
   1   6   7  513.83   12.15
  -1   6  -7  520.23   13.34
  -1  -6  -7  509.65   13.44
  -1  -6  -7  548.81   13.51
   1  -6   7  523.50   11.86
  -1   6  -7  509.34   12.88
   1  -6   7  521.47   12.78
  -1   6  -7  507.72   12.75
  -1   6  -7  515.29   13.56
   1   6   7  512.39   12.33
  -1   6  -7  518.83   13.20
  -1   6  -8   61.85    4.11
  -1  -6  -8   67.87    4.63
   1  -6   8   63.64    3.69
   1   6   8   61.94    3.81
  -1   6  -8   63.15    4.34
  -1   6  -8   58.52    4.30
  -1   6  -8   60.21    4.01
   1   6   8   60.09    3.67
   1  -6   8   62.49    4.12
  -1  -6  -8   64.94    4.35
  -1   6  -9   27.29    2.96
   1  -6   9   25.96    2.42
   1   6   9   26.73    2.50
  -1   6  -9   26.50    2.67
   1   6   9   27.55    2.75
   1   6   9   27.53    2.92
  -1   6  -9   24.81    2.92
  -1  -6  -9   28.95    2.99
   1  -6   9   23.98    2.72
  -1   6 -10  243.82    9.54
  -1   6 -10  221.77    8.09
   1   6  10  237.19    9.04
  -1   6 -10  238.28    9.26
   1  -6  10  232.39    8.83
  -1  -6 -10  245.18    9.18
   1   6  10  236.21    8.59
  -1  -6 -11  236.38    9.23
  -1   6 -11  227.46    8.23
   1  -6  11  219.20    8.88
   1   6  11  232.99    8.67
   1   6  11  236.40    9.21
  -1   6 -11  230.89    9.54
  -1   6 -11  220.57    9.19
  -1  -6 -12    1.54    0.93
   1   6  12    1.79    1.14
  -1   6 -12    0.75    0.74
  -1   6 -12    1.28    0.93
   1  -6  12    1.22    1.09
   1   6  12    2.40    0.89
   1   6  12    0.48    0.68
   1  -6  13  161.61    8.03
  -1   6 -13  175.00    8.56
  -1   6 -13  172.42    4.56
  -1  -6 -13  171.47    4.46
   1  -6  13  165.53    4.42
   1   6  13  176.70    7.58
   1  -6  13  168.68    4.41
  -1  -6 -13  163.12    4.15
   1   6  13  180.37    8.41
   1   6  13  188.18    8.88
  -1  -6 -13  161.12    4.41
  -1   6 -13  170.48    8.58
  -1   6 -13  169.93    4.48
  -1  -6 -13  161.92    4.32
   1   6  14   54.79    4.88
  -1   6 -14   54.23    4.88
   1   6  14   58.31    4.86
   1  -6  14   51.32    2.36
   1  -6  14   52.09    2.32
  -1  -6 -14   46.24    2.31
  -1  -6 -14   51.86    2.34
  -1   6 -14   53.27    4.84
  -1  -6 -14   49.95    2.17
  -1   6 -14   51.10    2.36
  -1   6 -14   50.73    2.36
   1  -6  14   53.28    4.68
  -1  -6 -14   51.77    2.34
   1  -6  15   17.01    2.74
  -1   6 -15   17.43    1.42
   1  -6  15   18.97    1.44
   1   6  15   14.18    2.46
  -1  -6 -15   19.11    1.43
   1  -6  15   16.20    1.34
  -1   6 -15   20.79    3.07
  -1   6 -15   18.20    1.47
  -1  -6 -15   17.78    1.40
  -1  -6 -15   18.19    1.30
   1   6  15   13.53    2.48
  -1  -6 -15   17.42    1.43
   1  -6  15   18.58    1.43
  -1   6 -15   18.94    1.52
   1  -6  16   98.22    6.65
   1   6  16   98.29    6.45
   1  -6  16   94.92    3.29
  -1   6 -16   98.27    3.44
  -1  -6 -16   95.92    3.46
  -1   6 -16  103.92    3.56
  -1   6 -16  102.40    6.88
   1  -6  16   94.94    3.24
   1  -6  16   95.02    3.39
   1   6  16   97.30    6.81
  -1   6 -16   96.01    3.46
  -1  -6 -16   91.00    3.37
  -1  -6 -16  101.05    3.34
   1   6  17  196.30    9.92
  -1   6 -17  181.98    4.92
   1  -6  17  176.53    4.71
  -1  -6 -17  178.24    4.97
  -1   6 -17  185.49    5.01
   1   6  17  183.50    9.07
   1  -6  17  177.30    4.89
   1  -6  17  185.48    9.27
   1   6  17  195.44    9.58
   1  -6  17  178.74    4.65
  -1   6 -17  185.64    5.03
  -1  -6 -17  184.70    4.72
   1   6  18   11.15    2.27
   1  -6  18   11.54    1.14
   1  -6  18   11.39    1.21
   1   6  18   14.42    2.60
  -1  -6 -18   13.53    1.20
  -1   6 -18   11.51    1.17
  -1  -6 -18   12.52    1.30
  -1   6 -18   10.66    1.16
  -1   6 -18   13.53    1.28
   1  -6  18   12.81    2.51
   1   6  18   11.09    2.67
   1  -6  18   11.87    1.12
  -1   6 -19   20.33    1.50
  -1   6 -19   20.38    1.55
  -1  -6 -19   19.46    1.40
   1   6  19   23.06    3.41
  -1   6 -19   20.24    1.54
   1  -6  19   19.62    1.52
   1   6  19   16.79    2.89
   1  -6  19   20.67    3.07
   1  -6  19   20.85    1.40
  -1  -6 -19   21.66    1.65
   1  -6  19   19.03    1.44
   1   6  20  161.52    8.17
   1  -6  20  143.11    8.03
  -1   6 -20  149.40    4.13
  -1   6 -20  153.73    4.42
  -1  -6 -20  153.63    4.43
  -1  -6 -20  155.50    4.00
   1  -6  20  147.28    4.10
   1  -6  20  144.35    4.23
  -1   6 -20  150.34    4.37
   1   6  20  157.37    8.53
  -1   6 -21    3.01    0.67
  -1  -6 -21    2.57    0.64
   1   6  21    3.05    1.12
   1  -6  21    2.90    0.66
  -1   6 -21    2.50    0.59
   1  -6  21    2.81    0.70
  -1  -6 -21    3.12    0.61
   1  -6  21    2.69    1.22
   1  -6  21    3.08    0.65
  -1   6 -21    2.80    0.69
  -1   6 -22    7.42    0.92
  -1  -6 -22    7.26    0.96
  -1   6 -22    7.91    0.92
   1  -6  22    6.47    0.78
   1  -6  22    6.31    0.87
  -1   6 -22    7.22    0.80
  -1   6 -23    6.20    0.80
  -1   6 -23    6.59    0.82
  -1  -6 -23    6.46    0.85
   1  -6  23    6.37    0.81
   1  -6  23    6.22    0.71
   1  -6  24  111.27    3.13
   1  -6  24  101.88    2.62
  -1  -6 -24  108.37    3.06
  -1   6 -24  107.31    3.06
  -1   6 -24  110.37    3.10
   1  -6  25   14.45    0.98
  -1   6 -25   13.60    0.96
  -1   6 -25   13.43    0.96
  -1  -6 -25   13.87    0.96
  -1   6 -26    0.74    0.33
  -1  -6 -26    1.39    0.37
   1  -6  26    1.36    0.36
   1  -7 -26   10.06    0.61
  -1  -7  25    3.27    0.39
   1   7 -25    3.88    0.47
   1  -7 -25    3.68    0.50
  -1  -7  25    4.02    0.46
   1   7 -24    1.57    0.44
  -1  -7  24    1.50    0.40
   1  -7 -24    1.49    0.41
   1   7 -24    1.50    0.35
   1   7 -23   37.64    1.66
   1   7 -23   31.95    1.49
   1  -7 -23   36.13    1.69
  -1  -7  23   34.83    1.63
   1   7 -22    3.63    0.62
   1   7 -22    3.40    0.62
  -1  -7  22    2.78    0.59
   1  -7 -22    3.17    0.61
   1   7 -22    2.87    0.57
   1   7 -21    8.42    0.97
   1   7 -21    7.18    0.86
  -1   7  21    8.53    1.90
  -1  -7  21    8.96    1.00
   1  -7 -21    7.91    0.81
   1  -7 -21    8.70    0.98
   1   7 -21    7.71    0.91
  -1   7  20    4.05    1.52
  -1  -7  20    5.60    0.88
  -1  -7  20    6.82    1.81
  -1  -7  20    6.49    0.90
   1   7 -20    6.30    0.89
   1  -7 -20    4.78    0.80
   1   7 -20    6.42    0.86
   1  -7 -20    6.72    0.83
   1   7 -20    7.10    0.92
  -1   7  19  193.46    9.18
  -1  -7  19  174.29    9.08
   1   7 -19  184.30    4.69
   1  -7 -19  182.24    4.30
   1  -7 -19  190.41    5.03
  -1  -7  19  193.86    5.11
   1   7 -19  180.47    4.74
   1   7 -19  182.31    4.54
  -1  -7  19  181.31    4.79
   1  -7 -19  182.65    4.56
   1   7 -19  187.72    4.95
   1   7 -18   15.84    1.31
   1  -7 -18   16.29    1.45
  -1  -7  18   15.22    1.43
   1   7 -18   15.46    1.31
   1  -7 -18   15.03    1.20
   1  -7 -18   16.10    1.32
   1   7 -18   15.57    1.38
  -1  -7  18   17.09    1.46
  -1  -7  18   12.10    2.47
   1   7 -18   16.56    1.31
   1  -7 -17  160.26    4.24
   1   7 -17  162.57    4.44
   1   7 -17  163.52    4.53
  -1  -7  17  156.80    8.80
  -1   7  17  170.61    9.06
   1  -7 -17  165.72    4.76
  -1  -7  17  152.64    4.52
   1   7 -17  160.21    4.70
   1  -7 -17  163.03    4.43
  -1   7  17  165.32    8.71
  -1  -7  17  164.58    4.82
   1  -7 -16   84.79    3.29
  -1  -7  16   80.57    3.16
   1   7 -16   80.87    3.02
  -1   7  16   85.19    6.13
  -1  -7  16   72.48    5.93
  -1  -7  16   84.33    3.37
   1   7 -16   81.15    3.23
   1  -7 -16   79.42    3.01
   1   7 -16   81.08    3.05
   1  -7 -16   80.11    2.90
  -1   7  16   87.91    5.78
  -1   7  16   79.10    6.10
  -1  -7  15   18.28    1.51
  -1   7  15   20.17    2.92
  -1   7  15   19.80    2.67
  -1  -7  15   18.35    1.58
   1  -7 -15   17.47    1.35
   1   7 -15   16.56    1.34
   1  -7 -15   17.31    1.53
  -1   7  15   17.53    2.87
   1  -7 -15   18.30    1.45
  -1  -7  15   15.72    2.85
   1   7 -15   17.77    1.39
   1   7 -15   17.81    1.47
   1   7 -14  135.64    3.99
   1   7 -14  127.61    7.89
  -1  -7  14  132.74    3.88
  -1  -7  14  131.07    7.87
   1  -7 -14  136.36    4.21
   1   7 -14  134.12    4.22
  -1   7  14  143.20    7.73
   1  -7 -14  133.63    3.91
   1   7 -14  133.49    3.87
   1  -7 -14  132.94    4.04
  -1  -7  14  136.97    4.35
   1   7 -14  136.41    8.07
  -1  -7  14  132.97    4.12
   1   7 -13    5.11    0.77
   1   7 -13    6.07    1.76
   1  -7 -13    5.41    0.87
   1   7 -13    5.19    0.91
  -1   7  13    4.16    1.50
   1   7 -13    6.65    1.86
   1   7 -13    5.83    0.84
  -1  -7  13    4.96    0.77
   1  -7 -13    7.26    0.99
  -1  -7  13    7.72    1.97
  -1   7  13    6.10    1.65
  -1  -7  13    5.74    0.92
  -1  -7  13    5.12    0.88
   1  -7 -13    5.59    0.86
   1   7 -12   10.93    2.37
  -1  -7  12    7.59    1.02
   1  -7 -12    9.42    1.11
   1   7 -12   10.76    1.95
  -1   7  12    9.92    1.88
   1   7 -12    8.96    0.99
   1  -7 -12    8.62    1.07
  -1   7  12    9.34    2.14
   1   7 -12   10.47    2.28
  -1  -7  12    8.91    1.09
  -1  -7  12    5.41    1.65
   1  -7 -12    9.60    1.00
   1   7 -12    8.97    0.94
  -1  -7  12    8.33    0.93
  -1   7  11  126.25    6.67
   1   7 -11  127.63    7.32
   1  -7 -11  129.81    3.76
  -1  -7  11  127.44    7.33
   1  -7 -11  119.11    3.75
   1   7 -11  122.02    6.70
  -1   7  11  131.48    6.72
  -1   7  11  117.76    7.10
  -1  -7  11  124.37    3.81
   1  -7 -11  133.02    3.89
   1   7 -11  115.38    7.03
   1   7 -11  124.03    3.60
  -1  -7  11  130.17    4.05
   1  -7 -11  119.04    7.11
  -1  -7  11  122.86    3.71
   1   7 -10    7.30    1.80
   1   7 -10    8.23    1.95
   1  -7 -10    5.60    1.70
   1   7 -10    6.46    1.65
  -1  -7  10    6.07    0.89
  -1   7  10    6.63    1.37
   1  -7 -10    7.22    0.90
   1  -7 -10    6.90    0.90
  -1  -7  10    6.06    1.64
  -1   7  10    5.25    1.64
  -1   7   9   64.44    4.89
   1  -7  -9   69.85    5.18
   1   7  -9   66.81    5.08
   1   7  -9   58.52    4.58
  -1  -7   9   65.23    4.92
   1   7  -8    1.44    0.82
   1  -7  -8    1.30    1.03
  -1   7   8    1.99    0.87
  -1  -7   8    2.78    1.09
   1   7  -8    1.90    1.11
   1   7  -8    2.80    1.19
  -1  -7   7   34.58    3.41
  -1   7   7   37.16    3.44
   1  -7  -7   36.90    3.62
   1   7  -7   30.72    3.27
   1   7  -7   36.02    3.54
   1  -7  -6   82.88    5.23
  -1  -7   6   82.00    5.21
  -1   7   6   82.50    4.38
   1   7  -6   81.76    5.18
   1   7  -6   76.29    5.04
   1  -7  -6   85.50    5.23
  -1   7   6   83.52    4.96
  -1  -7   5   98.64    4.68
   1   7  -5   93.37    5.39
   1  -7  -5   99.68    5.63
  -1   7   5   99.45    4.89
   1   7  -5   97.21    5.63
  -1   7   5   90.51    5.02
  -1  -7   5   95.92    5.52
   1  -7  -5   99.26    5.59
  -1   7   4   61.98    3.93
   1   7  -4   60.18    4.37
   1   7  -4   58.43    4.18
  -1   7   4   63.17    3.58
   1  -7  -4   64.53    4.35
  -1   7   4   59.61    3.88
   1   7  -4   59.21    4.33
   1  -7  -4   62.20    4.34
  -1  -7   4   59.84    3.64
  -1  -7   4   62.53    3.75
  -1  -7   4   61.40    4.31
   1   7  -3  128.23    6.06
  -1  -7   3  129.08    6.28
  -1   7   3  134.88    5.59
   1  -7  -3  141.81    6.50
   1  -7  -3  128.68    6.08
   1   7  -3  125.54    5.59
  -1  -7   3  131.59    5.58
   1   7  -3  130.79    6.46
  -1   7   3  131.57    5.75
  -1  -7   3  132.97    5.67
   1   7  -3  133.02    6.49
   1   7  -2  324.36   10.00
  -1  -7   2  309.50    9.22
   1   7  -2  322.39    9.76
  -1   7   2  341.28    8.84
   1   7  -2  321.13    9.11
   1   7  -2  323.27   10.44
  -1  -7   2  327.01    9.50
  -1   7   2  313.47    9.20
   1  -7  -2  333.70   10.21
   1  -7  -2  303.79    9.61
   1   7  -2  317.98   10.35
   1   7  -1   11.37    1.78
  -1   7   1   10.31    1.59
   1   7  -1   12.24    1.69
   1   7  -1   11.76    1.93
   1   7  -1   12.82    1.88
  -1  -7   1   11.79    1.76
   1   7  -1    9.91    1.83
  -1  -7   1    8.79    1.48
   1  -7  -1   10.80    1.79
   1  -7  -1   10.20    1.63
   1   7   0   19.47    2.46
   1   7   0   21.90    2.61
   1  -7   0   22.03    2.39
  -1  -7   0   22.61    2.39
   1   7   0   20.42    2.10
  -1   7   0   17.10    2.04
   1   7   0   21.18    2.37
   1  -7   0   22.94    2.48
  -1  -7   0   21.43    2.35
   1   7   1   11.79    1.90
  -1   7  -1   14.35    2.08
   1   7   1   11.51    1.81
   1   7   1   12.24    1.93
  -1   7  -1   11.22    1.79
  -1  -7  -1   12.30    1.83
   1  -7   1   12.47    1.78
  -1  -7  -1   12.83    1.88
   1  -7   1   11.85    1.80
   1   7   1   13.54    1.71
  -1  -7  -2  318.12    9.88
   1   7   2  304.45   10.05
   1   7   2  311.71    9.48
  -1  -7  -2  323.80    9.90
  -1   7  -2  312.11   10.11
  -1   7  -2  310.03    9.65
   1  -7   2  340.94    9.90
   1  -7   2  300.93    8.64
   1   7   2  303.79    9.97
   1  -7   3  117.07    4.99
  -1  -7  -3  144.74    6.46
   1   7   3  126.52    5.81
   1  -7   3  131.65    5.89
   1   7   3  125.58    6.18
  -1  -7  -3  131.58    6.21
  -1   7  -3  130.06    6.07
  -1   7  -3  129.04    6.31
   1   7   3  121.83    6.03
   1  -7   4   54.81    3.72
  -1   7  -4   54.04    4.07
   1  -7   4   62.84    4.01
  -1   7  -4   56.82    4.06
  -1  -7  -4   58.62    4.23
   1   7   4   54.08    3.95
   1   7   4   56.07    4.07
   1   7   4   57.32    3.82
  -1  -7  -4   56.28    4.04
   1   7   5   98.77    5.44
   1   7   5   97.14    5.33
  -1  -7  -5   98.60    5.63
  -1  -7  -5  101.97    5.62
   1  -7   5  103.39    5.16
   1   7   5  101.81    5.15
   1  -7   5   98.66    5.15
  -1   7  -5  102.39    5.74
  -1   7  -5  101.46    5.61
  -1   7  -5   94.19    5.51
  -1   7  -5   99.13    5.49
   1  -7   6   67.28    4.34
   1   7   6   70.51    4.30
   1  -7   6   74.26    4.33
  -1   7  -6   73.82    4.89
  -1  -7  -6   62.27    4.61
  -1  -7  -6   70.25    4.72
  -1   7  -6   70.19    4.83
  -1   7  -6   72.97    4.80
   1   7   6   68.00    4.41
  -1   7  -6   71.22    4.71
   1   7   6   72.74    4.62
   1   7   7   37.21    3.28
  -1   7  -7   37.75    3.53
   1   7   7   35.62    3.05
  -1  -7  -7   40.88    3.67
  -1   7  -7   35.91    3.45
   1  -7   7   36.32    3.29
  -1   7  -7   37.64    3.65
   1  -7   7   40.98    3.20
  -1   7  -7   38.23    3.48
   1   7   7   36.13    3.20
  -1  -7  -7   39.43    3.74
  -1   7  -8    3.23    1.36
  -1   7  -8    2.56    1.05
   1   7   8    1.94    1.00
  -1   7  -8    0.97    1.02
   1  -7   8    0.96    0.61
  -1  -7  -8    1.28    1.00
   1   7   8    3.04    1.06
  -1  -7  -8    2.38    1.09
  -1   7  -8    2.04    0.94
   1  -7   9   64.30    4.59
  -1  -7  -9   70.22    5.07
   1   7   9   70.69    4.44
   1   7   9   71.76    5.05
  -1   7  -9   71.10    5.20
  -1   7  -9   71.78    4.83
  -1   7  -9   65.45    4.90
  -1  -7 -10    7.69    0.90
   1  -7  10    6.31    0.90
  -1   7 -10    8.43    1.98
  -1   7 -10    6.50    1.57
   1   7  10    7.62    1.73
   1  -7  10    6.35    1.49
   1   7  10    6.45    1.45
   1  -7  10    7.03    0.93
  -1   7 -10    6.36    1.74
  -1  -7 -10    6.98    1.63
   1  -7  11  125.11    6.84
  -1   7 -11  125.02    3.67
   1   7  11  129.74    6.79
  -1   7 -11  123.11    6.45
  -1   7 -11  132.38    7.64
  -1  -7 -11  126.97    3.71
   1  -7  11  128.01    4.03
  -1  -7 -11  134.56    7.31
  -1   7 -11  135.77    3.91
  -1  -7 -11  118.76    3.61
  -1  -7 -11  133.99    3.91
  -1   7 -11  137.01    7.52
   1   7  11  136.42    7.32
   1  -7  11  128.13    3.84
  -1   7 -12    7.66    2.00
   1  -7  12    7.78    1.06
   1  -7  12    6.81    1.65
  -1   7 -12    7.15    1.92
  -1  -7 -12    8.24    0.97
   1   7  12    8.40    1.69
   1  -7  12    8.21    0.99
  -1  -7 -12    9.28    1.06
   1   7  12    8.33    1.84
  -1   7 -12    8.67    0.96
  -1  -7 -12    8.33    0.93
   1   7  12    8.25    1.90
  -1   7 -12    9.76    1.07
  -1  -7 -13    7.09    0.93
   1   7  13    3.91    1.21
  -1   7 -13    5.82    0.79
  -1   7 -13    6.60    0.91
   1  -7  13    4.24    0.72
   1  -7  13    6.50    1.67
  -1  -7 -13    6.40    0.89
   1   7  13    5.49    1.43
  -1   7 -13    5.76    1.75
  -1  -7 -13    5.22    0.88
  -1   7 -13    5.50    1.91
   1  -7  13    6.68    1.03
  -1   7 -14  131.16    7.92
  -1  -7 -14  124.29    3.89
   1  -7  14  128.76    7.36
   1  -7  14  134.13    4.28
  -1  -7 -14  130.18    3.98
  -1   7 -14  134.22    7.95
  -1  -7 -14  123.99    3.70
   1   7  14  133.21    7.91
  -1   7 -14  132.83    4.07
  -1   7 -14  125.58    3.90
   1   7  14  135.16    7.69
   1  -7  14  130.97    3.97
   1   7  15   17.60    2.98
   1  -7  15   14.16    2.52
  -1  -7 -15   15.43    1.33
   1  -7  15   15.23    1.34
   1  -7  15   15.86    1.44
  -1   7 -15   18.21    3.00
  -1   7 -15   17.57    1.45
  -1  -7 -15   14.98    1.32
  -1   7 -15   15.94    1.43
  -1  -7 -15   15.55    1.25
  -1   7 -15   15.43    1.38
   1   7  15   18.70    2.88
  -1   7 -16   85.86    6.45
  -1   7 -16   83.84    3.19
  -1   7 -16   80.46    3.18
   1   7  16   80.02    6.27
  -1   7 -16   81.02    3.11
  -1  -7 -16   82.01    3.06
   1   7  16   89.39    6.25
  -1  -7 -16   80.04    2.81
   1  -7  16   82.64    3.34
   1  -7  16   80.36    5.93
  -1  -7 -16   80.07    3.11
   1  -7  16   81.29    3.01
   1   7  17  185.71    9.65
  -1   7 -17  160.89    4.62
   1  -7  17  166.86    4.87
  -1   7 -17  160.36    4.56
   1   7  17  169.99    8.88
  -1  -7 -17  157.91    4.06
  -1  -7 -17  164.68    4.46
   1   7  17  178.00    8.76
  -1   7 -17  169.38    4.70
   1  -7  17  163.40    8.55
   1  -7  17  160.94    4.37
  -1  -7 -17  146.97    4.43
  -1  -7 -18   17.03    1.43
   1   7  18   17.82    2.98
  -1  -7 -18   18.29    1.43
   1   7  18   16.11    2.75
  -1   7 -18   17.65    1.44
   1  -7  18   16.93    2.75
   1  -7  18   17.29    1.29
  -1   7 -18   16.04    1.38
   1  -7  18   17.51    1.31
  -1   7 -18   16.90    1.39
   1  -7  18   16.02    1.45
   1  -7  19  181.20    8.87
   1  -7  19  192.95    5.15
  -1   7 -19  189.51    4.89
   1   7  19  199.53    9.08
   1  -7  19  180.15    4.47
  -1  -7 -19  187.18    4.91
  -1  -7 -19  192.39    4.67
  -1   7 -19  193.90    5.00
  -1   7 -19  184.65    4.78
   1  -7  19  185.05    4.51
   1   7  19  203.40    9.52
   1  -7  20    4.84    0.82
  -1   7 -20    5.10    0.78
   1  -7  20    4.68    1.29
  -1  -7 -20    5.58    0.83
  -1  -7 -20    5.66    0.78
   1  -7  20    5.80    0.72
   1  -7  20    4.47    0.70
  -1   7 -20    4.45    0.76
  -1   7 -20    5.86    0.87
  -1   7 -21    9.24    0.98
   1  -7  21    9.46    1.02
  -1  -7 -21    9.03    0.98
  -1   7 -21    8.15    0.84
  -1  -7 -21    8.90    0.88
  -1   7 -21    9.33    0.99
  -1  -7 -22    3.03    0.63
  -1   7 -22    2.52    0.47
   1  -7  22    2.33    0.56
  -1   7 -22    2.17    0.55
  -1  -7 -22    2.64    0.48
  -1   7 -22    3.47    0.63
   1  -7  23   36.66    1.72
  -1   7 -23   35.09    1.66
  -1   7 -23   35.86    1.65
  -1  -7 -23   34.96    1.62
  -1  -7 -24    2.09    0.45
  -1   7 -24    2.43    0.48
   1  -7  24    1.50    0.41
  -1   7 -24    2.17    0.43
  -1  -7 -25    5.27    0.54
  -1   7 -25    5.07    0.54
   1  -7  25    5.05    0.55
  -1   7 -26    9.85    0.60
   1  -8 -24    0.93    0.32
   1   8 -24    0.60    0.24
   1   8 -23    2.84    0.44
   1  -8 -23    3.15    0.51
  -1  -8  23    2.31    0.38
  -1  -8  23    2.47    0.44
   1   8 -23    2.84    0.47
   1   8 -22   23.69    1.26
   1  -8 -22   25.50    1.37
  -1  -8  22   23.66    1.19
   1   8 -22   22.97    1.27
  -1  -8  22   24.75    1.36
  -1  -8  21   87.18    2.85
   1  -8 -21   87.14    2.52
   1   8 -21   83.36    2.54
   1   8 -21   84.21    2.73
   1  -8 -21   84.48    2.76
   1   8 -21   86.52    2.66
   1   8 -20   56.70    2.33
   1   8 -20   54.99    2.06
  -1  -8  20   55.89    2.38
   1   8 -20   58.86    2.26
   1  -8 -20   54.62    2.15
   1  -8 -20   55.34    1.94
   1  -8 -20   56.46    2.33
   1   8 -20   54.32    2.13
   1  -8 -19   11.40    1.06
   1   8 -19    9.41    1.03
  -1   8  19   10.38    1.92
  -1  -8  19   10.11    1.08
   1  -8 -19   10.11    0.93
   1   8 -19    9.19    0.94
   1   8 -19    9.72    0.97
   1  -8 -19    9.31    1.01
   1   8 -19    9.81    0.99
   1   8 -18   40.74    1.97
   1   8 -18   43.79    2.23
  -1  -8  18   41.31    4.36
   1  -8 -18   41.32    2.03
   1   8 -18   43.05    2.08
   1  -8 -18   43.33    1.94
  -1  -8  18   41.30    2.21
   1  -8 -18   42.19    2.17
   1   8 -18   43.41    2.10
   1  -8 -17    3.14    0.72
   1   8 -17    4.02    0.73
   1  -8 -17    2.79    0.66
  -1  -8  17    2.57    0.74
   1   8 -17    2.51    0.67
   1   8 -17    2.29    0.58
   1  -8 -17    3.74    0.74
   1   8 -17    2.98    0.69
  -1  -8  17    3.50    1.62
   1   8 -16   72.11    2.79
  -1  -8  16   71.70    5.81
   1  -8 -16   70.61    2.71
   1   8 -16   73.75    3.04
   1  -8 -16   71.32    2.94
  -1  -8  16   70.82    2.66
   1   8 -16   71.51    2.71
  -1  -8  16   69.85    3.04
   1  -8 -16   71.62    2.85
   1   8 -15   42.57    2.15
   1   8 -15   42.28    2.06
  -1  -8  15   41.71    2.35
  -1  -8  15   42.13    2.08
   1  -8 -15   44.10    2.17
  -1  -8  15   40.03    4.35
   1  -8 -15   44.14    2.31
   1  -8 -15   40.56    2.17
   1   8 -15   45.84    2.39
  -1   8  15   44.17    4.42
  -1   8  14   88.62    6.24
   1   8 -14   89.13    3.01
  -1  -8  14   86.00    6.43
   1  -8 -14   86.57    3.29
   1   8 -14   87.94    6.63
  -1  -8  14   84.92    3.09
  -1  -8  14   82.95    3.36
   1   8 -14   85.29    3.06
   1  -8 -14   85.22    3.21
   1   8 -14   87.13    3.37
   1  -8 -14   86.30    3.12
   1  -8 -13    6.51    1.00
  -1  -8  13    6.14    0.93
  -1  -8  13    6.90    0.93
   1   8 -13    6.65    2.07
   1   8 -13    7.12    1.80
  -1   8  13    6.27    1.79
   1  -8 -13    7.33    0.96
   1   8 -13    7.30    1.04
   1  -8 -13    6.83    0.96
   1   8 -13    6.99    0.91
  -1  -8  13    5.21    1.69
   1   8 -12   16.67    2.94
  -1  -8  12   14.70    1.43
   1   8 -12   15.77    2.63
  -1  -8  12   13.67    1.25
   1   8 -12   14.14    1.23
   1   8 -12   13.74    2.62
   1  -8 -12   13.93    1.32
   1  -8 -12   13.85    1.27
   1  -8 -12   14.62    1.32
  -1  -8  12   11.83    2.46
  -1   8  12   14.40    2.23
  -1   8  11   32.34    3.82
  -1  -8  11   30.01    3.64
   1   8 -11   28.68    1.69
   1   8 -11   31.75    3.69
  -1  -8  11   27.73    1.91
   1  -8 -11   29.68    1.81
  -1   8  11   33.29    3.49
   1   8 -11   26.93    3.50
   1  -8 -11   29.18    3.71
  -1  -8  11   26.69    1.73
   1  -8 -11   29.18    1.83
   1   8 -11   27.97    3.64
   1  -8 -11   27.62    1.75
  -1  -8  10    5.27    0.93
  -1  -8  10    2.40    1.12
   1   8 -10    4.56    1.45
  -1   8  10    4.50    1.59
   1  -8 -10    4.60    0.83
   1  -8 -10    4.98    0.81
   1   8 -10    5.14    0.76
   1   8 -10    4.56    1.71
   1  -8 -10    4.92    0.79
  -1   8  10    4.26    1.45
   1  -8 -10    3.15    1.52
  -1  -8  10    4.82    0.84
   1   8 -10    5.03    1.66
  -1   8   9   99.03    6.05
   1  -8  -9   94.04    3.25
   1  -8  -9   97.86    3.33
   1  -8  -9   89.65    3.17
   1   8  -9   94.10    6.35
  -1  -8   9   95.73    3.31
  -1   8   9   91.95    5.78
  -1  -8   9   94.64    3.47
   1  -8  -9   96.19    6.51
  -1   8   9   96.29    6.35
   1   8  -9   98.46    6.29
  -1  -8   9   96.70    3.10
  -1  -8   9   97.76    6.40
   1   8  -8   24.36    3.23
  -1  -8   8   23.02    3.15
  -1  -8   8   25.77    1.59
   1  -8  -8   24.72    1.63
   1  -8  -8   23.08    1.57
  -1   8   8   18.58    2.71
  -1  -8   8   25.00    1.72
   1  -8  -8   23.91    1.56
  -1  -8   8   22.04    1.53
   1   8  -8   23.80    3.04
  -1   8   8   20.41    2.72
   1  -8  -8   22.40    3.13
  -1  -8   8   22.84    1.57
   1  -8  -7   16.90    1.34
  -1   8   7   15.04    2.35
  -1  -8   7   15.44    2.46
  -1  -8   7   16.32    1.34
  -1  -8   7   18.86    1.51
   1  -8  -7   14.07    2.44
   1  -8  -7   17.38    1.33
   1   8  -7   15.94    2.59
   1   8  -7   14.63    2.54
  -1   8   7   16.12    2.31
  -1   8   7   15.57    2.36
   1   8  -7   15.20    2.37
   1   8  -6   49.33    4.40
  -1  -8   6   43.72    3.99
   1  -8  -6   51.42    4.50
  -1   8   6   46.05    3.74
  -1   8   6   47.01    3.95
  -1   8   6   46.89    4.12
   1   8  -6   42.57    4.00
   1  -8  -5   98.37    6.16
   1   8  -5  112.65    6.61
   1  -8  -5  115.62    6.44
  -1   8   5  114.66    5.75
   1   8  -5  103.10    6.13
  -1  -8   5  112.83    6.41
  -1   8   5  110.46    5.77
  -1   8   5  113.33    6.43
   1   8  -4  211.85    9.07
   1  -8  -4  201.79    8.75
  -1   8   4  191.40    7.59
  -1  -8   4  195.62    7.41
  -1   8   4  192.45    8.51
   1   8  -4  188.36    8.20
   1  -8  -4  188.72    8.19
   1  -8  -3   84.11    5.44
   1   8  -3   78.50    5.43
   1   8  -3   78.12    5.39
  -1   8   3   86.70    5.57
  -1  -8   3   79.78    4.69
   1  -8  -3   78.97    5.09
  -1   8   3   83.20    4.77
   1   8  -3   79.46    5.08
  -1  -8   3   82.39    4.84
   1  -8  -2    2.59    1.06
   1   8  -2    2.49    1.20
  -1   8   2    3.45    1.29
  -1   8   2    0.83    0.69
   1  -8  -2    3.94    1.32
  -1  -8   2    2.37    1.13
   1   8  -2    2.16    1.07
  -1  -8   2    1.14    0.99
   1   8  -2    0.39    0.93
  -1  -8   1   59.03    4.20
   1  -8  -1   60.12    4.48
   1   8  -1   66.07    4.61
   1   8  -1   61.65    4.36
   1   8  -1   61.44    3.98
  -1   8   1   63.18    4.11
  -1  -8   1   58.29    4.15
  -1   8   1   59.06    4.18
   1   8  -1   62.88    4.78
  -1   8   1   66.10    4.84
   1  -8  -1   57.40    4.16
   1   8  -1   58.93    4.63
  -1   8   0  213.56    8.93
  -1   8   0  198.69    7.99
   1   8   0  197.98    8.67
   1  -8   0  202.80    7.82
   1   8   0  208.83    8.02
   1   8   0  217.40    9.07
   1   8   0  213.52    8.39
  -1  -8   0  204.37    8.15
  -1  -8   0  211.92    8.34
   1  -8   0  202.83    8.36
   1   8   1   64.75    4.84
   1  -8   1   62.03    4.45
  -1  -8  -1   57.52    4.31
  -1  -8  -1   61.12    4.40
   1  -8   1   59.17    4.00
   1   8   1   62.75    4.43
  -1   8  -1   63.45    4.76
   1   8   1   58.97    4.11
  -1   8  -1   61.10    4.34
   1   8   1   59.49    4.63
  -1   8  -2    0.63    0.83
   1   8   2    1.93    0.91
  -1  -8  -2    1.59    0.73
   1  -8   2    3.33    1.18
   1   8   2    1.64    0.77
  -1   8  -2    1.88    0.93
   1   8   2    1.26    0.78
  -1  -8  -2    2.55    1.09
   1   8   3   80.22    5.41
  -1  -8  -3   86.71    5.40
   1   8   3   79.56    5.32
  -1   8  -3   68.90    5.03
   1   8   3   78.71    4.90
  -1   8  -3   76.66    4.99
   1  -8   3   82.67    5.05
  -1  -8  -3   76.34    5.22
  -1   8  -4  196.89    8.30
   1   8   4  188.85    7.78
  -1  -8  -4  198.30    8.63
   1  -8   4  199.59    8.01
   1   8   4  194.66    8.54
   1   8   4  189.71    8.35
  -1   8  -4  196.63    8.53
  -1  -8  -4  203.53    8.57
  -1   8  -4  183.14    8.40
  -1   8  -4  199.28    8.64
   1   8   5  101.06    5.57
  -1  -8  -5   95.17    6.02
   1  -8   5  106.90    5.71
   1   8   5  102.58    6.09
  -1   8  -5  103.03    6.22
  -1   8  -5   97.13    5.85
   1   8   5   95.47    5.82
  -1  -8  -5  107.83    6.24
  -1   8  -5   96.06    5.96
  -1   8  -5   99.55    6.17
  -1  -8  -6   45.21    4.06
   1  -8   6   43.53    3.68
   1  -8   6   46.98    3.72
  -1   8  -6   44.89    4.22
   1   8   6   49.09    4.15
  -1   8  -6   40.82    3.93
   1   8   6   47.01    3.78
   1   8   6   43.02    3.94
  -1   8  -6   44.10    4.08
  -1   8  -6   46.87    4.11
  -1  -8  -6   49.55    4.40
  -1  -8  -7   15.21    1.28
  -1  -8  -7   16.13    2.53
   1  -8   7   15.68    1.31
  -1   8  -7   16.68    2.65
  -1  -8  -7   14.50    2.56
   1   8   7   19.05    2.43
  -1   8  -7   14.68    2.44
   1  -8   7   16.60    2.39
   1   8   7   16.85    2.43
  -1   8  -7   14.35    2.36
  -1   8  -7   16.11    2.58
  -1  -8  -7   15.35    1.27
   1   8   7   14.71    2.24
   1  -8   7   16.68    1.38
   1  -8   8   19.95    1.47
  -1  -8  -8   19.34    1.42
  -1  -8  -8   19.43    2.83
   1  -8   8   19.26    2.59
  -1   8  -8   20.92    2.94
  -1  -8  -8   23.55    1.57
  -1   8  -8   22.55    3.12
   1  -8   8   21.41    1.42
   1  -8   8   21.32    1.57
  -1   8  -8   19.41    2.78
   1   8   8   22.76    2.78
  -1  -8  -9  100.97    6.52
   1  -8   9  101.15    3.18
  -1   8  -9  101.54    6.25
   1  -8   9   95.84    3.35
   1  -8   9   99.83    3.53
  -1   8  -9  103.44    6.60
   1  -8   9   93.51    5.77
  -1  -8  -9  103.10    3.41
  -1   8  -9  103.34    6.72
  -1   8  -9   99.00    3.14
  -1  -8  -9   97.80    3.29
   1   8   9  101.87    6.21
   1   8   9   99.41    6.40
  -1  -8 -10    5.86    0.88
  -1  -8 -10    6.66    1.91
   1  -8  10    6.27    0.93
  -1   8 -10    4.67    0.82
   1  -8  10    5.98    1.62
  -1   8 -10    3.84    1.51
  -1   8 -10    4.82    0.78
  -1   8 -10    3.68    1.35
  -1   8 -10    5.04    1.87
   1   8  10    7.27    1.85
   1  -8  10    5.41    0.86
  -1  -8 -10    5.69    0.88
   1   8  10    4.94    1.58
  -1  -8 -11   25.93    1.63
  -1   8 -11   26.10    3.23
  -1  -8 -11   24.37    1.64
   1  -8  11   26.56    1.75
  -1   8 -11   29.25    3.63
  -1  -8 -11   26.62    3.48
   1  -8  11   26.87    3.27
   1   8  11   31.93    3.68
   1   8  11   27.16    3.28
  -1  -8 -11   28.12    1.79
  -1   8 -11   27.78    1.77
  -1   8 -11   26.09    1.63
   1  -8  11   28.41    1.86
  -1   8 -11   27.01    3.67
  -1  -8 -12   14.56    1.27
   1  -8  12   15.01    1.34
   1   8  12   13.47    2.57
   1  -8  12   14.39    2.43
  -1   8 -12   16.67    1.30
   1  -8  12   15.14    1.42
  -1   8 -12   14.84    2.86
  -1  -8 -12   14.97    1.33
  -1   8 -12   14.22    1.27
  -1   8 -12   17.08    2.88
   1   8  12   16.23    2.58
  -1  -8 -12   14.66    1.29
  -1  -8 -13    6.95    0.88
   1   8  13    5.26    1.50
   1  -8  13    6.50    1.03
  -1   8 -13    7.98    1.01
  -1  -8 -13    6.57    0.89
  -1   8 -13    6.38    0.87
   1   8  13    6.16    1.97
   1  -8  13    5.69    1.69
   1  -8  13    6.71    0.95
  -1  -8 -13    7.11    1.01
  -1   8 -13    5.10    1.79
  -1   8 -14   85.02    3.18
   1  -8  14   85.98    5.98
   1   8  14   85.16    6.43
  -1  -8 -14   81.38    2.98
   1  -8  14   84.73    3.18
  -1  -8 -14   84.05    3.07
  -1  -8 -14   86.88    3.21
   1  -8  14   84.80    3.40
  -1   8 -14   83.04    6.41
  -1   8 -14   85.93    3.10
  -1   8 -15   45.79    4.76
   1   8  15   44.16    4.37
  -1   8 -15   42.75    2.30
  -1   8 -15   45.56    2.28
  -1  -8 -15   43.31    2.18
  -1  -8 -15   44.60    2.28
   1  -8  15   43.08    2.19
   1  -8  15   42.63    4.21
   1   8  15   48.37    4.85
  -1   8 -15   41.93    2.13
   1  -8  15   43.17    2.39
  -1  -8 -15   43.49    2.11
   1   8  16   71.19    5.50
   1  -8  16   66.30    5.24
  -1   8 -16   70.80    2.83
   1  -8  16   72.36    2.84
   1  -8  16   70.21    3.03
  -1   8 -16   73.94    6.02
  -1  -8 -16   75.77    2.93
  -1  -8 -16   69.52    2.62
  -1  -8 -16   70.51    2.83
  -1   8 -16   74.90    2.95
  -1   8 -16   73.93    3.00
   1  -8  17    2.47    0.72
  -1  -8 -17    2.98    0.68
  -1   8 -17    2.72    0.68
  -1  -8 -17    2.62    0.61
   1   8  17    1.32    1.08
  -1   8 -17    3.95    0.78
   1  -8  17    2.39    1.35
   1  -8  17    2.96    0.66
   1   8  17    3.70    1.62
  -1  -8 -17    3.97    0.77
  -1   8 -17    3.83    0.72
   1  -8  18   45.82    2.32
  -1  -8 -18   44.87    2.15
  -1  -8 -18   45.85    2.14
  -1   8 -18   43.36    2.13
  -1  -8 -18   41.50    1.83
  -1   8 -18   46.04    2.22
   1  -8  18   44.85    2.05
  -1   8 -18   47.26    2.26
   1   8  18   47.21    4.55
  -1   8 -19   11.58    1.09
   1  -8  19    9.95    1.07
  -1   8 -19   10.04    1.01
   1  -8  19    9.23    0.90
  -1  -8 -19    9.63    0.97
  -1   8 -19   10.06    1.04
  -1  -8 -19    9.39    0.96
   1  -8  20   56.11    2.04
  -1  -8 -20   55.61    2.15
  -1   8 -20   55.42    2.28
  -1   8 -20   54.15    2.21
   1  -8  20   53.78    2.36
  -1  -8 -20   52.74    2.20
  -1   8 -20   54.93    2.18
  -1  -8 -21   88.28    2.55
  -1  -8 -21   84.33    2.67
  -1   8 -21   87.94    2.72
  -1   8 -21   88.23    2.78
  -1   8 -21   84.24    2.56
   1  -8  21   84.93    2.83
  -1   8 -22   23.01    1.14
  -1   8 -22   25.00    1.34
  -1  -8 -22   24.28    1.27
   1  -8  22   25.31    1.40
  -1   8 -22   23.96    1.29
  -1  -8 -22   21.75    1.13
  -1   8 -23    3.04    0.49
   1  -8  23    2.94    0.50
  -1   8 -23    3.10    0.48
  -1  -8 -23    3.84    0.50
  -1   8 -24    1.23    0.32
  -1  -8 -24    1.00    0.29
   1  -8  24    0.86    0.29
   1  -9 -23    4.70    0.45
  -1  -9  23    4.24    0.44
  -1  -9  22    9.81    0.76
   1   9 -22    9.54    0.70
   1  -9 -22    9.46    0.72
   1   9 -22    9.96    0.66
   1   9 -21   92.35    2.41
  -1  -9  21   93.77    2.68
  -1  -9  21   89.18    2.18
   1   9 -21   92.87    2.59
   1  -9 -21   95.41    2.61
   1  -9 -20   81.64    2.55
  -1  -9  20   75.33    2.21
   1  -9 -20   83.00    2.46
   1   9 -20   80.81    2.59
   1   9 -20   79.15    2.28
   1   9 -20   76.48    2.19
   1  -9 -20   78.54    2.14
   1   9 -20   79.42    2.38
  -1  -9  20   81.54    2.66
   1  -9 -19   25.35    1.49
   1   9 -19   25.29    1.37
  -1  -9  19   22.34    1.27
   1  -9 -19   25.38    1.44
   1  -9 -19   24.82    1.30
   1   9 -19   22.92    1.44
  -1  -9  19   24.82    1.52
   1   9 -19   22.43    1.32
   1   9 -19   24.30    1.27
   1   9 -18   29.20    1.48
   1  -9 -18   30.07    1.66
   1  -9 -18   29.42    1.53
  -1  -9  18   27.89    1.52
   1   9 -18   32.38    1.68
   1   9 -18   31.30    1.78
   1   9 -18   30.60    1.57
   1  -9 -18   28.78    1.64
  -1  -9  18   32.15    1.84
  -1  -9  17   62.84    2.42
   1  -9 -17   61.01    2.50
   1  -9 -17   64.40    2.42
   1  -9 -17   64.80    2.55
   1   9 -17   65.84    2.70
   1   9 -17   64.16    2.58
   1   9 -17   64.03    2.42
  -1  -9  17   64.48    2.73
   1   9 -16   25.73    1.55
  -1  -9  16   26.54    1.79
  -1  -9  16   24.25    1.55
  -1  -9  16   24.99    3.36
   1  -9 -16   28.76    1.73
   1   9 -16   26.79    1.76
   1  -9 -16   27.92    1.72
  -1  -9  16   26.75    1.57
   1  -9 -16   24.48    1.54
   1  -9 -15   42.10    2.09
   1  -9 -15   44.71    2.20
   1   9 -15   40.28    1.96
   1  -9 -15   42.23    2.16
  -1  -9  15   43.61    4.47
  -1  -9  15   41.36    2.02
  -1  -9  15   39.64    2.23
  -1  -9  15   38.65    2.02
   1   9 -15   39.64    2.19
  -1  -9  14   85.12    3.35
  -1  -9  14   82.63    3.01
   1  -9 -14   81.99    3.10
  -1  -9  14   77.64    2.99
   1   9 -14   84.68    2.94
   1  -9 -14   85.75    3.18
   1  -9 -14   85.43    3.08
   1   9 -14   82.95    3.24
  -1  -9  13   18.44    1.48
  -1  -9  13   18.23    1.44
   1  -9 -13   18.46    1.50
   1   9 -13   20.03    1.38
  -1  -9  13   18.31    2.90
   1   9 -13   16.62    2.93
   1  -9 -13   19.79    1.48
   1  -9 -13   19.95    1.52
   1   9 -13   18.56    1.53
  -1  -9  13   18.35    1.55
   1   9 -12   -0.20    1.02
   1  -9 -12    1.63    0.61
  -1  -9  12    1.04    0.67
  -1  -9  12    1.15    0.93
   1   9 -12    0.97    0.51
   1  -9 -12    1.53    0.62
  -1  -9  12    1.02    0.55
   1  -9 -12    1.75    0.65
  -1  -9  12    0.35    0.39
   1   9 -12    0.14    0.96
   1   9 -11   32.30    3.77
  -1  -9  11   34.56    2.14
   1  -9 -11   34.72    2.03
  -1  -9  11   35.23    1.99
   1  -9 -11   34.75    1.98
   1   9 -11   34.88    1.81
   1   9 -11   34.22    3.68
  -1  -9  11   34.72    3.98
   1  -9 -11   35.11    1.98
  -1  -9  11   34.82    2.01
   1   9 -11   37.96    4.31
   1  -9 -10   43.32    2.23
   1  -9 -10   39.14    4.50
  -1  -9  10   40.28    4.29
  -1  -9  10   44.09    2.42
  -1  -9  10   40.75    2.22
  -1  -9  10   40.89    2.15
   1  -9 -10   42.06    2.12
   1  -9 -10   42.26    2.22
   1   9 -10   43.60    4.38
   1   9 -10   46.32    4.66
  -1  -9   9   12.29    1.21
   1   9  -9   11.70    2.42
  -1  -9   9   12.47    1.27
   1  -9  -9   13.21    1.17
   1   9  -9    7.55    1.94
   1  -9  -9   11.48    1.15
  -1  -9   9   15.27    2.83
   1  -9  -9    9.94    2.42
  -1   9   9   14.28    2.46
   1   9  -9   12.08    2.42
   1  -9  -9   12.96    1.26
  -1  -9   9   12.93    1.34
  -1  -9   9   11.08    1.09
  -1  -9   8    4.47    0.84
  -1  -9   8    3.21    0.64
   1   9  -8    1.73    1.17
   1  -9  -8    2.41    1.36
   1  -9  -8    3.88    0.65
   1   9  -8    4.02    1.47
   1  -9  -8    3.60    0.80
   1  -9  -8    5.31    0.90
  -1  -9   8    6.42    1.73
   1  -9  -8    2.86    0.70
  -1   9   8    0.94    1.04
  -1  -9   8    4.62    0.80
  -1  -9   8    4.46    0.88
  -1  -9   7  159.98    8.27
  -1  -9   7  165.06    4.43
  -1  -9   7  162.58    4.42
   1  -9  -7  160.06    4.48
   1   9  -7  156.22    8.40
  -1   9   7  160.96    8.35
   1  -9  -7  162.02    4.30
  -1  -9   7  162.77    4.63
   1  -9  -7  163.48    4.34
   1   9  -7  164.87    8.54
   1  -9  -7  160.66    4.45
  -1  -9   7  169.06    4.85
   1  -9  -7  172.35    9.06
  -1  -9   6    1.05    0.53
  -1  -9   6    1.80    0.63
   1  -9  -6    1.14    0.50
  -1  -9   6    1.01    0.44
   1  -9  -6    1.08    0.53
   1  -9  -6    0.65    0.84
   1   9  -6    1.04    0.95
   1  -9  -6    2.34    0.61
  -1  -9   6    0.55    0.42
   1   9  -6    1.76    1.22
   1   9  -6    1.57    1.02
   1  -9  -6    1.37    0.53
  -1   9   6   -1.53    1.04
   1  -9  -5   10.99    1.12
  -1  -9   5   11.38    1.23
   1  -9  -5   10.42    2.33
  -1  -9   5   12.74    1.16
   1  -9  -5   10.43    1.11
  -1  -9   5   12.72    1.26
  -1   9   5   13.25    2.49
   1   9  -5   14.54    2.55
   1  -9  -5   12.46    1.17
   1   9  -5   12.23    2.35
  -1  -9   5   11.98    1.13
   1   9  -5   11.25    2.25
  -1   9   4   28.59    3.06
   1   9  -4   21.73    2.99
  -1  -9   4   24.28    1.72
   1  -9  -4   24.56    1.63
  -1   9   4   26.36    3.36
  -1   9   4   25.69    3.02
   1  -9  -4   29.04    3.55
   1  -9  -4   26.90    1.74
  -1  -9   4   24.59    1.57
  -1  -9   4   27.12    1.68
   1   9  -4   23.28    3.24
  -1  -9   4   26.71    1.80
   1  -9  -4   25.26    1.65
   1  -9  -3   17.15    2.77
  -1  -9   3   16.89    1.40
  -1   9   3   17.74    2.55
  -1  -9   3   20.10    1.56
  -1   9   3   19.28    2.61
   1   9  -3   16.82    2.51
  -1  -9   3   18.25    1.36
   1   9  -3   21.16    3.11
   1  -9  -3   19.19    1.41
  -1   9   3   18.15    2.76
  -1  -9   3   18.58    1.46
   1  -9  -3   17.57    1.33
   1  -9  -3   19.00    1.45
   1  -9  -3   20.14    1.49
  -1  -9   2    6.98    1.54
   1  -9  -2    3.53    0.69
  -1  -9   2    4.05    0.72
  -1  -9   2    2.91    0.63
  -1  -9   2    4.24    0.78
   1  -9  -2    4.42    0.84
   1   9  -2    3.38    1.35
   1  -9  -2    2.93    0.61
   1   9  -2    1.39    1.14
   1  -9  -2    3.34    1.23
  -1   9   2    2.59    1.07
   1  -9  -2    2.99    0.68
  -1  -9   2    2.54    0.53
  -1  -9   2    3.24    0.70
  -1   9   2    3.40    1.30
   1  -9  -1   80.64    2.84
   1   9  -1   79.67    5.86
  -1  -9   1   77.52    5.18
  -1   9   1   75.02    5.04
  -1  -9   1   77.71    3.07
   1  -9  -1   75.80    5.48
   1  -9  -1   84.75    3.05
   1   9  -1   83.68    6.03
   1   9  -1   82.23    5.34
  -1  -9   1   78.06    5.30
  -1  -9   1   84.13    2.85
   1  -9  -1   84.45    3.03
  -1  -9   1   80.91    2.90
  -1  -9   1   81.75    3.03
  -1  -9   1   82.69    3.09
  -1   9   1   79.87    5.85
   1  -9  -1   84.07    3.04
  -1  -9   0    5.93    1.42
   1   9   0    6.25    1.48
   1   9   0    6.24    1.87
  -1  -9   0    4.98    0.75
   1  -9   0    6.25    0.86
  -1  -9   0    5.37    1.55
   1  -9   0    5.59    0.87
   1  -9   0    6.23    0.78
   1  -9   0    5.65    1.64
  -1  -9   0    6.32    0.87
  -1  -9   0    4.94    0.83
   1   9   0    4.70    1.51
  -1   9   0    6.51    1.57
  -1   9   0    5.11    1.68
   1  -9   0    5.09    0.82
  -1  -9   0    5.26    0.90
  -1  -9   0    5.56    0.88
   1  -9   1   84.19    3.11
   1  -9   1   81.43    3.01
   1   9   1   84.84    6.05
  -1  -9  -1   85.38    3.06
  -1   9  -1   80.71    5.33
   1   9   1   81.04    5.47
  -1  -9  -1   90.90    5.77
   1  -9   1   89.33    5.85
   1   9   1   78.37    5.84
  -1   9  -1   80.07    5.83
  -1  -9  -1   79.33    3.01
   1  -9   1   81.50    2.78
  -1  -9  -1   83.98    3.16
  -1   9  -1   83.64    5.99
  -1  -9  -1   82.10    5.57
   1   9   1   86.07    5.30
   1  -9   1   80.94    3.05
  -1  -9  -1   79.17    2.88
  -1  -9  -1   80.57    2.87
  -1  -9  -2    4.42    1.46
  -1  -9  -2    3.83    0.71
  -1   9  -2    2.47    1.22
   1  -9   2    3.71    0.80
   1   9   2    4.75    1.21
  -1   9  -2    3.91    1.46
  -1   9  -2    3.63    1.29
   1  -9   2    4.88    0.85
   1   9   2    4.29    1.51
  -1  -9  -2    4.65    0.78
   1   9   2    4.08    1.41
  -1   9  -2    2.90    1.36
   1  -9   2    4.41    1.48
  -1  -9  -2    4.59    0.80
   1  -9   2    3.42    0.71
   1   9   2    4.06    1.55
  -1  -9  -2    3.36    0.62
  -1  -9  -2    5.24    1.64
  -1  -9  -3   16.21    1.38
   1  -9   3   17.90    1.40
   1  -9   3   15.11    2.32
  -1  -9  -3   17.83    1.40
  -1  -9  -3   17.39    1.37
  -1   9  -3   16.26    2.48
  -1  -9  -3   18.01    2.70
   1  -9   3   16.22    1.38
  -1   9  -3   16.98    2.64
  -1  -9  -3   17.05    1.29
  -1   9  -3   18.14    2.86
   1  -9   3   16.70    1.39
   1   9   3   17.98    2.80
   1   9   3   16.13    2.45
   1   9   3   15.80    2.66
  -1   9  -3   14.55    2.52
  -1  -9  -3   16.41    2.59
  -1  -9  -4   23.46    1.66
   1  -9   4   27.03    1.73
  -1  -9  -4   25.51    1.56
   1   9   4   24.14    3.25
   1  -9   4   26.69    3.03
  -1   9  -4   25.02    3.30
   1   9   4   24.16    2.94
   1  -9   4   26.88    1.73
  -1  -9  -4   23.94    1.58
   1  -9   4   25.94    1.66
  -1  -9  -4   26.89    1.67
  -1   9  -4   27.22    3.37
  -1  -9  -4   27.41    3.31
   1   9   4   24.74    3.24
  -1  -9  -4   25.55    3.21
  -1   9  -4   25.75    3.08
  -1   9  -4   21.21    3.12
   1   9   5    9.82    2.14
  -1   9  -5    8.84    2.01
  -1  -9  -5    9.85    2.23
  -1  -9  -5   10.15    1.04
   1  -9   5   10.46    1.08
  -1   9  -5    9.55    2.04
   1   9   5    8.47    1.89
   1  -9   5   11.21    1.20
  -1   9  -5   12.16    2.33
  -1  -9  -5   11.53    2.29
   1   9   5   11.42    2.07
  -1  -9  -5   10.41    1.09
   1  -9   5   11.97    1.15
  -1  -9  -5   11.00    1.06
  -1   9  -5   10.46    2.22
  -1  -9  -6    1.25    1.33
  -1   9  -6    1.24    0.93
  -1   9  -6    2.99    1.27
  -1   9  -6    0.40    0.95
   1  -9   6    1.84    0.63
   1   9   6    2.74    1.46
  -1   9  -6    2.16    1.12
  -1  -9  -6    1.60    0.61
  -1  -9  -6    2.05    0.65
  -1  -9  -6    1.52    0.55
  -1  -9  -6    2.33    1.46
   1   9   6    0.13    1.13
   1  -9   6    1.84    0.59
   1  -9   6    0.80    0.45
  -1   9  -7  161.10    8.40
  -1   9  -7  156.25    8.29
  -1  -9  -7  167.78    4.41
   1   9   7  169.74    8.31
   1   9   7  162.70    8.18
  -1  -9  -7  167.35    4.59
  -1   9  -7  179.96    9.09
  -1  -9  -7  170.95    8.79
  -1  -9  -7  164.34    4.50
   1  -9   7  167.20    4.49
   1  -9   7  167.71    4.68
   1  -9   7  165.25    4.71
  -1  -9  -8    3.87    0.78
  -1   9  -8    5.55    1.84
   1  -9   8    3.89    0.76
  -1  -9  -8    3.91    1.67
  -1   9  -8    2.41    1.21
   1  -9   8    3.95    0.73
  -1   9  -8    3.79    1.48
  -1  -9  -8    3.22    0.71
   1   9   8    3.62    1.52
   1  -9   8    3.18    0.77
  -1  -9  -8    3.43    0.78
   1   9   9    8.75    2.04
  -1  -9  -9   11.05    1.19
  -1   9  -9   10.24    2.34
  -1   9  -9   10.79    2.29
   1  -9   9   11.49    1.21
  -1   9  -9    8.79    2.05
  -1  -9  -9    9.72    2.34
  -1  -9  -9   10.74    1.17
   1  -9   9   11.68    1.18
   1   9   9   11.39    2.31
   1  -9   9   12.10    1.17
  -1  -9 -10   39.11    2.10
   1  -9  10   37.55    2.19
  -1  -9 -10   40.08    2.14
   1  -9  10   37.15    2.12
  -1   9 -10   40.73    1.96
  -1   9 -10   41.02    4.48
   1  -9  10   39.19    1.97
  -1   9 -10   40.92    2.08
   1   9  10   38.74    4.03
  -1   9 -10   38.31    4.04
   1   9  10   36.43    4.16
  -1   9 -10   37.49    3.98
   1   9  11   32.79    3.73
   1  -9  11   34.09    2.01
  -1  -9 -11   32.68    1.95
  -1   9 -11   30.70    3.67
  -1   9 -11   33.90    1.92
  -1   9 -11   28.80    3.85
   1  -9  11   32.22    2.05
  -1  -9 -11   30.92    1.89
  -1   9 -11   32.19    1.77
  -1   9 -12    1.53    0.96
  -1   9 -12    1.59    0.57
   1  -9  12    0.99    0.54
  -1  -9 -12    0.47    0.49
  -1  -9 -12    0.68    0.46
   1  -9  12    0.73    0.53
  -1   9 -12    0.61    0.51
  -1  -9 -13   19.32    1.40
   1  -9  13   17.80    1.46
  -1   9 -13   15.46    2.87
  -1  -9 -13   17.90    1.42
   1  -9  13   19.84    1.61
  -1   9 -13   18.83    1.47
  -1   9 -13   18.45    1.38
  -1  -9 -13   18.65    1.50
   1   9  13   18.33    3.11
  -1   9 -14   86.07    3.14
  -1  -9 -14   84.75    2.97
  -1   9 -14   82.75    6.40
   1  -9  14   85.54    3.36
  -1  -9 -14   89.45    3.09
  -1   9 -14   88.00    3.04
   1  -9  14   88.00    3.23
  -1  -9 -14   86.50    3.20
  -1   9 -15   37.31    1.92
  -1   9 -15   36.77    2.11
  -1  -9 -15   40.62    2.13
   1  -9  15   36.89    2.15
   1  -9  15   39.77    2.10
  -1  -9 -15   36.82    1.92
  -1   9 -15   40.76    2.10
  -1   9 -15   37.43    4.27
  -1  -9 -15   37.20    1.89
   1  -9  16   22.81    1.53
  -1  -9 -16   23.74    1.62
  -1   9 -16   24.75    1.58
   1  -9  16   23.74    1.69
  -1  -9 -16   21.59    1.42
  -1   9 -16   24.04    1.65
  -1   9 -16   22.17    1.47
  -1  -9 -16   23.28    1.49
   1   9  16   26.67    3.37
  -1   9 -17   69.82    2.73
   1  -9  17   68.27    2.80
  -1  -9 -17   66.83    2.38
   1  -9  17   69.42    2.58
  -1  -9 -17   68.64    2.65
  -1  -9 -17   67.15    2.49
  -1   9 -17   69.88    2.67
  -1   9 -17   65.13    2.47
  -1   9 -18   29.19    1.65
  -1   9 -18   29.19    1.59
  -1   9 -18   30.08    1.66
   1  -9  18   30.81    1.60
  -1  -9 -18   31.65    1.67
  -1  -9 -18   28.76    1.54
   1  -9  18   31.16    1.79
  -1  -9 -18   28.36    1.42
  -1   9 -19   24.68    1.42
   1  -9  19   24.82    1.34
  -1  -9 -19   24.79    1.42
  -1  -9 -19   24.01    1.35
  -1   9 -19   25.25    1.38
  -1   9 -19   24.59    1.43
   1  -9  19   26.94    1.59
  -1   9 -19   23.51    1.25
  -1   9 -20   82.60    2.45
  -1  -9 -20   78.10    2.36
  -1   9 -20   82.51    2.56
   1  -9  20   83.17    2.28
  -1  -9 -20   83.21    2.48
   1  -9  20   82.83    2.69
  -1   9 -20   80.65    2.47
   1  -9  21   98.74    2.77
  -1  -9 -21   98.86    2.51
  -1   9 -21   96.25    2.49
  -1   9 -21   99.80    2.66
  -1  -9 -21   91.89    2.41
  -1   9 -21   94.06    2.45
   1  -9  22    9.21    0.77
  -1   9 -22    9.57    0.71
  -1   9 -22    8.71    0.65
  -1   9 -22    8.06    0.56
  -1  -9 -22    8.17    0.60
  -1  -9 -22    8.07    0.59
  -1   9 -23    4.60    0.45
   1  -9  23    4.47    0.47
  -1 -10  21   17.74    0.93
   1 -10 -21   19.31    0.84
   1  10 -21   18.87    0.92
  -1 -10  20   36.26    1.51
   1 -10 -20   38.13    1.39
   1  10 -20   37.27    1.47
   1  10 -20   34.81    1.22
   1  10 -19    2.76    0.53
   1 -10 -19    2.67    0.49
   1 -10 -19    2.76    0.44
   1 -10 -19    2.40    0.50
   1  10 -19    2.75    0.48
   1  10 -19    2.58    0.42
  -1 -10  19    2.52    0.53
  -1 -10  18    1.49    0.45
   1 -10 -18    1.09    0.38
   1 -10 -18    1.97    0.46
   1  10 -18    1.80    0.46
   1  10 -18    1.62    0.38
   1 -10 -18    2.34    0.48
   1  10 -18    1.77    0.50
   1 -10 -17   19.05    1.19
   1  10 -17   17.35    1.25
   1  10 -17   18.31    1.10
   1 -10 -17   21.16    1.34
  -1 -10  17   17.60    1.30
   1  10 -17   18.69    1.30
   1 -10 -17   18.93    1.24
   1  10 -16    3.17    0.56
  -1 -10  16    2.67    0.65
  -1 -10  16    2.16    0.54
  -1 -10  16    1.80    0.44
   1 -10 -16    2.23    0.58
   1  10 -16    2.00    0.60
   1 -10 -16    3.20    0.65
   1 -10 -16    2.68    0.63
   1  10 -16    2.44    0.60
  -1 -10  15    6.77    0.81
  -1 -10  15    7.04    0.83
   1 -10 -15    7.55    0.90
   1 -10 -15    7.57    0.91
  -1 -10  15    6.65    0.92
   1  10 -15    7.17    0.91
   1  10 -15    7.76    0.80
   1 -10 -15    7.12    0.85
   1 -10 -14  215.64    5.20
   1 -10 -14  214.76    5.05
  -1 -10  14  211.21    5.00
  -1 -10  14  215.36    5.45
   1  10 -14  216.11    5.33
  -1 -10  14  202.32    4.71
   1 -10 -14  206.40    4.93
   1  10 -14  210.80    4.65
   1 -10 -13   30.83    1.75
   1 -10 -13   33.51    1.88
   1  10 -13   32.10    1.93
  -1 -10  13   33.74    2.04
  -1 -10  13   30.69    1.80
  -1 -10  13   31.28    1.71
   1 -10 -13   31.27    1.86
  -1 -10  12    4.86    0.75
   1  10 -12    4.03    1.67
   1  10 -12    3.73    1.68
   1 -10 -12    3.44    0.73
  -1 -10  12    4.56    0.79
   1 -10 -12    5.62    0.81
   1  10 -12    5.86    0.89
   1 -10 -12    4.85    0.86
  -1 -10  12    4.62    0.90
   1  10 -11    0.96    0.95
  -1 -10  11    1.04    0.49
   1 -10 -11    1.67    0.60
   1 -10 -11    1.32    0.63
   1  10 -11    0.44    1.08
   1 -10 -11    0.94    0.52
  -1 -10  11    1.10    0.44
  -1 -10  11    1.40    0.68
   1  10 -10   45.98    4.71
  -1 -10  10   50.43    2.28
   1 -10 -10   51.12    2.27
   1  10 -10   51.04    4.56
  -1 -10  10   51.49    2.49
   1 -10 -10   51.59    2.44
  -1 -10  10   51.75    2.60
  -1 -10  10   52.52    2.29
   1  10 -10   53.48    4.91
   1 -10 -10   51.46    2.46
   1 -10  -9    0.88    0.47
   1 -10  -9    0.42    0.50
   1  10  -9    2.59    1.51
   1 -10  -9    0.39    0.56
   1  10  -9    0.17    1.22
  -1 -10   9    1.33    0.63
   1 -10  -9    0.79    0.58
  -1 -10   9    0.40    0.51
  -1 -10   9    0.91    0.58
  -1 -10   9    1.05    0.49
  -1 -10   8   11.64    1.16
  -1 -10   8   10.90    1.23
   1 -10  -8   12.74    1.16
   1  10  -8   11.93    2.34
   1 -10  -8   11.31    1.17
   1 -10  -8   13.00    1.25
  -1  10   8   11.37    2.47
   1 -10  -8   11.19    1.10
  -1 -10   8   11.23    1.11
  -1 -10   8   11.60    1.27
   1  10  -8   11.49    2.37
   1 -10  -7    0.43    0.44
  -1 -10   7    0.89    0.52
  -1 -10   7    0.56    0.47
   1  10  -7    0.33    0.94
   1 -10  -7    0.34    0.51
  -1 -10   7    0.43    0.47
   1 -10  -7   -0.06    0.48
  -1  10   7    0.04    1.00
   1  10  -7    0.85    1.18
  -1 -10   7    0.91    0.50
  -1 -10   6   27.96    1.79
  -1 -10   6   25.32    1.85
  -1  10   6   21.36    3.23
   1 -10  -6   29.14    1.76
   1 -10  -6   26.13    1.67
  -1 -10   6   28.48    1.71
  -1  10   6   26.15    3.54
   1  10  -6   29.26    3.74
   1 -10  -6   28.28    1.81
  -1 -10   6   28.34    1.86
   1  10  -6   30.34    3.84
  -1 -10   5   60.47    2.73
   1  10  -5   55.18    5.19
  -1 -10   5   56.62    2.73
   1 -10  -5   58.77    2.59
  -1  10   5   59.13    5.27
  -1 -10   5   59.29    2.48
  -1  10   5   61.00    5.38
   1 -10  -5   59.03    2.57
   1 -10  -5   56.90    2.48
   1  10  -5   58.14    5.03
   1  10  -5   57.19    5.24
   1 -10  -5   65.66    5.65
  -1 -10   5   59.24    2.62
   1  10  -4    1.91    1.40
  -1 -10   4    2.64    0.77
   1 -10  -4    2.68    0.67
  -1  10   4    2.97    1.50
   1 -10  -4    3.13    0.63
  -1  10   4    3.55    1.46
  -1 -10   4    2.63    0.56
  -1 -10   4    2.57    0.66
   1 -10  -4    2.76    1.66
   1  10  -4    2.61    1.24
  -1 -10   4    3.41    0.75
   1 -10  -4    3.25    0.78
   1  10  -4    3.14    1.52
  -1 -10   3  141.43    4.36
   1 -10  -3  157.43    8.62
   1 -10  -3  138.80    4.19
   1  10  -3  147.97    8.50
   1 -10  -3  141.59    3.95
  -1  10   3  150.71    8.63
   1  10  -3  149.41    7.87
  -1  10   3  150.40    8.60
  -1 -10   3  143.28    4.31
   1  10  -3  140.63    8.36
   1 -10  -3  145.23    4.14
  -1 -10   3  140.57    4.44
   1 -10  -2   99.64    3.38
  -1 -10   2   96.47    3.57
   1  10  -2   91.95    6.09
  -1  10   2   91.52    5.74
   1 -10  -2   98.99    6.70
  -1  10   2  101.29    6.50
   1 -10  -2   94.21    3.23
  -1  10   2   92.87    6.71
   1 -10  -2  103.04    3.52
   1  10  -2   90.95    6.68
  -1  10   2   97.44    6.91
  -1 -10   2   98.38    3.48
  -1 -10   2   98.09    3.53
   1 -10  -2   93.80    3.37
   1 -10  -1   86.47    6.32
  -1  10   1   84.78    5.90
   1  10  -1   79.54    6.22
   1 -10  -1   83.34    2.97
   1  10  -1   86.09    5.85
   1 -10  -1   85.45    3.21
  -1  10   1   88.75    5.67
  -1 -10   1   84.05    3.31
  -1 -10   1   85.80    2.98
   1 -10  -1   84.28    3.23
  -1  10   1   89.27    6.59
  -1  10   1   93.39    6.28
  -1 -10   1   84.47    3.26
   1 -10  -1   86.71    3.17
  -1 -10   1   84.52    3.23
  -1  10   1   84.40    6.37
  -1 -10   0  256.74    6.24
   1 -10   0  264.78    6.14
  -1 -10   0  253.37   10.31
  -1 -10   0  255.27    5.71
  -1  10   0  272.56   10.80
   1 -10   0  251.07    6.04
  -1 -10   0  254.54    5.76
   1 -10   0  261.34    5.69
   1  10   0  262.23   10.16
  -1 -10   0  257.17    6.08
   1 -10   0  261.87   10.98
  -1  10   0  248.25    9.92
   1 -10   0  259.34    6.01
  -1  10   0  261.00   11.47
  -1  10   0  248.02   11.29
   1  10   0  260.47   11.48
  -1 -10  -1   85.65    6.13
   1 -10   1   85.81    6.11
   1 -10   1   90.62    3.33
   1 -10   1   89.79    3.31
  -1 -10  -1   89.61    3.31
  -1  10  -1   87.90    6.09
  -1  10  -1   86.45    6.54
  -1  10  -1   91.98    5.93
  -1 -10  -1   90.01    3.14
   1 -10   1   88.03    2.95
  -1 -10  -1   88.48    3.39
  -1 -10  -1   92.58    6.19
  -1 -10  -1   87.43    3.05
   1  10   1   83.64    6.39
   1 -10   1   88.12    3.24
  -1  10  -1   96.30    6.82
  -1  10  -2  100.79    6.62
  -1  10  -2   93.24    6.07
   1 -10   2   94.91    3.42
   1 -10   2   99.75    3.52
   1 -10   2   98.73    6.40
  -1 -10  -2  100.30    3.50
   1  10   2  103.87    7.11
   1 -10   2  100.33    3.53
  -1  10  -2   99.26    6.96
  -1 -10  -2   93.84    6.30
  -1 -10  -2   87.21    6.27
  -1 -10  -2   99.42    3.59
  -1  10  -2   96.25    6.81
  -1 -10  -2   97.71    3.35
  -1 -10  -3  139.25    3.89
  -1 -10  -3  150.07    4.26
   1 -10   3  141.97    4.31
  -1 -10  -3  145.82    4.44
  -1  10  -3  135.05    7.44
  -1  10  -3  143.57    8.42
   1  10   3  140.85    8.25
  -1  10  -3  140.11    7.93
  -1 -10  -3  146.35    4.30
   1 -10   3  147.93    4.37
   1 -10   3  148.71    4.42
  -1  10  -3  143.48    7.70
  -1 -10  -3  135.39    7.95
  -1 -10  -3  149.54    8.12
  -1  10  -3  152.62    8.60
   1  10   4    2.01    1.27
  -1  10  -4    3.80    1.55
  -1  10  -4    4.45    1.61
  -1 -10  -4    2.67    0.69
   1 -10   4    3.38    0.77
  -1  10  -4    2.91    1.44
  -1 -10  -4    0.41    0.94
  -1 -10  -4    3.18    0.65
   1 -10   4    3.42    0.70
  -1  10  -4    3.28    1.44
   1 -10   4    2.51    0.65
  -1 -10  -4    4.86    2.04
  -1 -10  -4    3.43    0.77
  -1 -10  -5   55.26    2.54
  -1  10  -5   51.46    4.89
  -1 -10  -5   54.47    5.00
  -1 -10  -5   56.17    2.52
  -1 -10  -5   56.08    2.44
   1 -10   5   57.97    2.57
  -1  10  -5   56.55    4.98
  -1  10  -5   53.61    5.05
   1  10   5   57.32    5.17
   1 -10   5   52.22    2.56
   1 -10   5   57.85    2.67
  -1 -10  -6   29.63    1.83
   1 -10   6   30.06    1.91
  -1 -10  -6   28.74    1.77
   1  10   6   29.39    3.67
  -1 -10  -6   27.91    1.72
   1 -10   6   27.88    1.86
  -1  10  -6   23.27    3.35
   1  10   6   26.78    3.46
   1 -10   6   26.59    1.74
  -1  10  -6   31.90    3.91
   1  10   7    0.04    1.16
  -1  10  -7    0.51    0.97
  -1  10  -7    1.93    1.23
   1 -10   7    0.55    0.49
  -1 -10  -7    2.03    0.66
   1  10   7    1.65    1.24
  -1 -10  -7    0.53    0.55
  -1 -10  -7    0.44    0.51
   1 -10   7    1.03    0.52
   1 -10   7    1.24    0.62
  -1 -10  -8   13.10    1.26
  -1 -10  -8   12.68    1.21
   1 -10   8   12.88    1.31
  -1  10  -8   10.66    2.28
   1 -10   8   13.10    1.23
  -1  10  -8   14.47    1.22
   1  10   8   12.28    2.50
   1 -10   8   14.34    1.38
  -1 -10  -8   13.08    1.21
  -1  10  -8   14.00    2.66
  -1  10  -9    1.67    0.59
   1 -10   9    0.72    0.53
   1 -10   9    1.19    0.59
   1 -10   9    0.66    0.53
  -1  10  -9    0.24    0.93
  -1  10  -9    0.72    1.02
  -1 -10  -9    0.82    0.57
  -1 -10  -9    1.50    0.61
   1  10   9    1.42    1.04
  -1 -10  -9    1.26    0.54
  -1 -10 -10   47.77    2.35
  -1  10 -10   48.68    4.87
   1 -10  10   47.46    2.45
   1 -10  10   45.18    2.38
  -1  10 -10   47.73    2.23
   1 -10  10   50.34    2.23
  -1 -10 -10   50.49    2.39
  -1  10 -10   43.39    4.36
   1 -10  11    0.49    0.45
  -1  10 -11    0.72    0.43
   1 -10  11    1.25    0.57
  -1 -10 -11    1.19    0.61
  -1  10 -11    0.73    0.90
  -1  10 -11    0.61    1.01
  -1 -10 -11    0.30    0.50
  -1 -10 -12    4.43    0.80
   1 -10  12    4.72    0.80
  -1  10 -12    6.79    2.01
  -1 -10 -12    4.67    0.82
  -1  10 -12    5.14    0.79
   1 -10  12    4.56    0.83
  -1 -10 -13   32.50    1.90
   1 -10  13   32.71    1.91
   1 -10  13   32.68    1.96
  -1 -10 -13   32.54    1.84
  -1  10 -13   33.73    1.84
  -1  10 -13   27.23    3.63
  -1  10 -14  212.38    5.01
  -1  10 -14  217.60   10.16
  -1 -10 -14  212.08    5.01
  -1  10 -14  218.84    5.38
   1 -10  14  212.43    5.19
  -1  10 -14  222.62    4.82
  -1 -10 -14  219.30    5.22
   1 -10  14  213.02    5.38
   1 -10  15    8.20    1.01
  -1  10 -15    9.29    0.86
   1 -10  15    9.97    0.99
  -1 -10 -15    8.13    0.89
  -1  10 -15    8.79    0.93
  -1 -10 -15    9.40    1.01
  -1  10 -15    8.51    0.98
  -1  10 -15    7.69    2.02
  -1  10 -16    2.56    0.51
  -1  10 -16    2.86    0.63
  -1 -10 -16    2.19    0.60
  -1 -10 -16    2.96    0.57
   1 -10  16    2.02    0.56
   1 -10  16    2.61    0.60
  -1  10 -16    2.63    0.54
   1 -10  17   16.84    1.15
  -1 -10 -17   15.79    1.18
  -1  10 -17   17.82    1.27
  -1  10 -17   15.22    1.01
   1 -10  17   15.44    1.22
  -1  10 -17   17.11    1.16
   1 -10  18    1.80    0.48
  -1  10 -18    2.35    0.50
   1 -10  18    2.07    0.50
  -1  10 -18    1.60    0.40
  -1  10 -18    2.01    0.45
  -1  10 -18    1.98    0.51
  -1 -10 -18    2.92    0.61
   1 -10  19    3.35    0.57
  -1 -10 -19    3.29    0.52
  -1  10 -19    2.83    0.49
  -1  10 -19    2.60    0.45
   1 -10  19    2.84    0.45
  -1  10 -19    2.62    0.40
  -1  10 -19    2.63    0.49
  -1  10 -20   34.78    1.19
  -1  10 -20   38.50    1.42
  -1 -10 -20   38.67    1.43
   1 -10  20   36.93    1.50
  -1  10 -20   37.54    1.39
  -1  10 -21   18.88    0.87
  -1 -10 -21   19.24    0.87
   1 -10  21   19.37    0.97
   1  11 -19    9.95    0.68
  -1 -11  19    9.43    0.68
   1  11 -18    1.10    0.32
   1  11 -18    1.30    0.40
  -1 -11  18    1.95    0.40
   1 -11 -17   14.26    0.92
   1  11 -17   14.58    1.01
   1  11 -17   14.21    0.94
   1 -11 -17   16.31    1.04
  -1 -11  17   14.31    1.01
   1  11 -16   21.92    1.30
   1  11 -16   21.62    1.31
   1 -11 -16   23.75    1.32
  -1 -11  16   22.10    1.36
   1 -11 -16   23.44    1.27
   1 -11 -15    1.63    0.52
   1  11 -15    1.14    0.48
   1  11 -15    2.63    0.59
  -1 -11  15    2.36    0.56
   1 -11 -15    1.29    0.48
  -1 -11  15    0.95    0.37
  -1 -11  14   14.00    1.23
   1  11 -14   13.67    1.13
   1 -11 -14   14.45    1.14
   1 -11 -14   14.16    1.12
  -1 -11  14   12.51    1.01
   1  11 -13    2.42    0.57
  -1 -11  13    2.48    0.62
  -1 -11  13    2.54    0.55
   1 -11 -13    2.37    0.56
   1 -11 -13    2.16    0.59
   1 -11 -12  184.78    4.57
  -1 -11  12  182.54    4.81
  -1 -11  12  176.75    4.52
   1  11 -12  186.75    4.73
   1 -11 -12  178.23    4.57
  -1 -11  11   85.94    3.07
  -1 -11  11   87.69    3.27
   1 -11 -11   88.76    3.09
   1  11 -11   83.19    5.87
   1 -11 -11   93.60    3.16
   1  11 -11   85.99    6.08
   1  11 -11   92.29    3.22
   1  11 -10   16.62    2.73
  -1 -11  10   19.01    1.53
   1 -11 -10   18.55    1.41
   1  11 -10   19.02    1.48
   1 -11 -10   18.90    1.43
   1  11 -10   17.43    2.79
   1  11 -10   16.55    2.65
  -1 -11  10   17.53    1.28
  -1 -11  10   16.93    1.39
   1 -11  -9    1.38    0.61
   1 -11  -9    1.57    0.54
   1  11  -9    0.55    1.09
   1  11  -9    1.98    1.22
  -1 -11   9    1.83    0.56
   1  11  -9    0.05    1.21
  -1 -11   9    1.65    0.64
  -1 -11   9    0.67    0.50
   1 -11  -9    1.68    0.48
  -1 -11   8  186.25    4.75
   1  11  -8  190.74    9.54
  -1 -11   8  187.16    5.13
   1  11  -8  176.95    8.98
  -1 -11   8  186.90    5.02
   1 -11  -8  191.62    4.93
   1 -11  -8  183.24    4.76
   1 -11  -8  184.56    4.59
  -1 -11   7    1.42    0.56
   1  11  -7    1.88    1.29
  -1 -11   7    0.90    0.54
   1 -11  -7    1.34    0.58
   1 -11  -7    1.34    0.63
   1  11  -7    0.93    1.18
   1 -11  -7    1.82    0.61
  -1 -11   7    1.26    0.57
  -1 -11   6    0.29    0.51
   1 -11  -6   -0.12    0.44
  -1 -11   6    0.52    0.56
   1 -11  -6    0.27    0.43
   1 -11  -6    0.37    0.53
   1  11  -6    0.25    0.79
  -1 -11   6    0.20    0.46
   1  11  -6   -0.53    0.97
   1  11  -5   88.28    6.22
   1  11  -5   92.92    6.84
  -1 -11   5   91.56    3.32
  -1 -11   5   86.20    3.34
   1 -11  -5   92.82    3.27
   1 -11  -5   87.06    3.03
   1 -11  -5  101.51    3.39
  -1 -11   5   90.42    3.46
  -1 -11   4  180.40    5.07
   1 -11  -4  181.25    4.74
   1  11  -4  175.59    8.78
  -1  11   4  184.73    8.68
   1 -11  -4  176.36    4.79
  -1 -11   4  182.19    4.93
  -1  11   4  175.09    9.48
   1 -11  -4  177.06    4.49
   1  11  -4  173.89    9.40
  -1 -11   4  174.57    4.95
   1  11  -3   78.12    6.26
   1  11  -3   80.17    5.80
  -1  11   3   76.62    5.51
   1 -11  -3   68.96    2.61
   1 -11  -3   74.33    2.88
   1 -11  -3   74.43    2.97
  -1 -11   3   73.97    3.11
  -1  11   3   80.91    6.39
  -1 -11   3   77.66    3.10
  -1 -11   3   72.57    3.03
   1 -11  -2  250.53    6.00
   1 -11  -2  246.28    5.63
   1  11  -2  232.59   11.07
  -1 -11   2  250.05    6.15
   1  11  -2  241.49   11.46
   1  11  -2  267.12   10.55
  -1  11   2  256.46   11.60
  -1 -11   2  246.54    6.01
  -1  11   2  256.47   10.49
  -1 -11   1   78.61    3.20
  -1  11   1   78.58    5.83
   1  11  -1   76.69    6.35
   1  11  -1   74.92    6.11
  -1  11   1   80.64    6.47
  -1 -11   1   79.10    3.18
   1 -11  -1   83.10    3.19
   1 -11  -1   80.11    2.97
   1 -11  -1   83.24    2.93
  -1 -11   0   13.32    1.33
  -1 -11   0   12.59    1.30
   1  11   0   11.87    2.56
   1 -11   0   12.78    1.27
   1 -11   0   13.86    1.17
  -1  11   0   12.92    2.38
   1 -11   0   13.39    1.23
   1 -11   0   13.13    1.32
  -1  11   0   12.06    2.63
   1  11   0   10.31    2.38
  -1 -11  -1   81.51    3.24
  -1 -11  -1   80.26    3.16
   1 -11   1   81.02    3.16
  -1  11  -1   84.61    6.04
   1  11   1   87.60    6.72
   1 -11   1   80.25    2.76
  -1  11  -1   85.10    6.63
   1 -11   1   82.23    3.07
   1  11   1   75.65    6.11
   1 -11   1   81.41    3.19
  -1 -11  -2  247.38    5.95
  -1  11  -2  251.42   11.53
  -1  11  -2  241.49   10.55
   1  11   2  238.13   11.20
   1 -11   2  239.91    5.75
   1 -11   2  244.46    5.97
   1 -11   2  242.56    5.93
   1  11   2  245.17   11.08
  -1 -11  -2  241.40    5.71
   1 -11   3   72.91    2.94
   1 -11   3   72.86    3.02
  -1  11  -3   72.16    5.67
  -1 -11  -3   74.32    2.91
   1  11   3   79.29    6.31
   1 -11   3   78.57    3.09
  -1  11  -3   71.38    6.03
   1  11   3   77.98    6.02
  -1 -11  -3   75.57    3.03
   1 -11   4  181.59    4.94
  -1  11  -4  188.52    9.83
   1 -11   4  185.20    5.09
   1  11   4  189.55    9.41
  -1 -11  -4  182.37    4.51
  -1  11  -4  177.70    9.14
  -1 -11  -4  191.11    5.02
   1  11   4  185.18    9.57
  -1 -11  -4  185.60    4.89
   1 -11   4  186.17    5.00
  -1 -11  -5   93.87    3.32
   1 -11   5   94.94    3.38
  -1 -11  -5   92.13    3.08
   1 -11   5   92.59    3.45
  -1  11  -5   95.85    6.65
   1 -11   5   91.99    3.37
  -1 -11  -5   93.16    3.29
   1  11   5  100.86    6.72
  -1 -11  -6    0.54    0.51
   1 -11   6   -0.04    0.55
   1 -11   6    0.26    0.47
  -1 -11  -6    0.32    0.47
  -1 -11  -6   -0.03    0.46
  -1  11  -6   -0.40    1.06
  -1  11  -6    0.45    0.44
   1 -11   6    0.49    0.44
   1  11   6   -0.23    0.92
  -1  11  -7    2.44    0.57
   1 -11   7    1.86    0.65
   1 -11   7    1.15    0.52
  -1  11  -7    1.23    1.02
  -1  11  -7    1.34    1.46
  -1 -11  -7    2.09    0.63
   1 -11   7    0.98    0.51
  -1 -11  -7    1.18    0.64
  -1 -11  -7    1.81    0.61
  -1 -11  -8  190.53    4.67
   1 -11   8  187.24    4.76
  -1  11  -8  175.02    9.20
  -1 -11  -8  191.34    4.94
   1 -11   8  189.56    5.02
  -1 -11  -8  182.64    4.73
  -1  11  -8  180.22    9.18
   1  11   8  190.10    8.72
   1 -11   8  184.58    5.04
  -1  11  -8  190.84    4.56
  -1 -11  -9    1.73    0.59
   1 -11   9    1.37    0.60
  -1  11  -9    0.32    0.98
  -1  11  -9    0.69    1.28
  -1 -11  -9    1.72    0.59
  -1 -11  -9    2.42    0.63
   1 -11   9    1.25    0.53
  -1  11  -9    1.94    0.54
   1 -11   9    1.56    0.58
   1 -11  10   20.51    1.37
   1 -11  10   19.64    1.50
  -1  11 -10   19.74    2.85
   1 -11  10   18.20    1.45
  -1  11 -10   18.57    1.28
  -1 -11 -10   19.44    1.43
  -1 -11 -10   20.57    1.49
  -1  11 -10   20.08    3.14
  -1 -11 -11   88.09    3.06
   1 -11  11   87.84    3.16
   1 -11  11   88.53    3.18
  -1  11 -11   87.63    6.28
  -1  11 -11   89.00    2.86
  -1 -11 -11   87.67    3.05
   1 -11  12  187.39    4.75
  -1 -11 -12  189.36    4.66
  -1 -11 -12  182.28    4.55
  -1  11 -12  181.24    8.96
   1 -11  12  185.28    4.76
  -1  11 -12  186.54    4.35
  -1  11 -13    2.40    0.59
  -1  11 -13    1.86    1.28
   1 -11  13    2.52    0.62
  -1 -11 -13    1.95    0.58
  -1  11 -13    3.20    0.58
  -1 -11 -13    2.98    0.61
   1 -11  13    2.77    0.64
   1 -11  14   13.08    1.14
  -1  11 -14   15.97    1.08
  -1 -11 -14   13.51    1.06
  -1 -11 -14   12.22    1.06
   1 -11  14   12.00    1.05
  -1  11 -14   14.04    1.17
  -1  11 -15    1.79    0.42
  -1 -11 -15    1.18    0.49
   1 -11  15    1.87    0.48
  -1  11 -15    2.64    0.57
   1 -11  15    1.62    0.51
   1 -11  16   23.11    1.34
  -1 -11 -16   23.28    1.30
   1 -11  16   22.95    1.26
  -1  11 -16   25.10    1.38
  -1  11 -16   22.29    1.16
   1 -11  17   15.33    1.02
  -1  11 -17   15.98    1.04
   1 -11  17   13.56    0.90
  -1  11 -17   14.49    0.88
  -1  11 -17   15.45    0.96
  -1 -11 -17   15.68    1.03
   1 -11  18    2.81    0.46
  -1 -11 -18    1.05    0.33
   1 -11  18    2.12    0.34
  -1  11 -18    2.00    0.36
  -1  11 -18    2.20    0.40
  -1  11 -18    1.30    0.31
  -1  11 -19   10.75    0.67
   1 -11  19   10.67    0.71
  -1 -11 -19   10.71    0.69
   1  12 -17    1.86    0.35
  -1 -12  17    2.28    0.36
   1  12 -17    1.76    0.31
   1  12 -16   29.90    1.25
  -1 -12  16   32.74    1.33
   1  12 -16   31.03    1.25
  -1 -12  15   17.48    1.05
   1 -12 -15   19.35    1.03
   1  12 -15   18.35    1.07
   1  12 -15   17.73    1.03
   1 -12 -14   32.45    1.43
   1  12 -14   30.37    1.48
   1 -12 -14   30.75    1.42
   1  12 -14   30.85    1.45
  -1 -12  14   30.31    1.48
   1 -12 -13    4.11    0.59
   1 -12 -13    5.04    0.66
  -1 -12  13    4.98    0.69
   1  12 -13    5.51    0.68
   1  12 -13    4.10    0.66
  -1 -12  12    4.89    0.70
   1  12 -12    5.01    0.71
   1 -12 -12    4.65    0.65
   1 -12 -12    4.62    0.68
   1  12 -11   23.16    1.43
   1 -12 -11   25.36    1.46
   1 -12 -11   22.66    1.37
  -1 -12  11   23.05    1.47
  -1 -12  10  212.12    4.44
   1 -12 -10  210.29    4.74
   1 -12 -10  202.14    4.62
  -1 -12  10  200.71    4.90
   1  12 -10  207.21    4.81
  -1 -12   9    2.11    0.58
   1 -12  -9    3.35    0.62
   1  12  -9    3.39    0.67
   1 -12  -9    2.37    0.53
   1 -12  -9    2.19    0.54
  -1 -12   9    2.36    0.62
   1  12  -9    2.09    1.08
   1 -12  -8   10.96    0.94
  -1 -12   8    9.60    1.05
  -1 -12   8   11.31    1.02
   1 -12  -8   10.97    1.01
   1  12  -8   10.55    2.11
   1  12  -8   11.80    2.22
   1 -12  -8   10.87    1.06
   1  12  -8   11.99    1.11
   1 -12  -7    0.59    0.45
   1  12  -7   -0.70    0.91
   1  12  -7    0.86    1.04
   1 -12  -7    0.69    0.44
  -1 -12   7    0.77    0.53
   1  12  -7    0.62    0.95
   1 -12  -7    0.20    0.45
  -1 -12   7    0.41    0.43
  -1 -12   6  173.19    4.67
   1  12  -6  174.91    8.65
   1 -12  -6  175.29    4.45
  -1 -12   6  181.95    4.59
   1 -12  -6  165.60    4.16
   1  12  -6  170.14    8.21
   1 -12  -6  176.86    4.40
  -1  12   6  172.82    8.46
   1  12  -6  180.23    9.10
   1 -12  -5    2.08    0.62
   1 -12  -5    3.25    0.66
   1  12  -5    1.93    1.42
   1  12  -5    2.93    1.64
   1 -12  -5    1.38    0.51
  -1 -12   5    2.38    0.66
  -1 -12   5    2.69    0.69
   1  12  -4    4.20    1.67
   1 -12  -4    4.87    0.70
  -1 -12   4    5.53    0.87
   1 -12  -4    3.18    0.72
   1 -12  -4    5.84    0.80
  -1 -12   4    5.67    0.88
   1 -12  -3    4.42    0.74
   1  12  -3    7.29    2.12
  -1 -12   3    3.73    0.71
  -1 -12   3    6.53    0.90
   1 -12  -3    3.80    0.68
   1 -12  -2   30.95    1.68
   1 -12  -2   29.41    1.78
   1  12  -2   25.93    3.62
  -1 -12   2   28.98    1.81
  -1 -12   2   30.09    1.86
   1 -12  -1   -0.13    0.52
   1  12  -1   -1.26    1.32
  -1  12   1   -0.37    0.85
  -1 -12   1    0.45    0.51
  -1 -12   1    0.45    0.46
  -1  12   0   28.46    3.35
   1  12   0   36.62    4.19
  -1 -12   0   35.99    2.03
   1 -12   0   35.12    1.99
   1 -12   1    0.40    0.49
  -1  12  -1    0.56    0.88
  -1 -12  -1    1.48    0.59
   1 -12   1   -0.14    0.38
  -1 -12  -2   33.30    1.92
   1 -12   2   30.26    1.72
  -1  12  -2   30.77    3.61
   1  12   2   27.45    3.56
   1 -12   2   34.14    1.98
   1 -12   3    4.45    0.81
   1 -12   3    4.53    0.83
  -1  12  -3    4.21    1.48
   1 -12   3    5.58    0.80
  -1 -12  -3    3.77    0.78
  -1  12  -3    3.94    1.42
  -1  12  -4    5.48    1.93
   1 -12   4    4.84    0.81
  -1 -12  -4    5.74    0.81
  -1  12  -4    3.48    1.52
   1  12   4    3.97    1.61
   1 -12   4    4.69    0.76
   1 -12   4    6.06    0.90
   1 -12   5    2.27    0.60
  -1  12  -5    1.89    1.13
  -1  12  -5    1.23    1.03
   1  12   5    1.23    1.31
   1 -12   5    2.16    0.60
   1 -12   5    3.12    0.71
   1  12   5    2.31    1.36
  -1 -12  -5    2.88    0.69
  -1 -12  -5    1.91    0.52
   1 -12   6  171.19    4.43
   1  12   6  184.93    8.63
  -1 -12  -6  161.10    4.04
  -1  12  -6  180.82    9.02
  -1 -12  -6  174.63    4.39
   1 -12   6  174.65    4.48
  -1  12  -6  180.18    8.74
   1 -12   6  170.73    4.61
   1 -12   7    0.82    0.53
  -1  12  -7    0.55    1.19
   1 -12   7    0.90    0.52
  -1  12  -7   -0.29    1.01
  -1 -12  -7    0.70    0.41
  -1 -12  -7    0.12    0.39
   1 -12   7    0.42    0.43
  -1  12  -8   10.04    2.19
   1 -12   8   11.21    1.11
  -1 -12  -8   10.05    0.94
  -1 -12  -8    9.94    0.94
   1 -12   8    9.13    0.97
   1 -12   8   10.10    0.98
  -1 -12  -9    3.13    0.61
  -1  12  -9    1.12    0.85
   1 -12   9    2.69    0.56
  -1 -12  -9    2.75    0.58
   1 -12   9    2.20    0.52
   1 -12   9    2.35    0.61
   1 -12  10  206.95    4.36
  -1  12 -10  197.34    8.86
   1 -12  10  201.82    4.80
   1 -12  10  199.70    4.67
  -1 -12 -10  198.87    4.53
  -1  12 -11   26.35    1.54
  -1  12 -11   26.34    1.28
   1 -12  11   24.00    1.44
   1 -12  11   25.90    1.53
  -1 -12 -11   26.49    1.47
  -1 -12 -12    4.82    0.67
   1 -12  12    5.12    0.70
   1 -12  12    4.93    0.69
  -1  12 -12    5.19    0.72
  -1  12 -12    6.13    0.63
   1 -12  13    4.36    0.62
  -1  12 -13    4.66    0.53
  -1  12 -13    3.80    0.61
   1 -12  13    3.91    0.57
  -1 -12 -13    4.21    0.59
  -1 -12 -14   28.32    1.35
   1 -12  14   28.77    1.37
   1 -12  14   26.40    1.33
  -1  12 -14   28.74    1.41
  -1  12 -15   18.60    1.06
   1 -12  15   17.20    0.97
   1 -12  15   17.22    0.99
  -1 -12 -15   17.37    1.00
  -1  12 -15   17.10    0.99
  -1 -12 -16   31.94    1.26
   1 -12  16   31.00    1.23
  -1  12 -16   32.02    1.28
  -1  12 -16   31.15    1.20
  -1  12 -17    2.43    0.33
  -1 -12 -17    2.24    0.36
   1 -12  17    2.02    0.32
  -1 -13  14    0.45    0.25
   1  13 -14    0.65    0.26
   1  13 -14    0.82    0.26
  -1 -13  13    1.26    0.34
   1  13 -13    2.07    0.38
   1  13 -13    1.58    0.37
   1  13 -12   15.50    0.96
  -1 -13  12   17.01    0.98
   1  13 -12   15.90    0.94
   1  13 -11    5.15    0.61
   1  13 -11    4.51    0.58
  -1 -13  11    4.76    0.58
  -1 -13  10    3.51    0.56
   1  13 -10    3.18    0.51
  -1 -13   9   35.08    1.42
   1  13  -9   35.39    1.56
  -1 -13   9   33.38    1.58
   1  13  -8   15.59    1.06
   1 -13  -8   15.14    0.93
  -1 -13   8   15.81    1.03
  -1 -13   8   15.61    1.11
   1  13  -7    5.90    0.69
   1 -13  -7    5.10    0.64
  -1 -13   7    5.47    0.70
  -1 -13   7    4.64    0.67
   1 -13  -6    0.49    0.44
  -1 -13   6    1.28    0.45
  -1 -13   6    0.38    0.40
   1  13  -6    0.64    0.36
   1  13  -5   63.55    2.25
   1 -13  -5   67.90    2.36
  -1 -13   5   71.23    2.48
  -1 -13   5   67.74    2.48
  -1 -13   4   13.20    1.08
  -1 -13   4   12.93    1.10
   1 -13  -4   13.75    1.09
  -1 -13   3   93.63    3.03
   1 -13  -3   92.29    2.94
   1 -13  -2    0.90    0.52
  -1 -13   2    1.16    0.56
   1 -13  -1    8.14    0.92
  -1 -13   1    8.91    0.96
   1 -13   0   -0.23    0.41
  -1 -13   0    0.78    0.54
  -1 -13  -1   11.26    1.10
   1 -13   1    9.40    1.02
   1 -13   2    0.73    0.47
  -1 -13  -2    1.83    0.55
  -1 -13  -3   94.84    3.00
   1 -13   3   94.59    3.02
   1 -13   4   10.49    0.99
  -1 -13  -4   10.99    0.98
  -1 -13  -5   66.56    2.35
   1 -13   5   66.71    2.25
   1 -13   5   70.54    2.46
   1 -13   6    0.13    0.40
  -1 -13  -6    0.60    0.41
   1 -13   6    0.16    0.34
  -1 -13  -7    5.43    0.64
  -1 -13  -7    4.36    0.54
   1 -13   7    4.48    0.62
   1 -13   7    5.52    0.65
   1 -13   8   16.45    1.04
  -1 -13  -8   15.36    0.97
   1 -13   8   16.81    1.06
  -1 -13  -8   16.65    0.97
  -1  13  -9   33.29    1.56
  -1 -13  -9   31.17    1.33
   1 -13   9   32.43    1.44
   1 -13   9   35.20    1.42
  -1  13 -10    3.34    0.53
   1 -13  10    3.15    0.44
   1 -13  10    3.11    0.48
  -1 -13 -10    2.65    0.42
   1 -13  11    5.08    0.54
  -1 -13 -11    4.38    0.51
  -1  13 -11    5.61    0.63
  -1 -13 -12   16.57    0.87
   1 -13  12   16.42    0.89
  -1  13 -12   17.83    1.01
   1 -13  13    1.67    0.31
  -1  13 -13    2.04    0.39
  -1 -13 -13    1.48    0.35
  -1  13 -13    1.38    0.35
  -1  13 -14    0.54    0.26
  -1  13 -14    0.96    0.30
   1  14 -10   10.05    0.62
   1  14  -9    0.24    0.22
   1  14  -8    0.08    0.21
   1  14  -8    0.89    0.31
  -1 -14   7   19.41    0.92
   1  14  -7   19.20    0.95
   1  14  -7   18.58    0.85
   1  14  -6   19.83    0.90
   1  14  -6   19.30    0.97
   1 -14  -6   19.37    0.93
  -1 -14   6   20.52    1.02
   1 -14  -5   66.18    1.91
   1  14  -5   63.50    1.71
   1  14  -5   66.68    1.88
  -1 -14   5   70.14    2.05
   1  14  -4    1.12    0.33
   1 -14  -4    0.69    0.33
  -1 -14   4    0.84    0.38
   1 -14  -3   37.78    1.52
  -1 -14   3   38.81    1.58
   1  14  -3   36.41    1.30
   1 -14  -2   12.62    0.91
  -1 -14   2   12.90    0.94
  -1 -14   1   20.33    1.17
   1 -14  -1   18.77    1.11
   1 -14   0    5.24    0.64
  -1 -14   0    5.12    0.64
  -1 -14  -1   20.05    1.16
   1 -14   1   18.22    1.11
  -1 -14  -2   12.10    0.90
   1 -14   2   13.87    0.96
  -1 -14  -3   39.97    1.59
   1 -14   3   40.00    1.60
   1 -14   4    0.77    0.32
  -1 -14  -4    0.76    0.33
   1 -14   5   69.90    2.04
  -1 -14  -5   66.57    1.93
  -1  14  -5   67.91    1.98
   1 -14   6   19.19    0.99
  -1  14  -6   19.51    1.01
  -1 -14  -6   18.32    0.92
  -1  14  -7   18.57    0.96
   1 -14   7   18.73    0.91
  -1  14  -8   -0.03    0.24
  -1  14  -9    0.35    0.25
  -1  14 -10   11.32    0.62
  -1  14 -10    9.54    0.61
  -2   0  29    0.04    0.21
  -2   0  29   -0.32    0.26
   2   0 -29    0.12    0.22
  -2   0  28    0.43    0.31
  -2   0  28    0.36    0.30
   2   0 -28    0.85    0.36
  -2   0  28    0.48    0.27
  -2   0  27   -0.42    0.34
  -2   0  27   -0.40    0.35
   2   0 -27    0.31    0.37
  -2   0  27    0.10    0.36
  -2   0  26   23.97    1.43
  -2   0  26   21.79    1.30
   2   0 -26   22.20    1.39
  -2   0  25    0.12    0.37
   2   0 -25   -0.54    0.45
   2   0 -25    0.29    0.38
  -2   0  25    0.99    0.53
   2   0 -24    4.41    0.66
  -2   0  24    4.30    0.79
  -2   0  24    5.44    0.79
   2   0 -24    5.94    0.86
  -2   0  23   -0.11    1.16
   2   0 -23   -0.27    0.41
  -2   0  23    0.35    0.91
   2   0 -23   -0.22    0.48
  -2   0  23   -0.17    0.41
   2   0 -22  131.91    3.81
   2   0 -22  137.39    4.29
   2   0 -22  135.21    3.88
  -2   0  22  134.79    4.07
  -2   0  22  136.52    8.21
  -2   0  22  128.65    7.40
   2   0 -21    0.09    0.48
   2   0 -21    0.53    0.44
   2   0 -21    0.51    0.48
  -2   0  21   -0.30    0.50
  -2   0  21    1.96    1.23
  -2   0  21    0.38    0.99
   2   0 -20   22.48    1.57
   2   0 -20   22.63    1.58
   2   0 -20   23.42    1.69
  -2   0  20   23.92    3.53
  -2   0  20   22.52    1.65
  -2   0  20   19.72    3.11
   2   0 -19   -0.80    1.16
   2   0 -19    0.17    0.48
  -2   0  19    0.63    0.96
  -2   0  19    0.08    1.01
  -2   0  19   -1.43    1.24
  -2   0  19   -0.02    0.44
   2   0 -19    0.85    0.50
   2   0 -19   -0.20    0.49
   2   0 -18   24.13    1.70
   2   0 -18   26.55    1.67
   2   0 -18   27.24    1.67
  -2   0  18   28.06    3.40
   2   0 -18   25.17    3.36
  -2   0  18   28.90    3.72
   2   0 -18   28.99    1.83
  -2   0  18   28.60    3.42
   2   0 -17    0.11    0.55
  -2   0  17   -0.17    0.86
   2   0 -17    0.35    1.08
  -2   0  17    0.50    0.99
  -2   0  17    0.61    1.04
   2   0 -17    2.08    0.70
   2   0 -16   91.46    5.88
  -2   0  16   89.03    5.60
  -2   0  16   84.93    5.43
  -2   0  16   78.81    5.49
   2   0 -15    1.47    1.02
  -2   0  15    0.75    0.90
  -2   0  15    0.76    0.99
  -2   0  15    1.38    0.97
  -2   0  14   11.30    1.93
  -2   0  14    7.78    1.61
   2   0 -14    7.88    1.70
  -2   0  14    8.97    1.81
  -2   0  13   -0.05    0.55
  -2   0  13    1.17    0.96
  -2   0  13    0.20    0.86
   2   0 -13   -0.05    0.68
  -2   0  13    0.20    0.77
   2   0 -12   93.97    4.99
  -2   0  12  101.63    4.99
  -2   0  12   94.27    4.87
  -2   0  12   98.69    5.23
  -2   0  12   97.04    5.00
   2   0 -11    0.29    0.68
  -2   0  11    0.25    0.70
  -2   0  11    0.99    0.70
  -2   0  11    1.23    0.91
  -2   0  11    0.50    0.68
  -2   0  11   -0.54    0.73
   2   0 -10  622.11   11.31
   2   0 -10  615.39   13.14
  -2   0  10  604.37   12.84
  -2   0  10  626.41   13.07
  -2   0  10  598.93   12.94
  -2   0  10  632.43   13.57
  -2   0   9    0.65    0.80
  -2   0   9    0.84    0.79
  -2   0   9    0.66    0.74
  -2   0   9   -0.07    0.42
  -2   0   9    0.57    0.76
   2   0  -9    1.45    0.90
  -2   0   8   61.12    2.96
  -2   0   8   88.81    4.26
   2   0  -8   67.64    2.87
  -2   0   8   85.75    4.08
  -2   0   8   71.39    3.84
  -2   0   8   60.84    3.51
   2   0  -7    0.58    0.60
  -2   0   7   -0.10    1.46
  -2   0   7    1.61    1.31
  -2   0   7    2.49    1.21
   2   0  -7    0.95    0.71
  -2   0   7    1.63    0.79
  -2   0   7    0.26    0.58
   2   0  -6 1045.85   16.59
  -2   0   6 1075.96   15.77
   2   0  -6 1030.18   14.33
  -2   0   6 1058.81   16.63
   2   0  -6 1051.37   13.90
  -2   0   6 1041.01   16.52
   2   0  -5    0.21    0.51
  -2   0   5    0.21    0.45
   2   0  -5    0.37    0.26
   2   0  -4   92.48    2.10
  -2   0   4   92.89    3.00
   2   0  -4   91.12    3.12
  -2   0   3   -0.27    0.41
   2   0  -3   -0.36    0.24
   2   0  -3    0.62    0.42
  -2   0   2   13.93    1.09
   2   0  -2   13.31    1.03
   2   0  -1    0.03    0.33
   2   0  -1    0.06    0.15
  -2   0   1    0.41    0.45
   2   0   0 4993.72   61.31
   2   0   0 5064.55   60.09
  -2   0   0 5106.07   61.49
  -2   0  -1   -0.11    0.36
   2   0   1   -0.20    0.36
  -2   0  -1   -0.11    0.25
   2   0   1   -0.11    0.37
  -2   0  -2   15.51    1.03
   2   0   2   13.15    1.08
   2   0   3    0.21    0.52
  -2   0  -3   -0.17    0.34
  -2   0  -4  100.80    2.70
   2   0   4  101.80    3.29
  -2   0  -5    0.23    0.35
   2   0   5    0.10    0.49
  -2   0  -5    0.26    0.27
  -2   0  -5   -0.30    0.49
  -2   0  -6 1087.79   14.99
   2   0   6 1106.30   17.22
   2   0   6 1078.84   16.78
  -2   0  -6 1113.03   14.94
   2   0   6 1131.93   17.39
  -2   0  -6 1098.38   17.18
   2   0   6 1118.39   17.09
  -2   0  -7    0.00    0.29
   2   0   7    0.31    0.66
  -2   0  -7   -0.13    0.55
  -2   0  -7   -0.07    0.25
   2   0   7    0.16    0.51
  -2   0  -7    0.57    0.70
   2   0   7    0.33    0.72
   2   0   8   50.44    2.89
  -2   0  -8   46.83    2.86
   2   0   8   49.51    2.98
   2   0   8   50.85    2.95
  -2   0  -8   52.44    3.03
   2   0   8   53.27    3.06
  -2   0  -8   53.48    1.97
  -2   0  -8   49.94    1.71
  -2   0  -9    0.39    0.29
   2   0   9    0.36    0.63
   2   0   9    0.27    0.66
   2   0   9   -0.05    0.55
  -2   0  -9    0.03    0.53
  -2   0  -9   -0.18    0.56
   2   0   9    0.67    0.67
  -2   0 -10  603.67   12.92
  -2   0 -10  575.43   12.72
   2   0  10  590.32   12.60
   2   0  10  616.28   13.09
   2   0  10  586.67   12.86
   2   0  10  591.82   12.76
   2   0  11   -0.25    0.63
   2   0  11    0.03    0.63
   2   0  11    0.78    0.77
  -2   0 -11    0.47    0.70
   2   0  11    0.06    0.60
  -2   0 -11    0.34    0.77
   2   0  11    0.15    0.59
   2   0  12  104.41    5.18
  -2   0 -12  103.84    5.25
  -2   0 -12  106.69    5.28
   2   0  12   99.69    5.08
   2   0  12  103.66    5.23
   2   0  12  102.93    5.15
   2   0  12  105.73    5.19
  -2   0 -13    0.22    0.71
   2   0  13   -0.69    0.88
   2   0  13    0.13    0.60
   2   0  13   -0.18    0.66
   2   0  13    0.66    0.87
  -2   0 -13    0.19    0.80
  -2   0 -14   10.11    1.80
   2   0  14    8.27    1.71
   2   0  14    8.41    1.68
   2   0  14    7.38    1.57
   2   0  14    8.03    1.65
  -2   0 -14    6.84    1.56
   2   0  15    0.70    1.01
  -2   0 -15   -0.70    0.83
   2   0  15   -0.15    0.88
  -2   0 -15    0.21    0.79
   2   0  15    0.08    0.92
   2   0  15    0.60    0.79
   2   0  16   85.59    5.60
  -2   0 -16   84.01    5.54
  -2   0 -16   84.50    5.60
   2   0  16   78.44    5.41
  -2   0 -17   -0.23    1.03
  -2   0 -17    0.19    0.40
  -2   0 -17    0.09    0.47
   2   0  17   -0.04    0.87
  -2   0 -17   -0.20    0.92
   2   0  17    0.34    0.80
  -2   0 -18   31.51    1.80
  -2   0 -18   33.87    1.90
  -2   0 -18   36.11    3.89
   2   0  18   28.98    3.51
   2   0  18   34.86    3.86
  -2   0 -18   28.74    1.74
  -2   0 -18   31.85    3.72
  -2   0 -18   29.76    1.76
  -2   0 -19   -0.23    0.45
  -2   0 -19   -0.47    0.98
  -2   0 -19   -0.42    1.00
   2   0  19   -0.04    0.41
   2   0  19   -0.36    0.82
   2   0  19    0.59    1.07
  -2   0 -19    0.44    0.49
  -2   0 -19    0.37    0.48
  -2   0 -19    0.28    0.43
   2   0  20   25.84    3.39
  -2   0 -20   23.63    1.64
   2   0  20   23.34    1.59
  -2   0 -20   24.81    1.66
  -2   0 -20   25.99    1.69
  -2   0 -20   25.62    1.74
  -2   0 -21    0.44    0.54
   2   0  21    0.57    0.55
   2   0  21    0.19    0.91
  -2   0 -21   -0.06    0.44
  -2   0 -21   -0.29    0.49
  -2   0 -21    0.32    0.53
   2   0  22  138.19    3.98
   2   0  22  140.43    4.21
  -2   0 -22  137.51    4.06
   2   0  22  144.89    7.80
  -2   0 -22  138.24    4.04
  -2   0 -22  137.60    4.07
   2   0  23    0.33    0.70
   2   0  23   -1.12    1.08
  -2   0 -23    0.58    0.51
   2   0  23    0.03    0.44
  -2   0 -23    0.16    0.41
  -2   0 -23    0.23    0.48
  -2   0 -24    6.72    0.90
   2   0  24    5.91    0.85
  -2   0 -24    5.26    0.79
  -2   0 -24    5.90    0.80
   2   0  24    4.87    0.73
   2   0  25    0.01    0.33
   2   0  25    0.32    0.47
   2   0  25   -0.09    0.38
  -2   0 -25    0.73    0.47
  -2   0 -25   -0.10    0.36
  -2   0 -26   19.38    1.17
   2   0  26   21.08    1.30
  -2   0 -26   22.43    1.36
   2   0  26   21.21    1.38
   2   0  27    0.50    0.38
   2   0  27   -0.20    0.31
  -2   0 -27   -0.01    0.29
  -2   0 -27    0.27    0.34
   2   0  27   -0.33    0.33
   2   0  28    0.55    0.28
   2   0  28    0.58    0.32
  -2   0 -28   -0.22    0.26
   2   0  29    0.12    0.22
  -2  -1  29    1.24    0.28
  -2   1  29    1.18    0.28
  -2   1  29    1.06    0.31
  -2  -1  29    0.72    0.27
   2   1 -29    1.09    0.27
  -2   1  28    5.05    0.58
   2   1 -28    5.77    0.61
  -2  -1  28    4.84    0.58
   2  -1 -28    5.93    0.60
  -2  -1  28    4.71    0.45
  -2   1  28    4.02    0.59
  -2  -1  28    5.91    0.61
   2  -1 -27    0.52    0.35
   2  -1 -27    0.31    0.29
   2   1 -27    0.34    0.35
  -2  -1  27    0.57    0.30
  -2  -1  27    0.19    0.33
  -2   1  27    0.24    0.37
  -2   1  27    0.57    0.32
  -2  -1  27   -0.63    0.38
  -2   1  26   15.31    1.14
   2  -1 -26   14.82    1.01
  -2   1  26   15.13    1.06
   2  -1 -26   14.81    1.15
   2   1 -26   16.41    1.24
  -2  -1  26   15.98    1.13
  -2  -1  26   16.09    1.21
  -2   1  25    3.09    0.59
   2   1 -25    2.91    0.70
   2  -1 -25    3.51    0.61
   2  -1 -25    3.17    0.69
  -2  -1  25    5.30    0.82
  -2   1  25    2.92    0.65
  -2  -1  25    4.47    0.76
   2   1 -24   19.53    1.51
  -2  -1  24   19.94    1.47
  -2   1  24   17.77    2.80
   2  -1 -24   15.95    1.22
  -2   1  24   20.09    3.11
  -2  -1  24   22.37    1.60
  -2   1  24   17.23    1.28
   2  -1 -24   17.32    1.39
  -2   1  23   11.92    2.28
   2   1 -23   11.07    1.21
   2  -1 -23   12.11    1.14
  -2  -1  23   13.67    1.27
   2   1 -23   12.10    1.11
  -2  -1  23   11.87    1.24
  -2   1  23   12.32    1.16
  -2   1  23   11.84    2.55
   2  -1 -23   14.12    1.33
   2   1 -22   38.21    2.15
   2  -1 -22   35.80    2.08
  -2  -1  22   33.94    2.09
   2  -1 -22   36.28    1.95
  -2   1  22   34.53    3.96
  -2   1  22   33.48    4.03
  -2   1  22   37.21    1.98
   2   1 -22   33.52    1.87
  -2  -1  22   33.52    2.01
  -2   1  21   20.34    3.19
  -2   1  21   18.55    3.12
   2   1 -21   22.03    1.58
  -2  -1  21   22.49    1.66
   2   1 -21   22.63    1.70
  -2  -1  21   23.15    3.08
   2  -1 -21   23.28    1.60
  -2  -1  21   21.15    3.43
  -2   1  21   22.99    1.56
   2  -1 -21   23.00    1.73
  -2  -1  20    3.03    0.63
   2  -1 -20    4.27    0.75
  -2  -1  20    4.68    1.62
   2   1 -20    3.66    0.89
  -2  -1  20    4.14    1.62
   2  -1 -20    3.15    0.71
  -2   1  20    2.41    1.38
   2  -1 -20    3.86    0.67
  -2  -1  20    3.50    0.76
  -2   1  20    2.85    0.66
  -2   1  20    3.40    1.62
   2   1 -20    3.02    0.80
   2   1 -20    3.06    0.88
   2  -1 -19   19.10    3.07
   2  -1 -19   17.40    1.39
  -2   1  19   18.12    2.96
  -2  -1  19   18.94    2.81
   2   1 -19   18.04    1.45
   2   1 -19   17.68    1.49
   2   1 -19   17.64    2.85
  -2   1  19   21.24    3.17
  -2  -1  19   20.49    1.56
  -2  -1  19   15.70    2.75
   2  -1 -19   18.59    1.52
  -2  -1  19   20.83    3.10
   2  -1 -19   18.85    1.49
  -2   1  19   18.19    2.86
   2   1 -19   18.67    1.49
  -2  -1  18   10.38    2.20
  -2   1  18   12.30    2.46
  -2   1  18   11.56    2.24
   2  -1 -18   11.19    1.14
   2   1 -18   12.37    1.28
   2  -1 -18   12.15    1.21
   2   1 -18   10.54    2.21
   2   1 -18   11.44    1.23
   2  -1 -18   14.17    2.61
  -2   1  18   14.46    2.55
  -2  -1  18   13.80    2.38
  -2  -1  18   11.57    1.14
   2   1 -18   10.37    1.11
   2  -1 -18   11.55    1.13
   2   1 -17   11.82    1.18
   2   1 -17   12.67    2.35
  -2  -1  17   12.03    2.41
  -2   1  17   10.34    2.15
  -2   1  17   11.54    2.22
  -2   1  17   11.97    2.40
   2  -1 -17   11.79    1.12
  -2  -1  17   11.76    2.30
   2  -1 -17   11.72    1.18
   2   1 -17    9.79    1.06
  -2  -1  17   12.77    1.19
   2   1 -17   11.74    1.16
  -2  -1  17    9.71    1.96
   2  -1 -17   13.67    2.49
  -2  -1  16   35.17    3.48
   2   1 -16   37.89    3.76
   2  -1 -16   35.85    3.74
  -2  -1  16   35.57    3.75
  -2   1  16   37.47    3.77
  -2   1  16   35.76    3.57
  -2   1  16   34.68    3.74
  -2  -1  16   36.05    3.46
  -2   1  16   36.16    3.66
   2   1 -15    1.34    0.82
  -2   1  15    1.88    1.15
  -2  -1  15    2.27    1.01
  -2   1  15    2.64    1.19
  -2  -1  15    1.06    0.97
   2  -1 -15    1.60    1.10
  -2  -1  15    1.51    0.86
  -2   1  15    2.45    1.05
  -2   1  15    0.67    0.81
  -2   1  15    1.47    1.01
  -2  -1  14   16.77    2.30
  -2  -1  14   21.23    2.79
  -2   1  14   19.65    2.61
  -2   1  14   20.68    2.69
  -2  -1  14   21.08    2.51
  -2   1  14   19.25    2.46
  -2   1  14   20.36    2.50
  -2   1  14   19.82    2.49
   2   1 -14   18.91    2.42
   2  -1 -14   19.07    2.48
  -2  -1  13   11.96    1.81
   2  -1 -13   13.90    2.06
  -2   1  13   14.53    2.06
   2   1 -13   14.84    2.06
  -2  -1  13   13.20    1.97
  -2   1  13   12.83    1.95
  -2   1  13   13.38    2.04
  -2   1  13   15.50    2.24
  -2  -1  13   11.49    1.95
  -2   1  13   13.85    1.96
  -2   1  12  404.96   10.92
  -2  -1  12  419.95   10.93
  -2  -1  12  417.39   11.56
  -2   1  12  417.54   11.24
   2  -1 -12  427.65   11.47
  -2   1  12  416.44   11.12
   2   1 -12  427.78   11.31
  -2   1  12  413.81   11.19
  -2  -1  12  414.75   10.84
  -2   1  11   67.32    3.89
  -2  -1  11   63.46    4.06
   2   1 -11   68.47    3.30
  -2   1  11   63.56    3.94
  -2  -1  11   68.53    3.86
  -2  -1  11   69.74    3.90
   2   1 -11   69.08    4.01
   2  -1 -11   65.94    3.99
  -2   1  11   66.46    4.01
  -2   1  11   61.18    3.75
   2   1 -10   91.92    3.69
  -2  -1  10   91.89    4.28
  -2   1  10   89.45    4.41
   2   1 -10   93.53    4.47
   2  -1 -10   94.83    4.55
  -2   1  10   98.03    3.34
  -2  -1  10   94.05    4.70
  -2  -1  10   92.84    4.28
  -2   1  10   95.86    4.57
  -2   1  10   91.29    4.27
  -2  -1   9   29.81    2.33
  -2  -1   9   30.74    2.57
   2   1  -9   32.95    2.05
   2  -1  -9   31.56    2.52
  -2   1   9   28.88    2.42
   2   1  -9   28.62    2.36
   2  -1  -9   31.72    1.91
   2  -1  -9   34.22    2.07
  -2   1   9   31.40    2.35
  -2   1   9   32.10    1.87
  -2   1   9   30.08    2.45
  -2  -1   9   29.44    2.26
   2  -1  -8   76.76    2.87
  -2   1   8   80.32    3.21
  -2  -1   8   78.58    3.85
   2   1  -8   78.20    3.08
   2   1  -8   79.77    3.67
  -2   1   8   77.04    3.70
   2  -1  -8   77.97    3.70
  -2  -1   8   76.53    3.55
  -2   1   8   82.56    2.99
  -2   1   8   76.13    3.66
  -2   1   8   76.26    3.44
  -2  -1   7   45.16    2.39
   2  -1  -7   42.79    2.01
  -2  -1   7   40.89    2.60
  -2   1   7   45.51    2.68
  -2   1   7   44.38    2.67
  -2   1   7   43.25    2.39
  -2  -1   7   42.21    2.49
   2   1  -7   44.93    2.55
  -2   1   7   42.12    2.10
   2  -1  -7   39.47    2.51
   2  -1  -6   84.00    2.70
  -2  -1   6   83.11    3.32
  -2   1   6   83.70    2.90
  -2   1   6   83.87    3.50
  -2  -1   6   78.24    3.12
   2   1  -6   88.00    3.39
   2  -1  -6   81.79    3.35
  -2   1   6   80.68    3.40
  -2   1   5   27.28    1.60
  -2  -1   5   30.55    1.84
   2  -1  -5   24.97    1.75
   2   1  -5   27.62    1.81
   2  -1  -5   27.42    1.44
  -2  -1   4   96.66    2.96
   2  -1  -4   88.70    3.13
   2   1  -4   92.70    2.73
  -2   1   4   90.67    2.97
  -2  -1   4   97.69    3.25
   2  -1  -4   94.67    2.70
   2   1  -3    3.14    0.69
   2   1  -3    3.02    0.54
   2  -1  -3    2.64    0.50
  -2   1   3    3.98    0.65
  -2   1   3    3.45    0.73
  -2  -1   3    3.11    0.70
   2  -1  -3    2.76    0.58
  -2   1   3    2.42    0.22
  -2  -1   2  164.20    4.14
  -2   1   2  170.73    4.05
  -2   1   2  166.64    4.02
   2   1  -2  158.15    4.04
   2  -1  -2  159.36    3.40
   2   1  -1   35.79    1.80
   2  -1  -1   38.07    1.41
  -2  -1   1   38.89    1.82
  -2   1   1   38.62    1.80
  -2   1   0    1.49    0.50
   2   1   0    2.23    0.47
  -2  -1   0    2.06    0.53
   2   1   0    1.38    0.53
   2  -1   0    2.16    0.42
   2   1   1   35.53    1.64
  -2  -1  -1   38.89    1.70
   2  -1   1   35.70    1.83
  -2   1  -1   41.48    1.82
   2  -1   1   41.43    1.55
  -2   1  -1   40.51    1.78
   2   1   1   39.11    1.88
  -2   1  -2  156.77    3.84
   2   1   2  148.86    3.93
  -2   1  -2  153.42    3.81
   2   1   2  147.28    3.58
  -2  -1  -2  151.00    3.55
   2  -1   2  143.11    3.94
   2   1   2  144.97    3.71
  -2   1  -3    4.21    0.68
   2  -1   3    3.26    0.67
   2  -1   3    4.39    0.58
   2   1   3    4.15    0.66
  -2  -1  -3    3.23    0.54
   2   1   3    3.36    0.67
   2  -1   4   99.06    3.37
  -2  -1  -4   98.01    2.57
  -2   1  -4  101.15    3.04
   2  -1   4  103.39    2.89
   2   1   4  102.44    3.20
  -2  -1  -4   99.85    2.94
  -2  -1  -5   27.00    1.52
   2   1   5   28.91    1.78
   2  -1   5   27.06    1.85
   2   1   5   25.79    1.77
  -2  -1  -5   26.72    1.17
  -2   1  -5   26.81    1.66
   2  -1   5   28.69    1.64
  -2  -1  -5   26.76    1.86
  -2   1  -5   21.43    0.70
  -2   1  -5   26.32    1.51
   2  -1   6   69.13    3.07
   2  -1   6   68.56    2.84
   2   1   6   72.41    3.09
  -2  -1  -6   67.86    3.15
  -2  -1  -6   68.98    1.86
   2   1   6   76.70    3.13
  -2   1  -6   71.89    2.59
  -2   1  -6   71.70    2.99
   2  -1   6   78.71    3.26
   2   1   6   75.48    3.23
  -2  -1  -6   71.91    2.63
  -2  -1  -7   35.03    2.41
  -2   1  -7   35.97    2.40
  -2  -1  -7   38.61    1.93
  -2   1  -7   32.01    1.16
  -2   1  -7   36.02    2.25
   2  -1   7   38.44    2.44
   2  -1   7   35.60    2.18
  -2   1  -7   38.12    1.86
  -2  -1  -7   31.43    1.02
   2   1   7   40.51    2.41
   2  -1   7   37.70    2.44
   2   1   7   37.17    2.32
   2  -1   7   36.91    2.30
  -2  -1  -7   36.54    2.36
   2   1   8   86.96    3.79
   2  -1   8   84.04    3.90
   2  -1   8   83.96    3.81
  -2   1  -8   80.98    3.79
   2  -1   8   80.58    3.55
   2  -1   8   83.25    3.80
  -2  -1  -8   81.44    3.81
  -2   1  -8   79.31    3.58
  -2   1  -8   78.18    2.77
  -2  -1  -8   79.98    3.81
   2   1   8   79.89    3.55
  -2  -1  -8   83.78    3.02
   2  -1   8   86.78    3.78
  -2   1  -9   33.70    2.49
  -2  -1  -9   36.05    2.01
  -2  -1  -9   33.25    2.60
  -2  -1  -9   32.65    2.57
   2  -1   9   37.69    2.70
   2  -1   9   34.90    2.62
  -2   1  -9   32.55    2.55
   2   1   9   34.77    2.53
  -2   1  -9   37.14    1.84
   2   1   9   35.72    2.43
   2  -1   9   38.53    2.72
   2   1   9   33.02    2.48
   2  -1   9   35.09    2.57
   2   1  10   86.80    4.25
   2  -1  10   92.21    4.48
   2  -1  10   91.76    4.48
  -2   1 -10   84.22    4.16
   2   1  10   85.56    4.31
  -2   1 -10   89.18    4.39
   2   1  10   91.83    4.04
  -2   1 -10   85.76    2.90
  -2  -1 -10   88.75    4.36
   2   1  10   88.75    4.45
   2   1  10   85.26    4.26
  -2  -1 -10   87.13    3.34
  -2  -1 -10   85.29    4.35
   2  -1  10   90.00    4.39
   2  -1  10   91.17    4.41
   2  -1  11   71.78    4.15
   2   1  11   70.72    4.14
  -2  -1 -11   75.60    4.18
  -2  -1 -11   78.66    4.38
   2  -1  11   75.94    4.20
   2   1  11   72.75    4.11
  -2   1 -11   74.26    4.07
   2   1  11   69.41    4.04
   2   1  11   71.52    4.04
   2  -1  11   74.27    4.21
  -2   1 -11   76.12    3.77
   2  -1  11   73.71    4.14
  -2   1 -11   74.01    4.21
  -2   1 -12  412.84   11.16
  -2  -1 -12  404.05   11.25
   2   1  12  405.86   10.93
   2  -1  12  416.11   11.15
   2   1  12  398.77   10.90
   2   1  12  403.58   11.03
   2   1  12  398.48   11.10
  -2  -1 -12  413.17   11.13
   2  -1  12  400.01   11.02
  -2   1 -12  404.69   10.83
   2  -1  12  414.15   11.06
   2   1  13   13.96    2.03
   2   1  13   11.14    1.84
   2  -1  13   15.56    2.15
  -2   1 -13   12.35    1.91
  -2   1 -13   15.33    2.14
   2   1  13   11.07    1.90
  -2  -1 -13   12.88    2.03
   2   1  13   14.72    2.13
  -2  -1 -13   13.27    1.97
   2  -1  13   12.81    2.01
   2  -1  13   14.21    2.05
   2   1  13   12.73    1.94
   2   1  14   18.00    2.35
   2   1  14   18.03    2.43
   2  -1  14   19.05    2.09
   2   1  14   20.54    2.60
  -2  -1 -14   18.88    2.47
  -2  -1 -14   17.76    2.41
   2  -1  14   18.81    2.48
   2   1  14   18.31    2.46
  -2   1 -14   16.60    2.28
   2   1  14   19.67    2.45
  -2   1 -14   17.76    2.39
   2  -1  14   19.20    2.51
   2   1  15    0.90    0.76
   2   1  15    1.68    0.87
   2   1  15    1.66    0.96
  -2   1 -15    1.17    0.85
   2  -1  15    3.55    1.14
  -2  -1 -15    1.99    1.02
   2   1  15    0.80    0.91
  -2  -1 -15    1.64    0.91
  -2   1 -15    3.87    1.41
   2  -1  15    2.37    1.24
   2  -1  15    1.70    0.83
   2   1  15    2.38    1.07
   2   1  16   37.17    3.69
   2   1  16   35.69    3.63
  -2  -1 -16   37.78    3.72
  -2   1 -16   34.91    3.62
   2   1  16   35.68    3.69
  -2  -1 -16   32.86    3.60
  -2   1 -16   34.35    3.51
   2  -1  16   35.54    3.57
   2   1  16   38.54    3.60
   2  -1  16   33.18    3.53
  -2  -1 -17   13.21    2.44
  -2  -1 -17   12.40    1.15
  -2   1 -17   12.75    1.13
  -2   1 -17   12.96    2.40
   2  -1  17   12.61    2.28
  -2   1 -17   12.62    1.18
   2   1  17   14.14    2.58
   2  -1  17   12.19    2.29
  -2   1 -17   11.86    1.13
  -2   1 -17   11.05    1.12
  -2  -1 -17   15.84    2.64
   2  -1  17   12.81    2.22
   2   1  17   14.79    2.30
   2   1  17   10.90    2.23
  -2  -1 -17   14.76    1.24
   2  -1  17   12.28    1.16
  -2   1 -17   17.37    2.63
   2   1  17   11.32    2.18
  -2  -1 -18   11.82    1.11
  -2  -1 -18   12.47    1.20
  -2   1 -18   11.08    1.14
  -2   1 -18   11.83    1.19
  -2  -1 -18   11.88    1.08
  -2  -1 -18   11.34    1.13
   2  -1  18   12.49    2.45
   2  -1  18   11.81    1.17
   2   1  18   13.84    2.45
  -2   1 -18   13.23    2.40
   2  -1  18   10.41    2.11
  -2   1 -18   12.68    1.20
  -2  -1 -18   13.16    2.57
   2   1  18    9.46    2.08
  -2   1 -18   13.10    2.39
  -2   1 -18   11.29    1.12
  -2  -1 -18   11.45    2.28
  -2  -1 -19   16.31    1.30
  -2  -1 -19   16.33    1.36
   2  -1  19   16.36    1.36
  -2  -1 -19   18.87    3.02
   2   1  19   21.94    3.18
   2  -1  19   17.60    2.90
  -2  -1 -19   17.48    1.35
   2  -1  19   16.26    2.53
  -2   1 -19   19.77    1.49
  -2  -1 -19   18.05    1.43
  -2   1 -19   17.12    2.88
  -2   1 -19   18.52    2.91
  -2   1 -19   15.56    1.32
  -2   1 -19   15.62    1.37
  -2   1 -19   16.16    1.31
   2   1  19   16.29    2.78
  -2   1 -20    3.78    0.79
   2  -1  20    4.34    0.79
   2   1  20    4.54    0.77
  -2  -1 -20    4.20    0.75
  -2  -1 -20    3.06    0.68
  -2   1 -20    3.02    0.69
  -2  -1 -20    3.03    0.66
  -2   1 -20    3.08    1.30
  -2   1 -20    3.70    0.72
   2   1  20    3.49    1.24
  -2  -1 -20    3.50    0.75
   2  -1  20    2.28    1.39
  -2   1 -20    3.15    0.70
   2  -1  21   23.81    1.62
   2  -1  21   22.61    2.96
  -2   1 -21   27.32    1.79
  -2   1 -21   23.22    1.65
  -2   1 -21   24.38    1.70
  -2  -1 -21   26.02    1.74
   2   1  21   26.40    1.65
   2   1  21   25.98    3.61
  -2   1 -21   27.06    1.78
   2  -1  21   25.14    1.75
   2   1  21   22.81    3.28
  -2  -1 -21   23.24    1.59
  -2  -1 -21   25.95    1.64
   2  -1  22   30.03    1.90
  -2   1 -22   31.60    1.88
  -2   1 -22   30.34    1.87
  -2  -1 -22   28.99    1.71
   2   1  22   28.56    3.60
   2   1  22   31.84    1.79
  -2   1 -22   30.15    1.78
   2  -1  22   28.83    1.80
  -2   1 -22   32.39    1.90
  -2  -1 -22   30.80    1.84
  -2  -1 -23   14.03    1.16
   2  -1  23   13.34    1.28
   2  -1  23   13.50    1.20
  -2   1 -23   13.48    1.26
  -2   1 -23   13.36    1.24
  -2  -1 -23   13.85    1.29
  -2  -1 -23   13.68    1.26
   2   1  23   13.36    1.12
   2   1  23   12.22    2.25
  -2   1 -23   12.25    1.13
   2  -1  24   14.96    1.28
   2   1  24   14.72    1.25
   2   1  24   14.23    1.12
  -2  -1 -24   13.27    1.09
  -2   1 -24   15.74    1.26
   2  -1  24   16.92    1.41
   2   1  24   13.03    2.54
  -2   1 -24   14.50    1.27
  -2  -1 -24   15.46    1.33
   2  -1  24   14.14    1.17
  -2  -1 -24   14.33    1.23
  -2  -1 -25    3.36    0.58
  -2  -1 -25    3.56    0.68
   2  -1  25    2.64    0.58
  -2   1 -25    3.29    0.60
   2  -1  25    4.34    0.74
   2   1  25    3.34    0.63
   2   1  25    3.68    0.60
  -2   1 -25    3.18    0.63
   2   1  26   15.77    1.12
  -2   1 -26   14.01    1.03
  -2  -1 -26   14.88    1.15
   2   1  26   15.39    1.18
   2  -1  26   16.37    1.18
   2  -1  26   14.92    1.10
   2  -1  26   15.38    1.15
  -2   1 -26   15.50    1.10
   2   1  27    0.80    0.35
  -2  -1 -27   -0.13    0.38
  -2   1 -27    0.14    0.28
  -2   1 -27    0.34    0.32
   2  -1  27    0.06    0.33
   2  -1  27    0.63    0.39
   2   1  27    0.45    0.38
   2  -1  27    0.10    0.31
  -2   1 -28    6.40    0.56
   2   1  28    5.52    0.59
   2   1  28    6.43    0.57
   2  -1  28    6.12    0.58
   2   1  28    6.26    0.62
   2  -1  28    6.37    0.63
  -2  -1 -28    6.87    0.64
   2   1  29    1.14    0.26
   2   1  29    0.56    0.24
   2  -1  29    0.88    0.27
  -2  -2  29    4.04    0.44
  -2  -2  28    1.17    0.33
  -2   2  28    1.11    0.34
  -2   2  28    1.10    0.35
   2   2 -28    1.19    0.35
  -2  -2  28    0.72    0.33
   2   2 -27    8.19    0.78
   2  -2 -27    8.24    0.72
  -2   2  27    7.03    0.71
  -2  -2  27    6.47    0.71
   2  -2 -27    8.39    0.74
  -2  -2  27    8.56    0.80
  -2  -2  26    4.73    0.58
  -2   2  26    4.84    0.68
  -2  -2  26    4.79    0.70
  -2  -2  26    4.47    0.69
  -2   2  26    5.10    0.60
   2   2 -26    5.91    0.78
   2  -2 -26    5.21    0.64
  -2  -2  26    4.64    0.69
   2  -2 -26    5.10    0.69
  -2  -2  25    2.19    0.59
  -2  -2  25    1.79    0.56
   2   2 -25    1.89    0.53
   2  -2 -25    2.33    0.59
  -2  -2  25    3.19    0.66
  -2   2  25    3.31    0.60
   2  -2 -25    2.44    0.57
  -2   2  24    9.76    0.93
   2  -2 -24    9.32    1.03
  -2   2  24    6.30    1.85
  -2   2  24    9.08    2.14
  -2  -2  24   10.18    2.27
   2   2 -24    8.63    0.87
  -2  -2  24    9.98    1.07
   2   2 -24    7.93    0.94
   2  -2 -24   10.41    1.00
  -2  -2  24    9.49    1.04
   2  -2 -23   41.60    2.09
   2   2 -23   43.33    2.27
  -2   2  23   35.41    4.03
  -2  -2  23   42.54    4.48
   2   2 -23   41.54    2.03
   2  -2 -23   42.55    2.20
  -2   2  23   46.85    2.10
  -2  -2  23   44.90    2.30
  -2   2  23   38.68    4.31
  -2  -2  23   42.41    2.20
  -2  -2  22   19.53    1.56
  -2   2  22   20.01    1.44
   2  -2 -22   19.96    1.59
   2  -2 -22   19.39    1.49
  -2   2  22   22.15    3.32
  -2  -2  22   19.64    1.53
   2   2 -22   19.29    1.45
   2   2 -22   19.47    1.57
   2  -2 -21    7.99    1.07
  -2   2  21    5.50    1.90
   2   2 -21    6.68    0.97
   2   2 -21    7.64    1.06
  -2  -2  21    7.31    1.00
  -2  -2  21    6.68    0.98
  -2   2  21    8.32    2.32
   2   2 -21    7.04    1.03
   2  -2 -21    8.13    1.05
  -2   2  21    7.03    0.93
  -2  -2  20   22.75    1.55
  -2   2  20   22.07    3.16
  -2   2  20   26.26    3.66
   2   2 -20   26.55    1.82
   2  -2 -20   26.29    1.82
   2   2 -20   26.04    1.82
  -2  -2  20   26.75    1.86
   2   2 -20   25.51    1.71
  -2  -2  20   24.10    1.73
   2  -2 -20   27.69    1.81
   2  -2 -19    6.38    2.15
   2   2 -19    4.03    1.54
  -2  -2  19    3.50    0.76
  -2   2  19    3.98    1.78
   2  -2 -19    3.73    0.82
  -2   2  19    4.03    1.74
  -2   2  19    4.34    1.56
  -2  -2  19    2.83    0.59
   2   2 -19    2.69    0.69
  -2  -2  19    3.21    1.34
   2   2 -19    3.56    0.75
   2  -2 -19    4.30    0.79
   2   2 -19    2.88    0.71
   2   2 -18   12.35    1.24
  -2  -2  18   13.38    2.33
   2  -2 -18   11.32    1.20
  -2   2  18   12.20    2.38
  -2  -2  18   10.56    1.06
   2  -2 -18   12.89    1.23
  -2   2  18   13.40    2.46
  -2   2  18   10.98    2.24
   2   2 -18   10.53    1.15
  -2  -2  18   15.04    2.45
   2   2 -18   10.08    2.18
  -2  -2  18   15.13    2.69
   2  -2 -18    9.72    2.01
  -2  -2  18   11.17    1.20
   2   2 -18   12.63    1.24
  -2  -2  17   52.25    4.43
  -2  -2  17   55.60    2.47
   2   2 -17   51.91    4.44
   2   2 -17   50.46    2.39
   2   2 -17   52.48    2.38
  -2   2  17   54.02    4.81
   2  -2 -17   58.57    4.98
  -2   2  17   56.53    4.77
  -2   2  17   52.57    4.66
  -2   2  17   55.56    4.66
  -2  -2  17   54.50    4.34
   2  -2 -17   50.88    2.41
   2  -2 -17   55.34    2.43
   2   2 -17   51.02    2.38
  -2   2  17   52.49    4.49
  -2  -2  17   52.65    4.72
  -2  -2  17   52.73    2.31
   2   2 -16   58.00    4.57
  -2   2  16   54.87    4.56
  -2   2  16   57.75    4.62
   2  -2 -16   59.44    4.86
  -2  -2  16   56.37    4.29
  -2   2  16   55.97    4.70
  -2  -2  16   60.28    4.94
  -2   2  16   57.29    4.75
  -2   2  16   57.54    4.50
  -2  -2  16   59.83    4.51
  -2  -2  15   10.43    1.83
   2   2 -15    9.98    1.91
  -2   2  15   11.84    2.12
   2  -2 -15   11.46    2.18
  -2   2  15   11.18    2.12
  -2  -2  15    8.03    1.88
  -2  -2  15    8.21    1.74
  -2   2  15    9.22    1.74
  -2   2  15   11.46    1.99
   2  -2 -14   20.24    2.58
  -2  -2  14   18.23    2.33
  -2  -2  14   19.21    2.45
   2   2 -14   22.40    2.56
  -2  -2  14   20.23    2.80
  -2   2  14   18.17    2.47
  -2   2  14   18.69    2.48
  -2   2  14   20.79    2.62
  -2   2  14   19.89    2.45
  -2  -2  13  111.98    5.44
  -2   2  13  104.72    5.36
  -2  -2  13  106.80    5.80
  -2   2  13  106.27    5.68
   2  -2 -13  106.39    5.69
  -2  -2  13   99.01    5.18
  -2   2  13   99.39    5.59
   2   2 -13  106.34    5.47
  -2   2  13  107.59    5.59
   2   2 -13  109.43    5.03
  -2   2  12   15.38    1.89
   2  -2 -12   12.39    1.87
  -2   2  12   12.49    1.76
   2   2 -12   11.49    1.65
  -2   2  12   13.78    2.02
  -2  -2  12   12.49    1.74
  -2  -2  12   12.76    2.00
   2   2 -12   13.32    1.90
  -2   2  12   10.90    1.87
  -2   2  12   12.82    1.95
  -2   2  11    5.02    1.16
   2   2 -11    3.02    0.87
   2   2 -11    3.53    0.90
  -2  -2  11    3.64    1.16
  -2   2  11    3.85    1.13
  -2  -2  11    1.95    0.72
  -2  -2  11    4.50    1.11
   2  -2 -11    4.57    1.24
  -2   2  11    5.40    1.19
   2   2 -10   52.90    3.34
  -2   2  10   53.73    2.99
  -2   2  10   53.78    2.35
  -2  -2  10   52.05    3.13
   2  -2 -10   52.82    2.91
  -2  -2  10   50.85    3.50
   2   2 -10   50.12    3.03
  -2   2  10   50.43    3.28
  -2   2  10   51.46    3.45
  -2  -2  10   50.93    3.15
   2  -2 -10   55.36    3.51
  -2   2  10   52.93    3.21
   2   2  -9  127.00    4.96
  -2   2   9  116.92    5.09
  -2   2   9  126.97    4.40
  -2   2   9  118.10    4.74
   2  -2  -9  125.45    5.09
  -2  -2   9  124.23    4.65
  -2   2   9  121.94    4.71
  -2  -2   9  124.00    5.28
  -2  -2   9  122.25    4.78
  -2   2   9  132.13    3.91
   2  -2  -9  125.35    4.43
   2  -2  -8  175.68    5.24
  -2   2   8  178.88    5.56
  -2  -2   8  182.13    6.19
   2  -2  -8  182.32    5.94
  -2   2   8  179.05    5.06
  -2   2   8  184.81    4.75
   2   2  -8  186.93    5.80
  -2  -2   8  176.86    5.35
  -2   2   8  176.53    6.05
  -2  -2   8  179.48    5.61
  -2   2   8  174.76    5.43
   2  -2  -7   88.80    3.78
   2   2  -7   88.50    3.70
   2  -2  -7   83.18    3.35
  -2  -2   7   88.88    4.05
  -2   2   7   87.49    3.96
  -2   2   7   86.54    3.41
  -2   2   7   77.11    2.13
  -2   2   7   89.84    2.82
  -2  -2   7   85.89    3.37
  -2   2   7   90.14    3.17
  -2   2   7   85.87    3.49
  -2   2   6   22.40    1.27
   2   2  -6   21.14    1.77
   2  -2  -6   21.37    1.65
  -2   2   6   22.34    1.62
  -2   2   6   22.49    1.87
   2   2  -6   22.95    1.74
   2  -2  -6   21.33    1.57
   2  -2  -6   21.55    1.80
  -2  -2   6   21.06    1.45
  -2   2   6   21.12    1.49
   2  -2  -5   26.79    1.82
  -2   2   5   29.27    1.69
   2   2  -5   29.07    1.81
   2   2  -5   33.18    2.13
  -2   2   5   30.90    2.09
  -2  -2   5   31.05    1.63
  -2   2   5   29.26    1.72
   2  -2  -5   25.74    1.71
   2   2  -5   28.75    1.90
  -2   2   4   65.27    2.91
   2  -2  -4   67.90    2.66
  -2  -2   4   70.39    3.07
   2  -2  -4   62.75    2.59
  -2   2   4   64.90    2.59
   2   2  -4   66.39    2.67
  -2   2   4   68.67    2.87
  -2   2   4   68.10    2.37
   2   2  -4   71.94    3.09
   2  -2  -3   64.91    2.46
  -2   2   3   66.82    2.63
   2  -2  -3   68.89    2.66
  -2   2   3   71.01    2.16
  -2   2   3   66.39    2.66
  -2   2   3   69.98    2.82
   2   2  -3   67.77    2.64
   2   2  -3   67.57    2.76
  -2  -2   3   69.69    2.89
  -2  -2   2  123.99    3.80
  -2   2   2  118.39    3.58
   2  -2  -2  119.91    3.53
  -2   2   2  121.07    3.60
  -2   2   2  121.12    3.41
  -2   2   2  113.05    2.20
   2  -2  -2  115.15    3.13
   2   2  -2  116.48    3.61
   2  -2  -1   21.07    0.81
  -2   2   1   21.42    0.99
  -2  -2   1   22.00    1.56
  -2   2   1   21.16    1.41
  -2   2   1   23.00    1.30
  -2   2   1   22.14    1.48
   2   2  -1   20.74    1.43
  -2   2   0  125.27    2.98
  -2  -2   0  125.10    3.65
  -2   2   0  123.04    3.69
  -2   2   0  134.17    3.56
   2  -2   0  126.62    2.48
   2   2   0  128.68    3.75
   2  -2   1   20.01    1.44
   2   2   1   20.36    1.07
  -2   2  -1   21.60    1.50
  -2  -2  -1   22.27    1.43
  -2   2  -1   22.26    1.29
   2   2   1   20.75    1.49
  -2  -2  -2  118.77    3.31
   2   2   2  118.21    3.66
   2   2   2  115.03    2.95
   2  -2   2  118.21    3.58
  -2   2  -2  118.32    3.41
   2   2   3   72.55    2.44
  -2   2  -3   73.67    2.79
   2   2   3   72.17    2.89
  -2  -2  -3   73.89    2.45
   2  -2   3   69.56    2.82
  -2  -2  -3   72.84    2.79
   2  -2   4   72.18    2.93
  -2  -2  -4   73.28    2.86
   2   2   4   70.79    2.58
  -2   2  -4   69.29    2.92
  -2   2  -4   74.42    3.02
   2   2   4   75.35    3.09
   2   2   5   34.25    1.88
  -2  -2  -5   32.95    2.16
  -2  -2  -5   33.87    1.97
   2   2   5   28.48    2.03
  -2   2  -5   30.92    2.04
   2   2   5   31.16    2.07
  -2   2  -5   31.56    1.98
   2  -2   5   29.73    2.00
  -2   2  -6   19.06    1.70
   2   2   6   21.01    1.63
  -2  -2  -6   21.55    1.86
  -2   2  -6   21.47    1.55
  -2  -2  -6   21.40    1.63
   2   2   6   22.21    1.80
  -2   2  -6   20.44    1.74
   2  -2   6   20.83    1.75
   2   2   6   19.47    1.75
  -2   2  -7   77.70    3.61
   2   2   7   77.66    3.49
  -2   2  -7   77.36    3.20
   2   2   7   77.17    3.38
  -2  -2  -7   78.41    3.73
   2  -2   7   80.54    3.62
  -2  -2  -7   81.22    3.55
   2   2   7   82.59    3.74
   2  -2   7   77.93    3.38
   2  -2   7   79.88    3.66
  -2   2  -7   80.35    2.66
   2   2   7   83.19    3.65
  -2  -2  -7   80.10    3.32
  -2  -2  -8  193.68    6.33
  -2  -2  -8  197.45    5.55
  -2   2  -8  195.62    6.24
  -2  -2  -8  188.42    5.92
  -2   2  -8  197.48    5.66
   2   2   8  191.17    6.23
   2   2   8  194.54    5.91
   2  -2   8  193.34    6.10
   2   2   8  185.70    5.82
   2   2   8  190.18    5.95
  -2   2  -8  192.17    4.30
   2  -2   8  190.02    5.87
  -2   2  -8  191.42    4.41
   2  -2   8  192.64    5.98
   2  -2   8  202.29    6.35
   2  -2   9  121.50    4.88
  -2  -2  -9  133.89    5.44
   2  -2   9  138.91    5.31
  -2   2  -9  133.01    5.00
  -2   2  -9  129.49    4.79
   2   2   9  130.15    4.91
  -2   2  -9  129.22    5.20
   2   2   9  129.73    4.97
  -2  -2  -9  131.79    5.12
   2  -2   9  130.11    5.04
  -2  -2  -9  137.56    4.67
   2   2   9  127.14    5.24
  -2   2 -10   46.84    3.26
  -2  -2 -10   50.82    2.85
  -2   2 -10   46.84    2.97
   2  -2  10   48.12    3.04
  -2   2 -10   48.40    3.08
   2  -2  10   47.64    3.18
   2   2  10   43.93    2.92
   2   2  10   50.14    3.19
   2  -2  10   47.49    3.22
  -2  -2 -10   44.64    3.30
  -2  -2 -10   50.22    3.28
   2  -2  11    5.59    1.19
  -2  -2 -11    4.93    1.25
  -2  -2 -11    4.65    1.17
  -2   2 -11    4.69    0.88
   2  -2  11    6.50    1.39
   2   2  11    3.31    1.08
  -2   2 -11    4.81    1.31
  -2   2 -11    4.04    1.14
   2   2  11    4.20    1.17
   2  -2  11    4.10    1.10
   2   2  11    4.50    1.12
   2   2  11    2.23    0.87
  -2   2 -11    3.63    1.12
  -2  -2 -11    4.44    0.93
   2  -2  12   12.74    1.75
   2  -2  12   16.22    2.12
  -2  -2 -12   14.96    2.09
  -2  -2 -12   14.97    1.68
   2   2  12   12.35    2.03
   2   2  12   14.19    1.92
   2   2  12   13.43    1.98
   2   2  12   14.47    1.80
  -2  -2 -12   14.27    2.12
  -2   2 -12   12.69    1.73
  -2   2 -12   12.86    1.79
   2  -2  12   13.28    1.88
  -2   2 -12   14.97    2.05
   2   2  12   14.59    2.04
   2   2  13  101.55    5.61
   2  -2  13  101.82    5.40
   2  -2  13  103.91    5.53
  -2  -2 -13   96.08    5.54
   2  -2  13  104.38    4.96
  -2  -2 -13  100.92    5.41
  -2   2 -13  101.35    5.45
   2   2  13   98.47    5.25
   2   2  13   99.72    5.54
  -2   2 -13   98.47    5.10
   2   2  13   98.69    5.29
  -2   2 -13  103.25    5.23
   2   2  14   17.51    2.43
  -2   2 -14   18.03    2.41
   2   2  14   19.92    2.50
  -2   2 -14   18.78    2.39
   2   2  14   18.61    2.50
  -2  -2 -14   20.23    2.54
   2   2  14   22.43    2.82
   2  -2  14   18.99    2.50
  -2  -2 -14   20.34    2.71
   2  -2  14   17.46    2.12
   2  -2  14   19.88    2.25
   2  -2  15   10.96    1.98
   2  -2  15   12.43    1.83
   2   2  15   10.31    1.94
   2  -2  15   10.31    1.85
   2   2  15   12.51    2.10
  -2   2 -15   12.06    2.05
   2   2  15   10.35    2.08
  -2  -2 -15   10.93    2.05
  -2   2 -15   11.16    2.06
  -2  -2 -15   11.48    2.19
   2   2  15   11.51    2.06
   2   2  15   11.91    2.24
   2   2  16   59.79    4.65
   2   2  16   57.71    4.45
  -2   2 -16   61.10    4.72
  -2   2 -16   59.49    4.55
   2   2  16   58.05    4.79
  -2  -2 -16   63.78    5.09
   2  -2  16   62.37    4.88
   2  -2  16   59.28    4.25
   2   2  16   59.27    4.76
   2   2  16   56.77    4.74
  -2  -2 -16   61.97    4.77
  -2  -2 -17   47.11    2.20
  -2   2 -17   47.34    4.24
  -2   2 -17   47.48    4.30
   2  -2  17   48.45    2.13
  -2  -2 -17   54.42    4.90
  -2   2 -17   49.37    2.30
   2  -2  17   48.36    2.26
   2   2  17   49.09    4.54
   2   2  17   47.05    4.46
   2   2  17   52.86    4.37
  -2   2 -17   48.21    2.26
  -2   2 -17   48.29    2.28
   2   2  17   48.61    4.37
   2  -2  17   50.19    4.48
   2  -2  17   48.90    4.05
   2   2  17   49.90    4.51
  -2  -2 -17   47.13    2.28
  -2   2 -18   11.54    1.20
  -2  -2 -18   10.73    1.08
   2   2  18    9.38    2.01
  -2   2 -18   12.01    1.19
  -2  -2 -18   10.60    2.37
  -2   2 -18   10.64    1.13
   2  -2  18   10.52    1.10
  -2   2 -18    9.19    2.09
  -2   2 -18    9.86    2.19
   2  -2  18   11.19    1.17
   2   2  18   11.44    2.34
   2   2  18   10.68    2.18
   2  -2  18   11.94    2.33
  -2  -2 -18   11.70    1.17
   2   2  18   12.05    2.38
   2  -2  18   10.73    1.01
   2   2  18   10.86    2.25
  -2   2 -19    3.53    0.75
   2  -2  19    3.68    0.74
  -2   2 -19    3.33    0.70
  -2   2 -19    3.39    0.76
  -2   2 -19    2.88    1.29
  -2  -2 -19    3.67    0.74
   2   2  19    3.55    1.61
   2   2  19    3.61    1.37
   2  -2  19    3.47    1.44
   2  -2  19    3.49    0.72
  -2   2 -19    2.10    1.37
  -2  -2 -19    3.06    1.32
   2  -2  20   28.20    1.85
   2  -2  20   27.80    1.74
  -2   2 -20   28.40    1.85
  -2  -2 -20   29.69    1.88
  -2   2 -20   29.00    1.82
   2   2  20   28.80    3.76
  -2   2 -20   32.08    3.79
  -2   2 -20   28.46    1.83
  -2   2 -21    8.07    1.05
   2  -2  21    7.49    1.02
  -2  -2 -21    6.99    1.00
  -2   2 -21    8.94    2.09
  -2   2 -21    7.05    0.96
   2   2  21    7.91    0.95
   2  -2  21    7.82    0.96
  -2   2 -21    8.52    1.02
   2   2  21    5.93    1.77
  -2  -2 -22   19.46    1.57
   2   2  22   20.99    3.22
  -2   2 -22   19.25    1.50
  -2   2 -22   17.27    1.42
   2  -2  22   17.05    1.37
   2   2  22   18.92    1.46
  -2   2 -22   21.21    1.55
   2  -2  22   18.29    1.48
  -2  -2 -22   19.56    1.50
   2   2  22   18.58    3.06
  -2  -2 -23   44.35    2.21
   2  -2  23   43.67    2.20
   2  -2  23   42.76    2.08
  -2   2 -23   46.37    2.25
  -2  -2 -23   44.41    2.26
   2  -2  23   44.78    2.28
   2   2  23   45.89    4.49
  -2   2 -23   44.07    2.19
   2   2  23   46.68    2.04
   2   2  24    8.79    0.94
   2  -2  24    7.64    0.91
  -2  -2 -24    7.97    0.97
   2   2  24    8.35    0.85
   2  -2  24    7.33    0.90
  -2   2 -24    8.74    0.99
   2   2  24    5.78    1.83
  -2   2 -24    7.99    0.94
   2  -2  24    6.42    0.93
   2  -2  25    2.51    0.63
   2   2  25    2.72    0.58
  -2   2 -25    1.68    0.50
  -2   2 -25    2.61    0.58
   2  -2  25    1.53    0.53
   2  -2  25    1.44    0.47
  -2   2 -25    2.28    0.55
  -2  -2 -25    2.40    0.59
  -2  -2 -26    5.45    0.72
   2  -2  26    5.40    0.67
  -2   2 -26    5.45    0.64
   2   2  26    5.72    0.70
   2  -2  26    6.07    0.75
  -2   2 -26    5.21    0.67
   2  -2  26    4.98    0.67
   2  -2  27    6.74    0.70
  -2   2 -27    6.17    0.63
  -2  -2 -27    7.56    0.74
   2   2  27    6.62    0.73
   2  -2  27    6.33    0.66
  -2   2 -27    6.94    0.64
   2   2  27    6.82    0.63
  -2   2 -28    1.21    0.28
   2  -2  28    0.51    0.25
   2  -2  28    0.69    0.33
   2   2  28    1.24    0.30
  -2  -2 -28    0.55    0.25
  -2   2 -28    1.07    0.29
   2   2  28    1.47    0.35
   2   2  28    1.23    0.36
  -2   3  28   11.77    0.77
  -2   3  28   11.71    0.68
  -2  -3  28   11.12    0.74
   2   3 -28   10.07    0.73
  -2  -3  28   10.30    0.64
   2   3 -27    5.86    0.65
  -2  -3  27    4.55    0.61
   2  -3 -27    5.94    0.60
  -2   3  27    4.46    0.55
  -2  -3  27    5.11    0.60
  -2   3  26    3.50    0.55
   2   3 -26    2.71    0.57
   2  -3 -26    2.76    0.52
  -2  -3  26    2.69    0.58
  -2  -3  26    2.40    0.54
   2  -3 -26    2.78    0.55
  -2  -3  25   23.45    1.51
   2  -3 -25   23.60    1.41
  -2  -3  25   24.85    1.28
   2  -3 -25   26.53    1.51
   2   3 -25   23.79    1.27
   2   3 -25   24.52    1.50
  -2  -3  25   23.72    1.47
   2   3 -24    2.98    0.60
   2  -3 -24    2.91    0.64
  -2   3  24    3.50    1.49
   2   3 -24    2.19    0.60
   2  -3 -24    2.81    0.62
  -2  -3  24    3.49    0.63
  -2  -3  24    2.32    0.54
  -2   3  24    2.04    1.01
  -2  -3  24    2.72    0.61
  -2  -3  24    2.64    0.65
  -2  -3  24    1.91    0.57
  -2  -3  23    9.53    2.11
   2   3 -23    8.33    0.93
  -2  -3  23    8.30    1.06
   2   3 -23    7.74    1.01
   2  -3 -23    8.81    1.00
  -2  -3  23    7.92    0.89
   2  -3 -23    8.91    0.98
  -2   3  23    6.42    1.89
  -2  -3  23    7.65    0.99
  -2  -3  23    7.12    0.94
  -2  -3  22    4.90    0.83
  -2   3  22    8.84    2.22
   2   3 -22    6.24    0.85
  -2  -3  22    6.32    2.02
   2  -3 -22    6.43    0.92
  -2  -3  22    5.19    0.88
   2  -3 -22    6.78    0.95
   2   3 -22    5.49    0.90
  -2   3  21    0.84    1.18
   2   3 -21    1.29    0.55
   2  -3 -21    0.79    0.59
  -2   3  21    2.29    1.41
   2  -3 -21    0.57    0.53
   2   3 -21    1.45    0.61
  -2  -3  21    0.42    0.48
  -2  -3  21   -0.02    0.56
  -2  -3  21    0.73    1.10
   2   3 -21    0.68    0.54
   2  -3 -20   20.54    1.59
   2   3 -20   21.24    1.59
   2   3 -20   21.25    1.65
   2   3 -20   22.38    1.67
  -2   3  20   23.61    3.39
  -2   3  20   27.00    3.63
  -2  -3  20   22.55    1.73
  -2  -3  20   20.97    1.65
   2  -3 -20   21.94    1.65
   2  -3 -19    5.30    0.89
  -2   3  19    5.56    1.82
   2   3 -19    5.52    0.89
   2   3 -19    4.84    0.83
  -2   3  19    5.38    1.66
  -2  -3  19    4.73    0.87
   2  -3 -19    5.51    0.93
   2   3 -19    7.22    1.02
  -2  -3  19    7.52    2.13
  -2  -3  19    6.50    0.97
   2   3 -18    5.02    0.80
   2  -3 -18    4.19    0.83
   2   3 -18    2.02    1.30
  -2  -3  18    3.88    0.80
  -2   3  18    3.22    1.41
   2  -3 -18    4.06    0.82
   2   3 -18    4.77    0.94
  -2   3  18    3.31    1.30
   2  -3 -18    5.66    1.95
  -2  -3  18    2.26    1.24
   2   3 -18    3.72    0.77
  -2   3  18    6.68    1.90
  -2  -3  18    6.10    0.94
  -2   3  18    3.44    1.48
  -2  -3  18    4.02    0.74
  -2   3  18    4.42    1.47
   2   3 -17   24.89    1.70
  -2  -3  17   23.31    2.88
   2   3 -17   22.23    2.93
  -2   3  17   28.00    3.39
  -2  -3  17   25.13    1.73
   2  -3 -17   25.05    3.45
  -2   3  17   20.87    3.08
   2  -3 -17   24.11    1.65
  -2  -3  17   24.33    1.70
   2   3 -17   23.37    1.64
  -2   3  17   26.74    3.37
  -2   3  17   26.77    3.40
   2   3 -17   23.66    1.62
   2  -3 -17   25.91    1.74
  -2  -3  17   23.42    1.55
  -2   3  17   20.79    2.86
  -2  -3  16    9.18    1.14
  -2   3  16   10.39    2.21
   2  -3 -16   10.19    2.13
   2   3 -16    7.48    1.76
  -2  -3  16    7.86    1.68
   2   3 -16    9.06    1.02
   2   3 -16    6.26    0.92
  -2   3  16    6.25    1.74
   2  -3 -16    8.32    1.02
  -2  -3  16    6.64    0.93
  -2  -3  16    8.16    0.96
  -2   3  16   10.83    2.22
   2   3 -16    7.22    0.96
  -2   3  16    8.33    1.86
   2  -3 -16    8.15    1.01
  -2   3  15   89.31    5.61
  -2   3  15   82.98    5.57
   2  -3 -15   93.13    5.90
  -2   3  15   84.06    5.78
   2   3 -15   90.34    5.46
   2   3 -15   89.71    5.22
  -2  -3  15   88.26    5.27
  -2   3  15   85.37    5.29
  -2   3  14    2.30    1.06
  -2   3  14    3.21    1.28
   2   3 -14    3.09    1.06
  -2   3  14    2.81    1.18
  -2  -3  14    2.55    1.03
  -2   3  14    2.10    1.23
  -2   3  14    3.26    1.09
   2  -3 -14    2.94    1.11
   2   3 -14    1.33    0.85
  -2  -3  13    6.15    1.34
  -2   3  13    8.72    1.63
  -2   3  13    7.45    1.38
  -2   3  13    7.90    1.69
   2   3 -13    6.75    1.44
  -2   3  13    5.23    1.35
  -2  -3  13    8.46    1.57
   2   3 -13    6.84    1.50
  -2   3  13   10.53    1.87
   2  -3 -13    7.52    1.59
  -2  -3  12   23.20    2.41
  -2   3  12   24.81    2.32
  -2   3  12   27.76    2.72
  -2   3  12   24.31    2.47
  -2   3  12   23.94    2.52
   2  -3 -12   22.18    2.54
   2   3 -12   24.27    2.52
   2   3 -12   25.00    2.55
  -2  -3  12   22.95    2.30
  -2   3  12   23.67    2.71
   2   3 -11   74.58    4.20
   2   3 -11   70.05    4.03
  -2   3  11   74.78    4.13
  -2   3  11   72.75    4.55
  -2   3  11   74.53    4.21
  -2  -3  11   71.52    3.85
  -2  -3  11   68.28    3.83
   2  -3 -11   72.92    4.37
   2  -3 -11   70.71    3.96
  -2   3  11   74.23    3.75
  -2   3  10   18.74    2.02
  -2  -3  10   19.63    1.90
   2  -3 -10   20.56    2.06
   2  -3 -10   21.42    2.27
  -2   3  10   22.75    2.48
  -2   3  10   20.91    1.90
  -2  -3  10   17.13    1.83
  -2   3  10   20.06    2.03
   2   3 -10   19.23    2.04
   2   3  -9   70.32    4.17
  -2   3   9   71.14    3.28
  -2   3   9   74.07    4.19
  -2   3   9   70.33    3.68
  -2   3   9   73.95    2.94
  -2   3   9   72.92    3.12
   2   3  -9   73.41    3.74
   2   3  -9   68.20    3.78
   2   3  -9   70.16    3.34
  -2  -3   9   72.64    3.62
   2  -3  -9   70.95    3.87
  -2  -3   9   68.82    3.34
   2  -3  -9   72.95    3.71
  -2  -3   8  149.65    4.75
  -2   3   8  144.67    5.12
   2   3  -8  150.87    5.07
   2   3  -8  159.76    5.36
  -2  -3   8  154.72    4.25
   2   3  -8  146.62    5.92
  -2  -3   8  150.62    5.07
  -2   3   8  152.42    5.87
   2  -3  -8  152.21    5.27
  -2   3   8  155.15    4.50
  -2   3   8  151.29    4.48
   2  -3  -8  158.91    5.57
   2   3  -8  152.52    5.60
   2   3  -7  138.15    5.19
   2   3  -7  145.65    4.89
   2   3  -7  139.45    5.54
   2  -3  -7  144.94    5.04
  -2   3   7  143.69    4.36
  -2  -3   7  140.45    3.79
  -2   3   7  140.44    5.40
  -2  -3   7  144.53    5.52
  -2   3   7  138.78    4.13
  -2   3   7  138.75    4.70
   2  -3  -7  143.06    4.95
  -2  -3   7  142.42    4.29
   2   3  -7  137.84    4.73
  -2   3   6   11.00    1.23
   2  -3  -6   10.69    1.34
  -2   3   6    9.85    1.41
   2  -3  -6   11.18    1.34
   2   3  -6   13.08    1.30
  -2   3   6   11.72    1.21
   2   3  -6   11.45    1.55
  -2  -3   6   10.22    1.50
  -2  -3   6   10.59    1.08
   2   3  -6   10.99    1.49
   2   3  -5   19.62    1.80
   2   3  -5   18.49    1.72
   2  -3  -5   19.42    1.57
  -2   3   5   19.26    1.79
   2  -3  -5   20.75    1.73
  -2  -3   5   18.74    1.24
   2   3  -5   19.84    1.55
  -2  -3   5   19.05    1.85
  -2   3   5   19.20    1.56
  -2  -3   4   34.84    1.52
   2  -3  -4   33.37    2.18
  -2  -3   4   35.16    1.36
  -2   3   4   38.29    2.34
   2   3  -4   37.75    2.26
   2  -3  -4   35.46    1.96
  -2  -3   4   34.94    2.40
  -2   3   4   37.44    2.13
   2   3  -4   39.88    2.50
  -2  -3   3  858.17   11.86
   2  -3  -3  863.08   13.25
  -2   3   3  897.71   14.04
  -2   3   3  905.11   14.29
  -2   3   3  906.65   14.56
   2   3  -3  882.68   14.44
  -2  -3   3  834.30   12.36
   2   3  -3  933.11   15.41
  -2  -3   3  916.46   15.29
   2  -3  -3  885.88   14.53
   2   3  -3  891.51   14.57
   2   3  -2  129.88    4.52
  -2  -3   2  128.76    4.55
   2  -3  -2  128.23    4.18
  -2   3   2  131.94    4.15
   2   3  -2  129.14    4.13
  -2  -3   2  120.66    3.30
  -2   3   2  138.59    3.80
   2   3  -2  131.01    4.23
   2   3  -2  134.03    4.60
   2  -3  -2  131.52    3.33
  -2   3   2  132.65    4.04
   2   3  -1   33.59    2.02
  -2   3   1   33.97    1.82
   2  -3  -1   32.68    2.03
  -2  -3   1   34.00    2.21
  -2   3   1   32.71    1.83
   2   3  -1   36.93    2.35
  -2   3   1   34.39    2.06
  -2   3   1   36.73    1.71
  -2  -3   1   31.42    1.71
   2  -3  -1   32.65    1.37
   2   3  -1   33.19    2.18
  -2   3   0   50.88    2.24
   2   3   0   51.59    2.70
  -2   3   0   49.67    1.84
  -2  -3   0   45.77    2.22
  -2   3   0   48.26    2.49
   2   3   0   51.01    2.44
   2  -3   0   49.34    1.52
   2   3   0   52.09    2.67
   2  -3   0   57.98    2.62
  -2  -3   0   49.94    2.70
   2  -3   1   32.68    1.98
   2  -3   1   28.72    0.99
  -2   3  -1   32.76    1.75
   2   3   1   30.85    2.03
  -2   3  -1   31.34    2.03
  -2   3  -1   35.58    1.81
   2   3   1   35.46    2.08
  -2  -3  -1   31.71    1.92
  -2   3  -2  121.75    4.10
  -2  -3  -2  124.11    4.14
   2  -3   2  122.97    3.83
   2   3   2  116.17    2.75
  -2   3  -2  124.51    3.82
   2   3   2  122.25    4.06
   2   3   2  125.41    4.02
  -2  -3  -2  112.70    3.94
   2  -3   2  125.45    4.17
   2  -3   3  898.91   14.21
   2   3   3  863.02   14.22
   2  -3   3  900.32   14.82
   2   3   3  882.95   14.41
   2   3   3  846.95   13.88
  -2   3  -3  913.88   14.37
   2   3   3  863.40   12.55
  -2  -3  -3  857.24   14.60
   2   3   4   34.13    1.71
  -2   3  -4   36.25    2.23
   2   3   4   35.55    1.93
   2   3   4   34.58    2.17
  -2   3  -4   37.39    2.40
   2  -3   4   35.03    2.11
  -2   3  -4   37.39    2.30
   2   3   4   34.28    1.99
   2  -3   4   33.40    2.29
  -2  -3  -4   33.10    2.22
   2   3   5   17.40    1.35
   2  -3   5   16.53    1.58
   2   3   5   17.28    1.41
   2  -3   5   18.46    1.75
  -2   3  -5   17.30    1.64
   2   3   5   16.27    1.62
  -2   3  -5   16.69    1.71
  -2  -3  -5   17.53    1.67
  -2   3  -6   11.82    1.48
   2  -3   6   13.45    1.45
   2   3   6   13.14    1.18
   2   3   6   12.24    1.47
   2  -3   6   14.54    1.68
  -2   3  -6   13.58    1.55
   2   3   6   12.39    1.48
  -2  -3  -6   11.34    1.38
   2   3   6   13.60    1.32
  -2  -3  -7  144.53    5.06
   2   3   7  143.20    4.00
   2  -3   7  142.82    5.22
   2  -3   7  148.00    5.13
  -2  -3  -7  146.71    5.35
   2   3   7  145.87    5.28
  -2   3  -7  143.52    5.29
  -2   3  -7  149.61    5.40
  -2   3  -7  148.93    4.51
  -2  -3  -7  143.42    4.87
   2   3   7  142.70    5.28
  -2   3  -7  139.89    5.26
   2   3   7  145.16    4.70
   2   3   8  136.36    4.84
  -2   3  -8  134.81    5.25
   2  -3   8  138.18    5.25
  -2   3  -8  127.77    4.22
  -2  -3  -8  143.40    5.08
   2  -3   8  138.12    5.15
  -2   3  -8  131.25    4.33
  -2  -3  -8  128.29    4.89
  -2  -3  -8  133.78    5.37
   2   3   8  133.47    5.28
  -2   3  -8  132.21    5.32
   2   3   8  132.17    5.29
  -2   3  -9   64.20    3.19
   2  -3   9   65.98    3.70
   2   3   9   64.62    3.85
  -2  -3  -9   71.85    4.08
   2   3   9   64.77    3.46
  -2  -3  -9   69.02    3.72
  -2   3  -9   63.51    3.75
  -2   3  -9   65.15    3.75
   2  -3   9   63.82    3.63
   2   3   9   69.82    3.76
   2   3   9   65.28    3.60
  -2  -3  -9   69.96    3.61
  -2   3  -9   63.57    2.78
  -2   3  -9   64.61    2.92
  -2   3  -9   62.25    3.79
   2  -3  10   16.48    1.92
   2   3  10   18.09    2.08
  -2   3 -10   18.31    2.17
   2   3  10   19.88    2.07
   2   3  10   18.61    2.13
  -2  -3 -10   17.48    1.98
  -2   3 -10   17.09    1.75
  -2  -3 -10   16.92    2.06
   2  -3  10   18.47    2.11
  -2   3 -10   17.16    2.04
   2   3  10   14.13    1.73
  -2  -3 -10   21.30    2.10
  -2   3 -10   16.76    2.02
  -2   3 -11   76.52    4.49
   2   3  11   79.93    4.32
   2  -3  11   83.51    4.56
   2  -3  11   72.04    4.14
  -2  -3 -11   77.70    4.32
  -2   3 -11   80.06    4.49
  -2  -3 -11   85.72    4.86
  -2   3 -11   79.96    4.00
   2   3  11   76.48    4.19
   2   3  11   80.94    4.65
  -2  -3 -11   80.78    4.15
   2  -3  12   19.90    2.23
   2   3  12   22.50    2.67
   2   3  12   22.65    2.36
   2   3  12   25.17    2.51
  -2  -3 -12   18.87    2.44
  -2   3 -12   22.98    2.28
  -2  -3 -12   22.58    2.52
  -2   3 -12   24.34    2.61
  -2  -3 -12   26.61    2.44
   2  -3  12   20.44    2.37
  -2   3 -12   22.06    2.51
   2  -3  13    6.91    1.38
   2   3  13    7.59    1.44
  -2  -3 -13    6.43    1.41
  -2   3 -13    9.11    1.68
  -2  -3 -13    6.12    1.46
  -2   3 -13    6.74    1.36
   2   3  13    8.72    1.82
   2   3  13    6.07    1.40
  -2   3 -13    5.87    1.42
   2  -3  13    6.47    1.53
  -2  -3 -13    6.12    1.28
   2   3  13    6.69    1.49
   2   3  13    4.61    1.31
  -2   3 -14    1.38    0.89
  -2   3 -14    2.98    1.15
   2   3  14    2.18    1.03
  -2  -3 -14    1.40    0.87
   2  -3  14    2.51    1.20
   2  -3  14    1.86    0.96
   2   3  14    2.75    1.30
  -2   3 -14    2.73    1.20
   2   3  14    2.79    1.17
   2   3  14    2.05    0.98
  -2  -3 -15   90.53    6.01
  -2   3 -15   92.30    5.70
   2   3  15   88.89    5.81
   2  -3  15   90.65    5.67
   2  -3  15   88.42    4.95
   2   3  15   89.56    5.48
   2   3  15   88.68    5.89
  -2   3 -15   87.09    5.17
   2   3  15   90.66    5.52
  -2   3 -16    9.98    1.05
  -2  -3 -16   11.84    1.13
  -2   3 -16   10.21    1.10
   2  -3  16    9.18    1.13
   2   3  16    8.20    1.91
   2  -3  16    8.59    1.03
  -2   3 -16    9.11    1.02
   2   3  16   10.90    2.06
  -2   3 -16   10.33    2.07
   2   3  16   10.71    2.26
   2  -3  16   11.39    2.12
   2  -3  16    9.07    1.01
  -2  -3 -16    7.86    1.94
   2   3  16   10.35    2.17
   2   3  16    8.56    2.06
   2  -3  17   21.95    1.59
   2   3  17   24.94    3.30
   2   3  17   21.60    3.09
  -2   3 -17   22.15    1.58
  -2   3 -17   21.57    1.51
   2  -3  17   21.78    1.55
   2  -3  17   23.67    1.50
  -2   3 -17   24.29    3.16
   2   3  17   24.74    3.04
   2  -3  17   20.62    3.01
  -2  -3 -17   23.10    1.57
   2   3  17   22.13    3.07
  -2  -3 -17   19.22    2.97
   2   3  17   20.46    2.97
  -2   3 -17   22.81    1.59
   2   3  18    1.03    1.02
  -2  -3 -18    3.17    0.66
   2  -3  18    5.02    0.79
  -2   3 -18    4.28    0.86
  -2   3 -18    3.01    1.38
   2   3  18    2.94    1.11
  -2   3 -18    3.90    0.80
  -2  -3 -18    2.33    1.40
   2   3  18    5.00    1.79
   2  -3  18    3.82    0.81
   2  -3  18    4.11    1.33
   2  -3  18    5.12    0.83
   2   3  18    2.88    1.17
  -2   3 -18    3.50    0.73
   2   3  18    2.40    1.21
  -2  -3 -19    5.55    0.93
  -2   3 -19    6.10    0.94
   2   3  19    5.97    1.89
  -2   3 -19    5.11    1.64
   2  -3  19    4.82    0.79
   2   3  19    5.82    1.73
   2   3  19    5.32    1.74
  -2   3 -19    4.93    0.81
   2  -3  19    3.90    1.64
   2  -3  19    5.78    0.85
  -2   3 -19    5.41    0.87
   2  -3  19    4.67    0.80
  -2  -3 -20   17.83    1.54
  -2  -3 -20   20.04    1.56
   2  -3  20   16.32    1.45
  -2   3 -20   19.79    1.54
  -2   3 -20   19.59    1.54
   2  -3  20   19.22    1.49
  -2   3 -20   17.56    2.82
   2  -3  20   17.01    1.50
  -2   3 -20   20.96    1.56
   2   3  20   19.95    3.15
  -2   3 -21    1.04    0.46
  -2  -3 -21    0.69    0.51
   2  -3  21    0.84    0.53
  -2   3 -21    0.93    0.56
   2  -3  21    0.72    0.53
  -2   3 -21    0.98    0.98
  -2   3 -21    0.63    0.49
   2   3  21   -0.43    0.95
   2  -3  21    0.69    0.44
  -2  -3 -21    0.56    0.46
   2  -3  21    1.18    0.59
   2  -3  22    6.15    0.93
  -2  -3 -22    4.11    0.81
   2  -3  22    5.04    0.81
  -2   3 -22    6.22    0.87
   2  -3  22    5.93    0.91
   2   3  22    5.75    0.77
  -2   3 -22    6.21    0.88
   2  -3  22    5.16    0.83
  -2  -3 -22    6.98    0.99
  -2   3 -22    6.93    0.97
   2   3  22    5.16    1.82
  -2   3 -23    8.15    0.97
   2  -3  23    6.60    0.90
   2  -3  23    9.27    1.05
  -2   3 -23    8.13    0.95
  -2   3 -23    8.62    1.00
   2   3  23    9.30    2.21
   2   3  23   10.52    2.47
  -2  -3 -23    7.27    0.91
  -2  -3 -23    6.31    0.93
   2  -3  23    7.96    0.99
   2  -3  24    2.46    0.55
   2  -3  24    2.83    0.63
   2   3  24    1.27    1.14
  -2   3 -24    2.90    0.61
   2  -3  24    2.16    0.59
  -2  -3 -24    3.05    0.70
  -2   3 -24    2.16    0.55
  -2   3 -25   21.57    1.37
  -2   3 -25   23.00    1.33
  -2  -3 -25   20.88    1.38
   2   3  25   24.02    1.38
   2  -3  25   22.93    1.43
  -2   3 -25   21.68    1.40
   2  -3  25   20.95    1.30
   2  -3  26    3.01    0.52
   2   3  26    3.13    0.52
  -2   3 -26    2.46    0.46
  -2  -3 -26    2.83    0.55
  -2   3 -26    2.21    0.47
   2  -3  26    2.38    0.51
   2  -3  27    6.99    0.66
  -2   3 -27    6.12    0.63
  -2   3 -27    5.69    0.53
  -2  -3 -27    6.04    0.64
   2  -3  27    5.49    0.52
   2   3  27    5.94    0.64
   2   3  27    5.99    0.58
  -2   3 -28    8.69    0.58
   2  -3  28    9.58    0.66
  -2  -3 -28   10.17    0.71
   2   3  28   10.75    0.68
   2   3  28    9.98    0.72
   2   4 -28    0.21    0.20
  -2  -4  27    7.37    0.57
   2  -4 -27    8.48    0.66
   2   4 -27    8.96    0.74
  -2  -4  27    8.03    0.69
  -2   4  27    8.73    0.65
  -2  -4  26    7.39    0.76
  -2   4  26    8.12    0.72
  -2  -4  26    6.68    0.68
   2  -4 -26    6.63    0.71
   2   4 -26    7.06    0.75
   2  -4 -25    0.10    0.35
   2   4 -25    0.61    0.31
  -2  -4  25    0.81    0.41
  -2  -4  25    0.46    0.31
   2   4 -25    0.95    0.46
  -2  -4  25    0.54    0.40
  -2  -4  24    2.79    0.59
   2   4 -24    2.65    0.58
   2   4 -24    3.16    0.58
  -2  -4  24    3.40    0.69
   2  -4 -24    2.21    0.53
   2  -4 -24    2.57    0.57
  -2  -4  24    2.53    0.53
  -2  -4  23   11.68    1.03
  -2  -4  23   11.27    2.26
   2  -4 -23   11.57    1.13
  -2  -4  23   10.57    1.06
   2   4 -23   12.07    1.16
   2  -4 -23   12.36    1.16
   2   4 -23   11.43    1.05
  -2  -4  23   10.77    1.12
  -2   4  23   11.82    2.36
  -2  -4  23   11.03    1.13
   2   4 -22   -0.25    0.48
  -2  -4  22   -0.04    0.49
  -2  -4  22   -0.55    0.99
   2   4 -22    0.17    0.45
  -2   4  22   -0.25    0.94
   2  -4 -22   -0.71    0.53
  -2  -4  22    0.47    0.48
   2   4 -22    0.00    0.44
  -2  -4  22   -0.24    0.64
  -2  -4  22   -0.33    0.49
   2  -4 -22    0.31    0.44
   2   4 -21   54.84    2.58
   2  -4 -21   57.98    2.62
  -2  -4  21   52.87    5.11
  -2  -4  21   58.42    2.65
   2   4 -21   54.82    2.55
  -2   4  21   56.53    5.15
  -2  -4  21   57.67    2.71
   2  -4 -21   55.30    2.58
   2   4 -21   58.12    2.59
  -2  -4  21   57.02    2.68
   2  -4 -20   19.82    1.72
  -2  -4  20   18.27    3.04
  -2   4  20   17.67    3.02
  -2   4  20   19.71    3.21
   2  -4 -20   19.96    1.56
  -2  -4  20   19.82    1.60
  -2  -4  20   20.37    1.58
   2   4 -20   18.20    1.49
  -2  -4  20   19.08    1.60
   2   4 -20   18.93    1.54
   2   4 -20   20.47    1.56
  -2   4  19  142.49    8.17
  -2  -4  19  129.72    8.09
   2  -4 -19  133.19    4.19
  -2  -4  19  134.06    4.31
   2   4 -19  131.54    4.14
   2   4 -19  129.16    4.11
  -2   4  19  133.84    7.44
   2  -4 -19  136.25    4.25
  -2  -4  19  131.41    4.28
   2   4 -19  134.57    4.12
  -2   4  19  133.63    8.05
  -2   4  18   15.40    2.79
  -2   4  18   10.10    2.27
  -2   4  18   11.87    2.48
  -2  -4  18   10.93    1.23
   2   4 -18   10.83    1.14
   2  -4 -18   12.55    2.56
   2   4 -18    9.76    1.16
  -2  -4  18   10.23    1.21
  -2  -4  18   12.11    2.52
   2  -4 -18   10.90    1.21
   2  -4 -18   10.71    1.19
   2   4 -18   10.58    1.14
  -2   4  18    8.49    1.94
  -2   4  17   27.92    3.67
  -2   4  17   30.75    3.79
   2  -4 -17   26.32    1.78
  -2  -4  17   28.13    1.89
   2   4 -17   27.93    1.81
   2   4 -17   26.39    1.75
  -2  -4  17   27.56    1.87
   2   4 -17   27.54    1.83
  -2   4  17   30.75    3.62
   2  -4 -17   31.93    3.77
   2  -4 -17   28.21    1.87
  -2   4  17   24.67    3.05
  -2  -4  17   30.02    3.87
   2   4 -16   10.61    1.03
  -2   4  16    9.11    2.34
   2   4 -16   11.68    1.22
   2  -4 -16   11.48    2.35
  -2   4  16   13.33    2.30
   2   4 -16    9.98    1.08
   2  -4 -16   11.78    1.02
   2   4 -16    9.98    1.96
   2  -4 -16   11.30    1.17
  -2  -4  16   11.39    1.26
  -2  -4  16   13.44    2.55
  -2   4  16   11.94    2.21
  -2   4  16   12.38    2.13
   2   4 -16   11.34    1.12
   2  -4 -16   11.41    1.19
  -2  -4  16   12.81    1.32
  -2  -4  15   62.89    2.72
  -2   4  15   63.55    4.77
  -2  -4  15   65.50    5.28
   2  -4 -15   63.89    2.69
   2   4 -15   63.08    2.57
  -2   4  15   60.10    4.50
   2  -4 -15   60.08    4.81
  -2   4  15   68.58    5.20
   2   4 -15   67.31    4.64
  -2  -4  15   61.63    4.23
   2   4 -15   63.61    2.57
   2   4 -15   61.93    2.61
  -2  -4  15   65.05    2.75
  -2   4  15   64.65    5.28
   2   4 -15   65.69    4.75
   2  -4 -15   62.94    2.63
   2  -4 -14   67.19    4.93
  -2   4  14   63.62    4.65
  -2   4  14   60.27    4.90
  -2   4  14   58.25    4.67
  -2   4  14   60.98    4.54
   2   4 -14   66.87    4.43
  -2  -4  14   57.90    3.93
  -2   4  14   61.50    4.36
  -2  -4  14   59.44    4.90
   2   4 -14   59.68    4.41
  -2   4  13   24.89    3.10
  -2  -4  13   25.70    3.14
  -2  -4  13   22.23    2.39
   2   4 -13   23.31    2.56
  -2   4  13   25.58    2.85
   2   4 -13   22.54    2.66
  -2   4  13   23.33    2.73
  -2   4  13   26.62    2.79
   2  -4 -13   22.62    2.82
   2   4 -12   76.57    4.42
   2  -4 -12   75.04    4.58
  -2   4  12   73.95    4.60
  -2  -4  12   68.28    3.88
  -2  -4  12   72.17    4.95
   2  -4 -12   72.81    4.74
  -2   4  12   70.83    4.30
  -2   4  12   77.24    5.16
   2   4 -12   74.71    4.69
  -2   4  12   72.03    4.54
  -2   4  11    2.35    0.99
   2   4 -11    0.77    0.67
   2  -4 -11    1.19    0.80
  -2  -4  11    1.46    0.64
   2   4 -11    1.61    0.65
   2   4 -11   -0.26    0.79
  -2   4  11    0.35    0.55
  -2  -4  11    1.77    0.87
   2  -4 -11    0.94    0.70
  -2   4  11    2.54    0.97
  -2   4  11    0.99    0.60
   2  -4 -10   22.02    2.34
  -2   4  10   23.58    2.01
  -2  -4  10   23.05    1.99
  -2  -4  10   21.36    2.52
   2   4 -10   22.92    2.25
  -2   4  10   25.23    2.74
   2   4 -10   22.28    2.10
   2   4 -10   24.90    2.46
  -2   4  10   25.48    2.39
   2  -4 -10   25.59    2.49
   2   4 -10   23.71    2.71
  -2   4   9   21.08    2.09
   2   4  -9   23.93    2.12
   2   4  -9   21.74    2.46
   2  -4  -9   23.63    2.28
  -2  -4   9   21.98    2.48
   2   4  -9   26.32    2.49
  -2   4   9   22.46    2.49
   2  -4  -9   23.94    2.37
   2   4  -9   21.94    2.10
  -2   4   9   23.34    1.95
  -2  -4   9   21.78    1.82
  -2   4   8   43.91    2.49
   2   4  -8   42.02    3.05
  -2   4   8   44.49    3.29
  -2   4   8   44.84    2.59
  -2   4   8   40.62    2.73
  -2  -4   8   41.87    2.31
   2   4  -8   44.94    2.74
   2   4  -8   39.78    3.22
   2  -4  -8   41.60    2.95
  -2  -4   8   39.95    3.20
   2  -4  -8   41.73    2.86
   2   4  -7   26.81    2.40
  -2  -4   7   25.15    2.46
   2  -4  -7   25.21    2.28
   2   4  -7   23.35    1.91
   2  -4  -7   24.40    2.11
   2   4  -7   23.43    2.41
  -2   4   7   24.73    2.36
  -2  -4   7   24.88    1.60
  -2   4   7   24.22    1.86
   2   4  -6   39.55    2.84
   2  -4  -6   40.55    2.47
   2   4  -6   39.63    2.93
  -2  -4   6   42.21    3.05
  -2  -4   6   38.94    1.82
   2  -4  -6   40.30    2.76
   2   4  -6   41.18    2.40
  -2   4   6   41.06    2.89
  -2   4   6   42.89    2.50
  -2  -4   5   25.34    1.33
   2   4  -5   24.77    2.21
  -2  -4   5   23.60    2.20
   2  -4  -5   24.57    2.12
   2   4  -5   24.76    2.11
   2  -4  -5   23.68    1.78
  -2   4   5   22.83    2.06
  -2  -4   5   24.33    1.23
  -2   4   5   24.97    1.93
   2   4  -5   24.58    1.75
   2   4  -5   24.78    2.25
  -2  -4   4   10.56    0.98
  -2  -4   4   13.57    1.67
   2  -4  -4   12.02    1.49
   2   4  -4   11.84    1.46
  -2  -4   4   10.51    0.64
  -2   4   4   12.07    1.45
   2   4  -4   13.18    1.60
   2  -4  -4   12.12    1.15
   2   4  -4   14.12    1.74
  -2   4   4   14.22    1.50
   2   4  -4   10.74    1.50
  -2   4   3  249.01    6.57
  -2  -4   3  235.07    5.46
   2  -4  -3  250.14    6.86
   2   4  -3  257.82    7.06
   2   4  -3  250.33    7.30
   2  -4  -3  240.34    5.33
  -2   4   3  244.31    6.51
   2   4  -3  257.32    7.35
   2   4  -3  259.55    6.62
  -2  -4   3  248.78    7.26
  -2  -4   2   11.80    1.14
  -2  -4   2   11.90    1.58
   2  -4  -2   12.84    0.95
   2   4  -2   12.60    1.54
   2  -4  -2   10.87    1.35
  -2   4   2   11.35    1.36
   2   4  -2   11.96    1.60
  -2   4   2   12.19    1.17
   2   4  -2   15.38    1.67
  -2   4   2   11.27    1.26
   2  -4  -1   64.69    3.26
   2   4  -1   66.48    3.49
   2  -4  -1   64.45    1.82
  -2  -4   1   68.43    2.89
  -2   4   1   69.62    2.53
  -2  -4   1   69.55    3.59
  -2   4   1   65.65    2.80
  -2   4   1   67.65    2.84
   2   4  -1   69.24    3.09
  -2  -4   0   43.65    2.44
  -2  -4   0   47.33    2.93
   2   4   0   47.97    2.54
  -2   4   0   45.22    2.70
  -2  -4   0   45.62    2.70
  -2   4   0   49.15    2.30
   2   4   0   45.31    2.81
   2  -4   0   48.98    2.80
  -2   4   0   47.58    1.84
   2   4   0   44.23    2.73
  -2   4   0   43.91    2.10
  -2   4   0   46.94    2.51
  -2   4  -1   79.59    3.60
  -2  -4  -1   71.47    3.26
   2   4   1   74.51    3.22
   2  -4   1   74.14    3.51
   2   4   1   75.89    3.53
   2  -4   1   77.08    3.46
  -2  -4  -1   75.66    3.48
   2   4   1   79.90    3.73
  -2   4  -1   82.77    3.29
  -2  -4  -2    9.63    1.32
  -2   4  -2   10.38    1.25
  -2   4  -2   11.04    1.40
  -2   4  -2    9.01    1.23
   2  -4   2   10.81    1.32
   2   4   2    9.36    1.33
   2   4   2   10.15    1.19
  -2  -4  -2   10.61    1.41
   2   4   2   10.97    1.36
   2  -4   3  261.70    7.10
  -2  -4  -3  253.30    7.00
  -2   4  -3  257.66    6.67
   2   4   3  246.11    4.58
  -2   4  -3  259.90    6.82
   2   4   3  247.69    6.81
   2  -4   3  265.32    6.37
   2   4   3  246.36    6.64
   2   4   3  256.57    6.53
  -2  -4  -3  249.71    7.02
   2  -4   4   11.76    1.59
  -2   4  -4   12.06    1.51
  -2  -4  -4    9.68    1.37
   2   4   4   11.36    1.37
  -2   4  -4   11.99    1.58
   2   4   4    9.65    1.27
  -2   4  -4   11.76    1.47
   2  -4   4   13.66    1.44
   2   4   4   10.52    0.96
   2   4   4   10.39    1.26
  -2  -4  -4   12.13    1.50
   2  -4   5   26.55    2.21
   2  -4   5   22.59    1.88
   2   4   5   23.51    1.82
  -2   4  -5   23.36    2.06
   2   4   5   24.50    1.54
  -2   4  -5   23.49    2.14
  -2  -4  -5   25.49    2.18
   2  -4   5   24.15    1.90
   2   4   5   23.56    1.96
   2   4   5   23.81    1.89
  -2   4  -6   40.41    2.82
   2   4   6   43.65    2.30
   2   4   6   42.64    2.72
  -2   4  -6   43.38    3.00
   2   4   6   46.56    2.63
   2  -4   6   44.26    2.94
   2   4   6   41.31    2.38
   2  -4   6   44.21    2.70
  -2  -4  -6   48.35    3.03
   2   4   7   23.72    2.30
   2  -4   7   26.48    2.37
  -2   4  -7   28.73    2.50
   2   4   7   29.01    2.35
  -2  -4  -7   29.21    2.45
   2  -4   7   28.76    2.32
   2   4   7   27.25    2.00
  -2   4  -7   30.67    2.59
  -2   4  -7   27.61    2.53
   2   4   7   26.88    2.37
  -2   4  -7   27.06    2.17
   2   4   7   26.83    1.82
   2   4   7   27.80    1.97
   2   4   8   37.46    2.97
   2   4   8   37.82    2.48
   2   4   8   35.82    2.72
  -2   4  -8   37.35    2.57
  -2   4  -8   36.96    2.97
   2   4   8   39.32    2.29
   2  -4   8   38.79    2.80
  -2  -4  -8   40.93    2.94
  -2   4  -8   34.65    2.98
   2   4   8   40.34    2.55
  -2   4  -8   41.90    3.17
   2   4   8   41.60    3.02
   2  -4   8   38.68    2.95
   2   4   9   24.79    2.51
   2  -4   9   23.37    2.35
  -2   4  -9   25.60    2.57
  -2  -4  -9   27.34    2.46
  -2   4  -9   27.24    2.44
  -2  -4  -9   24.17    2.46
   2   4   9   22.35    2.06
   2   4   9   26.58    2.62
  -2   4  -9   24.68    2.11
  -2   4  -9   23.97    1.99
   2  -4   9   25.93    2.38
  -2   4  -9   22.19    2.43
   2  -4  10   20.11    2.26
   2   4  10   19.68    2.15
   2   4  10   20.36    2.05
  -2   4 -10   19.72    2.30
  -2  -4 -10   20.81    2.42
   2   4  10   18.47    2.27
  -2   4 -10   20.71    2.48
   2   4  10   20.12    2.40
  -2  -4 -10   21.55    2.26
   2  -4  10   17.29    2.09
  -2   4 -10   21.10    2.45
  -2   4 -11    1.00    0.82
  -2  -4 -11    2.47    1.01
  -2   4 -11    1.07    0.86
   2   4  11    2.01    0.99
  -2  -4 -11    1.07    0.64
   2   4  11    0.86    0.83
   2  -4  11    1.24    0.62
   2   4  11    2.94    1.15
  -2   4 -11    2.10    0.91
   2   4  11    2.77    1.07
   2  -4  11    3.35    1.06
   2  -4  12   73.86    4.51
   2  -4  12   72.94    4.58
   2   4  12   73.66    4.83
  -2  -4 -12   73.70    4.95
   2   4  12   73.07    4.36
  -2   4 -12   68.86    4.49
  -2   4 -12   75.16    4.84
  -2  -4 -12   78.26    4.57
   2   4  12   77.01    4.44
   2   4  13   23.80    2.90
  -2   4 -13   23.05    2.77
   2   4  13   24.58    2.72
  -2   4 -13   24.08    2.74
   2  -4  13   20.25    2.52
   2   4  13   21.93    2.66
   2  -4  13   23.76    2.59
  -2  -4 -13   28.02    2.86
   2   4  13   25.35    2.60
  -2  -4 -13   24.38    2.94
   2   4  14   58.63    4.79
  -2   4 -14   59.74    4.46
   2  -4  14   59.32    4.47
  -2  -4 -14   58.90    4.80
   2   4  14   59.15    4.73
   2   4  14   63.62    4.49
  -2   4 -14   59.77    4.61
   2   4  14   57.08    4.33
   2   4  14   64.01    4.16
   2  -4  14   61.02    4.18
   2  -4  15   63.11    4.33
   2   4  15   62.81    5.14
   2  -4  15   66.40    2.54
  -2  -4 -15   62.29    5.15
  -2  -4 -15   66.25    2.63
   2  -4  15   63.68    2.58
  -2   4 -15   58.69    4.68
   2  -4  15   64.77    4.84
   2  -4  15   63.87    2.62
   2   4  15   64.89    4.67
   2   4  15   62.92    4.64
  -2   4 -15   64.01    4.84
   2   4  15   61.40    4.96
  -2   4 -15   63.66    2.64
  -2   4 -15   69.93    2.84
   2  -4  16   14.36    1.24
   2  -4  16   12.74    1.24
   2  -4  16   14.26    1.20
   2  -4  16   13.59    2.44
   2  -4  16   12.68    1.18
   2   4  16   13.42    2.33
  -2   4 -16   13.42    2.27
  -2  -4 -16   12.70    2.49
  -2   4 -16   14.21    1.29
  -2   4 -16   14.30    1.30
  -2  -4 -16   13.19    1.29
   2   4  16   13.00    2.44
   2   4  16   15.13    2.40
   2  -4  16   12.80    1.24
  -2  -4 -16   12.00    1.16
  -2  -4 -16   12.76    1.10
   2   4  16   15.30    2.44
   2  -4  17   25.43    1.71
  -2   4 -17   24.72    1.62
  -2   4 -17   26.07    1.74
  -2  -4 -17   26.91    1.73
   2  -4  17   23.88    1.69
   2  -4  17   24.14    1.61
   2   4  17   26.95    3.57
  -2   4 -17   25.12    1.72
  -2  -4 -17   24.55    1.51
   2   4  17   20.28    2.78
  -2  -4 -17   25.85    1.75
   2   4  17   23.71    2.97
   2  -4  17   27.00    1.63
   2  -4  17   20.50    2.88
   2  -4  17   24.44    1.69
   2   4  17   25.40    3.49
   2   4  17   31.43    3.76
  -2   4 -17   27.74    3.36
   2  -4  18   12.39    1.25
   2  -4  18   10.90    1.13
   2  -4  18   12.19    1.14
   2   4  18   12.93    2.59
  -2   4 -18   13.43    2.42
   2  -4  18   11.31    1.16
   2  -4  18   11.71    1.21
  -2   4 -18   11.82    1.21
  -2   4 -18   12.89    1.29
  -2  -4 -18   12.50    1.29
  -2   4 -18   12.07    1.22
   2   4  18    9.61    2.19
   2   4  18   10.90    2.17
   2   4  18   13.04    2.25
   2  -4  18   12.44    2.42
  -2  -4 -18   10.92    1.20
   2   4  18   12.62    2.57
  -2  -4 -19  123.68    4.00
   2  -4  19  122.49    3.99
   2  -4  19  126.90    3.95
   2  -4  19  124.07    4.01
   2  -4  19  125.35    3.68
  -2   4 -19  128.59    4.07
  -2   4 -19  125.28    7.28
   2  -4  19  118.93    3.79
  -2   4 -19  122.98    3.83
  -2   4 -19  124.02    4.03
   2   4  19  132.57    7.05
   2   4  19  125.22    7.90
  -2  -4 -19  124.99    4.07
   2   4  19  126.36    7.61
   2   4  19  128.05    7.91
  -2  -4 -20   17.11    1.49
   2  -4  20   19.55    1.35
  -2   4 -20   19.16    1.55
   2  -4  20   19.65    1.55
  -2   4 -20   18.41    1.51
   2   4  20   19.72    3.15
   2  -4  20   17.57    1.43
   2  -4  20   16.79    1.35
  -2  -4 -20   18.91    1.53
  -2   4 -20   19.18    2.82
   2  -4  20   19.22    1.52
  -2   4 -20   18.01    1.42
   2   4  20   16.98    2.92
  -2   4 -21   59.00    2.66
  -2   4 -21   58.78    2.64
  -2   4 -21   58.56    2.50
   2  -4  21   55.93    2.57
  -2  -4 -21   60.52    2.72
  -2   4 -21   59.14    5.02
   2   4  21   57.44    5.22
   2  -4  21   57.75    2.50
   2  -4  21   56.30    2.57
  -2  -4 -21   56.01    2.60
  -2  -4 -22   -0.02    0.50
  -2   4 -22    0.00    0.40
   2  -4  22    0.43    0.51
   2  -4  22   -0.08    0.39
   2   4  22    0.03    0.99
  -2  -4 -22   -0.06    0.46
  -2   4 -22    0.03    0.46
   2  -4  22   -0.17    0.51
   2  -4  22    0.55    1.34
  -2   4 -22   -0.05    0.48
  -2   4 -23   10.83    1.09
   2  -4  23   11.17    1.08
  -2  -4 -23   11.79    1.13
   2  -4  23    9.10    2.03
  -2   4 -23   12.30    1.18
  -2   4 -23   10.04    0.99
   2   4  23   11.17    2.31
   2   4  23    9.49    2.25
   2  -4  23    9.90    0.97
  -2   4 -24    3.24    0.62
  -2  -4 -24    2.55    0.63
   2  -4  24    4.10    0.68
   2  -4  24    3.11    0.58
  -2   4 -24    2.45    0.51
  -2   4 -25    0.77    0.45
   2  -4  25    0.22    0.36
  -2  -4 -25    0.53    0.37
  -2   4 -25    0.92    0.40
   2  -4  25    0.32    0.35
  -2   4 -25    1.07    0.46
   2   4  25    0.30    0.32
   2  -4  26    6.86    0.61
   2  -4  26    7.82    0.74
   2   4  26    9.43    0.73
  -2  -4 -26    9.14    0.82
  -2   4 -26    7.38    0.74
   2  -4  27   10.55    0.77
  -2   4 -27    9.58    0.70
   2   4  27   10.76    0.63
   2   4  27   10.66    0.72
  -2  -4 -27    8.69    0.71
   2  -4  28    0.14    0.21
  -2  -4 -28   -0.04    0.22
   2   5 -27    1.61    0.33
   2  -5 -27    1.95    0.34
  -2  -5  26    0.89    0.35
   2   5 -26    1.05    0.36
   2  -5 -26    1.51    0.38
  -2   5  26    0.87    0.29
  -2  -5  26    1.07    0.29
  -2  -5  25    1.45    0.39
  -2  -5  25    0.55    0.32
   2   5 -25    1.14    0.40
   2  -5 -25    0.99    0.41
   2   5 -25    1.33    0.36
  -2  -5  25    0.60    0.42
  -2  -5  24    1.63    0.52
   2  -5 -24    2.10    0.54
   2   5 -24    0.42    0.32
   2   5 -24    1.92    0.56
  -2  -5  24    1.47    0.42
  -2  -5  24    1.91    0.51
  -2   5  23   12.86    2.29
   2   5 -23   10.70    1.05
  -2  -5  23   11.04    1.02
  -2  -5  23   11.70    1.14
  -2   5  23   12.84    2.38
   2   5 -23   10.46    0.98
  -2  -5  23    9.11    0.92
   2  -5 -23   11.59    1.11
  -2  -5  22    0.68    0.46
  -2  -5  22    0.63    0.43
  -2  -5  22    1.05    0.55
  -2  -5  22    0.16    0.90
   2   5 -22    1.41    0.59
   2  -5 -22    0.90    0.60
   2   5 -22    1.61    0.57
   2   5 -22    1.10    0.56
  -2   5  22    2.33    1.61
  -2  -5  21    5.41    1.90
  -2  -5  21    6.02    0.90
   2   5 -21    5.79    0.84
   2  -5 -21    5.52    0.85
  -2  -5  21    6.13    0.97
   2   5 -21    6.08    0.92
  -2   5  21    4.67    1.60
   2   5 -21    4.38    0.81
   2  -5 -21    4.96    0.89
  -2  -5  21    5.49    0.90
   2   5 -20   14.78    1.32
   2   5 -20   14.16    1.34
   2   5 -20   14.33    1.33
   2  -5 -20   14.55    1.37
  -2  -5  20   15.21    1.32
  -2  -5  20   14.06    1.34
  -2  -5  20   14.26    2.82
  -2   5  20   15.81    2.81
   2  -5 -20   14.59    1.33
  -2  -5  20   12.03    1.25
  -2  -5  20   14.71    1.40
   2   5 -19   89.45    3.31
  -2  -5  19   89.34    6.74
   2   5 -19   95.44    3.49
  -2   5  19   92.00    6.77
   2  -5 -19   93.88    3.39
  -2   5  19   97.74    6.73
   2  -5 -19   93.84    3.51
  -2  -5  19   93.63    3.41
   2   5 -19   89.47    3.30
  -2  -5  19   95.49    3.57
  -2  -5  19   91.88    3.50
  -2  -5  19   95.14    3.46
  -2   5  19   95.01    6.07
   2   5 -18  131.02    4.02
  -2  -5  18  130.02    4.25
  -2  -5  18  136.01    8.30
  -2  -5  18  129.06    4.12
   2  -5 -18  126.31    4.16
  -2   5  18  131.65    7.79
  -2   5  18  136.98    8.16
   2   5 -18  131.82    4.18
   2  -5 -18  125.62    3.62
  -2  -5  18  132.03    4.28
   2   5 -18  129.22    4.05
   2  -5 -18  128.45    3.73
  -2   5  18  128.35    7.08
  -2  -5  18  132.46    4.18
   2  -5 -18  136.54    4.18
   2   5 -18  132.57    3.90
  -2  -5  17   43.55    4.65
  -2  -5  17   37.94    2.24
   2   5 -17   42.08    2.25
   2  -5 -17   41.80    4.38
   2  -5 -17   40.66    2.28
   2   5 -17   38.40    2.07
   2  -5 -17   38.43    1.94
  -2  -5  17   37.03    2.17
  -2   5  17   38.33    4.27
   2  -5 -17   41.68    2.22
   2   5 -17   38.76    2.09
   2  -5 -17   37.67    1.95
  -2   5  17   41.19    4.19
  -2  -5  17   42.05    2.32
  -2   5  17   40.43    3.95
   2   5 -17   39.71    2.09
  -2   5  16  237.51   10.88
  -2   5  16  235.16    9.42
  -2  -5  16  239.61   10.77
  -2   5  16  229.47    9.75
  -2  -5  16  226.73    5.78
   2  -5 -16  224.36    5.59
   2   5 -16  235.94    5.78
   2  -5 -16  238.11    5.31
   2   5 -16  232.26    5.49
   2   5 -16  226.20    5.50
   2  -5 -16  230.66    5.80
  -2  -5  16  230.47    5.80
   2  -5 -16  231.06    5.33
   2   5 -16  223.17    5.44
   2  -5 -16  224.94   10.01
  -2  -5  16  223.72    5.61
  -2   5  16  243.69   10.59
   2   5 -16  231.60    9.84
  -2   5  15    3.95    1.54
   2  -5 -15    5.58    0.89
  -2  -5  15    3.31    0.67
  -2   5  15    5.39    1.60
   2  -5 -15    4.69    0.98
  -2   5  15    5.40    1.65
  -2  -5  15    4.06    0.81
   2   5 -15    4.63    0.85
   2   5 -15    4.63    0.78
  -2  -5  15    4.11    1.59
   2   5 -15    3.87    0.67
   2  -5 -15    2.76    1.29
   2  -5 -15    4.55    0.73
  -2   5  15    3.24    1.21
  -2  -5  15    3.91    0.78
   2   5 -15    3.14    1.36
   2  -5 -15    5.02    0.78
  -2   5  14   40.05    4.19
  -2  -5  14   36.90    3.99
  -2  -5  14   38.50    2.11
   2  -5 -14   35.97    3.68
   2   5 -14   40.02    1.98
  -2   5  14   38.84    3.95
   2   5 -14   39.07    2.07
   2  -5 -14   39.05    2.09
  -2   5  14   35.48    3.52
  -2   5  14   39.38    3.68
   2  -5 -14   36.74    1.86
   2   5 -14   36.95    1.90
   2  -5 -14   37.58    2.01
   2   5 -14   35.58    3.68
   2  -5 -14   37.66    1.93
  -2   5  14   38.66    3.48
  -2  -5  14   37.53    2.07
  -2  -5  13   24.74    3.22
  -2   5  13   22.38    2.68
   2  -5 -13   21.05    2.71
  -2   5  13   23.89    2.81
  -2   5  13   19.55    2.84
  -2   5  13   21.80    2.91
   2   5 -13   19.27    2.74
  -2   5  13   23.69    2.62
   2  -5 -12   68.66    4.71
  -2  -5  12   71.16    5.22
   2   5 -12   69.15    5.10
   2  -5 -12   72.84    4.75
  -2   5  12   75.08    4.74
  -2   5  12   72.96    5.29
  -2   5  12   71.19    4.41
   2   5 -12   73.89    5.01
  -2   5  12   75.41    4.75
  -2   5  11   61.32    4.67
  -2  -5  11   53.58    4.38
  -2   5  11   60.63    4.04
   2   5 -11   53.31    3.95
   2   5 -11   58.13    4.53
  -2   5  11   55.45    3.90
   2  -5 -11   58.13    4.25
   2  -5 -11   58.62    4.07
  -2   5  10   54.01    3.38
  -2  -5  10   51.55    4.12
   2   5 -10   54.67    3.54
  -2   5  10   51.66    3.56
   2  -5 -10   54.25    3.98
   2  -5 -10   50.97    3.62
   2   5 -10   48.78    4.02
  -2   5  10   52.56    4.13
   2   5 -10   51.94    3.83
   2  -5  -9   60.60    4.05
  -2  -5   9   59.23    4.30
  -2   5   9   62.61    4.35
  -2   5   9   60.16    3.67
   2   5  -9   50.97    4.01
  -2   5   9   60.30    3.45
   2   5  -9   60.90    3.32
   2   5  -9   58.34    3.99
   2  -5  -9   55.78    3.57
  -2  -5   8  122.98    6.06
  -2   5   8  131.31    4.82
   2  -5  -8  132.28    5.92
   2   5  -8  123.14    6.04
   2   5  -8  136.36    4.86
   2   5  -8  128.62    5.89
   2  -5  -8  124.74    5.15
  -2   5   8  128.27    6.01
  -2   5   7   17.26    1.78
   2  -5  -7   17.96    2.13
  -2  -5   7   16.81    2.16
   2  -5  -7   18.19    1.81
   2   5  -7   18.56    1.65
   2   5  -7   16.05    2.09
  -2   5   7   16.52    2.08
   2   5  -7   15.50    2.13
  -2  -5   6   65.82    4.19
   2   5  -6   72.52    4.24
   2  -5  -6   67.21    3.27
   2   5  -6   68.52    3.08
  -2   5   6   69.01    4.03
   2   5  -6   62.54    3.98
  -2   5   6   68.06    3.51
   2  -5  -6   70.40    4.05
   2   5  -5  128.61    5.70
   2   5  -5  131.29    5.75
  -2  -5   5  129.91    5.79
   2   5  -5  140.67    4.35
   2  -5  -5  129.41    5.49
  -2   5   5  138.12    5.08
  -2   5   5  139.66    5.53
   2   5  -5  131.96    5.50
   2   5  -5  134.05    5.59
   2  -5  -5  135.21    4.38
   2   5  -4  364.02   10.01
  -2  -5   4  356.40    7.69
  -2  -5   4  369.93   10.12
   2  -5  -4  377.71    9.75
   2   5  -4  373.53    9.72
   2   5  -4  381.22    7.78
   2  -5  -4  368.66    7.44
   2   5  -4  371.41    9.63
  -2   5   4  377.68    9.35
   2   5  -4  377.19   10.13
  -2   5   4  370.50    9.04
   2   5  -3  180.50    6.60
  -2  -5   3  179.99    5.18
   2   5  -3  183.82    6.37
  -2   5   3  176.39    5.78
   2   5  -3  182.04    6.19
   2  -5  -3  194.66    6.49
  -2   5   3  180.24    5.93
   2  -5  -3  175.36    4.17
  -2  -5   3  175.43    6.56
  -2  -5   3  177.54    5.97
  -2   5   2   92.51    3.83
  -2  -5   2   92.73    3.77
  -2  -5   2   93.95    4.59
   2  -5  -2   93.43    4.34
  -2   5   2  101.71    3.56
   2   5  -2  101.36    4.54
  -2   5   2   89.22    3.61
   2   5  -2  100.11    4.31
  -2  -5   2   91.12    4.13
   2   5  -2   93.65    3.91
   2   5  -2   94.46    4.64
  -2  -5   1   25.33    2.37
  -2  -5   1   23.42    1.95
   2   5  -1   26.03    1.99
  -2   5   1   25.27    2.21
  -2   5   1   25.47    1.57
  -2   5   1   23.38    1.71
   2   5  -1   27.19    2.46
   2   5  -1   26.53    2.32
  -2   5   1   26.43    1.94
   2  -5  -1   27.55    2.33
   2   5  -1   27.17    2.10
  -2  -5   1   24.83    2.21
  -2   5   0   94.65    3.40
  -2  -5   0   94.33    4.05
   2   5   0   96.39    3.87
  -2   5   0   99.93    3.96
  -2   5   0   91.69    4.28
   2  -5   0   92.62    4.25
   2   5   0   93.44    4.54
  -2   5   0   92.49    3.38
   2   5   0   91.49    4.30
   2   5   0   87.61    4.32
  -2  -5   0   90.45    4.22
  -2   5  -1   30.02    2.15
  -2  -5  -1   26.87    2.31
  -2   5  -1   30.15    2.28
   2   5   1   28.07    2.41
   2  -5   1   27.53    2.33
   2   5   1   26.58    2.38
  -2  -5  -1   23.68    2.10
   2   5   1   28.60    2.08
  -2   5  -1   31.41    2.44
  -2   5  -2  103.27    4.33
   2  -5   2  104.72    4.55
   2  -5   2  104.08    3.82
  -2   5  -2  103.73    4.56
  -2   5  -2  104.84    3.98
  -2  -5  -2   98.86    4.44
   2   5   2  101.83    4.56
  -2  -5  -2  101.99    4.63
   2   5   2  107.82    4.78
   2   5   2  106.54    4.11
   2  -5   3  189.45    5.51
  -2  -5  -3  194.09    6.58
  -2   5  -3  191.63    6.05
   2   5   3  189.26    6.35
  -2   5  -3  196.49    6.66
   2   5   3  189.39    6.45
  -2  -5  -3  183.88    6.40
   2   5   3  194.19    5.83
   2  -5   3  189.82    6.33
   2   5   4  366.99    8.64
   2  -5   4  349.49    8.30
   2   5   4  350.47    9.04
   2  -5   4  365.83    9.24
  -2   5  -4  358.87    9.13
  -2  -5  -4  355.58    9.57
  -2   5  -4  362.19    8.93
  -2   5  -4  360.76    9.64
  -2  -5  -4  376.04    9.61
   2   5   4  339.51    9.05
   2  -5   5  119.06    4.44
  -2  -5  -5  112.19    5.20
   2  -5   5  118.05    4.58
  -2   5  -5  113.61    4.96
   2   5   5  116.52    4.60
  -2   5  -5  114.30    5.27
   2   5   5  114.20    4.86
   2   5   5  109.14    4.64
   2  -5   5  117.13    4.96
  -2  -5  -5  118.09    5.17
   2  -5   6   68.95    4.05
   2  -5   6   69.53    3.65
  -2  -5  -6   68.54    3.98
   2   5   6   65.63    3.57
   2  -5   6   71.39    3.50
  -2   5  -6   69.11    4.11
  -2   5  -6   67.58    3.91
  -2   5  -6   71.07    3.88
   2   5   6   67.00    3.50
   2   5   6   68.12    3.60
   2  -5   7   16.24    2.02
  -2  -5  -7   16.66    2.08
   2  -5   7   15.19    1.73
  -2   5  -7   14.59    1.97
   2  -5   7   15.49    1.83
   2   5   7   13.43    1.66
  -2   5  -7   15.71    1.82
  -2   5  -7   15.46    1.95
   2   5   7   16.47    1.77
   2   5   7   14.33    1.58
   2   5   7   16.10    1.69
  -2   5  -7   17.23    2.12
  -2  -5  -8  138.65    6.07
   2  -5   8  139.56    5.48
   2  -5   8  133.33    5.61
   2   5   8  134.55    4.88
   2  -5   8  142.17    6.10
  -2   5  -8  138.86    6.25
   2   5   8  134.21    5.96
  -2   5  -8  137.51    5.60
  -2   5  -8  128.61    5.93
   2   5   8  136.29    5.12
   2   5   8  136.30    4.75
   2   5   8  141.57    6.26
   2   5   8  130.42    5.47
  -2   5  -8  133.77    6.20
   2   5   9   56.89    3.22
   2  -5   9   56.20    3.87
  -2   5  -9   55.37    4.00
  -2   5  -9   59.55    4.21
   2  -5   9   56.24    3.59
   2   5   9   57.47    3.70
   2   5   9   53.52    3.80
  -2   5  -9   58.44    3.57
  -2   5  -9   55.05    3.52
   2   5   9   53.47    3.97
  -2   5  -9   58.92    3.82
  -2  -5  -9   58.47    4.01
   2  -5   9   58.34    3.82
   2  -5  10   47.80    3.67
   2  -5  10   48.87    3.68
  -2   5 -10   45.35    3.13
  -2  -5 -10   49.62    3.83
   2   5  10   51.57    3.27
  -2   5 -10   45.95    3.44
  -2   5 -10   53.28    4.09
   2  -5  10   49.92    3.56
   2   5  10   48.40    3.55
   2   5  10   49.09    3.87
  -2   5 -10   48.46    3.86
   2   5  10   50.84    3.80
   2  -5  11   61.49    4.07
   2  -5  11   60.27    4.19
   2   5  11   64.30    4.62
  -2   5 -11   56.30    4.39
  -2   5 -11   60.60    4.17
   2  -5  11   60.48    4.26
   2   5  11   56.87    3.99
   2   5  11   58.55    3.71
   2   5  11   61.44    4.30
  -2  -5 -11   64.25    4.38
   2   5  11   57.34    3.98
  -2   5 -11   56.54    4.33
   2   5  12   70.61    4.68
   2   5  12   74.46    5.11
   2   5  12   73.14    4.38
   2  -5  12   72.13    4.62
  -2   5 -12   70.64    5.01
  -2   5 -12   77.51    5.25
  -2  -5 -12   79.81    5.01
   2   5  12   71.59    4.54
   2   5  12   75.48    4.85
  -2   5 -12   78.13    4.84
  -2   5 -13   18.99    2.72
   2   5  13   18.75    2.61
   2   5  13   19.76    2.48
   2  -5  13   22.98    2.68
   2   5  13   24.21    3.00
   2   5  13   18.27    2.30
  -2   5 -13   21.63    2.69
  -2  -5 -13   21.77    2.69
   2   5  14   32.79    3.48
  -2   5 -14   38.16    2.03
  -2  -5 -14   37.34    1.95
   2  -5  14   38.85    1.96
   2  -5  14   37.35    1.99
   2   5  14   37.17    3.54
  -2   5 -14   40.88    3.77
   2  -5  14   38.67    1.99
  -2  -5 -14   35.02    1.93
  -2   5 -14   37.81    2.02
   2  -5  14   39.27    2.00
   2   5  14   38.14    4.02
  -2   5 -14   39.86    3.96
  -2  -5 -14   39.06    1.94
   2  -5  14   39.89    3.66
  -2  -5 -15    4.39    0.77
   2  -5  15    4.13    0.81
  -2  -5 -15    4.00    0.74
   2  -5  15    3.68    0.71
   2   5  15    3.92    1.27
  -2   5 -15    2.93    1.37
   2  -5  15    4.16    0.76
   2  -5  15    4.71    1.54
  -2  -5 -15    4.16    0.81
   2   5  15    3.96    1.49
  -2   5 -15    1.89    0.97
   2   5  15    3.75    1.48
  -2   5 -15    3.57    0.77
   2  -5  15    2.65    0.63
   2   5  15    2.79    1.07
  -2   5 -15    3.93    0.77
  -2   5 -15    5.57    0.90
   2   5  16  240.51   10.46
   2  -5  16  239.63    5.72
   2  -5  16  239.88    5.84
  -2   5 -16  244.38    5.89
   2   5  16  265.55    9.99
  -2   5 -16  247.28    9.93
   2  -5  16  244.51    9.94
  -2   5 -16  239.26    5.62
   2  -5  16  247.28    5.65
  -2   5 -16  241.04   10.30
  -2  -5 -16  249.06    5.61
  -2   5 -16  247.41    5.92
  -2  -5 -16  251.90    5.87
  -2  -5 -16  244.91    5.87
   2  -5  16  236.21    5.73
   2   5  16  251.35   11.03
  -2  -5 -17   46.74    2.34
   2  -5  17   46.60    4.52
   2  -5  17   45.59    2.36
  -2   5 -17   43.91    2.15
  -2   5 -17   47.83    2.39
   2  -5  17   42.57    2.24
  -2   5 -17   45.90    2.35
   2   5  17   49.97    4.24
   2   5  17   49.21    4.93
  -2  -5 -17   46.57    2.37
   2   5  17   42.54    4.41
  -2   5 -17   46.70    2.22
  -2   5 -17   47.11    4.35
  -2  -5 -17   44.35    2.12
   2  -5  17   43.41    2.15
   2   5  18  137.69    7.99
   2  -5  18  129.07    7.64
  -2   5 -18  136.87    3.96
  -2  -5 -18  127.18    4.07
  -2   5 -18  136.61    7.44
   2  -5  18  129.14    3.89
   2  -5  18  132.87    4.19
   2   5  18  135.17    8.30
  -2   5 -18  133.53    4.22
  -2  -5 -18  128.26    4.11
   2  -5  18  129.76    4.07
   2  -5  18  133.89    3.92
  -2  -5 -18  129.89    3.81
  -2   5 -18  140.46    4.30
   2   5  18  123.55    7.77
  -2  -5 -19   87.55    3.28
   2  -5  19   88.80    3.12
  -2   5 -19   85.23    3.07
   2  -5  19   92.80    6.48
  -2   5 -19   90.40    3.38
  -2   5 -19   91.25    3.41
  -2  -5 -19   89.82    3.37
  -2   5 -19   93.99    6.17
   2   5  19   90.17    6.45
  -2  -5 -19   91.24    3.04
   2  -5  19   89.02    3.35
   2   5  19   89.93    6.73
   2  -5  19   87.73    3.25
   2  -5  19   92.36    3.11
   2   5  19   88.28    6.51
  -2  -5 -20   13.76    1.32
  -2   5 -20   15.39    1.37
   2   5  20   15.53    2.83
[truncated: 1,373,255 more chars]
